# Supplementary material for: Genetic Control of Conventional and Pheromone-Stimulated Biofilm Formation in Candida albicans
Source: PLoS Pathog. 2013 Apr 18;9(4):e1003305. doi: 10.1371/journal.ppat.1003305 (PMC3630098; doi:10.1371/journal.ppat.1003305)
Supplement: Table S3 — Microarray data. Columns listed are in the same order as the experiments shown in Figure 5A. (P) = planktonic, (B) = biofilm, − indicates no pheromone, + indicates pheromone added. Sheet 1: All replicates and array probes, data is log2. Sheet 2: The mean value was taken of the array probes and replicates were averaged. Alternative name and description provide by the Candida Genome Database (candidagenome.org). Sheet 3: Lists of genes up- or down-regulated more than 4-fold. Sheet 4: Table of genes up- or down-regulated more than 4-fold. (XLSX) [file ppat.1003305.s007.xlsx]

## Sheet: normalized log2 data
		Name	WT+(P)/WT-(P)#1	WT+(P)/WT-(P)#2	tec1+(P)/tec1-(P)#1	tec1+(P)/tec1-(P)#2	cph1+(P)/cph1-(P)#1	cph1+(P)/cph1-(P)#2	WT+(B)/WT-(B)#1	WT+(B)/WT-(B)#2	WT+(B)/WT-(B)#3	tec1+(B)/tec1-(B)#1	tec1+(B)/tec1-(B)#2	cph1+(B)/cph1-(B)#1	wor1+(B)/wor1-(B)#1 4hr	wor1+(B)/wor1+(B)#2 4hr	WT+(B)/WT-(B)#1 24hr	wor1+(B)/wor1-(B)#1 24hr	WT+(B)/WT-(B)#1 opaque cell 4 hr
		CaalfMp01	0.116	-0.114	-0.05	-0.689	0.033	0.437	-0.119	-0.145	0.072	0.026	0.004	-0.327	-0.143	-0.187	0.053	0.872	0.609
		CaalfMp01	0.286	-0.012	0.186	-1.302	0.146	0.863	-0.012	0.208	0.035	0.154	0.123	-0.021	0.086	-0.089	-0.213	0.901	0.542
		CaalfMp02	0.252	NA	-0.065	-0.957	0.114	NA	NA	NA	0.311	NA	NA	NA	NA	NA	0.095	0.632	0.831
		CaalfMp02	NA	0.051	0.188	-0.716	NA	0.736	0.045	-0.387	0.039	0.172	-0.275	-0.094	0.005	-0.251	0.116	0.432	0.404
		CaalfMp03	0.315	0.067	0.08	-1.054	0.093	0.994	0.102	-0.819	-0.214	0.211	-0.559	-0.476	-0.443	-0.47	-0.289	0.037	0.122
		CaalfMp03	0.345	-0.134	0.141	-1.033	0.328	0.559	-0.032	-0.352	-0.143	0.062	-0.272	-0.122	-0.082	-0.169	-0.559	0.179	0.759
		CaalfMp05	NA	NA	NA	NA	NA	NA	NA	NA	NA	NA	NA	NA	NA	NA	NA	NA	NA
		CaalfMp05	NA	NA	NA	NA	NA	NA	NA	NA	NA	NA	NA	NA	NA	NA	NA	NA	NA
		CaalfMp06	0.185	NA	0.179	NA	0.193	NA	NA	NA	NA	NA	NA	NA	NA	NA	NA	NA	NA
		CaalfMp06	NA	-0.277	NA	-1.295	NA	0.804	-0.102	-0.111	-0.038	0.224	0.02	-0.061	0.104	-0.023	-0.337	0.41	0.58
		CaalfMp07	-0.282	-0.26	0.069	-1.015	-0.153	0.247	-0.223	-0.191	0.199	0.011	0.129	NA	-0.039	0.053	-0.119	0.362	0.255
		CaalfMp07	-0.235	-0.222	0.072	-0.706	0.047	0.296	-0.053	-0.147	0.337	0.085	-0.004	-0.018	NA	-0.077	0.014	0.374	0.451
		CaalfMp09	-0.507	-0.54	-0.423	-1.972	-0.64	0.252	-0.611	-0.68	-0.321	-0.54	-0.446	-0.959	-0.695	-0.831	-0.826	-0.638	NA
		CaalfMp09	-0.197	-0.613	-0.376	-2.276	-0.374	0.093	-1.042	NA	-0.336	-0.747	-0.646	-0.714	NA	NA	-1.425	NA	NA
		CaalfMp10	0.255	-0.019	0.043	-1.726	0.028	NA	-0.053	NA	NA	NA	NA	NA	NA	NA	-0.417	NA	NA
		CaalfMp10	NA	-0.268	0.11	-1.039	NA	0.462	-0.118	-0.418	-0.181	0.086	0.048	-0.02	-0.066	-0.031	-0.507	-0.035	0.755
		CaalfMp12	-0.057	-0.462	-0.199	-1.42	-0.201	0.474	-0.435	-0.375	-0.022	-0.202	-0.218	-0.056	-0.34	0.02	-0.734	0.008	NA
		CaalfMp12	0.151	-0.299	0.002	-1.482	-0.051	0.632	-0.427	-0.964	-0.409	-0.295	-0.803	-0.689	-0.706	-0.707	-0.704	-0.83	-0.426
		CaalfMp13	0.562	0.21	0.204	-0.515	0.124	0.325	-0.082	-0.081	-0.14	0.097	-0.199	-0.266	-0.088	-0.261	-0.12	-0.134	-0.154
		CaalfMp13	NA	0.086	0.312	-1.143	NA	0.625	0.097	0.193	0.157	0.298	0.334	0.082	NA	0.103	-0.258	0.277	0.444
		CaalfMp14	-0.401	-0.333	-0.398	-1.511	-0.491	0.484	-0.361	-0.256	-0.193	-0.237	-0.323	-0.212	-0.084	-0.232	-1.119	-0.385	0.772
		CaalfMp14	-0.076	-0.704	-0.169	-1.716	-0.073	0.374	-0.692	-0.517	-0.305	-0.472	-0.473	-0.388	-0.272	-0.48	-1.462	-0.644	0.239
		CaalfMp15	NA	NA	-0.162	NA	NA	NA	NA	NA	NA	NA	NA	NA	NA	NA	NA	NA	NA
		CaalfMp15	NA	NA	NA	-0.778	NA	NA	NA	NA	NA	NA	NA	NA	NA	NA	0.373	NA	NA
		CaalfMp15	NA	NA	NA	-0.61	NA	NA	NA	NA	NA	NA	NA	NA	NA	NA	NA	NA	NA
		CaalfMp15	NA	NA	NA	-0.469	NA	NA	NA	NA	NA	NA	NA	NA	NA	NA	NA	NA	NA
		CaalfMp15	NA	NA	NA	NA	NA	NA	NA	NA	NA	NA	NA	NA	NA	NA	NA	NA	NA
		DarkCorner	-0.632	NA	-1.988	0.221	-1.721	-0.571	0.204	-0.73	NA	-1.208	-1.463	-0.599	-1.221	-0.792	1.496	-1.01	NA
		DarkCorner	-0.474	1.058	-0.988	-2.782	-1.659	-0.184	0.194	-1.245	-4.145	0.009	NA	-2.213	-1.905	-0.324	0.115	-0.285	-1.249
		DarkCorner	-0.217	-0.273	-0.987	-0.618	-1.316	NA	-1.562	-0.309	-0.932	0.038	-0.366	-2.059	-1.327	-1.158	1.382	-0.145	NA
		DarkCorner	-0.114	0.818	-0.04	0.077	-0.983	-3.596	NA	-0.192	-2.179	NA	-0.736	NA	-1.541	-1.388	0.506	-0.869	-3.045
		DarkCorner	-0.01	NA	-0.03	NA	-0.584	NA	0.145	-0.811	-1.86	NA	NA	NA	NA	-1.289	NA	NA	NA
		DarkCorner	0.071	1.039	-0.03	-0.967	-0.546	-0.373	0.185	-0.722	-2.479	1.661	-2.139	NA	-0.84	0.113	NA	-0.48	-1.579
		DarkCorner	0.149	0.658	0.013	-0.097	-0.291	-0.48	NA	0.024	NA	-0.035	NA	-2.213	NA	-2.613	NA	NA	-0.005
		DarkCorner	0.162	0.244	0.014	-0.066	-0.209	NA	-0.197	0.555	-0.772	NA	-0.181	-2.213	-2.463	-1.735	NA	-0.8	0.092
		DarkCorner	0.173	0.54	0.018	NA	-0.057	0.011	-0.13	-0.62	NA	NA	NA	-1.85	NA	-0.317	0.115	-0.504	-1.507
		DarkCorner	0.199	0.606	0.048	-0.454	0.041	1.105	NA	0.731	-1.205	NA	-0.005	NA	0.145	NA	0.876	1.159	0.353
		DarkCorner	0.216	0.382	0.075	0.006	0.087	-1.597	NA	0.687	-1.181	NA	-0.233	-2.487	-0.26	-1.562	NA	-0.554	-0.62
		DarkCorner	0.241	0.822	0.087	NA	0.158	0.608	NA	-0.742	-3.984	NA	-2.247	-1.52	-1.13	-2.565	NA	-0.053	-1.879
		DarkCorner	0.263	-0.282	0.098	0.542	0.284	0.131	-0.077	-0.622	-2.737	NA	-0.993	-1.114	-1.117	-0.855	1.496	0.08	NA
		DarkCorner	0.275	1.033	0.106	0.184	0.284	-1.771	NA	0.233	-1.658	NA	-0.494	NA	0.913	NA	NA	NA	NA
		DarkCorner	0.277	0.513	0.107	-1.13	0.764	1.547	-0.569	-0.515	-3.453	-0.219	-3.221	-2.213	-1.697	-0.855	-0.164	0.116	-0.947
		DarkCorner	0.287	-0.244	0.133	NA	0.883	-0.058	NA	-0.996	-1.501	NA	-1.357	-1.209	-3.02	NA	1.179	-0.192	-0.403
		DarkCorner	0.293	0.049	0.137	0.516	1.558	0.951	NA	-0.147	-1.379	NA	0.357	NA	1.036	-0.595	NA	-0.229	NA
		DarkCorner	0.327	0.22	0.152	NA	1.847	0.195	-1.68	-0.289	-1.953	NA	-1.054	-2.775	-2.282	-2.413	-1.169	-0.338	-0.947
		DarkCorner	0.329	0.778	0.171	-0.134	2.158	0.911	-2.169	0.802	-0.319	0.637	0.605	-1.02	0.98	-0.68	NA	0.547	-0.771
		DarkCorner	0.36	0.912	0.184	-1.376	2.158	0.395	1.964	-0.223	-4.067	NA	-1.626	-2.318	-1.697	-2.666	-0.164	-0.73	NA
		DarkCorner	0.384	0.759	0.185	-0.166	NA	0.466	-0.694	NA	-1.168	0.463	-0.014	-0.628	-3.085	-1.419	2.351	0.684	NA
		DarkCorner	0.406	NA	0.189	0.085	NA	0.108	0.635	NA	-1.276	0.757	-0.086	-0.285	-1.067	-0.076	0.35	0.607	-1.714
		DarkCorner	0.471	NA	0.216	NA	NA	-0.603	-1.541	-0.484	-0.466	-0.365	-0.004	0.491	-0.795	-3.335	NA	0.216	-2.231
		DarkCorner	0.492	0.064	0.236	-0.045	NA	0.166	NA	-0.165	-4.067	0.628	-0.526	-1.093	0.075	-0.148	NA	NA	-0.937
		DarkCorner	0.521	NA	0.28	NA	NA	0.211	-0.658	0.004	-0.204	-0.705	0.279	0.573	-1.804	-0.753	NA	0.675	NA
		DarkCorner	0.557	NA	0.304	0.258	NA	-0.788	NA	0.331	NA	-0.247	-0.366	-2.545	-1.271	0.019	NA	NA	NA
		DarkCorner	0.57	NA	0.309	-0.032	NA	-0.092	-0.169	-1.767	-1.996	0.405	-0.304	-1.52	0.084	0.091	-0.943	-0.338	-1.714
		DarkCorner	0.586	NA	0.335	NA	NA	0.094	-1.228	-0.317	-0.262	0.564	0.349	0.661	0.078	-0.99	0.524	1.087	-0.474
		DarkCorner	0.693	NA	0.361	NA	NA	-0.307	0.885	-0.069	-0.616	0.009	0.006	0.349	-0.98	-2.186	0.35	0.961	-2.062
		DarkCorner	0.893	NA	0.558	-1.349	NA	NA	NA	NA	-2.16	NA	-0.713	NA	NA	-0.177	NA	-0.913	-1.371
		DarkCorner	0.93	NA	0.606	NA	NA	-0.31	NA	-0.366	-2.479	-0.012	-0.449	-1.632	-0.459	-0.067	1.071	-0.327	-0.531
		DarkCorner	1.085	-0.785	2.014	NA	NA	-0.226	-0.525	-0.077	0.322	NA	-0.106	0.28	0.048	-1.417	-0.466	1.248	-1.34
		DarkCorner	1.726	0.28	NA	-0.124	NA	-0.172	NA	0.196	-1.283	-0.365	0.056	-1.907	-2.519	-0.944	0.227	-1.651	-0.395
		DarkCorner	1.746	NA	NA	NA	NA	-0.139	-0.76	-0.318	0.433	0.009	-0.015	0.552	-1.533	-2.125	-0.618	1.274	-1.276
		DarkCorner	NA	NA	NA	NA	NA	-0.154	0.905	-0.129	0.099	-0.177	-0.55	0.423	-1.675	-0.762	0.478	0.609	-1.591
		DCP_1_0	-0.161	-0.456	-0.741	-1.238	0.349	-0.317	-0.21	NA	-0.065	0.177	0.02	-0.025	NA	NA	NA	1.048	NA
		DCP_1_0	0.157	-0.065	0.109	0.031	0.349	0.386	0.583	-0.394	-0.127	0.007	0.041	-0.292	-0.183	0.342	0.179	0.172	-0.185
		DCP_1_1	-0.07	NA	0.018	0.37	-0.829	0.164	0.509	NA	0.773	0.382	-0.489	NA	NA	NA	NA	NA	NA
		DCP_1_1	0.16	-0.483	0.379	0.024	0.449	0.466	NA	1.81	0.56	-0.113	-0.005	NA	NA	NA	NA	NA	0.802
		DCP_1_11	0.33	0.199	-0.039	0.75	-0.122	0.544	0.284	NA	0.569	0.254	-0.273	0.884	-0.069	NA	-0.2	NA	NA
		DCP_1_11	0.512	NA	-0.026	0.513	NA	NA	0.22	-0.597	0.012	NA	0.366	-0.863	NA	-0.25	NA	NA	NA
		DCP_1_2	-0.321	0.019	0.332	0.344	-1.111	-0.165	0.435	-4.041	-0.074	-0.424	-0.337	0.137	NA	-0.084	1.228	-2.116	NA
		DCP_1_2	-0.175	-0.525	0.519	0.135	-0.079	-0.038	0.193	-3.311	-0.019	-0.508	-0.55	0.117	-0.312	NA	0.337	-0.202	0.3
		DCP_1_4	-0.167	0.415	-0.04	-0.277	0.231	0.339	-0.211	NA	-0.271	-0.147	-0.668	-0.001	0.533	0.201	0.569	-0.409	0.263
		DCP_1_4	0.167	-0.241	0.225	-0.746	0.558	0.022	0.176	-0.303	-0.329	-0.059	0.126	-0.414	-0.178	0.701	-0.257	-0.883	-0.072
		DCP_1_7	0.254	-0.22	0.271	0.051	-0.633	0.117	-0.251	NA	0.642	-0.324	1.986	-0.285	0.18	2.181	-0.349	NA	NA
		DCP_1_7	0.293	-0.423	0.295	0.312	0.703	-0.001	0.417	5.769	-0.03	0.538	NA	-0.262	NA	0.574	-0.045	NA	NA
		DCP_20_0	-0.458	-0.506	-0.006	-0.572	-0.274	-0.004	-0.744	-0.514	-0.397	-0.522	-0.529	-0.305	0.034	-0.081	-0.891	-0.542	-0.416
		DCP_20_0	0.096	-0.567	0.03	-0.626	-0.013	0.045	-0.468	-0.366	-0.349	-0.432	-0.377	-0.255	-0.157	0.116	-0.419	-0.305	-0.323
		DCP_20_1	-0.247	-0.586	-0.318	-0.142	-0.543	-0.3	-0.678	-0.633	0.007	-0.294	-0.309	-0.165	0.051	0.364	-0.628	-1.248	-0.447
		DCP_20_1	0.008	-0.361	0.085	-0.618	-0.191	-0.109	-0.123	-0.452	-0.447	-0.356	-0.568	-0.212	0.286	0.032	-0.606	-0.457	-0.284
		DCP_20_3	-0.191	-0.659	-0.06	-0.622	-0.525	-0.081	-0.536	-0.596	-0.351	-0.383	-0.394	-0.141	-0.021	-0.284	-0.528	-0.606	-0.095
		DCP_20_3	-0.06	-0.437	0.123	-0.952	-0.452	-0.057	-0.502	-0.583	-0.338	-0.549	-0.432	0.178	-0.243	-0.319	-0.416	-0.804	0.208
		DCP_20_5	-0.501	-0.154	0.007	-0.592	-0.284	1.052	-0.43	-0.066	-0.071	-0.205	-0.133	-0.014	0.149	0.23	0.049	0.148	-0.232
		DCP_20_5	0.013	-0.502	0.042	-0.69	0.209	0.314	0.713	0.182	0.165	0.068	0.005	0.107	0.325	0.194	0.254	0.301	-0.252
		DCP_20_7	-0.47	-0.39	-0.007	-0.049	-0.257	0.294	-0.107	NA	-0.127	-0.234	-0.167	-0.14	0.523	-0.262	-0.733	0.28	0.014
		DCP_20_7	0.005	-0.532	0.123	-0.928	-0.222	-0.013	-0.124	-0.24	-0.397	-0.312	0.327	-0.334	-0.79	0.563	-0.236	0.221	-1.003
		DCP_20_9	0.175	-0.507	0.24	0.165	-0.2	0.381	-0.417	-0.147	-0.203	-0.045	-0.346	0.212	0.724	0.27	-0.557	0.141	-0.478
		DCP_20_9	0.903	-0.518	0.319	0.023	1.027	-0.402	0.171	-0.659	NA	-0.466	NA	0.504	-0.294	0.109	-0.08	NA	0.718
		DCP_22_0	0.013	0.131	-0.301	-0.061	0.054	0.401	0.342	0.035	0.144	0.063	-0.005	-0.016	0.286	0.139	0.717	0.448	0.199
		DCP_22_0	0.042	0.067	-0.156	-0.034	0.104	0.491	0.284	0.033	0.115	0.176	0.155	-0.01	0.414	0.194	0.552	0.326	0.06
		DCP_22_2	0.055	-0.031	-0.153	-0.177	0.168	0.54	0.352	0.206	0.173	0.223	-0.143	-0.071	0.303	0.139	0.637	0.254	0.335
		DCP_22_2	0.064	-0.118	-0.092	-0.143	0.321	0.339	0.236	0.135	0.248	0.109	0.227	0.076	0.303	0.227	0.574	0.258	0.214
		DCP_22_4	-0.12	0.272	-0.259	-0.034	-0.014	0.52	0.519	0.385	0.175	0.279	0.125	0.182	0.388	0.28	0.944	0.453	0.31
		DCP_22_4	-0.053	0.199	-0.199	0.184	0.005	0.513	0.331	-0.009	0.095	0.253	0.164	0.205	0.491	0.208	0.622	0.411	0.132
		DCP_22_6	-0.157	0.128	-0.273	-0.094	0.029	0.622	0.605	0.134	0.193	0.342	0.085	-0.036	0.421	0.192	0.91	0.517	0.113
		DCP_22_6	-0.085	0.141	-0.263	-0.165	0.048	0.437	0.324	0.304	0.244	0.21	0.142	-0.097	0.518	0.152	0.767	0.496	0.229
		DCP_22_7	-0.166	0.088	-0.273	-0.048	-0.091	0.449	0.408	0.228	0.191	0.336	0.164	0.044	0.427	0.3	0.775	0.458	0.347
		DCP_22_7	-0.035	0.06	-0.152	-0.071	-0.01	0.477	0.199	0.179	0.169	0.232	0.245	0.165	0.356	0.298	0.661	0.403	0.218
		DCP_22_9	0.228	0.174	-0.037	0.094	0.211	0.491	0.408	0.21	0.257	0.345	0.219	0.404	0.561	0.115	0.962	0.338	-0.11
		DCP_22_9	0.242	0.309	0.011	0.439	0.367	0.525	0.386	0.298	0.197	0.321	0.309	0.207	0.502	0.365	0.631	0.045	0.289
		E1A_r60_1	-0.603	0.152	-0.371	0.168	-1.603	-0.433	0.213	0.078	-0.026	-0.513	0.422	-2.153	-1.086	0.005	0.115	0.846	-0.687
		E1A_r60_1	-0.426	0.406	-0.259	0.134	-0.475	0.482	NA	0.885	NA	-0.542	NA	-0.272	-0.763	-0.663	NA	-0.053	0.244
		E1A_r60_1	-0.395	0.302	-0.132	0.572	-0.381	-0.185	1.229	0.076	-0.889	0.86	0.041	-0.535	-0.069	-0.316	NA	-0.534	-0.403
		E1A_r60_1	-0.321	0.467	-0.11	-0.055	-0.381	0.515	0.2	0.347	-0.231	0.136	-1.463	0.147	NA	-0.043	NA	0.243	NA
		E1A_r60_1	-0.309	-0.544	-0.1	0.524	-0.29	-0.183	0.192	0.266	-0.622	-0.457	-0.075	-0.708	-0.642	0.04	0.942	-0.644	-0.143
		E1A_r60_1	-0.291	NA	-0.097	NA	-0.171	0.524	0.84	0.795	0.609	0.714	-0.667	0.435	-0.704	-0.145	0.496	-0.106	0.655
		E1A_r60_1	-0.236	0.681	-0.059	0.342	-0.171	0.311	-0.567	-0.462	-0.114	0.014	-0.094	-0.502	0.001	NA	-0.63	-0.472	-1.568
		E1A_r60_1	-0.229	0.866	-0.05	0.045	-0.122	0.368	0.055	-0.276	0.232	-0.466	-0.027	NA	-0.313	-0.386	0.61	0.084	-0.073
		E1A_r60_1	-0.2	-0.483	-0.029	-0.291	-0.068	0.328	NA	-0.625	0.152	0.319	NA	-0.572	NA	0.252	-0.929	NA	-0.468
		E1A_r60_1	-0.149	-0.384	0.057	0.616	0.036	0.35	0.272	-0.833	0.653	0.209	-0.641	0.284	-0.687	-0.445	0.804	-0.694	-0.776
		E1A_r60_1	-0.125	-0.004	0.06	0.246	0.12	0.64	-0.675	-1.046	0.195	-0.318	-0.898	0.451	0.225	0.639	-0.56	-0.626	NA
		E1A_r60_1	-0.108	0.412	0.132	-0.164	0.174	0.642	0.216	-0.147	-0.479	-0.374	-1.003	0.716	-0.088	-0.45	0.743	-0.822	0.917
		E1A_r60_1	-0.078	0.006	0.133	1.245	0.238	0.477	0.116	-1.07	1.292	0.217	-0.609	0.334	NA	NA	0.153	NA	-1.113
		E1A_r60_1	-0.061	-0.053	0.139	-0.503	0.266	-0.092	0.034	-0.985	-0.005	-0.35	-0.264	0.291	-0.372	0.395	-0.199	0.559	-0.201
		E1A_r60_1	-0.051	0.724	0.141	-0.161	0.283	-0.168	-0.311	0.2	-0.779	-0.661	-0.111	-0.1	0.047	-0.06	-0.062	-0.935	0.327
		E1A_r60_1	0.079	0.478	0.147	-0.541	0.396	-0.106	0.01	0.055	-0.231	0.062	0.306	0.29	-0.594	-0.372	0.013	-1.546	NA
		E1A_r60_1	0.08	-0.064	0.166	0.253	0.409	0.642	0.286	0.129	-0.477	-0.111	4.895	0.333	-0.291	-1.53	0.067	0.647	-0.152
		E1A_r60_1	0.247	-0.098	0.17	0.001	0.429	0.209	-0.304	0.534	0.365	0.024	0.843	0.451	0.272	-0.319	-0.022	-0.192	-0.421
		E1A_r60_1	0.288	-0.583	0.249	0.291	0.437	0.228	-0.351	-0.004	-0.974	0.123	0.486	-0.821	NA	0.097	NA	NA	NA
		E1A_r60_1	0.307	0.366	0.316	-0.255	0.657	0.276	0.181	-0.462	0.267	NA	-0.441	0.216	-0.001	0.062	-0.432	1.066	NA
		E1A_r60_3	-0.416	NA	-0.146	0.198	-0.341	NA	0.066	0.118	NA	0.575	NA	0.511	-0.361	NA	0.854	0.588	NA
		E1A_r60_3	-0.285	0.241	-0.107	0.426	-0.208	-0.194	-0.224	0.54	0.074	0.046	0.12	0.24	0.166	0.177	0.728	0.533	1.415
		E1A_r60_3	-0.177	NA	-0.104	-0.129	-0.146	-0.066	-0.031	0.187	0.07	-0.194	0.154	-0.015	-0.013	0.956	0.458	0.915	NA
		E1A_r60_3	-0.162	0.208	-0.093	0.061	-0.083	0.152	0.149	0.362	0.515	-0.21	0.398	-0.045	0.009	0.062	0.765	1.214	1.436
		E1A_r60_3	-0.158	-0.163	-0.021	0.83	-0.079	-0.028	0.127	0.165	0.211	0.136	0.342	0.143	-0.047	0.789	0.565	0.893	1.468
		E1A_r60_3	-0.151	0.07	-0.016	-0.412	-0.067	-0.077	-0.129	0.442	0.433	-0.219	0.522	0.333	-0.126	0.067	0.608	0.206	0.961
		E1A_r60_3	-0.049	-0.12	0.023	1.131	0.033	0.984	-0.525	0.189	-0.026	-0.058	0.53	0.151	NA	-0.052	0.154	1.293	0.752
		E1A_r60_3	-0.046	0.703	0.055	0.078	0.035	-0.015	0.248	0.246	0.15	-0.219	0.291	0.249	0.203	-0.044	0.992	1.038	1.568
		E1A_r60_3	-0.04	0.139	0.056	0.455	0.067	-0.012	-0.128	-0.344	0.108	-0.043	0.083	0.428	-0.01	-0.132	0.863	1.387	1.372
		E1A_r60_3	0.048	-0.097	0.087	-0.111	0.109	0.532	-0.429	0.324	0.36	0.326	0.201	0.067	0.042	0.515	1.014	0.991	1.439
		E1A_r60_3	0.074	-0.097	0.092	-0.052	0.136	-0.004	-0.21	0.472	-0.113	0.062	0.358	0.488	0.232	0.158	0.612	1.35	1.401
		E1A_r60_3	0.21	0.223	0.117	-0.323	0.155	-0.057	0.121	0.061	0.067	-0.206	0.204	0.87	0.133	0.093	1.037	0.776	1.389
		E1A_r60_3	0.219	-0.243	0.188	0.182	0.168	-0.054	-0.085	0	0.518	0.071	-0.09	0.667	-0.209	-0.242	0.954	1.056	1.147
		E1A_r60_3	0.237	0.116	0.191	-0.019	0.189	-0.098	0.147	0.357	0.045	0.024	0.203	0.43	0.024	-0.45	0.678	1.246	1.573
		E1A_r60_3	0.242	-0.232	0.209	-0.119	0.283	0.234	0.083	-0.188	0.043	0.178	0.321	0.408	0.307	0.065	0.48	1.838	1.487
		E1A_r60_3	0.283	-0.046	0.227	0.412	0.356	-0.285	-0.62	0.226	0.704	-0.342	-0.279	0.434	-0.435	0.559	0.605	0.887	1.051
		E1A_r60_3	0.432	0.063	0.25	-0.166	0.385	-0.073	-0.031	-0.306	0.246	-0.143	0.373	0.606	-0.054	-0.119	0.925	0.861	1.854
		E1A_r60_3	0.437	-0.298	0.32	0.367	0.481	0.325	-0.003	1.413	0.847	-0.332	0.603	0.178	1.258	0.393	0.82	0.962	1.338
		E1A_r60_3	0.477	-0.07	0.341	-0.632	0.511	0.308	0.529	0.052	0.297	-0.156	0.09	0.329	0.037	-0.457	0.263	1.201	0.998
		E1A_r60_3	0.984	1.482	NA	-0.007	NA	-0.173	-0.563	1.188	-1.248	0.264	0.335	0.157	NA	0.425	1.313	1.651	1.465
		E1A_r60_a104	-0.07	0.269	-0.257	-0.014	0.019	0.358	0.287	0.155	0.01	0.23	0.081	0.094	0.227	0.387	0.899	0.193	0.153
		E1A_r60_a104	-0.038	0.125	-0.219	-0.155	0.027	0.338	0.328	-0.047	0.322	0.28	0.126	0.086	0.287	0.226	1.044	0.424	0.115
		E1A_r60_a104	-0.031	0.107	-0.178	-0.28	0.034	0.275	0.229	0.157	-0.097	0.239	0.115	0.062	0.135	0.242	1.046	0.357	0.172
		E1A_r60_a104	0.014	0.259	-0.177	0.14	0.062	0.356	0.385	0.35	0.111	0.268	-0.065	0.006	0.262	0.133	0.992	0.073	0.082
		E1A_r60_a104	0.049	0.169	-0.167	0.106	0.077	0.381	0.239	0.14	0.154	0.082	0.219	0.017	0.299	0.079	0.93	0.173	0.088
		E1A_r60_a104	0.057	0.241	-0.148	0.541	0.116	0.352	0.415	-0.207	0.121	0.605	0.1	0.254	-0.145	0.208	0.864	0.211	0.364
		E1A_r60_a104	0.094	0.092	-0.137	-0.084	0.117	0.237	0.24	0.247	0.133	0.13	0.209	0.078	0.166	0.212	0.931	0.187	0.114
		E1A_r60_a104	0.101	0.152	-0.082	0.21	0.139	0.287	0.322	0.214	0.075	0.283	0.048	-0.003	0.197	0.253	0.901	0.295	0.172
		E1A_r60_a104	0.112	0.31	-0.069	-0.094	0.15	0.526	0.247	0.185	0.034	0.216	0.107	-0.054	0.305	0.237	0.829	0.263	0.04
		E1A_r60_a104	0.113	0.395	-0.057	-0.089	0.154	0.549	0.276	0	0.189	0.177	0.284	0.099	0.338	0.176	0.689	0.174	-0.016
		E1A_r60_a104	0.14	0.018	-0.054	0.487	0.186	0.408	0.122	0.032	0.24	0.256	0.182	0.18	0.306	-0.006	0.714	0.201	0.079
		E1A_r60_a104	0.155	-0.001	-0.023	-0.019	0.187	0.485	-0.148	-0.271	0.396	0.094	-0.162	0.14	0.279	0.471	0.592	0.186	0.492
		E1A_r60_a104	0.162	0.391	-0.013	-0.174	0.238	0.361	0.268	-0.065	0.197	0.023	0.179	0.311	0.24	0.382	0.565	0.213	0.171
		E1A_r60_a104	0.164	0.15	-0.009	0.282	0.247	0.69	0.157	0.087	0.187	0.089	-0.016	0.156	0.449	0.124	0.482	0.131	0.435
		E1A_r60_a104	0.172	0.048	-0.004	-0.681	0.257	0.386	0.292	-0.184	0.252	-0.049	0.37	0.143	0.313	0.15	0.724	0.257	0.112
		E1A_r60_a104	0.21	0.214	0.005	-0.649	0.266	-0.074	0.178	-0.036	0.083	-0.118	0.081	0.229	0.095	0.067	0.55	0.301	0.192
		E1A_r60_a104	0.212	0.194	0.024	-0.116	0.333	0.129	0.437	0.004	-0.014	0.151	0.068	-0.099	0.318	0.246	0.475	0.22	0.085
		E1A_r60_a104	0.222	0.292	0.074	0.02	0.348	0.541	0.295	0.267	0.298	0.075	0.471	0.334	0.418	0.059	0.475	0.333	0.152
		E1A_r60_a104	0.247	0.095	0.084	-0.877	0.516	0.509	0.155	0.025	0.072	-0.226	0.108	0.052	0.386	0.333	0.637	0.315	0.175
		E1A_r60_a104	0.345	0.188	0.185	0.295	0.528	0.459	0.32	0.209	0.24	0.231	0.049	0.078	0.41	0.297	0.385	0.336	0.117
		E1A_r60_a107	-0.043	0.173	-0.288	-0.231	0.067	0.504	0.16	0.348	0.313	0.04	0.225	-0.201	0.38	0.05	0.797	0.394	-0.152
		E1A_r60_a107	0.066	0.436	-0.192	-0.189	0.073	0.66	0.28	0.388	0.187	0.181	0.015	-0.015	0.234	0.178	0.872	0.129	0.087
		E1A_r60_a107	0.082	0.25	-0.181	-0.367	0.115	0.427	0.093	0.22	-0.004	0.192	0.278	0.012	0.286	0.225	0.764	0.111	-0.168
		E1A_r60_a107	0.105	0.303	-0.17	-0.536	0.132	0.729	0.33	0.224	0.041	0.38	-0.006	-0.07	0.562	0.292	0.606	0.359	0.381
		E1A_r60_a107	0.107	0.218	-0.162	-0.195	0.137	0.341	0.318	0.093	0.044	0.166	0.107	0.099	0.235	0.098	0.61	0.263	-0.251
		E1A_r60_a107	0.121	0.411	-0.161	0.017	0.145	0.7	0.106	0.197	0.365	0.319	-0.033	-0.125	-0.113	0.239	0.712	0.221	0.124
		E1A_r60_a107	0.132	0.178	-0.109	-0.143	0.163	0.576	0.146	-0.207	0.037	0.256	-0.231	-0.175	0.394	0.069	0.808	0.243	0.002
		E1A_r60_a107	0.14	0.193	-0.09	-0.073	0.165	0.44	0.169	-0.075	0.237	0.135	0.433	-0.077	0.127	0.162	0.81	0.155	-0.117
		E1A_r60_a107	0.165	0.345	-0.082	-0.064	0.208	0.557	0.376	0.085	0.253	0.19	0.006	-0.177	0.221	0.057	0.407	0.277	0.125
		E1A_r60_a107	0.193	0.062	-0.061	-0.001	0.247	0.723	0.519	-0.242	0.045	0.533	0.125	-0.246	0.45	0.483	0.358	0.078	-0.118
		E1A_r60_a107	0.211	0.378	-0.056	-0.13	0.251	0.381	0.217	0.092	0.216	0.038	0.19	-0.025	0.441	0.293	0.762	0.221	-0.002
		E1A_r60_a107	0.256	0.15	-0.028	0.047	0.262	0.687	0.27	-0.35	-0.059	0.099	0.127	-0.213	0.269	0.369	0.294	0.21	0.114
		E1A_r60_a107	0.286	0.107	-0.023	-0.557	0.265	0.404	0.255	0.159	0.464	0.058	0.114	-0.325	0.445	0.222	0.486	0.146	0.074
		E1A_r60_a107	0.296	-0.05	0.002	-0.373	0.291	0.482	0.049	0.122	0.162	0.017	-0.082	-0.385	0.378	0.321	0.325	0.362	0.088
		E1A_r60_a107	0.298	0.121	0.009	-0.598	0.298	0.712	0.202	-0.002	0.027	0.021	0.036	-0.155	0.353	0.249	0.541	0.381	0.042
		E1A_r60_a107	0.316	0.556	0.028	-0.494	0.299	0.543	0.061	0.075	0.352	-0.05	0.496	0.011	0.326	0.035	0.17	0.257	0.444
		E1A_r60_a107	0.329	0.078	0.033	-0.868	0.325	0.41	0.32	-0.088	0.026	-0.01	0.27	-0.296	0.117	0.265	0.484	0.116	0.15
		E1A_r60_a107	0.375	0.104	0.063	-0.137	0.374	0.152	0.153	0.269	0.236	0.154	0.435	0.098	0.367	0.235	0.33	0.282	-0.125
		E1A_r60_a107	0.398	0.599	0.098	-0.402	0.386	0.406	0.159	0.146	0.45	0.048	0.301	0.291	0.351	0.152	0.414	0.553	-0.046
		E1A_r60_a107	0.807	-0.021	0.138	-0.346	0.562	0.249	0.138	-0.144	-0.057	-0.111	0.615	-0.247	0.291	0.238	0.313	1.54	0.111
		E1A_r60_a135	-0.093	0.329	-0.248	-0.109	-0.174	0.576	0.648	0.223	0.428	0.462	0.515	0.42	0.347	0.181	1.01	0.653	0.369
		E1A_r60_a135	-0.088	0.545	-0.139	0.17	-0.114	0.674	0.595	0.254	0.216	0.615	0.348	0.113	0.522	0.531	1.179	0.364	0.625
		E1A_r60_a135	0.003	0.374	-0.12	0.294	-0.049	0.771	0.596	0.093	0.244	0.577	0.114	0.323	0.395	0.464	1.329	0.417	0.573
		E1A_r60_a135	0.022	0.094	-0.106	0.186	0.07	0.791	0.462	0.162	0.15	0.526	0.17	0.182	0.371	0.13	1.27	0.597	0.372
		E1A_r60_a135	0.069	0.244	-0.101	-0.101	0.311	0.53	0.641	0.353	0.365	0.533	0.196	0.068	0.629	0.32	1.213	0.579	0.383
		E1A_r60_a135	0.12	0.395	-0.089	0.274	0.397	0.609	0.718	0.323	0.355	0.641	0.208	0.171	0.396	0.414	1.333	0.506	0.468
		E1A_r60_a135	0.184	0.26	-0.075	0.142	0.412	0.251	0.419	-0.044	0.292	0.494	0.588	0.343	0.425	0.311	1.248	0.425	0.421
		E1A_r60_a135	0.188	0.128	-0.072	0.047	0.42	0.666	0.683	0.156	0.159	0.442	0.382	0.033	0.597	0.241	1.314	0.365	0.499
		E1A_r60_a135	0.193	0.141	-0.03	0.16	0.422	0.769	0.681	0.117	0.133	0.589	0.576	0.196	0.547	0.34	1.301	0.268	0.269
		E1A_r60_a135	0.217	0.393	-0.023	-0.038	0.483	0.664	0.634	0.062	0.209	0.661	0.431	0.026	0.383	0.18	1.134	0.271	0.313
		E1A_r60_a135	0.247	0.17	-0.02	0.302	0.489	0.59	0.467	0.106	0.408	0.286	0.148	-0.05	0.658	0.444	0.475	0.345	0.474
		E1A_r60_a135	0.257	0.323	-0.003	0.606	0.509	0.677	0.44	0.108	0.197	0.211	0.229	0.133	0.656	0.567	0.69	0.558	0.653
		E1A_r60_a135	0.266	0.171	0.004	-0.068	0.535	0.373	0.417	0.233	0.264	0.384	0.263	0.093	0.387	0.374	0.643	0.5	0.476
		E1A_r60_a135	0.301	0.372	0.024	-0.157	0.567	0.486	0.4	0.081	0.356	0.277	0.588	0.337	0.575	0.386	0.775	0.556	0.387
		E1A_r60_a135	0.327	0.097	0.042	0.302	0.653	0.411	0.321	0.221	0.162	0.133	0.067	-0.045	0.491	0.275	0.582	0.47	0.533
		E1A_r60_a135	0.335	0.064	0.054	-0.14	0.657	0.23	0.503	0.039	0.219	0.208	0.373	0.078	0.15	0.465	0.706	0.486	0.611
		E1A_r60_a135	0.353	-0.045	0.061	-0.266	0.675	0.65	0.322	0.013	0.202	0.167	0.433	0.177	0.496	0.331	0.648	0.612	0.541
		E1A_r60_a135	0.369	-0.085	0.079	-0.282	0.706	0.372	0.459	0.237	0.429	-0.08	0.279	0.231	0.632	0.261	0.62	0.306	0.347
		E1A_r60_a135	0.373	0.574	0.111	-0.015	0.773	0.257	0.64	0.194	0.387	0.19	0.242	0.224	0.545	0.507	0.665	0.681	0.315
		E1A_r60_a135	0.415	0.29	0.115	0.032	1.014	0.568	0.383	0.78	0.302	0.236	0.364	0.269	0.544	0.461	0.162	0.55	0.445
		E1A_r60_a20	-0.725	0.151	-0.384	-0.124	-0.501	-0.038	-0.438	-0.182	-0.362	0.009	-0.372	0.109	-0.205	-0.234	-0.435	-0.471	-0.325
		E1A_r60_a20	-0.686	-0.058	-0.255	-0.565	-0.432	-0.086	-0.27	-0.204	0.168	-0.153	-0.286	0.026	-0.111	-0.073	-0.779	-0.448	-0.401
		E1A_r60_a20	-0.62	-0.174	-0.246	-0.361	-0.415	0.208	-0.653	-0.238	-0.122	0.003	-0.205	-0.14	-0.017	0.009	-0.138	-0.651	-0.052
		E1A_r60_a20	-0.503	0.288	-0.198	-0.111	-0.406	-0.025	-0.172	-0.128	0.002	-0.185	-0.249	-0.168	-0.124	0.193	-0.306	-0.306	-0.474
		E1A_r60_a20	-0.455	-0.43	-0.197	-0.269	-0.405	-0.135	-0.121	-0.413	-0.036	-0.401	-0.221	-0.003	0.083	-0.003	-0.555	-0.467	-0.313
		E1A_r60_a20	-0.361	-0.568	-0.171	-0.145	-0.399	-0.07	-0.033	-0.271	-0.341	-0.154	-0.51	-0.289	0.115	0.051	-0.477	-0.715	-0.332
		E1A_r60_a20	-0.34	0.012	-0.165	-0.033	-0.377	-0.069	-0.42	-0.134	0.056	-0.185	-0.394	0.018	-0.246	-0.324	-0.361	-0.712	-0.27
		E1A_r60_a20	-0.331	0.147	-0.144	-0.091	-0.374	-0.076	-0.217	-0.122	-0.15	-0.415	-0.21	-0.094	0.335	0.163	-0.494	-0.704	-0.229
		E1A_r60_a20	-0.267	-0.545	-0.09	0.162	-0.356	-0.292	-0.428	-0.719	0.283	-0.366	-0.49	0.102	-0.025	-0.036	-0.286	-0.557	0.02
		E1A_r60_a20	-0.13	-0.595	-0.063	-0.255	-0.305	-0.145	-0.378	-0.175	-0.111	-0.399	-0.384	0.011	0.062	0.237	-0.376	-0.529	-0.025
		E1A_r60_a20	-0.079	-0.539	-0.057	-0.675	-0.202	-0.199	-0.373	-0.244	-0.177	-0.602	-0.361	-0.155	0.175	0.276	-0.322	-0.508	-0.106
		E1A_r60_a20	-0.073	0.123	-0.035	-0.226	-0.172	-0.008	-0.645	-0.371	0.004	-0.477	-0.227	0.116	-0.196	0.03	-0.37	-0.475	0.03
		E1A_r60_a20	-0.061	-0.739	-0.012	-0.561	-0.126	0.123	-0.581	-0.67	-0.123	-0.488	-0.332	-0.187	0.325	0.264	-0.148	-0.602	-0.33
		E1A_r60_a20	-0.059	0.134	0.039	-0.435	-0.122	0.118	-0.452	-0.216	-0.149	-0.338	-0.048	-0.074	0.136	0.092	-0.775	-0.404	-0.071
		E1A_r60_a20	0.018	-0.261	0.041	-0.018	-0.117	0.033	-0.482	-0.176	-0.097	-0.251	-0.293	0.09	0.137	-0.33	-0.518	-0.437	-0.25
		E1A_r60_a20	0.059	-0.486	0.056	-0.247	-0.09	-0.055	-0.467	-0.33	-0.037	-0.483	-0.359	0.246	-0.079	-0.248	-0.174	-0.505	-0.326
		E1A_r60_a20	0.097	-0.334	0.071	-0.592	-0.083	0.007	-0.581	-0.3	-0.602	-0.243	-0.45	0.082	-0.311	0.154	-0.248	-0.429	-0.229
		E1A_r60_a20	0.102	-0.126	0.081	-0.938	-0.048	0.016	-0.486	-0.194	-0.138	-0.238	-0.192	-0.005	-0.061	-0.182	-0.658	-0.365	-0.365
		E1A_r60_a20	0.308	-0.447	0.125	-0.518	0.048	-0.196	-0.243	0.362	-0.238	-0.383	0.082	-0.06	-0.051	0.227	-0.396	-0.305	-0.235
		E1A_r60_a20	0.648	-0.173	0.164	-0.915	0.337	0.074	-0.43	-0.356	-0.219	-0.489	-0.037	-0.054	-0.261	0.002	-0.095	-0.486	-0.456
		E1A_r60_a22	-0.105	0.418	-0.286	-0.038	0.043	0.439	0.403	0.293	0.049	0.329	0.142	0.264	0.19	-0.043	1	0.252	0.225
		E1A_r60_a22	-0.06	-0.112	-0.234	0.189	0.077	0.402	0.422	0.303	0.117	0.274	-0.061	-0.077	0.295	0.222	0.73	0.322	0.438
		E1A_r60_a22	-0.042	0.123	-0.234	-0.285	0.125	0.377	0.38	0.187	0.145	0.106	0.23	-0.014	0.127	0.138	0.963	0.218	0.294
		E1A_r60_a22	-0.036	0.353	-0.21	-0.184	0.13	0.21	0.22	0.228	0.178	0.197	0.224	0.155	0.188	0.065	0.65	0.379	0.336
		E1A_r60_a22	-0.024	0.111	-0.208	-0.012	0.131	0.396	0.331	0.035	0.199	0.236	0.048	0.067	0.332	0.173	0.761	0.199	0.358
		E1A_r60_a22	-0.019	-0.01	-0.207	-0.413	0.141	0.329	0.405	0.233	0.217	0.384	-0.103	0.231	0.231	0.127	0.543	0.176	0.306
		E1A_r60_a22	-0.001	0.318	-0.2	-0.27	0.143	0.337	0.268	0.059	0.078	0.093	0.112	-0.109	0.276	0.021	0.795	0.316	0.188
		E1A_r60_a22	0.009	0.363	-0.173	0.041	0.147	0.356	0.373	0.038	0.396	0.204	0.042	0.079	0.23	0.119	0.702	0.229	0.356
		E1A_r60_a22	0.013	0.089	-0.156	0.168	0.149	0.495	0.169	0.225	0.344	0.128	-0.023	0.182	0.276	0.008	0.699	0.2	0.496
		E1A_r60_a22	0.038	0.148	-0.149	-0.142	0.159	0.387	0.216	0.183	-0.051	0.159	0.102	0.156	0.323	0.126	0.497	0.417	0.158
		E1A_r60_a22	0.039	0.309	-0.146	-0.111	0.16	0.39	0.246	-0.009	0.299	0.171	0.097	0.105	0.423	0.235	0.544	0.383	0.275
		E1A_r60_a22	0.044	0.174	-0.143	-0.153	0.183	0.407	0.249	0.049	0.045	0.235	0.202	0.076	0.337	0.176	0.577	0.206	0.364
		E1A_r60_a22	0.067	0.081	-0.14	-0.233	0.203	0.45	0.331	0.279	0.282	0.277	-0.088	0.093	0.267	0.146	0.483	0.44	0.073
		E1A_r60_a22	0.069	0.163	-0.116	-0.111	0.205	0.39	0.365	0.155	0.196	0.09	0.091	0.064	0.302	0.098	0.663	0.342	0.276
		E1A_r60_a22	0.077	0.08	-0.086	-0.245	0.228	0.368	0.251	0.063	0.074	0.237	-0.033	-0.009	0.362	0.24	0.648	0.44	0.365
		E1A_r60_a22	0.077	0.453	-0.059	-0.091	0.232	0.373	0.264	0.204	0.27	0.187	0.169	-0.005	0.246	0.134	0.687	0.373	0.446
		E1A_r60_a22	0.084	-0.072	-0.05	-0.16	0.239	0.338	0.254	0.165	0.059	-0.005	0.253	0.148	0.181	0.225	0.534	0.429	0.378
		E1A_r60_a22	0.102	0.572	-0.034	-0.298	0.246	0.542	0.261	0.429	0.332	0.097	0.24	0.282	0.202	0.205	0.779	0.371	0.052
		E1A_r60_a22	0.107	0.056	-0.028	-0.417	0.276	0.344	0.267	0.608	0.166	0.319	0.291	0.144	0.111	0.183	0.782	0.419	0.165
		E1A_r60_a22	0.141	0.219	0.018	-0.086	0.28	0.534	0.287	0.399	0.24	0.086	-0.059	0.26	0.39	0.304	0.629	0.637	0.104
		E1A_r60_a97	-0.498	0.283	-0.395	NA	-0.273	0.343	0.112	0.07	-0.083	0.633	-0.226	0.043	-0.07	-0.267	0.609	-0.018	0.071
		E1A_r60_a97	-0.317	0.138	-0.359	0.045	-0.19	-0.18	0.037	0.03	-0.118	-0.04	0.177	-0.235	-0.089	-0.298	0.598	0.21	-0.485
		E1A_r60_a97	-0.224	-0.096	-0.144	-0.232	-0.14	0.185	0.023	-0.188	0.367	0.164	-0.108	0.27	0.438	-0.46	0.301	0.239	-0.072
		E1A_r60_a97	-0.167	0.425	-0.093	-0.024	-0.082	0.152	-0.077	0.122	0.175	0.053	0.07	0.23	-0.258	0.268	0.883	0.145	-0.258
		E1A_r60_a97	-0.157	-0.232	-0.092	0.453	-0.072	0.308	-0.096	0.295	0.437	-0.011	-0.128	-0.143	-0.149	-0.416	-0.536	0.201	-0.421
		E1A_r60_a97	-0.013	-0.055	-0.084	-0.22	-0.007	0.186	0.118	0.017	-0.54	0.059	-0.247	0.099	0.21	0.009	0.462	-0.012	-0.054
		E1A_r60_a97	-0.01	0.376	-0.081	0.147	0.066	0.17	-0.325	0.824	0.369	0.155	-0.334	0.071	-0.183	-0.4	0.007	0.243	0.396
		E1A_r60_a97	0.003	-0.283	-0.028	0.034	0.142	-0.037	-0.282	-0.275	-0.261	0.26	-0.2	-0.344	0.185	0.365	0.439	0.094	NA
		E1A_r60_a97	0.069	-0.275	0.051	-0.24	0.165	0.342	-0.414	-0.269	0.332	0.136	-0.118	-0.259	0.197	0.391	-0.131	0.091	-0.028
		E1A_r60_a97	0.087	-0.114	0.052	0.517	0.19	0.246	0.2	-0.383	0.088	-0.108	-0.298	-0.182	-0.001	-0.154	0.454	0.284	-0.018
		E1A_r60_a97	0.133	0.358	0.054	-0.407	0.192	0.092	0.04	-0.306	0.395	-0.194	0.505	0.415	0.154	0.295	0.11	-0.382	-0.597
		E1A_r60_a97	0.153	-0.017	0.079	0.016	0.207	-0.086	0.577	-0.041	-0.305	-0.467	0.281	-0.421	0.176	0.38	-0.089	0.092	0.193
		E1A_r60_a97	0.244	0.423	0.081	-0.219	0.209	-0.057	-0.275	-0.411	0.205	0.075	0.124	0.315	0.225	-0.051	-0.109	-0.116	0.289
		E1A_r60_a97	0.247	0.047	0.099	0.035	0.212	0.057	0.047	-0.148	-0.019	0.04	-0.334	0.208	0.098	0.291	0.112	-0.199	0.616
		E1A_r60_a97	0.283	0.084	0.129	-0.033	0.222	0.067	-0.097	-0.419	0.398	0.342	0.637	-0.07	0.108	0.243	-0.297	0.141	-0.169
		E1A_r60_a97	0.289	-0.412	0.216	-0.427	0.347	0.288	-0.089	-0.252	-0.156	-0.363	0.178	-0.093	-0.085	0.353	-0.497	-0.032	-0.014
		E1A_r60_a97	0.302	0.044	0.216	-0.939	0.362	0.363	-0.178	-0.112	0.012	-0.24	0.54	0.161	0.239	0.187	-0.489	0.441	-0.189
		E1A_r60_a97	0.314	-0.445	0.241	-0.37	0.4	0.447	-0.119	0.147	-0.041	-0.173	0.517	0.069	0.049	0.068	-0.371	0.213	-0.499
		E1A_r60_a97	0.369	-0.071	0.245	-0.248	0.425	0.244	-0.121	-0.344	0.179	-0.009	0.367	0.057	0.074	0.009	-0.226	0.689	-0.116
		E1A_r60_a97	0.648	-0.247	NA	-0.381	0.615	0.185	-0.121	0.422	-0.063	-0.181	0.719	-0.023	0.288	0.11	1.384	0.811	0.11
		E1A_r60_n11	0.019	0.293	-0.27	0.163	0.074	0.397	0.328	0.407	-0.234	0.467	0.226	-0.122	0.43	0	0.99	-0.239	0.309
		E1A_r60_n11	0.034	0.37	-0.239	-0.035	0.246	0.586	0.09	0.249	0.214	0.472	0.174	-0.206	0.292	0.254	0.772	0.351	0.062
		E1A_r60_n11	0.064	0.483	-0.152	-0.124	0.271	0.465	0.46	0.36	0.117	0.358	0.515	0.003	0.308	0.174	0.702	0.489	-0.003
		E1A_r60_n11	0.105	0.134	-0.077	-0.355	0.308	0.308	0.522	0.553	0.666	0.345	0.088	0.035	0.284	0.176	0.75	0.537	0.302
		E1A_r60_n11	0.119	0.186	-0.006	0.343	0.326	0.678	0.373	-0.15	0.881	0.225	0.201	0.234	0.602	0.477	0.787	0.271	NA
		E1A_r60_n11	0.132	0.206	0.055	-0.067	0.339	0.526	0.426	0.329	0.106	0.635	0.223	-0.06	0.505	0.832	1.002	0.526	0.35
		E1A_r60_n11	0.143	0.188	0.067	-0.035	0.345	0.429	0.281	0.046	0.28	0.209	0.386	0.143	-0.031	0.123	0.66	0.294	0.331
		E1A_r60_n11	0.195	0.284	0.068	0.274	0.379	0.45	0.121	0.048	0.369	0.323	0.114	-0.012	0.154	0.113	0.858	0.493	0.02
		E1A_r60_n11	0.197	-0.123	0.076	-0.009	0.393	0.668	0.123	0.087	-0.063	0.343	-0.128	-0.216	0.774	0.378	0.526	0.306	0.398
		E1A_r60_n11	0.2	0.415	0.087	0.089	0.416	0.484	0.193	0.29	0.311	0.232	0.069	-0.12	0.038	0.279	0.7	0.107	0.257
		E1A_r60_n11	0.228	-0.018	0.095	0.189	0.417	0.524	-0.017	-0.03	0.116	0.041	0.162	-0.038	0.388	0.172	0.641	0.561	1.061
		E1A_r60_n11	0.251	0.073	0.099	0.125	0.472	0.477	0.382	-0.099	0.327	0.059	0.201	-0.216	-0.032	-0.269	0.288	0.236	0.853
		E1A_r60_n11	0.307	0.154	0.11	0.299	0.493	0.329	0.337	0.205	0.211	-0.287	-0.213	0.058	0.356	0.422	0.469	0.421	0.495
		E1A_r60_n11	0.327	-0.043	0.116	-0.091	0.502	0.31	0.022	0.091	-0.041	0.08	-0.423	-0.119	0.256	0.617	0.329	-0.023	0.766
		E1A_r60_n11	0.369	0.508	0.128	0.187	0.546	0.27	0.573	0.272	0.384	0.024	0.344	0.11	0.343	0.031	0.288	0.101	0.191
		E1A_r60_n11	0.372	-0.088	0.136	-0.29	0.564	0.376	-0.127	-0.106	0.432	0.04	0.584	-0.342	0.414	0.344	0.237	0.018	0.188
		E1A_r60_n11	0.411	-0.397	0.142	-0.485	0.599	0.595	0.117	0.301	0.365	0.013	0.602	-0.021	0.241	0.48	0.4	0.543	0.44
		E1A_r60_n11	0.435	0.194	0.155	0.002	0.656	0.502	0.094	0.952	0.165	-0.251	0.566	-0.012	0.2	0.798	0.241	0.618	-0.077
		E1A_r60_n11	0.462	0.271	0.193	-0.566	0.709	0.546	-0.056	0.144	0.5	-0.061	0.295	0.117	0.392	-0.004	0.697	0.462	0.102
		E1A_r60_n11	0.535	0.084	0.413	-0.047	0.886	0.35	0.102	0.239	0.114	0.018	0.484	-0.072	0.556	0.453	0.182	0.68	-0.323
		E1A_r60_n9	-0.139	-0.03	-0.288	0.01	-0.205	0.422	0.026	0.159	-0.208	0.04	-0.176	-0.766	0.202	0.098	0.357	0.173	-0.197
		E1A_r60_n9	0	0.28	-0.172	0.096	-0.175	-0.164	-0.26	0.24	0.027	-0.234	0.375	-0.51	0.322	0.169	0.486	0.167	-0.049
		E1A_r60_n9	0.048	0.195	-0.159	0.028	-0.1	0.093	-0.17	-0.189	0.166	-0.003	0.282	-0.442	0.463	-0.11	0.488	1.546	-0.096
		E1A_r60_n9	0.05	0.224	-0.067	0.122	-0.089	0.374	-0.15	0.238	0.05	0.116	-0.141	0.122	0.098	0.035	0.373	0.428	0.406
		E1A_r60_n9	0.075	0.635	0.018	0.119	-0.028	0.169	-0.019	0.404	0.472	0.061	-0.179	-0.038	-0.32	0.139	0.52	0.193	0.147
		E1A_r60_n9	0.146	-0.022	0.026	-0.164	0.028	0.158	0.055	0.108	0.191	0.098	0.178	-0.107	0.375	0.571	0.287	0.583	-0.686
		E1A_r60_n9	0.152	-0.17	0.029	-0.015	0.059	0.447	0.174	0.032	-0.065	0.061	-0.189	-0.012	0.591	0.266	-0.135	-0.068	0.161
		E1A_r60_n9	0.161	0.563	0.038	0.272	0.092	0.571	0.054	0.178	0.151	0.04	0.049	-0.024	0.116	0.206	0.528	0.022	0.147
		E1A_r60_n9	0.183	0.42	0.045	-0.104	0.093	0.333	-0.226	0.095	0.094	0.113	0.013	-0.092	-0.345	0.15	0.307	0.157	0.121
		E1A_r60_n9	0.185	0.192	0.046	0.655	0.187	0.139	0.34	0.126	0.324	-0.155	-0.094	-0.304	-0.02	0.678	0.261	0.778	0.528
		E1A_r60_n9	0.214	-0.235	0.108	0.125	0.257	0.603	0.336	-0.124	0.144	0.062	-0.011	0.016	0.284	-0.15	1.687	0.287	0.245
		E1A_r60_n9	0.241	0.014	0.112	0.054	0.338	-0.001	0.582	-0.257	0.443	-0.008	-0.168	-0.089	0.572	0.169	0.023	0.161	0.277
		E1A_r60_n9	0.28	0.274	0.132	-0.496	0.408	-0.047	0.148	-0.032	-0.397	0.059	-0.063	0.103	-0.144	0.261	0.452	0.419	0.734
		E1A_r60_n9	0.36	-0.092	0.135	0.177	0.436	0.372	0.054	-0.03	-0.34	-0.213	0.024	-0.354	0.378	0.211	-0.34	0.214	0.281
		E1A_r60_n9	0.367	0.159	0.146	-0.382	0.504	0.325	-0.176	0.231	0.158	0.005	0.719	-0.065	0.286	0.121	0.27	0.25	0.176
		E1A_r60_n9	0.368	0.13	0.171	0.173	0.557	0.276	0.04	-0.038	-0.262	-0.19	0.188	0.094	0.158	0.502	0.814	0.131	0.188
		E1A_r60_n9	0.395	-0.069	0.196	-0.129	0.604	0.36	0.203	0.424	-0.083	0.266	0.224	-0.374	0.254	0.358	0.073	0.525	0.169
		E1A_r60_n9	0.593	0.493	0.204	-0.289	0.656	0.2	0.208	0.111	0.355	-0.38	0.211	0.076	0.308	0.265	0.09	0.098	-0.499
		E1A_r60_n9	0.626	0.116	0.333	0.249	0.665	-0.163	0.283	0.474	0.006	-0.066	0.014	-0.065	0.255	-0.119	-0.116	1.82	0.055
		E1A_r60_n9	0.848	0.393	0.391	-0.644	0.835	0.185	-0.035	0.321	-0.146	0.3	-0.049	-0.501	0.232	0.033	0.209	0.234	-0.074
		EQC	-0.952	0.388	-0.56	-0.095	-0.649	-0.149	-0.042	0.161	0.691	-0.331	0.032	-0.634	0.125	-0.192	-0.067	0.257	-0.169
		EQC	-0.797	-0.531	-0.491	0.532	-0.626	0.44	-0.447	0.366	-0.397	-0.14	-0.442	0.249	-0.207	0.193	0.401	-0.588	NA
		EQC	-0.473	0.068	-0.48	-0.115	-0.532	0.375	0.141	0.08	-0.098	0.083	-0.253	-0.014	0.169	-0.087	0.822	0.123	0.001
		EQC	-0.422	0.048	-0.444	-0.177	-0.268	0.249	0.246	-0.001	-0.013	0.122	0.12	-0.055	0.009	-0.062	0.765	0.135	-0.071
		EQC	-0.329	NA	-0.427	-0.373	-0.261	-0.186	0.373	0.21	0.612	-0.87	0.235	0.143	-0.156	-0.318	0.085	-0.683	-0.849
		EQC	-0.329	NA	-0.403	-0.179	-0.202	-0.025	-0.256	-0.259	0.075	0.213	-0.358	-0.129	-0.595	-0.825	0.264	-0.137	NA
		EQC	-0.28	0.399	-0.268	-0.252	-0.155	-0.495	-0.255	0.081	0.092	-0.083	0.389	-0.303	0.123	-0.278	0.416	-0.682	-0.24
		EQC	-0.232	0.544	-0.204	0.363	-0.144	0.243	-0.701	0.012	-0.301	NA	-1.21	0.337	NA	NA	0.013	NA	NA
		EQC	-0.21	0.838	-0.178	-0.062	-0.091	0.234	-0.051	0.568	0.014	0.441	-1.091	0.052	-0.173	0.229	0.439	-0.028	0.078
		EQC	-0.19	-0.067	-0.061	-0.106	-0.082	0.121	-0.211	0.163	-0.684	0.337	-0.163	0.519	-0.086	-0.203	-0.105	-0.378	-0.027
		EQC	-0.178	0.033	-0.052	-0.289	-0.007	0.429	0.152	0.027	-0.164	0.148	0.093	-0.247	0.028	-0.201	0.547	-0.034	-0.064
		EQC	-0.139	-0.294	-0.03	0.766	-0.007	-0.073	0.003	-0.52	0.372	-0.181	-0.342	0.178	0.187	-0.318	0.015	0.219	0.353
		EQC	-0.12	0.052	-0.014	0.049	0.003	0.35	0.293	-0.116	0.008	0.217	-0.274	0.064	0.358	-0.115	0.369	0.236	0.093
		EQC	-0.088	-0.623	0.015	-0.064	0.058	-0.285	-0.308	0	-0.009	-0.436	-0.754	-0.239	0.363	-0.145	-0.428	-0.109	NA
		EQC	-0.069	0.13	0.029	-0.194	0.086	0.34	-0.686	-0.361	0.391	-0.151	-0.111	0.403	-0.366	-0.761	-0.718	-0.642	0.3
		EQC	-0.025	-0.128	0.03	-0.003	0.094	0.309	-0.004	-0.197	0.216	-0.337	-1.159	0.018	-0.018	0.055	0.297	-0.254	-0.286
		EQC	0.061	0.062	0.034	-0.665	0.108	0.389	0.138	0.027	0.087	0.135	0.068	0.061	0.073	-0.133	0.078	0.294	0.02
		EQC	0.085	0.337	0.04	-0.167	0.117	0.367	0.099	0.263	0.001	0.008	-0.108	-0.03	0.177	0.068	0.545	0.161	-0.02
		EQC	0.117	-0.195	0.055	-0.644	0.17	-0.076	-0.177	-0.024	-0.713	-0.08	0.068	0.321	-0.39	0.279	-0.05	0.102	0.153
		EQC	0.155	-0.399	0.079	-1.03	0.179	0.19	-0.096	-0.409	-0.285	-0.117	-0.032	-0.559	0.243	-0.203	0.15	-0.595	0.411
		EQC	0.172	0.231	0.148	-0.485	0.207	0.007	-0.151	0.352	0.535	0.49	-0.226	0.48	-0.366	0.157	-0.188	-0.759	-0.198
		EQC	0.206	0.076	0.15	-0.24	0.273	0.108	-0.209	0.046	-0.113	0.192	-0.358	0.526	0.065	-0.229	-0.318	0.212	-0.201
		EQC	0.208	-0.099	0.21	0.2	0.308	0.244	-0.348	0.114	-0.558	-0.246	0.036	NA	-0.389	-0.041	-0.529	-0.031	NA
		EQC	0.223	0.163	0.259	-0.447	0.467	0.124	-0.496	-0.593	0.195	0.034	-0.479	0.246	0.2	-0.524	0.472	0.156	-0.968
		ETG02_36680	0.073	0.103	-0.258	-0.51	-1.946	0.304	NA	0.219	-1.455	0.163	NA	-0.932	-1.472	-1.065	NA	NA	NA
		ETG02_36680	0.268	0.403	-0.017	-0.344	-0.933	0.051	0.004	0.06	-0.589	NA	-0.134	-0.668	-0.079	0.082	NA	-0.145	-1.317
		ETG02_36680	0.318	NA	0.086	NA	0.143	-0.139	-0.73	-0.515	-0.352	0.923	-2.686	0.12	NA	NA	NA	-0.432	NA
		ETG02_36680	0.385	0	0.102	-0.155	NA	0.271	-0.208	0.076	0.022	-0.012	0.006	0.29	-0.61	-0.586	-1.059	0.157	NA
		ETG02_36680	0.484	-0.024	0.212	0.39	NA	-0.023	-0.125	NA	-0.411	-0.146	0.748	0.205	NA	NA	-0.245	NA	NA
		ETG02_36680	NA	0.42	0.275	-0.42	NA	0.068	-0.463	0.332	0.146	-0.318	0.464	0.629	NA	0.504	NA	-0.007	-0.93
		ETG04_27747	-0.401	-0.519	0.09	0.22	-0.576	-0.114	NA	0.05	-1.25	0.282	NA	-0.325	-0.82	-0.25	0.319	-1.963	NA
		ETG04_27747	-0.298	0.205	0.111	0.171	-0.437	0.174	0.344	0.026	0.16	1.593	-0.111	-2.318	0.533	-0.602	1.352	-1.119	NA
		ETG04_27747	-0.066	0.727	0.144	0.386	-0.118	NA	0.126	0.419	0.296	NA	0.285	NA	-0.124	NA	NA	0.396	NA
		ETG04_27747	0.02	0.269	0.192	-0.428	NA	0.344	0.24	NA	-0.47	NA	-0.139	0.18	-0.663	1.233	0.291	0.712	NA
		ETG04_27747	NA	-0.334	0.204	-0.384	NA	0	-0.173	NA	NA	0.245	NA	-0.433	NA	-1.099	-0.473	-2.048	0.698
		ETG04_27747	NA	-0.166	0.294	NA	NA	-0.473	-0.106	0.094	NA	-0.839	NA	0.298	NA	-0.721	0.497	NA	NA
		ETG05_36762	-0.152	0.03	-0.103	-1.244	-0.073	-0.09	1.336	-1.386	0.364	-0.317	-0.92	NA	NA	-0.627	-0.504	0.215	0.4
		ETG05_36762	-0.016	-0.59	0.06	0.04	-0.042	-0.672	NA	-0.091	0.863	NA	-0.92	NA	NA	NA	0.725	NA	NA
		ETG05_36762	0.001	0.71	0.079	-0.048	-0.019	-0.475	-0.997	0.165	0.151	0.812	0.601	-1.85	-0.279	0.242	-0.694	0.048	1.597
		ETG05_36762	0.097	0.021	0.168	-0.269	0.431	0.843	-0.094	-0.462	-0.216	-0.424	-0.74	0.497	-0.511	-0.04	-0.218	2.39	-1.879
		ETG05_36762	0.103	0.394	0.18	-0.3	2.091	-0.365	NA	0.59	-0.172	0.209	-1.318	0.157	NA	0.737	NA	0.132	1.236
		ETG05_36762	0.116	-0.572	0.18	-0.237	NA	0.327	-0.014	0.694	-1.097	-0.316	0.92	-0.544	-1.035	-0.747	-0.41	2.151	-0.687
		ETG05_66023	-0.19	0.064	0.039	0.184	-0.945	0.272	0.077	-0.165	-0.55	0.009	NA	-1.041	-0.601	-1.584	0.867	0.023	-0.109
		ETG05_66023	-0.061	-0.152	0.057	0.559	-0.64	1.621	1.812	1.042	0.227	0.314	-1.448	-1.916	-0.44	0.217	NA	NA	-0.009
		ETG05_66023	0.096	0.212	0.149	0.53	-0.073	0.233	1.277	NA	2.978	0.31	-1.05	0.2	NA	-0.09	4.13	0.54	1.719
		ETG05_66023	0.195	NA	0.157	-0.029	NA	0.688	0.028	0.38	NA	0.659	NA	0.332	NA	0.497	-0.956	0.52	0.066
		ETG05_66023	0.277	-0.112	0.223	-0.134	NA	0.113	-0.923	NA	NA	0.698	NA	0.248	-0.497	NA	-0.359	-1.396	NA
		ETG05_66023	NA	0.005	0.24	NA	NA	NA	-0.093	-0.477	-1.005	NA	0.171	0.425	NA	NA	0.35	0.827	NA
		ETG07_105829	-0.749	0.391	-0.311	-0.393	-0.844	0.163	-0.419	-0.501	-0.813	-0.196	-0.092	-0.368	-0.842	-0.663	-0.653	-1.231	-0.737
		ETG07_105829	-0.457	0.195	-0.149	-0.096	-0.51	-0.484	0.226	0.058	-0.268	-0.391	-0.337	-0.449	-0.152	0.006	0.446	0.093	0.018
		ETG07_105829	-0.136	-0.853	0.045	0.638	-0.238	0.007	-0.033	-0.681	0.417	-0.055	-0.212	0.23	-0.467	-0.744	0.125	-0.688	-0.004
		ETG07_105829	0.043	0.061	0.068	0.089	-0.071	-0.123	0.374	-0.421	0.064	-0.258	-1.448	0.339	-0.288	0.031	-1.435	-0.637	0.308
		ETG07_105829	0.201	-0.357	0.268	-0.403	0.104	-0.059	-0.253	0.137	-0.505	0.073	-0.667	0.334	0.112	-0.097	0.092	-0.117	0.34
		ETG07_105829	0.288	NA	0.456	-1.293	0.529	-0.199	-0.175	NA	-0.486	0.002	0.36	-0.761	-0.198	-0.322	0.395	-0.006	-0.646
		ETG08_142674	-0.272	0.49	-0.158	0.317	0.152	0.048	-0.797	0.458	-0.95	0.024	-0.609	-1.68	-1.909	-0.831	NA	0.393	NA
		ETG08_142674	-0.162	NA	0.015	0.174	0.692	NA	NA	NA	-0.141	NA	0.111	-1.972	NA	NA	NA	NA	NA
		ETG08_142674	-0.063	0.03	0.042	0.658	1.078	NA	NA	NA	0.099	NA	-1.068	-0.184	NA	NA	-0.812	NA	NA
		ETG08_142674	0.078	0	0.048	0.395	NA	0.059	0.144	-0.983	-0.005	0.387	-0.027	0.415	0.532	0.29	0.028	-1.396	0.69
		ETG08_142674	0.578	-0.431	0.049	0.893	NA	0.359	0.315	NA	NA	-0.45	0.475	-0.502	-0.766	NA	NA	NA	NA
		ETG08_142674	NA	0.467	0.278	0.058	NA	-0.314	-0.528	-0.052	-0.306	-0.937	0.017	-0.303	-0.622	-0.318	-0.484	0.22	NA
		ETG09_205211	-0.266	0.479	0.003	0.271	-0.006	-0.101	0.298	0.299	-2.384	0.676	-1.554	-0.84	-1.324	-0.466	-0.501	-0.616	NA
		ETG09_205211	-0.073	-0.233	0.131	0.238	0.016	-0.299	0.338	-0.696	-0.189	NA	-1.221	NA	NA	0.705	NA	NA	NA
		ETG09_205211	-0.048	-0.107	0.194	0.453	1.097	-0.027	-0.091	0.018	0.369	-0.756	-1.411	1.017	NA	-0.753	-0.209	-0.473	0.305
		ETG09_205211	0.142	-0.327	0.263	0.616	NA	0.29	-0.333	NA	0.781	NA	NA	0.178	NA	NA	0.006	NA	NA
		ETG09_205211	0.262	0.21	0.324	-0.583	NA	-0.086	-0.177	-0.099	-0.158	0.113	0.132	0.384	-0.511	-2.659	-0.681	0.14	-0.576
		ETG09_205211	NA	NA	0.505	0.873	NA	0.557	-0.395	-0.087	-0.834	-0.287	0.469	0.284	-0.06	0.049	-0.043	-0.765	0.158
		ETG09_35454	-0.495	0.164	-0.078	0.469	-2.314	0.344	NA	0.252	0.672	0.252	-0.535	NA	-0.922	NA	1.335	0.474	1.13
		ETG09_35454	0.034	NA	-0.075	0.433	-0.769	NA	NA	NA	0.687	NA	-2.339	NA	NA	NA	NA	NA	NA
		ETG09_35454	0.245	0.062	0.01	0.718	0.037	NA	NA	NA	0.729	1.055	-0.932	0.484	NA	NA	NA	NA	NA
		ETG09_35454	NA	0.013	0.159	0.247	NA	0.181	-0.176	-0.918	-0.231	-1.274	-0.074	0.288	-1.038	-1.53	NA	0.806	-0.139
		ETG09_35454	NA	0.012	0.228	-0.134	NA	-0.373	NA	1.982	NA	NA	NA	0.41	NA	NA	-0.681	NA	0.541
		ETG09_35454	NA	-0.241	0.407	0.261	NA	0.078	0.556	NA	-0.33	-0.009	0.946	0.292	NA	NA	NA	NA	NA
		ETG09_48764	-0.35	0.213	-0.228	0.087	-0.441	-0.196	-0.014	0.73	-0.001	0.145	0.357	-0.344	0.286	-0.163	0.318	0.093	-0.73
		ETG09_48764	-0.271	0.433	-0.227	-0.17	-0.206	0.67	0.591	0.57	0.328	0.05	0.113	0.098	0.093	-0.415	0.61	0.012	-1.054
		ETG09_48764	-0.216	-0.027	0.018	0.358	-0.056	0.449	0.352	0.691	0.893	0.254	0.224	0.169	0.006	0.697	0.179	-0.139	-0.395
		ETG09_48764	-0.215	0.163	0.107	-0.662	-0.037	0.719	0.41	-0.232	-0.448	-0.213	0.192	-0.174	0.347	0.171	0.452	-0.142	0.269
		ETG09_48764	0.239	0.178	0.127	-0.237	0.035	0.184	0.249	-0.199	-0.641	-0.066	-1.022	0.15	0.917	0.04	0.466	NA	-0.229
		ETG09_48764	0.44	-0.452	0.141	0.027	0.223	-0.123	-0.109	-0.04	-0.268	-0.4	0.218	0.525	-0.834	0.225	0.131	0.316	NA
		ETG10_13482	-0.347	NA	-0.285	NA	-0.947	NA	NA	NA	0.284	NA	NA	NA	NA	NA	NA	0.607	NA
		ETG10_13482	-0.239	NA	0.116	0.311	-0.159	NA	0.417	0.644	0.728	NA	-0.405	0.703	NA	0.247	NA	0.764	NA
		ETG10_13482	-0.155	0.559	0.18	0.478	-0.066	NA	NA	0.386	0.098	1.285	-0.609	-0.155	0.094	NA	NA	0.316	NA
		ETG10_13482	-0.025	-0.447	0.239	-0.319	0.21	-0.402	0.144	NA	-1.658	-0.516	0.318	-0.292	-0.61	-0.316	-0.2	-0.174	0.011
		ETG10_13482	0.555	-0.253	0.272	0.391	NA	-0.179	0.015	0.656	0.211	-0.195	0.109	0.137	0.042	NA	1.649	-0.554	-2.028
		ETG10_13482	NA	0.283	0.35	-0.045	NA	-0.053	0.5	0.116	-0.47	-0.647	-0.324	0.325	-0.344	-0.376	NA	-1.976	0.145
		ETG10_195139	-0.244	-0.009	-0.151	0.275	-0.476	-0.147	-0.447	0.168	0.109	-0.723	0.124	0.325	0.379	-1.068	-0.446	0.896	-0.331
		ETG10_195139	-0.07	-0.142	-0.016	0.216	-0.007	0.193	0.069	0.332	0.283	0.235	-0.337	0.036	-0.298	0.032	0.397	-0.433	0.209
		ETG10_195139	0.045	-0.241	0.111	0.198	0.143	0.376	0.017	0.095	0.689	0.176	-0.698	0.36	-0.484	-1.2	-0.672	-1.153	-0.227
		ETG10_195139	0.055	0.195	0.191	-0.836	0.327	-0.032	0.108	0.345	0.194	0.088	-1.629	-0.44	1.178	-0.649	0.64	0.049	0.587
		ETG10_195139	0.278	0.482	0.214	0.183	0.467	-0.067	0.286	0.326	-0.173	0.44	-0.268	0.237	-0.178	-0.305	0.023	NA	-0.017
		ETG10_195139	0.319	-0.184	0.268	-0.096	NA	-0.541	-0.065	-0.319	0.149	-0.149	0.677	0.292	-0.411	-0.484	0.147	-0.099	-0.843
		ETG10_234183	-0.038	0.384	-0.209	0.152	-0.088	0.211	-0.004	0.603	-0.161	0.534	0.005	-0.11	0.013	-0.046	1.068	-0.066	0.262
		ETG10_234183	0.048	0.357	-0.158	0.022	-0.038	0.094	0.148	0.379	-0.076	-0.051	0.094	-0.223	-0.007	-0.153	0.577	-0.078	-0.25
		ETG10_234183	0.076	0.107	-0.142	0.45	0.105	-0.101	0.265	-0.189	0.619	-0.094	-0.666	-0.14	0.358	0.242	0.079	0.223	-0.213
		ETG10_234183	0.157	0.024	-0.123	-0.265	0.218	0.318	0.064	-0.099	-0.082	0.019	0.382	0.111	0.328	0.074	0.388	-0.039	0.202
		ETG10_234183	0.211	-0.176	0.005	-0.505	0.229	0.317	-0.047	-0.334	-0.26	-0.093	0.248	0.108	0.092	-0.025	-0.179	-0.248	-0.196
		ETG10_234183	0.263	0.034	0.078	-0.174	0.297	0.093	0.017	-0.153	-0.082	-0.137	0.486	0.209	0.308	0.114	0.18	0.269	-0.125
		ETG10_236652	-0.74	0.295	-0.438	-0.178	-0.555	0.189	-0.723	0.407	-0.482	0.324	-0.205	-0.044	0.111	-0.178	-0.929	0.554	-0.135
		ETG10_236652	-0.51	0.125	-0.387	0.303	-0.361	0.227	-0.605	-0.191	-0.236	0.043	-0.649	-0.394	0.287	0.46	0.552	0.48	-0.65
		ETG10_236652	-0.152	0.174	-0.142	-0.806	-0.34	0.495	0.418	-0.815	-0.37	-0.694	-0.325	-0.163	-0.088	0.019	0.409	-0.334	-0.328
		ETG10_236652	-0.147	-0.248	-0.1	0.229	-0.168	0.43	0.174	-0.585	0.394	-0.082	-0.583	-0.12	-0.309	-0.411	0.127	0.119	-0.538
		ETG10_236652	-0.068	-0.233	0.204	-0.431	0.125	0.226	-0.374	-0.426	-0.097	-0.753	-0.823	-0.698	-0.342	0.226	-0.619	-0.164	-0.085
		ETG10_236652	0.225	-0.142	0.249	-1.062	0.249	0.288	-0.638	-0.901	NA	0.181	NA	0.375	0.266	NA	1.216	NA	-0.331
		GE_BrightCorner	0.273	0.132	0.125	0.167	0.328	0.066	0.404	0.168	0.114	0.347	-0.089	0.063	0.144	0.146	-0.986	-0.785	-1.059
		GE_BrightCorner	0.281	0.195	0.141	0.144	0.337	0.035	0.392	0.156	0.119	0.357	-0.069	0.086	0.076	0.085	-1.112	-0.753	-1.127
		GE_BrightCorner	0.282	0.08	0.169	0.226	0.378	0.039	0.42	0.053	0.215	0.311	0.142	0.163	0.087	0.079	-1.092	-0.718	-1.036
		GE_BrightCorner	0.284	0.139	0.179	0.165	0.395	0.006	0.497	0.189	0.084	0.32	-0.097	0.002	0.05	0.117	-1.019	-0.751	-1.173
		GE_BrightCorner	0.296	0.097	0.19	0.252	0.395	0.079	0.358	0.071	0.139	0.282	0.162	0.153	0.108	0.043	-1.115	-0.681	-1.201
		GE_BrightCorner	0.382	0.177	0.194	0.113	0.399	0.09	0.399	0.152	0.095	0.327	-0.017	-0.213	0.065	0.094	-1.118	-0.736	-1.164
		GE_BrightCorner	0.406	0.163	0.201	0.157	0.404	0.068	0.361	0.155	0.094	0.3	-0.028	-0.123	0.081	0.118	-1.103	-0.687	-1.059
		GE_BrightCorner	0.436	0.088	0.206	0.193	0.409	0.067	0.353	0.485	0.146	0.213	0.158	0.115	0.152	0.067	-1.132	-0.687	-1.123
		GE_BrightCorner	0.437	0.133	0.219	0.17	0.416	-0.002	0.387	0.064	0.089	0.47	0.158	0.129	0.171	0.117	-1.227	-0.827	-1.102
		GE_BrightCorner	0.472	0.058	0.253	0.202	0.439	0.015	0.356	0.083	0.123	0.455	0.203	-0.066	0.22	0.202	-1.256	-0.701	-1.131
		GE_BrightCorner	0.497	0.061	0.288	0.178	0.443	0.086	0.349	0.173	0.266	0.273	0.18	0.133	0.125	0.109	-1.136	-0.474	-1.115
		GE_BrightCorner	0.506	-0.006	0.291	0.199	0.451	0.042	0.314	0.072	0.165	0.458	0.168	-0.013	0.13	0.171	-1.213	-0.602	-1.146
		GE_BrightCorner	0.528	0.008	0.313	0.171	0.481	0.054	0.372	0.042	0.124	0.456	0.162	-0.017	0.148	0.125	-1.219	-0.629	-1.068
		GE_BrightCorner	0.563	0.068	0.379	0.195	0.499	0.065	0.377	0.203	0.285	0.255	0.192	0.19	0.074	0.11	-1.25	-0.506	-1.104
		NegativeControl	-1.094	0.181	-0.379	1.092	-2.757	0.431	NA	-0.484	-0.123	-0.596	-0.323	-0.57	-0.763	-0.564	NA	1.448	NA
		NegativeControl	-0.78	0.437	-0.272	0.595	-1.872	NA	-0.619	0.401	-3.046	0.985	-0.489	-0.057	2.987	-0.851	NA	NA	NA
		NegativeControl	-0.616	0.396	-0.265	0.641	-1.442	-0.21	NA	0.637	NA	1.192	NA	NA	-0.185	NA	3.45	0.247	NA
		NegativeControl	-0.565	0.897	-0.257	0.237	-1.234	0.971	NA	0.078	-2	-0.035	NA	-1.191	0.068	-1.735	0.255	-0.114	-0.687
		NegativeControl	-0.478	0.321	-0.248	0.695	-0.672	0.223	-0.76	0.099	-0.911	0.086	0.593	NA	NA	-0.804	NA	-0.372	-0.308
		NegativeControl	-0.227	0.49	-0.247	-0.136	-0.612	NA	NA	0.609	NA	NA	NA	NA	NA	NA	NA	NA	NA
		NegativeControl	-0.201	0.492	-0.205	0.221	-0.442	-0.043	0.765	-0.42	-2.479	1.706	-0.951	-1.286	-1.162	-2.186	-0.921	-0.192	NA
		NegativeControl	-0.193	0.593	-0.192	0.361	-0.341	-1.408	1.431	-0.376	-0.556	0.536	-0.027	0.147	-0.202	-0.747	1.836	0.065	-1.799
		NegativeControl	-0.187	0.569	-0.182	-0.017	-0.317	-0.157	-0.494	1.093	-1.036	NA	-0.074	NA	-0.263	-1.016	NA	0.761	-0.105
		NegativeControl	-0.175	0.165	-0.149	0.047	-0.311	1.689	NA	0.879	0.335	1.455	NA	NA	NA	NA	NA	NA	NA
		NegativeControl	-0.172	0.677	-0.089	0.825	-0.256	NA	NA	-1.215	2.157	NA	NA	-0.74	-0.783	NA	NA	-0.579	NA
		NegativeControl	-0.172	0.72	-0.051	0.749	-0.146	0.051	NA	-0.014	-0.125	NA	NA	NA	NA	NA	NA	-1.268	NA
		NegativeControl	-0.169	2.913	-0.034	NA	-0.077	NA	NA	0.224	0.394	NA	0.589	NA	NA	NA	NA	NA	NA
		NegativeControl	-0.144	1.447	-0.014	0.068	0.097	0.106	0.885	0.33	-0.054	NA	-1.626	0.659	-2.677	-0.403	-0.466	0.903	-2.625
		NegativeControl	-0.107	-0.218	-0.006	NA	0.119	NA	NA	0.808	0.306	NA	-0.313	0.127	NA	-2.808	NA	-1.821	NA
		NegativeControl	-0.071	-2.434	0.003	0.392	0.419	NA	NA	0.464	-0.341	0.834	-0.259	-1.468	-0.013	1.253	NA	-0.229	-0.475
		NegativeControl	-0.053	0.705	0.007	0.306	0.473	NA	-0.365	0.654	NA	0.363	NA	NA	-1.4	NA	NA	-0.869	NA
		NegativeControl	-0.051	0.207	0.011	0.713	0.48	-2.066	NA	0.847	0.864	NA	0.166	NA	NA	NA	NA	NA	NA
		NegativeControl	-0.045	0.247	0.011	0.875	0.491	NA	NA	-0.374	NA	0.425	NA	NA	NA	NA	NA	NA	NA
		NegativeControl	-0.024	0.682	0.024	-0.076	0.564	0.916	0.652	NA	NA	-0.531	NA	NA	NA	NA	NA	-0.321	-0.843
		NegativeControl	-0.023	NA	0.026	0.287	0.806	0.736	NA	NA	0.411	NA	-1.905	NA	2.248	NA	NA	1.131	NA
		NegativeControl	-0.004	0.583	0.029	0.258	1.017	0.826	0.777	0.468	0.364	0.805	NA	NA	-0.269	NA	NA	-0.554	NA
		NegativeControl	0	0.439	0.034	0.555	1.237	-0.139	0.124	NA	NA	0.743	4.784	NA	NA	-1.065	NA	NA	NA
		NegativeControl	0.013	NA	0.035	-0.08	1.237	0.415	-0.39	NA	0.302	NA	-0.566	-1.347	0.522	-1.516	0.496	-0.041	NA
		NegativeControl	0.021	1.02	0.04	-0.034	NA	-0.085	NA	-0.589	-2	1.013	0.935	-0.48	-1.472	NA	NA	-0.526	-1.507
		NegativeControl	0.031	NA	0.04	NA	NA	NA	0.29	1.1	0.395	NA	NA	0.588	NA	NA	NA	NA	NA
		NegativeControl	0.04	0.836	0.055	0.887	NA	NA	NA	0.779	0.625	NA	NA	0.202	NA	NA	NA	-0.554	NA
		NegativeControl	0.094	0.719	0.06	0.134	NA	NA	-0.103	-1.767	0.153	0.18	-0.094	NA	-1.868	0.888	NA	NA	NA
		NegativeControl	0.098	0.332	0.063	0.681	NA	0.662	-0.099	-0.514	0.047	0.4	-0.777	NA	0.709	-0.951	NA	-1.445	NA
		NegativeControl	0.11	NA	0.064	0.588	NA	NA	-0.17	0.832	0.598	NA	-1.476	-0.101	NA	-0.115	NA	NA	NA
		NegativeControl	0.113	0.753	0.074	0.2	NA	-0.061	-0.234	-1.441	-0.603	NA	0.144	-1.05	-2.077	-0.086	NA	NA	NA
		NegativeControl	0.116	0.104	0.1	0.392	NA	0.374	0.307	-0.096	-0.191	NA	-0.74	-2.057	-0.634	1.783	NA	-0.226	NA
		NegativeControl	0.132	0.514	0.103	0.041	NA	NA	NA	NA	0.783	NA	-1.178	-0.23	0.168	0.265	NA	NA	NA
		NegativeControl	0.158	NA	0.115	0.144	NA	-1.481	0.18	-0.413	-0.108	NA	-1.318	0.255	-1.642	NA	NA	NA	0.162
		NegativeControl	0.163	NA	0.12	0.536	NA	1.547	0.156	NA	0.7	0.848	-0.36	-0.199	-2.677	-0.387	0.942	-0.11	0.379
		NegativeControl	0.183	0.115	0.129	NA	NA	0.109	0.839	NA	0.253	0.613	0.804	0.646	NA	-0.904	NA	-1.144	NA
		NegativeControl	0.202	0.796	0.129	0.586	NA	0.139	-0.42	-0.058	0.367	0.396	0.1	-0.125	NA	-1.687	NA	NA	NA
		NegativeControl	0.207	-0.031	0.134	0.018	NA	NA	1.396	-1.211	NA	NA	NA	-0.91	NA	-0.003	NA	NA	NA
		NegativeControl	0.216	NA	0.139	0.516	NA	NA	0.901	-0.712	0.625	NA	-2.974	0.525	NA	-0.811	NA	NA	-0.568
		NegativeControl	0.28	0.49	0.141	0.443	NA	NA	NA	NA	0.152	NA	-1.384	0.318	NA	-0.001	-0.404	0.848	NA
		NegativeControl	0.307	NA	0.149	0.518	NA	NA	0.571	-0.681	0.244	NA	-0.533	-0.003	NA	NA	NA	NA	0.394
		NegativeControl	0.318	NA	0.156	0.124	NA	0.108	NA	-0.387	0.181	NA	-2.686	-0.591	NA	0.419	NA	NA	0.652
		NegativeControl	0.324	NA	0.159	0.427	NA	-0.704	0.434	NA	-0.834	-1.159	NA	0.291	-0.868	0.181	NA	-0.873	0.108
		NegativeControl	0.325	-0.397	0.167	-0.386	NA	NA	NA	NA	0.453	NA	NA	0.154	NA	-0.127	-0.359	NA	NA
		NegativeControl	0.359	NA	0.168	0.285	NA	NA	NA	NA	0.573	NA	-2.261	-0.089	NA	NA	NA	NA	NA
		NegativeControl	0.361	0.854	0.177	0.458	NA	-0.439	NA	NA	0.365	-0.245	-0.668	0.291	NA	NA	NA	0.033	NA
		NegativeControl	0.389	0.593	0.18	0.484	NA	NA	-1.094	NA	-0.709	NA	-1.25	0.096	NA	NA	-0.404	NA	NA
		NegativeControl	0.395	0.708	0.184	1.293	NA	NA	NA	NA	0.876	NA	NA	-0.078	-0.453	NA	NA	NA	NA
		NegativeControl	0.419	0.487	0.187	0.431	NA	0.103	NA	NA	-0.03	NA	NA	0.174	-1.742	-0.104	NA	-0.38	NA
		NegativeControl	0.466	1.109	0.189	0.286	NA	0.578	0.147	NA	-0.134	-1.538	-1.902	-0.079	-0.401	0.336	NA	-0.062	-0.005
		NegativeControl	0.505	0.524	0.201	0.311	NA	0.515	-0.33	0.003	0.192	0.038	-0.941	0.508	-0.736	0.053	-0.551	-0.02	-0.787
		NegativeControl	0.561	NA	0.211	0.211	NA	0.4	-0.447	NA	-0.156	1.021	-0.067	0.396	-0.67	-0.115	0.863	-0.412	-0.411
		NegativeControl	0.592	-0.428	0.223	0.021	NA	NA	0.071	-1.483	0.254	NA	-1.629	0.534	-0.67	-0.683	NA	NA	NA
		NegativeControl	0.623	0.928	0.232	0.309	NA	NA	NA	NA	-1.25	NA	0.294	0.366	NA	NA	NA	NA	-0.31
		NegativeControl	0.653	NA	0.237	0.273	NA	NA	NA	NA	NA	NA	NA	-0.659	NA	NA	NA	NA	NA
		NegativeControl	0.805	NA	0.258	-0.326	NA	-0.157	0.06	NA	NA	0.131	NA	-0.622	NA	NA	NA	-0.8	0.158
		NegativeControl	NA	0.539	0.261	NA	NA	-0.285	NA	0.309	NA	NA	NA	0.419	NA	NA	NA	0.174	NA
		NegativeControl	NA	0.535	0.265	NA	NA	-0.555	0.457	0.744	0.934	-0.048	0.669	0.798	-0.68	-1.057	-0.856	NA	NA
		NegativeControl	NA	NA	0.283	NA	NA	NA	NA	NA	NA	NA	NA	NA	NA	NA	NA	NA	NA
		NegativeControl	NA	1.152	0.286	0.113	NA	NA	NA	-0.147	-0.81	0.918	-1.789	-0.167	NA	-0.831	0.142	NA	1.102
		NegativeControl	NA	NA	0.287	0.505	NA	0.027	0.41	NA	-0.33	0.024	0.062	0.292	-0.998	NA	-0.381	NA	NA
		NegativeControl	NA	0.905	0.293	0.575	NA	0.564	NA	0.785	NA	0.657	NA	0.87	-1.642	0.695	0.63	-0.938	-0.485
		NegativeControl	NA	0.381	0.303	-0.042	NA	0.192	0.1	-0.833	-2.22	0.167	NA	-0.12	NA	-0.021	NA	-1.724	NA
		NegativeControl	NA	NA	0.316	NA	NA	0.011	1.27	-0.441	-2.49	-0.44	0.791	-0.414	NA	0.04	NA	NA	NA
		NegativeControl	NA	NA	0.319	0.618	NA	0.595	0.523	-0.042	-0.9	NA	-0.457	0.813	-0.636	-0.376	-1.133	0.172	NA
		NegativeControl	NA	0.089	0.343	-1.049	NA	-0.556	0.387	0.321	NA	0.034	NA	0.441	-0.336	-0.062	-1.758	-1.286	-0.485
		NegativeControl	NA	0.357	0.35	0.987	NA	0.057	-0.331	0.563	-0.76	NA	0.047	0.483	-1.424	-0.153	0.63	-2.659	NA
		NegativeControl	NA	NA	0.35	0.469	NA	NA	-0.202	1.114	NA	NA	NA	-0.693	NA	0.056	NA	NA	-0.028
		NegativeControl	NA	2.721	0.369	0.059	NA	0.507	-0.46	NA	0.415	NA	0.569	0.516	0.88	1.256	NA	NA	NA
		NegativeControl	NA	NA	0.439	0.741	NA	0.555	-0.419	-0.252	-1.803	NA	1.12	-0.274	NA	-0.403	0.351	0.252	0.309
		NegativeControl	NA	0.332	0.556	-0.208	NA	-0.684	-0.593	-0.716	-0.164	-0.368	-0.207	0.549	0.068	-1.927	NA	1.264	-2.009
		NegativeControl	NA	NA	0.69	0.171	NA	0.818	-0.086	-0.018	-0.541	0.462	0.382	0.497	NA	-0.951	NA	0.841	-2.916
		NegativeControl	NA	NA	0.749	0.425	NA	0.742	0.634	NA	0.42	0.509	0.717	-0.308	NA	-0.9	-0.197	1.005	NA
		NegativeControl	NA	NA	0.894	0.783	NA	NA	0.066	NA	NA	NA	NA	-0.338	NA	NA	NA	1.175	-0.795
		NegativeControl	NA	NA	0.954	NA	NA	-2.312	-1.148	-1.115	-0.047	NA	0.042	0.175	NA	NA	-0.794	1.368	-1.432
		NegativeControl	NA	1.045	NA	0.741	NA	0.255	0.38	1.172	-0.812	NA	0.417	0.424	-1.217	-0.168	0.63	NA	-0.587
		NegativeControl	NA	0.683	NA	0.296	NA	-0.212	0.298	0.091	-2.036	-0.247	0.669	-0.806	-1.641	-0.713	NA	-0.873	-0.816
		orf19.10	-0.142	1.015	-0.107	0.837	-0.122	0.376	2.3	0.554	0.823	1.664	0.879	0.301	0.769	0.662	2.425	0.636	0.701
		orf19.10	0.002	0.52	-0.054	0.918	0.464	-0.302	2.274	0.818	1.288	1.849	1.046	0.298	1.182	0.858	2.188	0.758	0.274
		orf19.10	0.138	1.515	-0.016	1.519	0.664	0.547	2.728	1.267	1.586	2.822	1.394	0.349	1.443	1.142	2.751	1.203	1.053
		orf19.10	0.321	0.706	0.154	1.35	0.784	0.153	2.652	1.381	1.555	2.761	1.365	0.225	2.101	1.058	2.609	1.251	0.72
		orf19.10	0.454	1.289	0.427	1.514	NA	0.158	2.849	1.413	1.642	3.127	1.575	0.291	1.616	1.211	2.848	1.235	0.826
		orf19.100	-0.26	-0.307	-0.02	0.029	-0.063	0.107	0.231	-0.653	-0.429	-0.119	-0.572	-0.043	-0.415	-0.248	-1.125	-1.205	-0.786
		orf19.100	-0.124	0.174	0.268	-0.336	0.08	-0.11	-0.095	0.094	-0.407	-0.779	-0.284	0.146	NA	-0.081	NA	-0.722	-0.31
		orf19.1002	-0.241	0.003	-0.212	-0.032	-0.744	-0.006	0.2	0.544	0.157	0.221	0.169	0.102	0.254	0.19	-0.123	0.12	0.692
		orf19.1002	0.282	-0.128	0.054	-0.197	-0.13	-0.184	0.107	-0.129	0.061	0.09	0.299	-0.166	0.081	-0.145	-0.274	0.978	0.355
		orf19.1005	0.095	0.168	-0.066	0.104	0.25	0.394	-0.011	-0.282	0.109	0.338	0.248	0.051	0.13	0.016	-0.92	-0.083	-0.651
		orf19.1005	0.226	-0.183	-0.007	-0.105	0.653	0.197	-0.065	-0.111	-0.245	0.059	0.125	-0.012	0.267	0.307	-0.313	0.028	-0.244
		orf19.1007	-0.33	0.385	-0.116	0.124	-0.241	-0.028	0.409	0.636	0.217	0.197	0.32	0.029	0.285	0.147	1.148	0.522	0.848
		orf19.1007	-0.244	0.104	-0.11	0.096	-0.098	0.022	0.301	0.302	0.179	0.067	0.21	-0.111	0.39	0.178	0.991	0.651	0.993
		orf19.1007	-0.212	-0.219	0.045	-0.353	0.005	0.074	-0.003	0.13	0.086	-0.045	-0.087	-0.175	0.23	0.078	1.054	0.49	0.66
		orf19.1007	0.007	0.171	0.123	0.116	0.171	0.136	0.409	0.27	0.319	0.32	0.374	-0.067	0.283	0.011	0.964	0.623	0.987
		orf19.1007	0.141	0.272	0.164	0.235	0.224	0.171	0.459	0.654	0.489	0.328	0.478	0.271	0.469	0.208	1.207	0.858	1.102
		orf19.1008	0.165	-0.381	-0.14	-0.522	0.164	0.066	0.421	0.027	-0.982	0.265	0.45	-0.449	-0.746	-0.865	-0.228	-0.639	-0.39
		orf19.1008	0.598	0.433	-0.099	0.169	0.307	-0.303	0.254	0.263	-0.123	0.229	0.317	0.185	0.472	-0.193	-0.19	-0.123	1.095
		orf19.1009	-0.275	0.252	0.035	0.209	-0.071	-0.165	0.412	-0.03	0.234	0.159	0.196	0.205	0.333	-0.147	0.576	0.204	0.759
		orf19.1009	-0.095	0.201	0.2	-0.428	-0.001	-0.336	0.126	0.448	-0.05	0.148	1.038	0.117	0.362	0.346	0.237	0.106	1.575
		orf19.101	-0.117	-0.252	-0.329	-0.184	-0.092	-0.088	-0.323	-0.766	-0.159	-0.478	-0.57	-0.114	-0.518	-0.427	-1.507	-1.275	-0.919
		orf19.101	0.163	-0.165	0.048	0.136	0.149	0.018	-0.061	-0.163	-0.053	-0.395	-0.272	0.298	-0.275	-0.241	-1.48	-0.638	-0.596
		orf19.1010	-0.153	-0.073	0.08	0.216	-0.164	-0.223	-0.228	0.103	0.118	-0.097	-0.279	-0.109	0.041	0.013	0.419	0.513	0.187
		orf19.1010	-0.153	-0.133	0.09	0.13	-0.077	-0.165	-0.246	-0.002	0.12	-0.003	0.036	0.001	0.154	0.096	0.361	0.422	0.01
		orf19.1011	-0.133	0.039	-0.015	0.096	-0.078	0.056	0.029	-0.103	0.106	-0.006	0.087	0.037	-0.119	0.107	0.187	0.535	-0.292
		orf19.1011	-0.014	-0.142	0.101	-0.141	0.094	0.049	-0.069	-0.146	-0.203	-0.125	-0.118	-0.133	-0.06	0.004	0.181	0.592	-0.3
		orf19.1012	-0.301	0.01	-0.272	-0.022	-0.248	-0.1	-0.037	-0.196	0.277	-0.179	-0.082	-0.113	-0.014	-0.058	0.48	1.499	-0.161
		orf19.1012	0.051	-0.042	-0.012	-0.182	0.209	-0.025	-0.236	0.036	0.214	-0.362	0.083	-0.004	-0.054	-0.158	0.303	1.68	-0.296
		orf19.102	-0.022	NA	0.187	0.524	0.188	NA	NA	NA	0.754	NA	NA	-0.086	NA	0.05	0.446	0.271	NA
		orf19.102	0.035	0.059	0.35	-0.503	NA	-0.388	-0.28	-0.159	0.389	0.041	0.177	0.108	-0.615	-0.469	0.536	NA	0.419
		orf19.1026	-0.44	0.296	-0.137	0.08	-0.472	0.141	-0.123	0.348	-0.025	0.043	0.322	0.191	0.084	0.073	-0.265	-0.673	-0.255
		orf19.1026	-0.007	-0.176	-0.006	-0.449	0.135	0.02	-0.813	-0.183	-0.333	-0.67	0.019	-0.299	-0.259	-0.395	-0.681	-1.008	-0.846
		orf19.1027	-0.337	-0.316	-0.014	-0.543	-0.172	0.01	0.365	0.004	0.017	0.369	0.008	-0.138	0.171	-0.007	0.682	0.755	1.995
		orf19.1027	0.303	-0.117	0.012	-0.511	0.149	-0.272	0.485	0.22	0.105	0.495	0.365	0.012	0.214	0.031	0.466	0.766	2.284
		orf19.1028	-0.666	-0.325	-0.231	-0.052	-0.342	0.008	-0.143	-0.103	-0.04	-0.045	-0.193	-0.162	-0.066	-0.027	-0.413	-0.835	-0.52
		orf19.1028	-0.484	-0.433	0.077	-0.2	-0.212	-0.287	-0.579	-0.462	-0.138	-0.332	-0.231	-0.259	-0.36	-0.186	-0.587	-0.952	-0.881
		orf19.1029	-0.224	-0.129	0.018	-0.361	-0.108	-0.153	-0.487	-0.189	-0.216	-0.242	-0.126	-0.197	-0.201	-0.312	-0.47	-1.276	-0.757
		orf19.1029	-0.07	0.039	0.049	0.022	0.285	0.054	-0.196	0.277	-0.072	-0.003	0.455	0.151	0.07	0.038	-0.369	-0.743	-0.554
		orf19.103	-0.584	0.014	0.123	-0.175	-0.461	-0.25	0.574	0.354	0.631	1.481	1.301	-0.121	0.361	0.373	2.488	2.676	3.997
		orf19.103	-0.37	-0.616	0.152	0.169	0.045	0.467	-0.086	-0.876	0.071	0.786	0.781	-0.391	-0.207	0.384	1.576	1.669	3.03
		orf19.1030	0.01	0.224	-0.032	0.027	0.055	0.164	-0.363	0.052	-0.206	-0.208	0.031	-0.044	-0.283	-0.198	-0.307	-0.853	-1.048
		orf19.1030	0.199	0.151	-0.031	-0.111	0.216	0.07	-0.633	0.157	-0.366	-0.352	0.027	-0.012	-0.217	-0.23	-0.463	-0.929	-0.936
		orf19.1031	-0.096	0.003	-0.119	-0.209	-0.177	0.059	-0.498	0.051	-0.258	-0.518	-0.047	-0.003	-0.199	-0.1	-0.393	-0.213	-0.166
		orf19.1031	0.254	0.404	0.265	0.449	NA	0.327	NA	0.17	0.109	NA	0.217	0.116	NA	NA	0.394	0.135	0.13
		orf19.1032	-0.098	-0.379	-0.001	-0.406	-0.181	-0.209	-0.061	0.3	0.084	-0.161	0.147	0.087	0.292	0.095	0.16	-0.024	0.28
		orf19.1032	0.093	-0.063	0.112	0.099	0.254	0.248	0.22	0.289	0.334	0.107	0.453	0.429	0.591	0.352	0.591	0.07	0.411
		orf19.1033	-0.039	-0.135	-0.135	-0.316	0.027	-0.062	-0.028	0.002	-0.199	-0.229	-0.111	-0.034	-0.19	-0.165	0.347	0.276	-0.215
		orf19.1033	0.046	0.067	0.038	-0.081	0.174	0.049	0.143	-0.266	-0.184	-0.043	-0.048	0.145	-0.246	-0.158	0.466	0.261	0.102
		orf19.1034	-0.167	-0.216	-0.098	-0.106	-0.173	-0.137	-0.226	-0.397	-0.325	-0.393	-0.608	-0.186	-0.105	-0.128	0.003	0.43	-0.966
		orf19.1034	0.044	-0.113	0.096	-0.122	-0.126	0.163	-0.154	-0.753	-0.257	-0.431	-0.562	-0.136	-0.214	-0.172	0.044	0.524	-1.184
		orf19.1035	-0.11	-0.066	-0.355	-0.288	-0.075	-0.073	0.17	0.014	-0.095	0.037	-0.179	0.031	-0.079	0.026	-0.255	-0.884	-0.364
		orf19.1035	0.027	-0.242	-0.256	-0.189	-0.071	-0.066	0.062	0.025	-0.148	-0.024	-0.085	0.016	0.007	-0.026	-0.365	-0.933	-0.23
		orf19.1036	0.107	-0.043	-0.01	0.224	-0.082	-0.131	0.74	0.406	0.646	0.533	0.473	-0.162	0.533	0.398	0.709	1.207	0.982
		orf19.1036	0.396	0.032	0.206	0.155	0.008	-0.089	0.696	0.638	0.606	0.688	0.664	-0.008	0.717	0.517	0.663	1.351	0.809
		orf19.1037	0.291	0.226	0.151	0.306	0.054	0.206	0.247	-0.055	0.185	0.159	-0.046	-0.123	0.066	-0.013	0.254	1.291	-1.387
		orf19.1037	0.322	0.404	0.242	0.072	0.175	0.384	0.276	-0.187	-0.026	0.281	-0.037	0.02	0.128	0.158	0.297	1.339	-1.385
		orf19.1037	0.48	0.226	0.25	0.235	0.343	0.285	0.425	-0.207	-0.08	0.381	0.21	-0.073	0.156	0.102	0.568	1.513	-1.286
		orf19.1037	0.536	0.374	0.365	0.155	0.355	0.153	0.283	-0.103	0.047	0.452	0.215	-0.212	0.217	0.037	0.225	1.267	-1.597
		orf19.1037	0.596	-0.114	0.373	0.039	0.376	0.004	0.1	0.03	0.105	0.05	0.056	-0.207	0.123	-0.019	0.165	1.728	-1.712
		orf19.1039	0.213	-0.254	0.085	0.111	0.136	-0.081	-0.03	-0.182	-0.223	-0.08	0.267	0.048	-0.064	0.073	0.61	0.677	0.611
		orf19.1039	0.355	-0.204	0.188	-0.146	0.184	-0.222	-0.355	-0.311	-0.192	-0.124	0.164	-0.106	-0.39	-0.149	0.311	0.363	0.116
		orf19.104	-0.302	0.471	0.047	-0.284	0.722	NA	0.798	-3.525	0.08	1.572	-2.261	0.403	-0.548	1.317	NA	-0.436	0.638
		orf19.104	0.168	NA	0.054	NA	1.257	-0.625	NA	NA	0.542	-0.671	0.857	0.375	NA	-0.043	NA	NA	NA
		orf19.1040	-0.008	0.062	0.079	-0.484	-0.054	-0.289	-0.447	-0.515	-0.657	-0.654	-0.366	-0.019	-0.51	-0.516	0.069	0.229	-0.393
		orf19.1040	0.258	0.268	0.269	0.228	0.632	0.075	0.25	0.491	-0.064	0.102	0.164	0.07	-0.094	0.245	0.485	0.982	0.15
		orf19.1041	0.059	0.223	-0.117	-0.052	0.156	0.029	-0.132	-0.021	0.305	-0.25	-0.106	-0.165	-0.217	-0.158	-0.025	-0.372	-0.439
		orf19.1041	0.133	0.043	0.06	-0.22	0.237	-0.061	-0.507	-0.442	-0.199	-0.371	-0.238	-0.283	-0.452	-0.432	-0.158	-0.572	-0.702
		orf19.1042	-0.262	-0.271	-0.256	-0.088	-0.214	NA	0.127	0.051	0.188	0.011	-0.114	0.086	0.081	0.056	0.168	0.145	0.363
		orf19.1042	NA	NA	NA	NA	NA	NA	NA	NA	NA	NA	NA	NA	NA	NA	0.694	0.554	NA
		orf19.1043	0.104	-0.154	-0.132	-0.015	0.028	-0.139	-0.127	-0.231	-0.182	-0.481	-0.481	-0.214	-0.393	-0.257	-0.072	-0.476	-0.448
		orf19.1043	0.163	-0.796	-0.031	-0.569	0.39	-0.159	-0.371	-0.718	-0.493	-0.438	-0.704	-0.676	-0.395	-0.556	-0.848	-0.677	-0.82
		orf19.1045	-0.684	0.004	-0.003	-0.083	-0.012	-0.142	-0.633	-0.06	-0.066	-0.276	0.022	0.064	-0.264	0.129	-0.488	-0.764	-1.011
		orf19.1045	-0.479	-0.138	0.032	-0.363	0.029	-0.121	-0.634	0.032	-0.462	-0.525	0.177	0.109	-0.34	-0.057	-0.708	-0.69	-0.725
		orf19.1047	0.057	0.112	0.013	-0.032	0.169	0.226	-0.116	0.063	0.01	0.007	0.341	-0.15	0.059	0.011	0.195	-0.205	-0.511
		orf19.1047	0.061	0.052	0.015	-0.519	0.179	0.123	-0.537	-0.559	-0.523	-0.663	-0.354	-0.255	-0.77	-0.6	-0.894	-1.501	-1.741
		orf19.1048	0.437	0.035	0.17	0.239	0.297	0.096	-0.254	-0.341	-0.136	-0.147	-0.347	-0.035	-0.254	-0.233	-2.308	-1.724	-1.155
		orf19.1048	0.439	0.014	0.255	0.193	0.549	0.212	-0.312	-0.187	-0.025	-0.207	-0.215	0.192	-0.104	-0.064	-1.909	-0.83	-1.311
		orf19.1049	0.013	0.008	0.093	-0.482	-0.211	0.034	-0.342	0.121	-0.162	-0.187	0.053	-0.153	0.008	-0.227	-0.322	0.334	0.4
		orf19.1049	NA	-0.359	0.192	-0.026	-0.202	0.04	-0.228	-0.377	0.025	-0.436	-0.068	-0.28	-0.087	0.126	-0.076	1.081	0.075
		orf19.105	-0.252	-0.093	-0.081	-0.266	-0.403	0.177	-0.094	-0.287	-0.33	-0.326	-0.412	-0.093	-0.466	-0.236	-0.618	-1.041	-0.228
		orf19.105	0.146	-0.602	0.12	-0.559	0.226	-0.38	-0.454	-0.638	-0.375	-0.407	-0.526	-0.442	-0.446	-0.25	-0.927	-0.907	-0.077
		orf19.1050	-0.192	-0.008	-0.146	-0.468	-0.128	-0.246	-0.461	-0.512	-0.455	-0.55	-0.248	-0.199	-0.504	-0.368	0.401	0.116	-0.354
		orf19.1050	0.244	-0.007	-0.071	0.195	0.066	-0.074	-0.487	-0.548	-0.581	-0.418	-0.113	-0.098	-0.382	-0.05	0.532	0.201	-0.485
		orf19.1051	-0.001	NA	-0.016	0.137	0.032	NA	-2.053	-0.951	-1.273	-2.113	-1.324	-0.657	-1.299	-0.571	-1.476	-0.848	-2.739
		orf19.1051	0.139	NA	0.117	NA	0.153	NA	NA	-0.942	-1.267	NA	-1.36	-0.726	-1.233	-0.604	-1.451	-0.752	NA
		orf19.1051	0.245	-0.051	0.128	-0.118	0.225	NA	-2.443	-1.254	-1.247	-2.354	-1.44	-0.756	-1.377	-0.751	-1.841	-0.858	-2.793
		orf19.1051	NA	-0.032	NA	-0.06	NA	NA	-2.298	-1.19	-1.345	-2.227	-1.469	-0.719	-1.375	-0.728	-1.757	-0.857	-2.591
		orf19.1051	NA	-0.475	NA	-0.669	NA	-0.095	-2.603	-1.366	-1.489	-2.583	-1.382	-0.825	-1.59	-0.775	-2.184	-0.858	-2.896
		orf19.1052	NA	NA	NA	NA	0.338	NA	-2.253	-1.114	-1.245	-2.242	-1.362	-0.559	-1.309	-0.543	-1.83	-0.795	-2.829
		orf19.1052	NA	NA	NA	0.046	NA	NA	-2.1	-0.876	-1.278	-2.083	-1.17	-0.428	-1.295	-0.576	-1.613	-0.769	-2.649
		orf19.1053	0.063	-0.097	-0.093	-0.004	-0.143	-0.117	-0.092	-0.485	-0.188	-0.06	-0.379	-0.315	-0.375	-0.326	0.339	0.258	-0.569
		orf19.1053	0.145	-0.076	0.047	0.032	-0.118	-0.048	-0.123	-0.08	-0.164	-0.055	-0.099	-0.1	-0.111	-0.163	0.363	0.301	-0.163
		orf19.1054	-0.031	-0.028	-0.07	0.204	-0.02	-0.065	0.342	0.028	0.101	0.098	0.113	0.094	0.047	-0.03	-0.263	-0.247	0.42
		orf19.1054	0.055	-0.318	0.015	-0.177	-0.014	-0.167	0.031	-0.14	-0.065	-0.056	-0.235	-0.12	0.067	-0.079	-0.41	-0.378	0.431
		orf19.1055	0.025	0.2	0.021	0.202	-0.037	-0.086	0.191	0.25	0.26	-0.055	0.361	0.026	0.202	0.191	1.291	2.889	0.621
		orf19.1055	0.168	0.526	0.186	0.372	0.097	0.042	0.279	0.113	0.168	-0.017	0.088	-0.099	0.125	0.219	1.689	2.76	0.578
		orf19.1057	0.062	0.089	-0.032	0.255	0.085	-0.004	0.331	-0.021	0.002	0.194	-0.032	-0.006	0.231	0.061	0.722	1.155	0.155
		orf19.1057	0.068	0.225	0.11	0.126	0.338	0.455	0.632	0.068	0.239	0.281	0.129	0.103	0.329	0.254	0.7	1.005	0.551
		orf19.1058	-0.119	0.019	-0.168	-0.001	-0.127	-0.104	0.242	0.329	0.402	0.057	0.33	0.207	0.214	0.191	0.108	0.888	0.685
		orf19.1058	0.103	-0.026	0.075	0.187	0.075	0.13	0.375	0.333	0.126	0.503	0.24	0.128	0.384	0.116	0.377	0.918	0.58
		orf19.1059	-0.118	-0.344	-0.089	-0.218	-0.026	NA	-2.063	-0.96	-1.111	-2.176	-1.189	-0.653	-1.218	-0.569	-1.679	-0.471	-2.763
		orf19.1059	NA	NA	NA	NA	NA	NA	-1.829	-0.79	-1.163	-1.874	-1.056	-0.368	-1.18	-0.557	-1.445	-0.266	NA
		orf19.1060	0.417	-0.109	0.127	0.032	0.515	0.177	0.13	0.006	-0.077	0.149	-0.219	0.155	-0.158	0.079	0.681	0.601	-0.248
		orf19.1060	NA	NA	0.299	0.252	NA	NA	NA	NA	2.252	NA	NA	1.066	NA	NA	NA	NA	NA
		orf19.1061	0.004	-0.215	-0.021	-0.116	-0.009	NA	-2.344	NA	-1.324	-2.216	-1.096	-0.457	-1.293	-0.711	-1.749	-0.681	NA
		orf19.1061	NA	NA	NA	NA	NA	NA	-2.772	-1	-1.577	-2.673	-1.405	-0.404	-1.544	-0.645	-2.19	-1.052	-4.289
		orf19.1062	0.393	0.674	0.12	0.114	-0.208	0.877	0.648	0.591	0.222	0.431	0.257	0.27	0.477	0.56	1.542	0.346	0.31
		orf19.1062	0.687	0.513	0.273	-0.111	0.991	0.154	0.611	0.685	-0.606	0.181	0.538	-0.304	0.176	0.354	0.085	-0.412	-0.766
		orf19.1063	0.108	-0.03	0.139	0.119	0.118	0.107	-0.312	-0.032	0.49	-0.282	-0.201	-0.219	-0.217	-0.35	-0.689	-0.598	0.122
		orf19.1063	0.169	-0.128	0.24	-0.205	0.257	-0.049	-0.036	0.016	0.038	-0.007	-0.135	-0.218	0.168	-0.061	-0.124	-0.249	0.065
		orf19.1064	-0.182	-0.102	-0.221	0.003	-0.238	NA	-0.29	-0.212	-0.368	-0.463	-0.313	-0.261	-0.204	-0.19	0.711	1.814	-0.229
		orf19.1064	-0.182	-0.117	-0.062	-0.027	-0.087	0.196	-0.298	-0.305	-0.444	-0.304	-0.135	-0.08	-0.068	-0.1	0.801	1.886	-0.011
		orf19.1065	NA	NA	NA	NA	NA	NA	0.167	0.155	0.047	0.25	0.098	0.083	NA	0.102	-0.79	-0.027	0.024
		orf19.1065	NA	NA	NA	NA	NA	NA	0.277	0.076	0.109	0.221	0.196	0.131	0.076	0.045	-0.674	-0.021	-0.021
		orf19.1066	0.112	0.002	0.175	0.002	-0.164	0.216	-0.207	-0.014	0.254	-0.005	0.038	-0.25	0.404	0.144	1.488	1.264	-0.016
		orf19.1066	0.217	0.346	0.297	0.177	0.229	0.173	0.32	0.14	0.401	0.263	0.63	0.068	0.495	0.356	1.691	1.831	0.311
		orf19.1067	-0.154	-0.075	-0.24	0.038	-0.32	0.161	0.032	-0.285	-0.131	-0.065	-0.517	0.142	-0.227	-0.045	-0.756	-1.028	-0.829
		orf19.1067	0.222	-0.503	-0.02	-0.582	0.229	-0.292	-0.453	-0.664	-0.448	-0.57	-0.838	-0.161	-0.294	-0.293	-1.349	-1.308	-1.35
		orf19.1069	-0.153	-0.275	-0.025	-0.199	0.021	-0.135	-0.161	0.023	0.096	-0.062	0.132	-0.058	-0.073	-0.149	-1.35	-1.614	0.352
		orf19.1069	-0.087	-0.058	-0.007	-0.11	0.13	-0.045	0.015	0.086	-0.007	-0.006	0.117	-0.057	0.068	-0.049	-1.074	-1.37	0.225
		orf19.107	-0.446	0.08	-0.456	-0.022	-0.275	0.106	-0.477	0.012	-0.124	-0.141	-0.009	0.05	-0.011	-0.004	-0.282	-0.745	-0.87
		orf19.107	0.037	-0.232	-0.029	-0.655	0.108	-0.208	-1.171	0.029	-0.047	-0.531	-0.433	-0.288	-0.539	-0.482	-0.535	-1.204	-1.371
		orf19.1070	-0.156	-0.168	-0.116	-0.179	-0.001	-0.278	-0.104	-0.402	-0.461	-0.504	-0.535	-0.01	-0.381	-0.111	-0.068	-0.173	0.243
		orf19.1070	0.449	0.377	0.113	0.131	0.378	0.122	0.467	-0.077	0.049	0.112	-0.192	0.044	0.066	0.108	0.564	0.379	0.421
		orf19.10708	-0.517	0.898	0.037	0.451	1.587	1.688	1.051	0.594	1.109	0.47	0.288	0.099	1.011	1.179	0.574	-0.096	-0.365
		orf19.10708	1.48	0.51	0.316	-0.802	NA	0.078	0.885	-0.109	-1.441	-0.486	-0.559	0.407	-0.411	-0.082	-0.188	-1.396	-0.771
		orf19.10709	-0.987	0.345	0.161	-0.946	-0.081	0.227	0.035	-0.131	0.097	0.313	0.107	0.379	0.141	-0.326	-0.414	0.883	0.231
		orf19.10709	0.026	0.184	0.165	0.265	NA	0.331	-0.814	0.401	0.393	-0.435	-0.094	-0.078	0.047	-0.484	0.302	0.651	-0.096
		orf19.10711	-0.157	-0.2	-0.04	-0.195	-0.606	-0.103	-0.17	0.366	-0.362	-0.704	-0.034	-0.582	-0.635	-0.728	-0.359	-0.589	-2.166
		orf19.10711	0.119	0.477	-0.016	-0.238	0.148	-0.022	0.68	-0.249	0.012	0.791	0.116	-1.276	-1.806	0.566	-0.921	0.474	NA
		orf19.10711	0.203	-0.011	-0.006	0.096	1.047	-0.046	0.468	0.143	0.204	0.374	-0.035	-0.221	0.369	0.212	0.508	0.301	0.277
		orf19.10711	0.349	0.353	0.117	0.328	1.413	0.748	1.001	0.485	0.776	0.816	0.596	0.111	1.059	0.567	1.338	0.768	0.594
		orf19.10711	0.704	NA	0.269	0.555	NA	0.076	-0.463	-0.197	NA	0.54	NA	-1.148	-0.808	NA	NA	0.393	-0.256
		orf19.10712	-0.28	0.334	-0.172	0.454	-0.001	0.724	0.023	0.325	0.196	0.316	-0.319	-1.618	-1.605	-0.627	0.082	-0.192	0.698
		orf19.10712	-0.146	0.775	-0.002	0.334	0.362	0.346	0.338	0.671	0.725	NA	0.645	-0.218	0.059	0.939	0.284	NA	0.359
		orf19.10712	0.044	0.796	0.033	0.027	0.956	-0.439	-0.795	NA	0.994	-0.433	NA	-0.714	NA	-0.084	NA	-0.036	0.466
		orf19.10712	0.587	0.09	0.11	0.24	NA	0.87	0.417	0.104	0.181	0.32	0.251	0.063	0.579	0.377	0.82	0.592	0.249
		orf19.10712	0.599	-0.461	0.261	-0.11	NA	0.155	0.056	-0.143	-0.114	-0.594	0.63	0.247	-0.375	-0.168	-0.863	0.493	-0.309
		orf19.10713	0.173	-0.332	-0.007	0.199	-0.1	0.063	0.089	-0.197	0.685	-0.643	-0.579	0.038	-0.735	0.338	0.188	0.38	-0.328
		orf19.10713	0.425	-0.106	0.028	-0.033	0.097	0.126	-0.211	-0.05	NA	-0.159	NA	0.542	0.015	0.246	-0.181	0.445	0.476
		orf19.1075	-0.118	0.136	0.074	-0.055	0.215	0.11	-0.516	-0.437	-0.587	-1.047	-0.476	-0.224	-0.828	-0.227	-2.349	-3.022	-0.339
		orf19.1075	0.125	0.17	0.168	0.215	0.39	0.285	-0.324	-0.414	-0.304	-0.507	-0.526	-0.014	-0.518	-0.211	-1.638	-2.156	-0.358
		orf19.1077	-0.433	-0.35	-0.236	-0.3	-0.62	-0.252	-0.157	-0.624	-0.282	-0.14	-0.423	-0.153	-0.629	-0.288	-0.342	-0.268	0.166
		orf19.1077	-0.325	-0.293	0.029	-0.217	-0.045	-0.473	-0.155	-0.507	-0.264	-0.087	-0.517	-0.329	-0.544	-0.301	-0.194	-0.265	0.16
		orf19.1078	0.036	-0.397	0.031	-0.111	-0.246	-0.087	-0.001	-0.401	-0.048	-0.109	-0.361	-0.314	0.094	-0.123	-0.651	-0.831	-0.465
		orf19.1078	0.333	-0.013	0.122	-0.006	0.247	0.047	0.206	-0.126	0.194	0.152	-0.013	0.001	0.2	0.173	-0.527	-0.276	-0.22
		orf19.1080	-0.104	-0.432	-0.062	-0.135	-0.404	-0.034	-0.69	-0.044	-0.084	-0.289	-0.114	-0.139	-0.159	0.49	-0.448	-0.053	1.129
		orf19.1080	0.302	-0.113	-0.006	0.55	-0.175	0.232	-0.548	-0.531	-0.009	-0.194	-0.724	-0.027	-0.08	-0.121	-0.527	0.14	0.881
		orf19.1082	-0.655	-0.04	-0.459	-0.188	-0.581	-0.257	-0.922	-0.091	-0.181	-0.541	0.199	0.106	-0.78	-0.229	-0.276	-0.585	-0.867
		orf19.1082	-0.084	-0.656	-0.4	-0.059	-0.27	-0.319	-0.935	-0.124	-0.126	-0.515	-0.012	-0.208	-0.529	-0.157	-0.324	-0.9	-1.047
		orf19.1082.1	-0.042	0.185	-0.031	0.189	-0.115	0.097	0.195	0.033	0.098	0.152	-0.051	0.151	0.078	0.027	1.013	0.978	-0.285
		orf19.1082.1	0.121	0.168	0	0.087	0.106	-0.024	-0.026	-0.029	-0.049	0.05	-0.159	0.051	0.076	0.027	1.023	0.958	-0.434
		orf19.1083	-0.189	0.099	-0.177	-0.213	0.051	-0.014	-0.39	0.061	0.052	-0.338	0.381	0.024	-0.096	0.006	-0.355	-0.133	-0.906
		orf19.1083	0.022	0.162	0.085	0.353	0.126	0.085	-0.059	0.433	0.093	0.108	0.442	0.333	0.285	0.241	0.064	-0.106	-0.806
		orf19.1084	-0.337	-0.033	-0.385	-0.323	-0.418	-0.052	-0.183	-0.115	-0.271	-0.35	-0.181	-0.217	-0.411	-0.249	-0.307	-0.205	-0.259
		orf19.1084	-0.201	-0.363	-0.13	-0.472	-0.225	-0.265	-0.421	-0.562	-0.28	-0.457	-0.355	-0.359	-0.204	-0.338	-0.506	-0.237	-0.38
		orf19.1085	0.069	-0.133	-0.118	-0.098	-0.036	-0.046	0.054	0.033	0.106	0.057	-0.041	-0.152	0.02	0.013	-0.077	0.117	-0.013
		orf19.1085	0.199	-0.234	0.036	-0.277	0.153	-0.025	-0.022	-0.198	0.137	-0.013	-0.133	-0.106	0.157	0.001	-0.102	-0.038	0.155
		orf19.1086	-0.056	0.172	0.146	0.1	-0.098	0.147	0.112	0.247	-0.019	0.025	0.266	0.225	0.089	0.131	0.253	0.349	0.092
		orf19.1086	-0.017	-0.012	0.15	0.155	0.164	-0.042	-0.185	0.095	-0.042	-0.047	0.253	0.092	0.054	0.125	0.173	0.149	-0.044
		orf19.1087	-0.499	0.041	-0.085	-0.073	-0.282	0.003	-0.02	-0.103	0.267	0.05	-0.03	-0.087	-0.194	-0.068	-0.242	-0.548	-0.417
		orf19.1087	0.041	-0.071	0.016	-0.169	0.22	-0.072	-0.173	0.209	-0.226	-0.149	0.127	0.07	-0.064	0.075	-0.546	-0.444	-0.372
		orf19.1089	0.159	-0.408	-0.004	-0.286	0.057	-0.15	-0.217	-0.411	-0.191	-0.255	-0.384	-0.184	-0.116	-0.258	-0.413	-0.683	-0.093
		orf19.1089	0.298	-0.209	0.104	-0.179	0.152	0.076	-0.122	-0.255	-0.296	-0.003	-0.148	-0.188	-0.213	-0.419	-0.141	-0.868	-0.506
		orf19.109	0.029	0.07	-0.133	0.14	-0.158	0.03	-0.065	0.024	0.074	0.125	0.048	0.144	-0.046	0.044	-0.468	-0.512	-0.337
		orf19.109	0.052	0.135	0.004	0.06	0.13	-0.09	0.063	0.162	-0.042	-0.05	-0.043	0.202	-0.02	-0.009	-0.151	-0.789	-0.291
		orf19.1090	-0.185	-0.959	0.194	0.202	-1.001	-0.714	-1.471	-0.941	-0.004	-1.099	-0.724	-0.918	-1.204	-0.625	-1.73	-2.793	-2.168
		orf19.1090	-0.13	0.122	0.235	-0.33	0.081	-0.674	-1.001	-0.579	-0.51	-1.131	-0.327	0.053	-0.665	0.231	-2.361	-3.036	-1.503
		orf19.1091	-0.765	-0.217	-0.455	-0.517	-0.304	-0.27	-1.239	-0.195	-0.449	-0.641	-0.013	-0.149	-0.53	-0.299	-0.644	-1.345	-1.379
		orf19.1091	-0.017	-0.157	-0.236	-0.177	-0.208	-0.073	-0.983	0.046	-0.357	-0.424	-0.093	-0.082	-0.245	-0.052	-0.587	-1.153	-1.022
		orf19.1092	-0.05	-0.386	-0.087	-0.072	0.147	0.032	-0.251	-0.46	-0.07	-0.181	-0.176	-0.35	-0.132	-0.081	-0.076	0.085	-0.134
		orf19.1092	0.204	0.017	0.122	0.047	0.191	0.113	-0.122	-0.275	-0.137	-0.064	-0.217	-0.183	-0.012	-0.075	0.135	0.151	0.129
		orf19.1093	-0.232	-0.116	-0.141	-0.053	-0.185	-0.136	-0.205	-0.155	-0.054	-0.245	-0.281	-0.144	-0.234	-0.07	-0.266	-0.457	-0.206
		orf19.1093	0.01	-0.052	-0.016	0.033	0.144	-0.059	-0.057	-0.209	-0.093	-0.087	-0.055	0.038	-0.206	-0.019	-0.061	-0.395	0.061
		orf19.1095	-0.167	-0.077	-0.228	-0.077	-0.134	0.027	-0.342	0.126	-0.069	-0.318	0.108	-0.083	-0.232	-0.135	-0.283	0.052	-0.429
		orf19.1095	0.144	0.077	-0.157	-0.054	0.143	-0.012	-0.155	0.099	0.086	-0.146	-0.112	-0.199	-0.155	-0.221	0.017	-0.24	-0.539
		orf19.1096	-0.179	0.146	-0.181	-0.138	-0.081	0.113	0.055	-0.002	0.09	0.024	0.143	0.108	-0.047	-0.028	0.232	0.31	-0.381
		orf19.1096	0.086	-0.458	-0.061	-0.415	0.34	-0.083	-0.459	-0.645	-0.297	-0.361	-0.551	-0.356	-0.365	-0.385	-0.411	-0.547	-0.445
		orf19.1097	NA	NA	NA	NA	NA	NA	NA	NA	NA	NA	NA	NA	NA	NA	NA	NA	-0.558
		orf19.1097	NA	NA	NA	NA	NA	NA	NA	NA	NA	NA	NA	NA	NA	NA	NA	NA	-0.075
		orf19.11	-0.364	0.097	-0.13	-0.082	-0.001	-0.196	0.597	0.131	0.252	0.126	0.19	0.313	0.438	0.285	-0.334	-0.957	-0.06
		orf19.11	0.302	-0.426	0.172	0.095	0.113	-0.184	0.508	0.092	0.016	0.466	-0.322	0.097	0.545	0.342	-0.625	-1.443	-0.353
		orf19.1105	-0.201	0.637	0.083	0.102	-0.601	0.019	-0.136	0.442	0.113	-0.209	0.081	0.314	-0.187	-0.014	-0.049	-0.02	-0.06
		orf19.1105	-0.013	-0.368	0.364	0.255	0.007	-0.35	-0.302	-0.591	0.935	0.289	-0.362	-0.413	-0.05	-0.349	-0.405	-0.188	-0.508
		orf19.1105.2	NA	NA	NA	NA	NA	NA	NA	NA	NA	NA	NA	NA	NA	NA	NA	NA	NA
		orf19.1105.2	NA	NA	NA	NA	NA	NA	NA	NA	NA	NA	NA	NA	NA	NA	NA	NA	NA
		orf19.1105.3	-0.124	-0.787	0.33	-0.134	NA	1.055	NA	0.737	NA	NA	NA	NA	NA	NA	NA	NA	NA
		orf19.1105.3	0.008	0.206	0.421	0.768	NA	NA	NA	0.792	NA	NA	NA	NA	NA	NA	NA	NA	NA
		orf19.1106	-1.512	-0.889	-0.566	-0.297	-0.82	0.161	-1.606	0.14	-0.302	-0.269	-0.489	0.202	-0.704	-0.519	-0.353	-0.494	-0.689
		orf19.1106	-0.824	-0.988	-0.541	-1.023	-0.67	-0.702	-1.113	-1.181	-0.618	-0.858	-0.838	-0.645	-1.451	-0.824	-0.907	-1.424	-1.597
		orf19.1106	0	-1.011	-0.115	0.038	-0.161	NA	NA	-0.477	-0.701	-1.006	-1.509	-0.113	-0.103	0.333	NA	-2.041	-0.417
		orf19.1106	0.146	-0.424	-0.101	0.054	NA	-0.26	-0.889	-0.891	-0.043	-1.175	-0.267	-0.135	-0.085	0.303	-0.281	-0.138	-0.061
		orf19.1106	0.265	NA	0.063	0.305	NA	0.083	-0.492	0.776	-1.776	-0.779	0.635	-0.078	NA	-0.305	NA	NA	-1.162
		orf19.1107	-0.168	-0.054	-0.048	0.073	-0.24	-0.003	0.201	-0.047	0.081	0.167	0.031	0.059	-0.064	-0.057	0.355	-0.291	0.423
		orf19.1107	-0.147	-0.161	0.002	0.088	-0.13	-0.237	-0.03	-0.194	-0.061	0.032	-0.228	-0.025	-0.192	-0.02	0.226	-0.604	0.723
		orf19.1107	-0.033	-0.252	0.033	-0.074	0.117	-0.012	-0.125	-0.467	-0.171	-0.101	-0.359	-0.166	-0.274	-0.187	0.257	-0.75	0.194
		orf19.1107	0.041	0.112	0.038	0.243	0.17	-0.002	0.318	-0.078	0.11	0.228	-0.264	0.122	-0.04	0.125	0.491	-0.439	0.556
		orf19.1107	0.138	-0.269	0.242	-0.152	0.34	-0.106	-0.078	-0.54	-0.36	0.021	-0.224	-0.178	-0.133	-0.096	0.312	-0.656	0.272
		orf19.1108	-0.237	-0.146	-0.235	-0.383	-0.111	-0.06	-0.397	-0.279	-0.279	-0.343	-0.307	-0.115	-0.569	-0.273	-0.243	-0.2	-0.85
		orf19.1108	0.068	-0.143	-0.167	-0.053	0.033	0.054	-0.299	-0.472	-0.338	-0.057	-0.323	-0.096	-0.337	-0.214	-0.198	-0.098	-0.764
		orf19.1109	-0.995	-0.324	-0.356	-0.404	-0.684	-0.186	-0.85	-0.366	-0.504	-0.723	-0.459	-0.279	-0.455	-0.181	-0.673	-0.748	-0.423
		orf19.1109	-0.796	-0.401	-0.202	-0.51	-0.599	-0.156	-0.919	-0.472	-0.516	-0.779	-0.373	-0.073	-0.333	-0.233	-0.65	-0.71	-0.515
		orf19.111	0.194	0.307	-0.036	0.178	-0.106	0.103	-0.085	0.14	0.158	0.426	-0.323	0.334	-0.035	0.137	0.928	-0.335	-0.194
		orf19.111	0.274	0.138	0.014	-0.019	0.106	0.14	-0.112	-0.208	0.072	0.46	-0.288	0.14	0.096	0.141	0.802	-0.369	-0.346
		orf19.1110	-0.244	-0.019	-0.14	-0.043	-0.228	0.07	0.212	0.084	-0.113	0.438	-0.266	-0.062	0.194	-0.066	-0.149	-0.579	-0.241
		orf19.1110	0.026	-0.425	-0.101	-0.02	-0.121	-0.134	-0.274	-0.16	-0.117	-0.17	-0.217	-0.015	-0.149	-0.27	-0.73	-0.885	-0.623
		orf19.1111	-0.214	-0.322	-0.187	-0.036	-0.198	-0.185	-0.353	-0.182	-0.089	-0.372	-0.161	-0.038	-0.255	-0.014	-0.527	-0.517	-0.35
		orf19.1111	-0.013	0.106	-0.034	-0.182	-0.047	-0.068	-0.128	-0.134	-0.231	-0.275	-0.164	-0.07	-0.126	-0.095	-0.692	-0.444	-0.273
		orf19.1112	-0.109	0.151	-0.023	-0.207	-0.221	0.139	0.2	0.218	0.103	-0.015	0.08	-0.176	0.026	0.119	0.21	0.27	0.476
		orf19.1112	-0.092	-0.121	-0.014	-0.269	-0.143	0.02	-0.207	-0.304	0.12	-0.198	-0.218	-0.098	0.043	-0.06	0.039	0.056	0.355
		orf19.1112	0.104	-0.386	0.026	-0.662	0.111	0.06	-0.419	-0.698	0.002	-0.383	-0.341	-0.471	-0.295	-0.405	-0.153	-0.064	0.035
		orf19.1112	0.189	0.007	0.07	-0.168	0.126	0.117	0.152	-0.204	0.066	0.049	-0.042	-0.115	0.145	0.057	0.19	0.225	0.466
		orf19.1112	0.239	-0.244	0.113	-0.911	0.126	-0.103	-0.5	-0.216	-0.176	-0.483	-0.224	-0.31	-0.354	-0.422	-0.317	-0.601	-0.134
		orf19.1113	-0.339	-0.384	-0.025	0.139	-0.131	-0.343	-0.5	-0.736	0.673	-0.001	-0.364	-0.059	-0.843	-0.53	-0.122	-0.203	-0.301
		orf19.1113	0.038	-0.318	0.026	-0.058	0.021	-0.086	-0.236	-0.694	-0.251	-0.185	-0.062	-0.195	-0.275	-0.252	0.051	0.024	0.124
		orf19.1114	-0.426	-0.128	-0.054	-0.151	-0.225	-0.134	-0.293	0.066	-0.144	-0.271	0.132	0	-0.215	-0.111	-0.311	-0.121	-0.048
		orf19.1114	-0.327	-0.119	0.007	-0.182	-0.154	-0.206	-0.327	-0.125	-0.181	-0.239	-0.014	-0.007	-0.097	-0.068	-0.365	-0.202	-0.3
		orf19.1115	-0.221	0.209	-0.067	0.143	-0.116	0.292	-1.755	-0.526	-0.875	-1.424	-0.626	-0.364	-0.8	-0.495	0.399	0.892	-1.182
		orf19.1115	-0.053	0.364	0.024	0.036	0.041	0.148	-1.977	-0.789	-1.057	-1.547	-0.887	-0.389	-0.813	-0.385	0.089	0.277	-1.047
		orf19.1115	-0.025	0.243	0.062	0.012	0.122	0.208	-2.164	-0.705	-1.03	-1.597	-1.03	-0.343	-0.888	-0.586	0.094	0.892	-1.36
		orf19.1115	0.14	0.026	0.072	-0.06	0.171	0.119	-2.07	-0.684	-0.994	-1.718	-0.937	-0.453	-0.871	-0.563	0.184	0.882	-1.338
		orf19.1115	0.184	0.131	0.169	-0.18	0.322	0.144	-1.998	-0.588	-0.949	-1.616	-0.563	-0.158	-0.879	-0.518	0.149	1.013	-1.3
		orf19.1116	-0.151	0.287	0.025	0.213	0.233	0.758	-0.718	-0.496	-0.328	-0.796	-0.19	-0.247	-0.285	-0.152	-0.189	1.002	-0.953
		orf19.1116	1.043	0.092	0.063	-0.053	1.117	-0.018	-0.904	-0.5	-0.519	-1.151	-0.313	-0.312	-0.573	-0.415	-0.623	0.716	-1.269
		orf19.1117	-0.385	-0.564	-0.434	-0.423	-0.103	-0.099	-0.504	0.305	0.152	0.192	-0.659	-0.073	0.07	-0.23	4.451	5.029	-0.056
		orf19.1117	-0.159	0.165	0.014	-0.049	0.144	0.578	0.601	0.05	0.015	0.09	0.261	0.262	0.242	0.175	5.051	5.422	-0.019
		orf19.1117	0.327	-0.416	0.118	0.113	0.259	-0.196	0.511	-0.593	-0.15	0.293	0.14	-0.146	0.335	0.023	2.56	1.921	0.659
		orf19.1117	0.349	NA	0.146	0.222	0.429	-0.302	0.107	-0.264	-0.013	0.624	0.698	-0.633	-0.154	-0.561	3.186	4.022	-1.224
		orf19.1117	0.779	0.239	0.254	0.344	0.729	0.146	0.818	0.879	0.35	0.793	0.288	0.409	0.519	0.069	2.274	1.779	0.167
		orf19.1119	-0.064	-0.073	-0.162	-0.144	-0.149	-0.107	-0.174	-0.156	-0.044	0.09	-0.133	-0.145	-0.063	-0.051	-0.054	-0.33	0.134
		orf19.1119	0.021	0.009	0.05	0.106	-0.06	0.21	0.005	-0.174	-0.091	0.053	0.02	0.123	0.122	0.002	0.112	-0.268	0.243
		orf19.1120	1.546	2.72	2.194	3.455	0.764	1.003	4.43	1.959	2.822	4.78	1.681	0.355	2.074	1.999	3.639	3.768	4.144
		orf19.1120	1.553	2.643	2.327	3.092	0.973	0.919	4.387	1.96	2.625	4.691	1.314	0.287	2.104	1.886	3.473	3.701	3.933
		orf19.1121	-0.182	-0.011	-0.115	-0.073	-0.199	-0.209	-0.117	-0.2	0.098	-0.121	-0.332	-0.116	-0.295	-0.174	-0.71	-1.029	-0.257
		orf19.1121	-0.056	-0.035	0.044	0.089	-0.073	-0.195	-0.113	-0.009	-0.122	0.035	0.018	-0.031	-0.126	-0.022	-0.812	-0.783	-0.295
		orf19.1122	0.82	2.2	0.052	2.005	-0.058	0.66	4.332	2.097	2.418	3.187	1.741	0.124	2.368	1.963	5.365	4.607	1.682
		orf19.1122	0.826	2.877	0.504	2.688	0.568	0.358	4.785	2.489	3.329	3.787	1.919	0.22	2.919	2.323	5.986	5.129	1.637
		orf19.1123	-0.058	0.465	-0.07	0.555	-0.33	-0.59	1.933	0.968	1.381	1.694	1.885	1.201	1.759	0.883	3.353	2.424	-0.04
		orf19.1123	0.203	0.319	0.198	0.12	-0.245	0.151	0.721	0.473	1.226	0.274	1.042	0.213	1.152	0.899	2.933	1.573	-0.068
		orf19.1124	-0.464	0.075	-0.323	0.278	-0.424	-0.009	0.541	0.623	0.325	0.332	0.469	-0.105	0.361	-0.048	0.574	0.134	1.046
		orf19.1124	-0.322	-0.07	-0.16	0.017	-0.324	-0.386	0.191	0.424	0.348	0.249	0.185	0.045	0.308	0.074	0.595	0.074	1.002
		orf19.1124	-0.223	-0.368	-0.107	-0.133	-0.117	-0.628	0.117	0.016	0.736	0.362	0.097	0.089	0.198	-0.005	0.772	-0.09	0.903
		orf19.1124	0.194	-0.048	0.15	0.38	0.248	-0.137	0.689	0.343	0.678	0.607	0.348	0.12	0.502	0.23	1.066	0.215	1.271
		orf19.1124	0.387	-0.022	0.285	0.045	0.309	0.035	0.589	0.219	0.201	0.535	0.469	0.079	0.462	0.357	0.938	0.441	1.14
		orf19.1124.2	-0.05	0.068	0.023	-0.026	-0.066	0.104	-0.24	0.069	-0.357	-0.187	-0.168	-0.1	-0.158	-0.188	-0.236	-0.715	-0.604
		orf19.1124.2	0.025	0.09	0.087	-0.035	-0.011	0.002	-0.293	0.157	-0.121	-0.281	0.055	-0.076	-0.127	-0.114	-0.276	-0.555	-0.613
		orf19.113	0.192	-0.127	0.095	-0.071	-0.218	0.505	-0.269	-0.434	0.045	-0.088	0.048	0.125	-0.005	-0.115	-0.655	0.001	0.331
		orf19.113	0.341	0.144	0.309	0.081	0.338	0.051	-0.006	0.072	0.08	0.007	0.185	0.231	0.09	-0.127	-0.805	-0.148	0.434
		orf19.1133	0.241	0.243	0.208	0.13	0.121	0.128	-0.352	-0.118	0.075	-0.593	-0.208	0.03	-0.216	-0.036	0.264	0.578	-0.498
		orf19.1133	0.242	0.066	0.259	0.025	0.193	0.02	-0.292	-0.081	0.114	-0.291	-0.182	0.083	-0.147	0.103	0.215	0.64	0.031
		orf19.1135	-0.066	-0.019	-0.194	-0.097	-0.196	-0.027	-0.085	0.03	0.013	-0.121	-0.339	0.014	-0.114	-0.075	-0.695	-0.393	-0.667
		orf19.1135	-0.015	0.104	0.121	0.021	-0.095	0.041	0.101	0.003	-0.062	-0.12	0.252	0.085	0.091	0.014	-0.454	0.083	-0.385
		orf19.1136	-0.064	-0.337	-0.222	-0.023	-0.078	0.326	-0.081	-0.555	-0.437	0.013	-0.525	-0.218	-0.779	-0.423	-0.092	-0.165	-0.163
		orf19.1136	0.374	-0.673	0.094	0.088	0.545	-0.14	-0.387	-0.815	-0.414	-0.398	-0.538	-0.309	-0.384	-0.362	-0.447	0.058	-0.149
		orf19.1137	-0.234	0.187	-0.122	-0.173	-0.568	0.075	-0.949	-0.559	-0.291	-0.874	-0.643	-0.631	-0.959	-0.673	-0.992	-0.59	-1.487
		orf19.1137	-0.022	0.158	-0.067	-0.334	-0.043	0.099	-1.551	-1.209	-1.071	-1.387	-0.668	-0.496	-0.839	-0.538	-2.118	-1.13	-1.644
		orf19.1139	-0.231	0.091	-0.047	0.166	-0.232	-0.009	0.119	0.223	0.307	0.246	0.244	0.075	0.273	0.254	0.715	0.833	0.833
		orf19.1139	-0.054	0.051	0.07	0.037	-0.104	-0.185	0.039	0.122	0.251	0.109	0.382	0.074	0.28	0.197	0.581	0.769	0.647
		orf19.114	-0.432	-0.035	-0.031	0.289	-0.213	-0.071	-0.025	-0.133	0.296	0.243	-0.224	0.192	-0.28	-0.164	-0.134	-0.525	-0.357
		orf19.114	0.227	-0.061	0.09	-0.043	-0.061	0.046	0.088	-0.147	-0.052	0.343	0.123	-0.041	0.16	-0.069	-0.026	-0.18	-0.202
		orf19.1140	-0.362	-0.178	-0.188	-0.279	-0.284	-0.011	-0.247	-0.265	-0.229	-0.19	-0.207	-0.096	-0.081	-0.066	-0.008	-0.052	0.202
		orf19.1140	-0.055	-0.005	0.056	0.08	0.067	0.198	-0.053	-0.126	-0.058	0.205	-0.042	-0.097	0.065	0.011	0.333	0.12	0.252
		orf19.1142	0.077	0.225	-0.127	0.304	-0.054	0.01	0.547	0.054	0.387	0.355	0.041	0.08	0.273	0.296	1.266	1.87	2.474
		orf19.1142	0.286	0.054	0.085	0.243	0.103	0.056	0.459	0.495	0.431	0.478	0.357	-0.053	0.455	0.133	1.357	1.986	2.353
		orf19.1143	-0.637	0.046	-0.264	0.061	-0.54	-0.103	-0.438	-0.128	-0.221	-0.513	-0.12	-0.263	-0.399	-0.103	-0.672	-0.21	0.268
		orf19.1143	-0.226	-0.297	-0.012	-0.285	-0.121	0.026	-0.657	-0.389	-0.445	-0.54	-0.142	-0.183	-0.386	0.006	-0.597	-0.176	0.161
		orf19.1144	0.317	-0.132	0.094	-0.011	0.165	0.147	0.043	-0.296	-0.197	-0.149	-0.004	-0.166	-0.005	0.064	2.386	3.226	0.958
		orf19.1144	0.342	-0.268	0.118	-0.124	0.339	0.075	-0.183	-0.141	-0.223	-0.31	0.161	0.024	-0.184	-0.081	2.307	3.367	0.828
		orf19.1146	0.069	-0.137	0.053	-0.055	-0.049	0.056	-0.042	-0.16	-0.436	-0.524	-0.089	-0.148	-0.448	-0.035	2.271	2.914	0.583
		orf19.1146	0.286	-0.444	0.081	-0.428	0.255	0.047	-0.514	-0.743	-0.608	-0.769	-0.319	-0.329	-0.549	-0.215	2.202	2.939	0.434
		orf19.1148	-0.131	-0.446	-0.473	-0.208	-0.24	-0.24	0.202	0.094	0.043	-0.204	-0.069	-0.075	-0.205	-0.364	-0.183	-0.14	0.11
		orf19.1148	0.19	0.083	-0.083	-0.27	0.572	0.457	0.379	0.286	0.23	-0.122	0.262	-0.254	0.331	0.352	-0.001	0.511	0.483
		orf19.1149	-0.135	-0.022	-0.1	0.075	-0.083	0.094	0.233	-0.216	0.277	0.218	-0.168	-0.086	0.091	0.11	-1.43	-1.324	2.129
		orf19.1149	0.309	-0.484	-0.029	-0.253	0.068	-0.214	-0.037	-0.081	-0.046	-0.077	-0.068	-0.083	0.056	-0.039	-1.792	-1.354	1.953
		orf19.115	-0.017	0.294	0.029	-0.02	-0.032	0.399	0.291	0.062	0.218	0.321	0.187	-0.05	0.055	-0.031	0.664	-0.157	-0.118
		orf19.115	0.013	0.446	0.123	0.129	0.15	0.597	0.362	0.175	0.145	0.375	0.296	-0.132	0.21	0.125	0.614	0.064	0.004
		orf19.115	0.266	0.175	0.186	0.279	0.323	0.354	0.26	0.095	0.471	0.177	0.009	0.019	0.138	0.231	0.287	-0.111	0.305
		orf19.115	0.382	0.222	0.207	0.032	0.355	0.266	0.146	0.144	0.132	0.42	0.42	0.029	0.244	0.306	0.354	0.179	0.137
		orf19.115	0.65	0.136	0.281	0.307	0.414	0.252	0.142	0.225	0.084	0.187	-0.027	-0.229	0.172	0.199	0.274	0.02	0.144
		orf19.1150	-0.427	-0.434	-0.035	-0.476	-0.324	-0.453	0.237	-0.312	-0.188	-0.203	-0.398	-0.338	-0.209	-0.29	0.363	-0.635	-0.181
		orf19.1150	-0.257	0.049	0.109	-0.039	-0.056	-0.046	0.486	0.163	0.069	0.408	0.193	0.152	-0.014	-0.161	0.496	-0.337	0.169
		orf19.1150.1	-0.695	-0.47	-0.194	-0.144	-0.424	0.032	-0.165	0.09	0.086	-0.106	0.348	0.074	0.067	0.375	0.119	0.397	-0.546
		orf19.1150.1	-0.682	-0.566	-0.033	-0.034	-0.225	-0.121	-0.269	0.089	0.096	-0.304	0.26	0.279	-0.151	0.159	-0.174	0.135	-0.713
		orf19.1152	-0.082	-0.434	-0.05	-0.287	-0.006	-0.248	0.343	-0.342	-0.023	0.193	-0.447	0.136	0.002	0.158	-0.206	-0.595	0.362
		orf19.1152	0.133	-0.372	-0.049	-0.153	0.023	-0.035	0.523	-0.359	0.038	0.387	-0.311	0.209	0.141	0.118	-0.088	-0.446	0.417
		orf19.1152	0.256	-0.286	-0.012	-0.349	0.172	0.076	0.398	-0.253	-0.022	0.262	-0.225	0.302	0.029	0.151	-0.102	-0.467	0.339
		orf19.1152	0.303	-0.325	0.033	-0.248	0.358	0.006	0.374	-0.321	-0.014	0.24	-0.239	0.258	0.116	0.183	-0.071	-0.398	0.443
		orf19.1152	0.399	-0.552	0.113	-0.079	0.423	-0.179	0.492	-0.025	0.174	0.384	-0.133	0.225	0.146	0.255	-0.067	-0.386	0.506
		orf19.1153	-0.27	-0.079	-0.089	0.086	-0.218	0.054	NA	0.341	0.503	0.927	0.308	0.011	0.514	0.333	-0.727	-0.441	0.114
		orf19.1153	-0.12	-0.154	-0.063	0.044	-0.182	-0.136	0.716	0.183	0.651	0.695	0.178	0.184	0.487	0.389	-0.897	-0.361	0.165
		orf19.1153	0.078	-0.113	-0.005	-0.008	0.026	-0.048	0.845	0.151	0.54	0.85	0.091	0.109	0.393	0.228	-0.843	-0.447	0.262
		orf19.1153	0.096	-0.36	0.034	-0.193	0.139	-0.002	0.55	0.244	0.433	0.637	0.216	0.045	0.397	0.226	-1.118	-0.347	0.162
		orf19.1153	0.169	-0.38	0.114	-0.278	0.14	-0.173	0.492	0.067	0.489	0.533	0.182	0.061	0.229	0.194	-1.175	-0.423	-0.01
		orf19.1154	-0.05	0.014	-0.059	0.001	-0.026	0.021	-0.157	0.168	0.053	-0.146	-0.098	-0.027	0.113	-0.042	-0.562	-0.165	0.089
		orf19.1154	NA	NA	NA	NA	NA	NA	NA	0.274	0.134	NA	-0.178	0.208	NA	0.027	-0.132	-0.059	0.361
		orf19.1155	-0.238	-0.136	0.024	-0.072	-0.007	-0.157	-0.147	0.194	-0.111	-0.325	0.161	0.023	-0.01	-0.12	0.384	0.528	1.132
		orf19.1155	0.165	0.184	0.035	0.188	0.146	0.066	0.154	0.208	0.183	0.068	-0.019	0.047	-0.019	-0.014	0.392	0.488	1.144
		orf19.1156	0.365	0.282	0.162	0.823	0.235	0.217	1.594	1.062	0.954	2.335	2.433	0.071	1.4	0.916	6.262	6.285	8.467
		orf19.1156	0.7	0.372	0.235	0.271	NA	0.335	1.28	1.509	1.44	2.674	3.217	0.17	1.756	1.647	6.815	7.258	9.28
		orf19.1158	0.018	0.128	-0.039	-0.116	-0.375	-0.378	0.449	-0.431	0.183	-0.312	-0.633	-0.017	-0.386	-0.12	-0.799	-0.4	-1.185
		orf19.1158	0.079	-0.055	0.027	0.002	0.106	-0.155	0.525	-0.375	-0.352	-0.073	-0.252	-0.041	-0.204	0.024	-0.124	-0.12	-0.617
		orf19.1159	-0.309	-0.351	-0.213	-0.224	-0.08	-0.29	0.408	0.169	0	0.427	0.047	0.112	0.075	0.211	-0.279	0.058	0.99
		orf19.1159	0.118	0.153	0.038	0.174	0.047	0.073	0.873	0.127	0.381	0.604	0.086	0.159	0.205	0.334	-0.119	0.141	1.244
		orf19.1160	0.014	0.09	-0.086	0.063	0.063	0.127	0.178	-0.057	0.014	0.069	-0.061	0.129	0.137	-0.013	-0.126	0.007	0.502
		orf19.1160	0.13	0.193	-0.049	0.098	0.127	-0.055	0.153	0.008	0.193	0.107	0.009	0.182	0.046	-0.021	-0.119	0.141	0.531
		orf19.1161	-0.457	-0.213	-0.428	-0.234	-0.372	-0.24	-0.014	0.202	0.28	-0.07	0.092	-0.081	0.268	0.129	-0.15	0.108	0.755
		orf19.1161	0.036	-0.124	-0.014	0.015	0.006	-0.035	0.238	0.214	0.388	0.18	0.112	0.038	0.206	0.178	-0.025	0.176	0.842
		orf19.1162	-0.255	-0.03	-0.166	0.086	-0.128	0.085	0.236	0.181	0.17	0.285	-0.224	0.151	0.185	0.165	0.007	0.031	-0.035
		orf19.1162	0.112	-0.033	-0.064	0.019	0.126	-0.115	0.195	0.007	0.246	0.158	-0.071	0.063	0.226	0.121	-0.181	0.055	-0.283
		orf19.1162.1	-1.054	-0.139	-0.369	-0.053	-0.194	0.018	0.214	-0.23	0.089	0.079	-0.184	0.026	0.042	-0.112	0.163	-0.693	0.157
		orf19.1162.1	-0.292	-0.008	-0.151	-0.257	-0.105	-0.585	-0.098	-0.661	0.083	-0.062	-0.552	-0.634	-0.436	-0.343	-0.385	-0.489	-0.641
		orf19.1162.1	-0.118	0.528	0.071	0.142	-0.077	0.528	0.653	0.332	0.538	0.254	0.335	0.302	0.586	0.211	0.646	0.079	0.461
		orf19.1162.1	-0.103	-0.204	0.222	-0.243	-0.025	0.048	0.211	0.083	0.045	0.002	0.061	-0.208	0.296	0.111	0.008	-0.491	0.061
		orf19.1162.1	0.578	-0.283	0.289	0.104	0.945	-0.078	-0.068	NA	-0.145	0.165	0.297	-0.146	0.09	0.502	-0.51	-0.899	-0.174
		orf19.1163	0.043	0.283	0.07	0.347	0.073	0.2	0.189	0.122	0.195	0.215	0.07	0.239	0.075	0.12	0.291	-0.381	-0.13
		orf19.1163	0.209	0.313	0.1	0.26	0.186	0.275	0.187	0.442	0.128	0.092	0.117	0.354	0.094	0.024	0.127	-0.327	0.023
		orf19.1164	-0.04	0.068	-0.043	-0.168	-0.011	0.065	-0.52	-0.156	-0.18	-0.485	-0.222	-0.027	-0.314	-0.198	-0.727	-0.963	-0.354
		orf19.1164	0.179	0.249	0.059	0.145	0.124	0.128	-0.332	-0.036	-0.226	-0.276	-0.162	-0.017	-0.203	-0.284	-0.499	-0.986	-0.462
		orf19.1166	0.065	-0.214	-0.195	-0.09	-0.103	-0.045	0.069	-0.136	0.017	-0.007	-0.225	-0.082	0.041	-0.058	-0.302	-0.038	0.098
		orf19.1166	0.184	-0.047	0.043	0.034	0.025	0.067	0.308	-0.215	-0.049	0.252	-0.009	-0.039	0.166	0.075	-0.079	0.094	0.299
		orf19.1167	-0.215	0.123	0.045	0.04	0.393	-0.106	-0.156	0.46	-0.103	-0.173	0.161	0.09	-0.824	-0.167	-1.23	-0.443	0.662
		orf19.1167	-0.143	-0.51	0.357	-0.091	0.563	0.151	-0.349	-0.34	0.104	-0.381	-0.163	0.086	-0.133	0.227	-0.926	-1.143	0.904
		orf19.1168	-0.693	-0.125	-0.223	-0.113	-0.35	-0.023	-0.601	0.042	-0.247	-0.414	-0.225	0.019	-0.12	-0.005	-0.306	-0.559	0.608
		orf19.1168	-0.392	-0.6	-0.1	-0.421	-0.176	-0.344	-0.95	-0.455	-0.354	-0.759	-0.523	-0.169	-0.498	-0.173	-0.648	-0.763	0.268
		orf19.1169	-0.095	0.315	-0.119	0.096	-0.026	0.177	0.313	0.468	0.002	0.257	0.317	0.121	0.35	0.143	0.316	-0.037	0.313
		orf19.1169	-0.058	0.367	0.001	0.095	0.085	0.077	0.134	0.405	0.101	0.131	0.182	0.112	0.121	0.142	0.432	-0.007	0.421
		orf19.1169	-0.027	-0.23	0.001	0.044	0.154	0.039	0.272	0.04	0.063	0.05	-0.162	-0.11	0.127	0.107	0.069	-0.103	0.182
		orf19.1169	0.096	0.192	0.003	-0.194	0.228	0.078	0.129	-0.064	-0.065	0.093	0.098	-0.098	0.077	0.058	0.037	-0.154	0.354
		orf19.1169	0.161	0.019	0.105	-0.066	0.24	0.179	0.076	0.138	0.33	0.037	0.402	0.103	0.343	0.202	-0.028	0.152	0.47
		orf19.117	-0.879	-0.473	-0.303	-0.189	-0.455	-0.385	0.081	-0.306	-0.16	0.188	-0.168	-0.152	-0.142	0.076	0.891	1.312	0.905
		orf19.117	-0.538	-0.438	-0.242	-0.195	-0.289	-0.321	0.089	0.069	-0.065	0.068	0.003	-0.002	-0.004	0.176	1.009	1.313	1.349
		orf19.1170	-0.145	-0.17	-0.225	-0.219	-0.258	-0.109	-0.407	0.031	-0.277	-0.49	-0.379	-0.035	-0.246	-0.109	-0.372	-0.321	0.516
		orf19.1170	-0.076	0.002	-0.098	-0.189	-0.209	0.162	-0.108	-0.226	-0.111	-0.137	-0.249	0.099	-0.09	-0.181	-0.315	-0.26	0.321
		orf19.1170	-0.032	-0.043	-0.045	-0.2	-0.183	0.114	-0.242	-0.323	-0.328	-0.249	-0.453	-0.084	-0.172	-0.194	-0.176	-0.237	0.384
		orf19.1170	0.016	-0.03	0.014	-0.2	0	0.143	-0.169	-0.319	-0.335	-0.087	-0.419	-0.139	-0.302	-0.35	-0.215	0.075	0.385
		orf19.1170	0.181	0.145	0.072	0.01	0.068	-0.039	-0.183	-0.167	-0.232	-0.071	-0.051	0.155	-0.225	-0.083	-0.158	0.013	0.5
		orf19.1171	-0.422	0.056	-0.198	0.134	-1.826	-0.092	-0.832	0.266	-0.293	-0.408	0.107	-0.018	-0.733	-0.627	1.059	1.053	-1.342
		orf19.1171	-0.296	-0.148	-0.145	0.037	-0.299	-0.228	-0.464	0.311	-0.457	-0.159	-0.094	-0.04	-0.531	-0.066	0.843	1.556	-1.175
		orf19.1171	-0.086	-0.05	0.038	-0.335	-0.145	-0.5	-1.049	-0.219	-1.039	-1.307	-0.509	-0.219	-0.368	-0.329	0.375	1.518	-1.375
		orf19.1171	-0.079	-1.129	0.071	-0.713	-0.01	-0.37	-1.069	-0.693	-0.632	-0.57	-0.519	-0.085	-0.089	-0.001	0.364	1.603	-1.364
		orf19.1171	0.034	0.099	0.161	-0.346	0.014	-0.369	-0.488	0.021	-0.258	-0.487	0.078	0.067	0.003	0.103	0.554	1.084	-1.261
		orf19.1177	0.028	0.162	-0.005	0.094	0.017	0.104	-0.38	-0.161	-0.261	-0.283	-0.149	-0.066	-0.213	-0.164	-0.14	0.53	-0.222
		orf19.1177	0.08	0.321	0.075	0.22	0.04	0.208	-0.105	0.059	-0.182	-0.289	0.047	0.081	-0.108	-0.125	-0.113	0.623	0.012
		orf19.1178	-0.211	0.353	0.104	0.284	-0.153	0.104	0.252	-0.067	0.065	-0.252	0.231	0.306	-0.111	0.22	0.102	-0.102	0.345
		orf19.1178	0.188	-0.132	0.16	0.053	0.175	-0.122	-0.205	-0.297	-0.182	-0.339	-0.205	0.143	-0.117	-0.01	-0.07	-0.166	0.577
		orf19.1179	-0.11	0.066	-0.009	0.067	-0.065	0.159	0.132	0.059	0.044	0.225	0.12	0.107	0.304	0.137	0.654	0.398	0.039
		orf19.1179	-0.072	-0.016	0.047	0.106	0.001	-0.056	0.097	0.056	0.004	0.237	0.125	0.137	0.186	0.095	0.601	0.368	0.01
		orf19.118	0.151	0.085	-0.105	0.006	0.101	0.093	-0.244	-0.006	-0.029	-0.105	-0.167	-0.006	-0.173	-0.144	0.604	1.103	-0.436
		orf19.118	0.679	-0.262	0.043	-0.378	0.166	-0.128	-0.675	-0.348	-0.151	-0.498	-0.444	-0.123	-0.385	-0.18	0.023	0.885	-0.632
		orf19.1180	0.163	0.019	-0.023	0.315	-0.043	0.073	0.524	0.436	0.38	0.518	0.365	0.216	0.542	0.389	0.385	0.644	0.674
		orf19.1180	0.209	-0.084	0.118	0.185	0.054	-0.136	0.368	0.33	0.311	0.452	0.204	0.314	0.453	0.265	0.111	0.58	0.53
		orf19.1181	0.027	0.219	0.053	0.265	-0.035	0.08	-0.543	0.413	-0.315	-0.392	0.025	0.178	0.066	0.212	-1.223	-0.25	-0.875
		orf19.1181	0.161	-0.109	0.153	-0.126	0.031	0.405	-0.193	-0.119	-0.574	-0.336	0.201	0.182	-0.006	0.153	-0.232	-0.1	-1.044
		orf19.1182	-0.068	-0.132	0.096	-0.044	-0.216	-0.139	0.295	-0.194	-0.001	0.214	-0.199	0.211	0.064	0.198	-0.407	-0.647	-0.067
		orf19.1182	0.156	-0.239	0.127	-0.159	0.113	-0.011	0.392	-0.254	0.012	0.206	-0.089	0.091	0.268	0.053	-0.34	-0.442	0.282
		orf19.1183	-0.282	-0.644	-0.287	-0.15	-0.176	-0.383	0.019	-0.228	0.014	0.029	-0.221	0.011	0.031	0.072	-0.828	-1.027	-0.279
		orf19.1183	-0.014	-0.256	0.014	-0.094	0.012	-0.097	0.156	-0.018	-0.014	0.2	-0.082	0.026	0.261	0.136	-0.665	-0.844	-0.153
		orf19.1185	0.136	0.132	0.061	0.132	0.157	0.077	0.423	0.178	0.34	0.234	0.049	0.231	0.201	0.144	0.821	1.023	0.425
		orf19.1185	0.366	0.118	0.109	0.155	0.196	0.191	0.363	0	0.016	0.232	-0.098	0.119	0.237	0.084	0.68	0.904	0.241
		orf19.1186	-0.128	0.047	-0.11	0.148	-0.257	0.095	-0.105	0.006	-0.126	-0.227	-0.008	0.015	-0.097	-0.113	0.52	1.12	0.06
		orf19.1186	0.236	0.09	0.007	0.114	0.182	-0.08	-0.179	-0.028	-0.132	-0.219	0.015	-0.068	-0.032	-0.105	0.29	1.141	0.264
		orf19.1187	-0.073	-0.278	-0.125	-0.319	-0.097	-0.092	-0.094	-0.313	-0.055	-0.048	-0.055	-0.152	-0.04	-0.146	0.044	-0.09	-1.043
		orf19.1187	0.234	-0.526	-0.048	-0.385	0.148	-0.356	-0.153	-0.217	0.151	-0.17	-0.052	-0.246	-0.099	-0.131	-0.171	0.048	-1.003
		orf19.1189	-0.928	-0.13	-0.457	-0.208	-0.764	-0.173	0.671	0.447	0.449	0.574	0.389	-0.111	0.406	0.472	0.752	0.547	0.675
		orf19.1189	-0.324	-0.377	-0.173	-0.281	-0.499	-0.195	0.612	0.14	0.446	0.54	0.159	-0.157	0.328	0.349	0.83	0.507	0.573
		orf19.1189	-0.231	-0.335	-0.145	-0.287	-0.377	-0.225	0.381	0.168	0.379	0.421	0.264	0.03	0.26	0.334	0.587	0.402	-0.109
		orf19.1189	-0.138	-0.757	-0.12	-0.633	-0.248	-0.685	0.099	-0.068	0.27	0.181	0.12	-0.189	-0.002	0.147	0.249	0.098	-0.074
		orf19.1189	0.017	-0.131	0.017	-0.202	-0.175	-0.256	0.604	0.245	0.525	0.707	0.369	-0.065	0.392	0.366	0.694	0.406	0.128
		orf19.119	-0.125	0.354	-0.057	-0.184	-0.182	0.149	-0.692	-0.25	0.104	-0.45	-0.008	-0.345	-0.827	-0.431	-1.021	-1.558	-0.754
		orf19.119	0.061	-0.095	-0.036	-0.085	-0.095	-0.187	-0.433	-0.56	-0.356	-0.399	-0.245	-0.388	-0.308	-0.259	-0.746	-1.231	-0.356
		orf19.1190	0.234	0.034	0.102	0.317	0.18	0.17	0.672	0.323	0.375	0.627	0.059	0.207	0.575	0.421	0.465	0.701	1.038
		orf19.1190	0.292	0.239	0.176	0.171	0.304	0.139	0.584	0.284	0.557	0.508	0.135	0.171	0.427	0.372	0.26	0.677	1.179
		orf19.1191	0.023	0.218	-0.023	0.135	-0.199	0.158	0.563	0.437	0.283	0.405	0.08	0.126	0.206	0.239	0.371	0.142	0.774
		orf19.1191	0.09	0.016	0.014	0.288	-0.095	-0.08	0.383	0.13	0.369	0.355	-0.077	0.009	0.287	0.136	0.175	0.111	0.539
		orf19.1191	0.198	-0.107	0.017	-0.102	-0.007	0.164	0.424	-0.187	0.156	0.298	0.11	-0.036	0.342	0.127	0.177	0.039	0.518
		orf19.1191	0.274	-0.227	0.081	0.041	0.087	-0.189	0.053	-0.053	0.248	0.09	0.029	0.009	-0.025	0.007	0.084	0.079	0.34
		orf19.1191	0.277	-0.287	0.193	-0.165	0.256	-0.142	0.151	0.171	0.134	0.018	0.042	-0.089	0.363	0.309	0.118	0.085	0.386
		orf19.1192	-0.239	0.181	-0.011	0.005	-0.136	0.028	-1.498	-0.643	-0.813	-1.48	-0.588	-0.267	-0.835	-0.288	-0.964	0.601	-1.329
		orf19.1192	-0.132	0.247	-0.01	0.152	-0.036	0.098	-1.473	-0.64	-0.815	-1.1	-0.558	-0.395	-0.717	-0.461	-0.972	0.734	-1.127
		orf19.1193	-0.353	-0.326	-0.348	-0.405	-0.34	-0.236	-0.319	-0.56	-0.246	-0.294	-0.504	-0.057	-0.334	-0.147	-0.298	-0.779	-0.985
		orf19.1193	-0.269	-0.554	-0.341	-0.549	-0.161	-0.252	-0.437	-0.559	-0.216	-0.386	-0.577	-0.071	-0.203	-0.129	-0.205	-0.754	-0.866
		orf19.1195	0.099	0.161	0.027	0.159	0.164	0.266	0.336	0.498	0.301	0.423	0.305	0.298	0.38	0.403	0.408	0.483	0.093
		orf19.1195	0.292	0.336	0.191	0.314	0.234	0.112	0.537	0.627	0.431	0.493	0.388	0.324	0.47	0.415	0.383	0.683	0.258
		orf19.1196	0	0.022	0.002	0.024	0.021	-0.094	0.27	0.23	0.159	0.295	0.046	-0.011	0.074	0.223	0.011	0.092	0.228
		orf19.1196	0.22	0.02	0.061	0.152	0.099	0.002	0.258	0.308	0.135	0.269	0.29	0.139	0.216	0.436	-0.052	1.293	0.547
		orf19.1198	-0.359	0.03	-0.194	-0.187	-0.139	-0.197	-0.098	0.03	-0.204	0.056	-0.014	-0.033	-0.165	-0.013	-0.259	-0.574	-0.016
		orf19.1198	-0.355	-0.037	-0.116	0.156	-0.074	-0.082	0.094	-0.044	-0.129	0.201	-0.044	0.122	0.145	0.232	-0.402	-0.492	-0.053
		orf19.1199	-0.443	-0.01	-0.165	0.009	-0.234	0.008	-0.633	-0.101	-0.293	-0.407	0.001	-0.137	-0.322	-0.204	-0.463	-0.918	-0.61
		orf19.1199	-0.088	-0.188	-0.112	-0.141	0.015	-0.1	-0.795	-0.116	-0.427	-0.543	0.077	-0.04	-0.122	-0.049	-0.686	-0.898	-0.562
		orf19.1200	-0.442	0.304	-0.104	0.044	-0.21	0.076	0.01	0.042	-0.014	0.064	0.234	0.153	0.074	0.095	-0.084	-0.562	-0.538
		orf19.1200	-0.006	-0.2	0.058	0.032	0.036	-0.158	-0.038	0.052	-0.066	0.033	-0.14	-0.03	0.152	-0.155	-0.144	-0.699	-0.804
		orf19.1201	0.004	0.054	-0.105	0.007	-0.032	-0.133	0.065	0.043	0.253	0.148	-0.184	0.096	0.073	0.096	-0.472	-0.631	-0.489
		orf19.1201	0.153	0.165	0.181	0.33	0.145	0.096	0.222	0.203	0.244	0.26	-0.103	0.208	0.175	0.244	-0.189	-0.475	-0.44
		orf19.1202	-0.11	0.001	-0.022	0.043	-0.107	0.127	-0.298	-0.499	-0.404	-0.619	-0.454	-0.623	-0.184	-0.315	0.12	1.257	-0.656
		orf19.1202	0.034	0.231	0.153	0.005	0.115	0.239	-0.276	0.104	-0.532	-0.66	-0.202	0.011	-0.115	-0.246	-0.017	1.058	-0.655
		orf19.1203	-0.54	-0.119	-0.138	0.073	-0.293	-0.171	0.093	0.285	0.394	0.229	0.122	0.043	0.384	0.391	0.097	0.533	0.552
		orf19.1203	-0.322	-0.013	0.011	0.117	-0.037	-0.059	0.37	0.468	0.331	0.361	0.428	0.241	0.457	0.367	0.066	0.563	0.784
		orf19.1203.1	-0.448	-0.39	-0.329	-0.305	-0.428	-0.305	0.014	0.168	0.302	-0.092	0.156	-0.36	0.311	0.129	0.183	1.512	0.934
		orf19.1203.1	0.218	0.24	0.076	0.362	0.147	0.184	0.668	0.423	0.637	0.448	0.361	0.011	0.53	0.227	0.892	1.66	1.282
		orf19.1204	-0.265	0.212	0.06	0.289	-0.114	0.194	0.348	0.404	0.247	0.311	0.296	0.33	0.386	0.165	0.163	0.043	0.279
		orf19.1204	0.059	0.038	0.111	0.205	0.149	-0.088	0.048	0.163	0.011	0.201	0.226	0.122	0.098	0.127	-0.137	-0.148	0.197
		orf19.1207	-0.321	NA	0.033	-0.497	-0.141	-0.139	-0.54	0.024	-0.128	-1.087	-0.785	-0.326	NA	-0.248	0.264	-1.037	NA
		orf19.1207	NA	NA	0.044	0.686	NA	-0.246	NA	-0.006	0.023	NA	-0.211	-0.63	-0.291	0.216	NA	0.983	-0.201
		orf19.1208	0.394	0.225	0.012	-0.128	0.168	0.069	-0.481	-0.596	-0.342	-0.77	-0.389	-0.45	-0.562	-0.312	-0.573	0.825	-0.062
		orf19.1208	0.4	0.248	0.145	-0.001	0.227	0.492	-0.36	-0.488	-0.474	-0.44	-0.171	-0.243	-0.198	-0.192	-0.263	0.917	0.166
		orf19.121	-0.36	-0.179	-0.075	0.095	-0.343	-0.168	0.013	-0.031	0.147	0.035	0.009	-0.069	0.071	-0.065	0.173	0.36	0.514
		orf19.121	-0.235	-0.298	-0.009	-0.003	-0.228	-0.128	0.194	-0.225	0.148	0.292	-0.184	-0.049	0.33	0.103	0.073	0.474	0.826
		orf19.121	-0.14	-0.469	-0.007	-0.258	-0.155	-0.37	-0.215	-0.442	-0.044	-0.248	-0.223	-0.384	-0.063	-0.196	-0.118	0.201	0.323
		orf19.121	-0.074	-0.347	0.075	0.083	-0.133	-0.155	0.136	-0.11	0.07	0.096	-0.12	-0.05	0.144	0.063	0.104	0.349	0.883
		orf19.121	0.04	-0.622	0.107	-0.377	-0.09	-0.346	-0.189	-0.255	-0.094	-0.025	-0.275	-0.353	0.013	-0.044	-0.093	0.668	0.291
		orf19.1210	0.155	0.376	-0.024	0.025	0.027	0.182	0.302	0.168	0.106	0.158	0.004	0.105	0.305	0.132	0.38	0.201	0.359
		orf19.1210	0.443	-0.058	0.064	-0.105	0.264	0.074	0.192	-0.106	0.024	0.178	-0.213	0.047	0.17	0.013	0.147	0.136	0.338
		orf19.1212	0.046	0.006	0.092	-0.051	0.103	0.057	0.1	-0.117	0.287	0.027	-0.075	0.021	0.028	0.05	0.247	1.053	0.446
		orf19.1212	0.414	0.3	0.31	0.278	0.197	0.319	0.505	0.093	0.241	0.421	0.204	0.118	0.299	0.156	0.76	1.343	0.679
		orf19.1214	-0.191	0.015	-0.12	0.082	-0.244	-0.119	-0.225	-0.139	-0.098	-0.004	-0.062	0.033	-0.073	-0.109	-0.443	-0.764	-0.124
		orf19.1214	-0.18	-0.185	-0.041	-0.176	-0.145	-0.067	-0.153	-0.181	-0.191	-0.118	-0.032	-0.107	-0.045	-0.104	-0.47	-0.801	-0.174
		orf19.1215	0.293	0.108	0.314	-0.024	-0.171	0.017	-0.657	-0.036	-0.654	-0.513	-1.736	-0.408	NA	-0.602	0.26	-0.35	NA
		orf19.1215	0.304	0.023	0.326	-0.584	NA	-0.885	-0.322	0.634	0.655	NA	-0.139	NA	-0.336	NA	-1.137	NA	NA
		orf19.1217	0.017	0.111	-0.199	-0.194	-0.113	-0.002	-0.084	0.134	-0.172	-0.157	-0.116	0.06	-0.116	-0.023	0.036	-0.434	-0.238
		orf19.1217	0.189	0.079	0.007	0.067	0.196	0.006	0.118	-0.014	0.034	0.151	-0.069	-0.014	-0.011	0.051	0.197	-0.252	0.085
		orf19.1219	-0.04	-0.104	0.068	-0.325	-0.117	0.124	-0.25	-0.547	-0.219	-0.229	-0.647	-0.393	-0.708	-0.633	0.017	-0.955	-0.94
		orf19.1219	0.066	-0.185	0.132	-0.834	0.138	-0.036	-0.322	-0.815	-0.27	-0.215	-0.393	-0.601	-0.567	-0.522	-0.087	-0.756	-0.98
		orf19.122	0.446	0.002	0.062	-0.207	0.267	0.065	-1.144	-0.364	-0.834	-0.999	-0.636	-0.38	-0.797	-0.23	0.123	-0.154	-2.002
		orf19.122	0.488	-0.093	0.228	-0.29	0.383	-0.082	-1.046	-0.697	-0.798	-1.116	-0.559	-0.177	-0.77	-0.481	-0.252	-0.094	-2.262
		orf19.1220	0.129	0.036	0.046	0.151	0.066	-0.002	0.385	0.098	0.223	0.322	0.177	0.04	0.091	0.246	0.258	0.039	0.546
		orf19.1220	0.228	0.107	0.079	0.127	0.086	-0.077	0.395	-0.072	0.023	0.343	-0.214	0.024	0.154	0.162	0.127	-0.045	0.419
		orf19.1221	0.152	0.037	-0.122	0.01	-0.04	0.063	0.331	0.037	0.054	0.137	0	0.073	0.204	-0.108	0.291	0.124	0.483
		orf19.1221	0.163	-0.06	0.121	-0.131	-0.037	-0.054	-0.011	0.182	-0.068	0.097	0.132	0.054	0.147	-0.023	0.231	0.167	0.301
		orf19.1223	-0.053	-0.549	-0.092	-0.303	0.047	-0.207	-1.117	-0.748	-0.736	-0.723	-0.443	-0.433	-0.688	-0.48	1.56	1.512	0.701
		orf19.1223	0.193	-0.562	0.046	-0.571	0.078	-0.37	-1.39	-1.123	-0.452	-0.969	-0.583	-0.593	-1.073	-0.541	1.242	1.326	0.271
		orf19.1224	0.286	-0.041	0.07	-0.198	0.051	0.065	-0.207	-0.385	-0.586	-0.777	-0.522	0.124	-0.537	-0.292	0.195	-0.173	1.352
		orf19.1224	0.415	-0.05	0.097	-0.061	0.246	0.04	-0.154	-0.471	-0.571	-0.627	-0.53	0.127	-0.596	-0.375	0.35	-0.192	1.22
		orf19.1225	-0.371	-0.208	-0.209	-0.043	-0.066	-0.164	0.413	0.043	-0.146	-0.127	-0.129	0.025	-0.161	-0.029	0.483	0.348	0.237
		orf19.1225	-0.072	-0.482	-0.158	-0.425	-0.038	-0.231	-0.08	-0.474	-0.169	-0.377	-0.146	-0.003	-0.39	-0.181	0.134	0.131	0.051
		orf19.1227	0.091	0.435	-0.109	0.266	0.534	0.708	0.87	0.064	0.401	0.732	0.189	0.113	0.818	0.433	0.558	0.499	0.381
		orf19.1227	0.268	-0.043	0.047	0.06	0.829	-0.179	0.247	0.489	0.239	-0.483	0.261	-0.077	-0.018	-0.055	-2.429	0.399	0.167
		orf19.1228	-0.146	-0.275	-0.132	-0.36	-0.097	-0.321	-0.315	-0.324	-0.619	-0.437	-0.243	-0.25	-0.42	-0.23	-0.356	-0.588	-0.155
		orf19.1228	-0.07	0.124	0.074	0.274	0.091	-0.016	-0.022	-0.27	-0.22	-0.051	-0.344	0.024	-0.218	0.088	-0.165	-0.33	0.113
		orf19.1229	-0.472	-0.18	-0.389	-0.626	-0.449	-0.362	-0.491	-0.726	-0.365	-0.553	-0.625	-0.374	-0.623	-0.508	-1.134	-1.309	-1.261
		orf19.1229	-0.254	-0.314	-0.151	-0.589	-0.356	-0.293	-0.45	-0.315	-0.282	-0.329	-0.602	-0.142	-0.603	-0.43	-1.064	-1.197	-1
		orf19.123	-0.137	0.12	0.021	0.231	-0.053	0.09	0.041	0.14	0.255	0.093	0.337	0.117	0.325	0.217	-0.169	-0.21	0.673
		orf19.123	0.087	0.272	0.029	0.06	0.188	0.135	0.196	0.22	0.149	0.14	0.36	0.099	0.097	0.181	0.094	-0.038	0.515
		orf19.1232	-0.064	0.502	-0.046	0.217	-0.276	0.163	0.031	0.204	0.115	0.344	0.234	-0.135	0.001	0.012	0.473	0.677	-0.103
		orf19.1232	0.405	-0.026	0.055	-0.256	0.262	-0.155	-0.446	-0.053	0.042	-0.31	-0.102	-0.233	-0.203	-0.214	-0.122	0.416	-0.228
		orf19.1233	-0.144	-0.098	-0.202	-0.327	-0.137	-0.096	-0.435	-0.259	-0.268	-0.227	-0.258	-0.167	-0.231	-0.34	-0.403	-0.613	-0.664
		orf19.1233	-0.069	0.133	-0.059	-0.041	-0.131	-0.118	-0.33	-0.173	-0.229	-0.104	-0.065	-0.188	-0.21	-0.252	-0.363	-0.431	-0.84
		orf19.1234	0.179	0.195	-0.079	-0.125	0.039	0.19	-0.524	-0.229	-0.522	-0.794	-0.129	-0.307	-0.538	-0.431	-0.634	1.052	0.048
		orf19.1234	0.246	0.436	-0.075	0.042	0.051	0.484	-0.3	-0.28	-0.474	-0.309	-0.299	-0.322	-0.194	-0.293	-0.12	0.696	0.061
		orf19.1235	0.073	0.181	-0.044	-0.286	-0.057	0.003	-0.21	-0.37	-0.274	-0.17	-0.496	-0.136	-0.582	-0.219	-0.132	-0.1	-1.157
		orf19.1235	0.098	0.219	0.04	-0.099	0.043	0.143	-0.007	-0.331	-0.275	0.069	-0.514	0.106	-0.372	-0.17	-0.114	0.065	-0.627
		orf19.1236	0.143	0.146	-0.053	0.149	0.045	-0.026	0.249	-0.125	0.135	0.187	-0.034	-0.079	-0.004	-0.024	0.325	0.48	0.578
		orf19.1236	0.292	-0.198	0.029	-0.194	0.136	-0.051	-0.106	0.033	0.054	-0.162	0.079	-0.065	-0.113	-0.118	-0.007	0.321	0.171
		orf19.1237	-0.503	-0.119	-0.207	-0.573	-0.63	-0.259	-0.58	-0.262	-0.448	-0.291	0.008	-0.43	0.074	-0.171	-1.064	-0.126	0.991
		orf19.1237	0.027	0.134	-0.171	-0.222	-0.336	-0.133	-0.028	-0.279	0.11	-0.086	0.145	-0.189	-0.159	-0.27	-0.574	-0.061	1.178
		orf19.1237	0.054	-1.079	-0.01	-0.388	-0.169	-0.553	-0.744	-0.349	0.027	-0.606	-0.247	-0.547	-0.278	-0.501	-1.205	-0.332	0.813
		orf19.1237	0.244	-0.234	0.143	0.149	0.182	0.068	-0.013	-0.196	-0.068	0.223	0.094	-0.312	0.064	-0.091	-0.492	0.191	1.36
		orf19.1237	0.317	-0.347	0.194	0.017	0.503	-0.055	0.013	-0.067	-0.227	0.033	0.376	-0.283	0.021	-0.141	-0.188	0.436	1.11
		orf19.1238	0.156	0.152	0.108	-0.085	-0.055	0.184	-0.99	-0.457	-0.622	-0.882	-0.248	-0.367	-0.545	-0.327	-0.967	-0.292	-1.302
		orf19.1238	0.253	0.05	0.181	-0.012	0.103	0.159	-1.053	-0.435	-0.528	-1.154	-0.538	-0.061	-0.663	-0.45	-1.234	-0.246	-2.106
		orf19.1239	-0.541	0.443	-0.321	-0.333	-0.191	0.478	0.458	0.379	0.599	0.467	0.5	0.412	0.627	0.656	0.603	1.645	-1.163
		orf19.1239	-0.449	NA	0.004	0.564	0.572	0.82	0.691	0.557	0.595	NA	-0.789	-0.025	NA	0.683	1.597	NA	-1.212
		orf19.1239	0.05	0.25	0.048	-0.026	0.606	0.507	0.377	0.233	0.289	0.557	0.109	0.172	0.47	0.307	0.745	0.897	-1.005
		orf19.1239	0.056	0.414	0.152	-0.041	0.957	0.271	0.386	0.469	0.908	0.192	0.622	0.439	0.387	0.447	0.938	1.432	-1.046
		orf19.1239	0.47	0.211	0.179	-0.812	1.07	-0.765	1.679	0.665	1.763	-0.708	-0.415	-0.633	1.188	0.655	6.535	6.747	-1.302
		orf19.124	-0.33	0.261	-0.34	-0.263	-0.345	-0.09	-0.933	0.101	-0.449	-0.594	-0.063	-0.372	-0.532	-0.411	-0.578	-1.323	-1.26
		orf19.124	-0.32	-0.356	-0.181	-0.707	-0.317	-0.422	-1.29	-0.418	-0.246	-0.986	-0.175	-0.67	-0.877	-0.769	-1.087	-1.082	-1.926
		orf19.1240	0.151	0.044	-0.158	0.015	0.053	0.08	0.313	0.21	0.166	0.259	0.176	0.159	0.021	0.129	0.314	0.117	0.3
		orf19.1240	0.153	-0.11	0.014	-0.095	0.3	-0.003	0.271	0.056	0.019	0.15	-0.083	0.099	0.189	0.171	0.121	-0.024	0.165
		orf19.1244	0.04	0.114	0.09	0.257	-0.119	0.015	0.305	-0.015	0.147	0.072	-0.01	0.102	0.09	0.133	0.783	1.324	0.847
		orf19.1244	0.095	0.236	0.115	0.111	-0.06	-0.004	0.274	0.104	-0.078	0.108	-0.017	-0.088	0.087	0.03	0.669	1.277	0.776
		orf19.1246	-0.017	-0.342	0.04	-0.341	-0.017	-0.096	0.069	-0.08	0.155	-0.011	0.024	0.264	0.228	0.286	-0.587	-0.343	1.012
		orf19.1246	0.156	-0.232	0.175	-0.139	0.124	0.087	0.186	-0.203	0.119	0.142	-0.281	0.089	0.12	0.137	-0.357	-0.335	0.806
		orf19.1247	-0.123	-0.029	0.009	0.109	-0.154	0.094	0.274	0.104	-0.073	-0.044	0.018	0.077	0.197	-0.003	0.272	0.022	0.023
		orf19.1247	-0.003	-0.02	0.016	0.093	-0.084	0.014	0.136	-0.077	-0.101	0.029	0.02	0.037	0.063	0.049	0.702	0.028	0.237
		orf19.1248	-0.001	0.003	-0.023	0.035	0.101	0.031	-0.148	-0.174	-0.068	-0.093	-0.263	-0.002	-0.153	-0.169	-0.081	-0.072	0.018
		orf19.1248	0.087	0.066	0.043	0.07	0.111	0.041	-0.133	0.045	-0.058	-0.158	-0.028	0.073	-0.018	-0.033	-0.059	-0.159	0.045
		orf19.1249	-0.163	-0.031	-0.082	-0.028	-0.118	0.023	-0.014	0.014	-0.079	0.028	0.065	0.177	0.012	-0.079	-0.358	-0.387	-0.051
		orf19.1249	-0.072	0.01	0.019	0.09	-0.034	0.068	0.057	-0.009	-0.08	-0.121	0.17	0.155	0.096	0.002	-0.471	-0.165	-0.046
		orf19.125	0.08	-0.123	-0.114	-0.246	0.013	-0.213	-0.193	0.294	-0.175	0.065	-0.009	0.264	-0.426	-0.077	2.677	2.646	-0.672
		orf19.125	0.104	0.375	0.085	0.257	0.111	0.103	0.283	0.314	0.037	0.229	0.088	0.225	-0.205	-0.113	1.291	1.566	-0.543
		orf19.125	0.122	0.015	0.114	0.006	0.118	0.189	-0.2	0.028	-0.016	-0.046	-0.205	0.063	-0.254	-0.129	1.64	0.871	-0.603
		orf19.125	0.195	0.068	0.121	-0.004	0.226	0.138	0.001	0.015	-0.158	0.009	0.012	0.092	-0.063	-0.151	2.373	2.802	-0.717
		orf19.125	0.294	-0.03	0.147	0.34	0.232	0.221	-0.024	0.043	-0.146	0.156	-0.178	0.086	-0.213	0.075	2.293	1.794	-0.629
		orf19.1250	-0.097	0.177	-0.062	0.057	0.123	0.08	-0.193	0.167	0.158	-0.189	0.468	0.04	-0.011	0.053	-0.264	-0.304	-0.559
		orf19.1250	0.047	0.073	0.083	-0.038	0.214	0.169	-0.087	0.078	0.048	0.076	0.348	-0.005	0.049	0.165	-0.042	-0.029	-0.248
		orf19.1251	0.215	0.163	0.045	0.112	0.18	0.236	-0.87	-0.269	-0.436	-0.753	-0.189	-0.064	-0.343	-0.232	-0.358	0.412	-1.341
		orf19.1251	0.24	0.028	0.11	-0.047	0.271	0.096	-0.895	-0.779	-0.874	-0.707	-0.302	-0.132	-0.314	-0.107	-0.422	0.334	-1.516
		orf19.1252	-0.223	-0.252	-0.003	-0.069	-0.099	-0.022	0.093	-0.09	-0.02	-0.066	-0.03	0.11	0.079	0.154	0.266	0.469	0.393
		orf19.1252	-0.176	-0.272	0.106	-0.127	-0.043	-0.099	-0.07	-0.201	-0.024	-0.052	0.116	-0.019	-0.097	0.022	0.113	0.471	0.136
		orf19.1253	-0.134	-0.028	-0.067	-0.236	-0.099	0.054	0.302	-0.1	-0.011	0.097	-0.211	0.006	0.034	-0.001	0.183	0.221	-0.024
		orf19.1253	-0.042	0.085	0.083	-0.113	-0.093	-0.052	0.428	0.049	0.101	0.257	-0.116	0.348	0.056	0.113	0.202	0.197	-0.051
		orf19.1254	0.09	0.046	-0.106	-0.062	-0.109	-0.162	0.371	0.444	0.431	0.179	0.274	-0.147	0.343	0.28	0.59	1.283	1.115
		orf19.1254	0.301	0.103	0.18	-0.054	0.1	0.043	0.521	0.064	0.35	0.378	0.033	-0.057	0.171	0.075	0.745	1.162	0.938
		orf19.1255	-0.149	-0.09	-0.186	0.115	-0.31	-0.074	-0.008	0.109	0.187	0.059	-0.046	0.039	0.132	0.006	0.235	-0.248	0.196
		orf19.1255	0.147	-0.116	0.056	-0.11	-0.166	-0.115	0.019	0.277	-0.031	-0.006	0.325	-0.161	0.106	-0.064	0.064	-0.323	-0.058
		orf19.1257	-1.244	0.185	-0.322	-0.057	-0.737	0.333	0.102	0.1	-0.104	0.073	-0.124	0.131	0.101	0.17	0.588	0.23	0.015
		orf19.1257	0.01	-0.622	0.047	-0.087	0.07	-0.113	-0.543	-0.293	-0.229	-0.308	-0.209	0.03	-0.097	-0.248	-2.364	-2.096	-1.541
		orf19.1258	-0.626	-0.619	-0.331	-0.392	-0.684	-0.352	-0.097	-0.309	-0.218	-0.463	-0.254	-0.343	-0.331	-0.238	-1.924	-1.769	1.112
		orf19.1258	-0.514	-0.514	-0.241	-0.25	-0.425	-0.494	0.045	-0.47	-0.06	-0.301	-0.324	-0.432	-0.34	-0.316	-1.905	-1.683	1.078
		orf19.1259	-0.384	0.016	-0.119	0.076	-0.037	-0.008	-0.131	0.039	0.025	-0.033	0.462	0.012	0.029	0.146	0.279	0.467	0.534
		orf19.1259	-0.064	-0.002	-0.024	-0.027	0.193	0.116	-0.026	0.09	-0.013	-0.045	0.291	-0.022	0.022	0.127	0.099	0.509	0.659
		orf19.1260	-0.131	-0.014	-0.11	-0.127	-0.199	-0.016	-0.401	-0.191	-0.136	0.004	0.125	-0.274	-0.151	-0.165	1.634	1.393	1.446
		orf19.1260	-0.035	0.115	0.065	0.213	-0.098	-0.204	-0.265	-0.028	-0.127	0.02	-0.135	0.057	-0.158	-0.085	1.1	0.94	1.532
		orf19.1261	-0.319	-0.331	-0.086	-0.117	-0.225	-0.167	-0.584	-0.113	-0.264	-0.646	0.124	-0.156	-0.482	-0.059	-0.06	-0.015	-0.046
		orf19.1261	-0.279	-0.179	-0.021	-0.089	-0.211	-0.21	-0.374	0.019	-0.092	-0.246	-0.119	-0.09	-0.223	0.064	-0.026	-0.087	0.294
		orf19.1263	-0.525	-0.432	-0.354	-0.724	-0.364	-0.246	-0.882	-1.035	-0.72	-1.165	-0.846	-0.123	-1.128	-0.675	-0.699	-1.037	-0.755
		orf19.1263	-0.109	-0.122	-0.117	-0.329	-0.174	0.132	-0.501	-0.693	-0.706	-0.743	-0.797	0.062	-0.8	-0.457	-0.466	-0.512	-0.433
		orf19.1264	-0.503	-0.123	-0.392	-0.383	-0.27	0.208	-0.549	-0.08	-0.359	-0.538	-0.518	0.47	-0.674	-0.202	-2.58	-1.047	0.562
		orf19.1264	-0.491	-0.203	-0.386	-0.31	-0.23	0.096	-0.533	-0.381	-0.263	-0.699	-0.723	0.333	-0.608	-0.228	-2.727	-1.15	NA
		orf19.1264	-0.445	-0.23	-0.376	-0.479	-0.087	0.095	-0.375	-0.347	-0.106	-0.503	-0.66	0.362	-0.703	-0.126	-2.537	-0.969	0.153
		orf19.1264	-0.34	-0.352	-0.354	-0.423	-0.074	-0.157	-0.628	-0.334	-0.353	-0.728	-0.874	0.222	-0.721	-0.248	-2.921	-1.182	0.657
		orf19.1264	-0.234	-0.106	-0.312	-0.297	-0.022	0.022	-0.402	-0.368	-0.396	-0.559	-0.639	0.399	-0.538	-0.208	-2.727	-1.06	0.614
		orf19.1265	-0.087	0.071	-0.109	-0.037	-0.131	0.063	-0.022	-0.032	-0.103	-0.194	-0.147	-0.141	0.048	-0.036	0.403	1.696	0.697
		orf19.1265	-0.04	0.038	0.095	-0.05	0.076	-0.063	0.159	0.115	-0.021	-0.246	0.12	0.044	-0.216	-0.16	0.203	1.46	0.698
		orf19.1266	0.135	0.092	0.002	0.073	0.045	0.01	0.315	0.075	0.199	0.37	0.105	0.093	0.109	-0.103	0.494	0.947	0.839
		orf19.1266	0.367	0.19	0.006	0.156	0.136	0.165	0.368	0.259	-0.029	0.311	0.162	-0.074	0.11	0.068	0.673	0.864	1.057
		orf19.1267	0.072	-0.096	0.057	-0.038	0.178	-0.029	0.163	0.093	0.03	0.244	-0.023	0.083	0.007	0.135	-0.234	-0.072	0.925
		orf19.1267	0.225	-0.134	0.103	-0.008	0.239	-0.103	0.133	-0.219	-0.103	0.309	0.121	-0.024	0.008	0.092	-0.477	-0.089	0.737
		orf19.1267.1	-0.818	-0.349	-0.504	-0.074	-0.34	-0.268	-0.276	-0.09	-0.013	-0.239	0.158	-0.02	-0.199	-0.056	-0.186	0.136	0.034
		orf19.1267.1	-0.356	-0.205	-0.205	0.075	-0.272	-0.246	-0.012	0.203	0.146	0.12	-0.058	-0.089	-0.005	0.014	-0.072	0.229	0.266
		orf19.1268	-0.545	-0.279	-0.014	0.238	-0.212	-0.061	-0.029	0.161	-0.028	0.269	0.01	-0.02	0.178	-0.089	-0.362	-0.691	-0.48
		orf19.1268	0.274	0.155	0.206	-0.879	-0.052	0.1	-0.035	0.18	-0.155	0.036	0.11	0.03	0.278	0.006	-0.93	-0.482	-0.112
		orf19.1270	0.036	-0.319	-0.043	0.245	-0.01	-0.212	0.185	0.218	0.137	0.322	0.342	0.028	0.472	0.172	1.555	1.657	0.12
		orf19.1270	0.18	0.043	0.025	0.034	0.213	0.048	0.365	0.428	0.543	0.261	0.307	0.199	0.535	0.086	1.659	2.183	0.319
		orf19.1272	-0.181	-0.187	-0.202	-0.201	-0.219	-0.045	-0.142	-0.316	-0.215	-0.213	-0.291	0.044	-0.098	-0.099	-0.17	-0.275	-0.115
		orf19.1272	-0.149	0.076	-0.022	0.286	-0.131	-0.025	0.079	-0.073	-0.135	0.149	-0.01	0.096	0.002	-0.063	0.064	-0.154	-0.003
		orf19.1273	-0.282	-0.115	-0.059	-0.067	-0.248	0.033	-0.153	-0.184	-0.171	-0.091	-0.046	-0.012	-0.086	0.038	0.134	0.303	-0.055
		orf19.1273	-0.28	0.128	0.06	0.068	-0.217	-0.187	-0.177	-0.029	-0.093	-0.014	-0.05	0.035	-0.035	0.079	0.091	0.398	-0.169
		orf19.1274	-0.268	0.099	-0.145	-0.127	-0.412	0.174	0.09	0.198	0.196	0.095	-0.157	0.008	0.072	0.091	0.239	-0.235	0.136
		orf19.1274	0.024	0.085	-0.032	-0.095	-0.25	-0.1	-0.005	0.111	0.218	0.005	-0.025	0.196	0.033	0.098	0.13	-0.126	0.065
		orf19.1275	-0.235	0.065	-0.204	-0.008	-0.182	-0.097	0.317	0.261	0.347	0.485	0.235	-0.096	0.159	0.091	-0.259	-0.326	1.078
		orf19.1275	0.054	-0.21	0.014	-0.099	0.062	-0.152	0.155	0.049	0.432	0.149	-0.116	0.164	0.128	0.103	-0.41	-0.255	1.331
		orf19.1276	-0.086	-0.391	-0.304	-0.31	-0.243	-0.356	-0.354	-0.146	0.245	-0.221	0.165	0.134	-0.269	-0.054	-0.39	-0.276	0.468
		orf19.1276	0.088	-0.124	-0.23	-0.354	-0.103	-0.119	-0.06	0.045	0.157	-0.158	0.205	0.11	0.042	0.045	-0.356	-0.406	0.21
		orf19.1277	-0.575	-0.36	-0.469	-0.687	-0.297	-0.431	-0.555	-0.958	-0.454	-0.713	-0.656	-0.409	-0.84	-0.563	-1.653	-1.735	-1.206
		orf19.1277	-0.219	-0.209	-0.216	-0.228	-0.206	0.095	-0.079	-0.253	-0.349	-0.163	-0.604	0.09	-0.293	-0.122	-1.411	-1.609	-0.393
		orf19.1277	0.043	0.063	-0.091	-0.056	-0.004	0.231	-0.015	-0.442	-0.187	-0.129	-0.501	0.048	-0.426	-0.122	-1.36	-1.599	-0.458
		orf19.1277	0.188	-0.052	0.043	0.043	0.027	0.221	0.044	-0.489	-0.201	0.163	-0.451	0.137	-0.141	-0.035	-1.287	-1.307	-0.376
		orf19.1277	0.222	-0.37	0.118	-0.321	0.182	0.049	-0.209	-0.798	-0.379	-0.315	-0.654	-0.049	-0.328	-0.261	-1.551	-1.571	-0.88
		orf19.1279	-0.318	-0.237	-0.236	-0.142	-0.097	-0.161	0.254	-0.165	0.278	0.213	0.076	-0.032	0.004	-0.143	0.333	0.113	0.154
		orf19.1279	-0.036	-0.57	-0.176	-0.467	0.02	-0.151	0.182	-0.03	0.081	0.064	0.017	-0.088	0.034	-0.044	0.349	0.246	-0.261
		orf19.1280	-0.589	-0.533	-0.333	-0.469	-0.456	-0.331	-0.759	-0.307	-0.005	-0.391	-0.305	-0.255	-0.22	-0.325	-0.208	-0.194	-0.183
		orf19.1280	0.136	0.145	0.091	-0.075	0.143	0.076	-0.241	0.011	0.237	-0.068	-0.116	0.046	-0.097	0.093	0.159	0.069	0.089
		orf19.1281	-0.462	0.072	-0.094	-0.098	-0.139	0.035	0.017	0.219	0.005	-0.072	0.141	-0.01	-0.041	-0.097	0.169	-0.239	-0.172
		orf19.1281	-0.008	-0.15	0.108	0.166	-0.111	-0.084	-0.14	0.131	0.073	-0.096	-0.067	0.079	-0.166	-0.107	0.167	-0.207	-0.368
		orf19.1282	-0.116	-0.139	-0.136	-0.042	-0.071	0.079	-0.474	-0.383	-0.448	-0.297	-0.385	-0.075	-0.313	-0.168	-0.158	-0.098	-1.044
		orf19.1282	-0.077	-0.261	-0.044	0.067	0.146	-0.048	-0.428	-0.268	-0.099	-0.309	-0.393	0.031	-0.219	-0.181	-0.105	-0.111	-1.005
		orf19.1283	-0.399	-0.291	-0.146	0.061	-0.28	-0.115	-0.367	-0.336	-0.064	-0.342	0.149	0.025	-0.163	-0.126	-0.44	0.405	-0.878
		orf19.1283	-0.137	-0.13	-0.11	-0.333	-0.058	-0.239	-0.503	-0.349	-0.211	-0.49	-0.059	-0.239	-0.311	-0.233	-0.653	0.164	-0.91
		orf19.1285	-0.237	0.019	-0.1	0.167	-0.117	-0.139	0.253	0.544	0.45	0.059	0.395	0.199	0.334	0.369	0.362	0.304	1.122
		orf19.1285	-0.036	-0.233	-0.016	-0.064	-0.042	-0.159	0.066	0.376	0.35	0.16	0.059	0.078	0.455	0.383	0.187	0.287	1.336
		orf19.1286	0.281	NA	0.068	0.506	-0.719	-0.08	-1.433	NA	-0.278	-1.185	-0.202	0.161	-1.054	-0.083	0.602	-0.682	-0.144
		orf19.1286	NA	0.101	0.083	-0.011	0.259	-0.232	-0.867	-0.996	-1.239	-0.867	-0.337	0.196	-0.327	-0.573	-0.476	-0.301	-0.056
		orf19.1287	-0.69	-0.221	-0.319	-0.249	-0.206	0.001	-0.865	-0.448	-0.377	-0.433	-0.593	-0.191	-0.303	-0.295	-1.719	-2.706	-1.082
		orf19.1287	-0.316	-0.141	-0.173	-0.558	-0.167	-0.233	-1.112	-0.255	-0.331	-0.725	-0.27	-0.03	-0.53	-0.394	-2.159	-2.684	-1.181
		orf19.1288	0.09	0.16	0.091	0.172	0.089	-0.033	0.577	0.29	0.234	0.475	0.294	0.199	0.42	0.223	-0.454	-1.349	1.795
		orf19.1288	0.337	-0.025	0.134	0.282	0.139	0.008	0.6	0.076	0.147	0.562	0.121	-0.026	0.401	0.163	-0.439	-1.486	1.542
		orf19.1289	-0.132	-0.314	-0.044	-0.388	-0.109	-0.032	-0.239	-0.143	-0.177	-0.263	-0.105	-0.087	-0.013	-0.022	-0.155	-0.017	-0.302
		orf19.1289	0.171	-0.025	0.094	0.118	0.208	0.116	0.301	0.025	-0.086	0.216	0.157	0.075	0.1	0.114	-0.017	0.252	-0.012
		orf19.1290	-0.632	-0.251	-0.198	-0.495	-0.563	-0.044	-0.083	-0.737	-0.177	-0.16	-0.707	-0.312	-0.311	-0.213	-0.034	-0.027	-0.757
		orf19.1290	-0.167	-0.359	-0.032	-0.384	-0.277	0.029	0.087	-0.637	-0.266	0.176	-0.651	-0.176	-0.028	-0.082	0.183	0.221	-0.293
		orf19.1290	0.052	-0.056	-0.02	0	-0.08	0.168	0.294	-0.419	-0.091	0.253	-0.377	-0.007	0.154	0.156	0.403	0.429	-0.286
		orf19.1290	0.055	-0.549	-0.009	-0.798	-0.005	-0.486	-0.442	-0.514	-0.413	-0.407	-0.591	-0.044	-0.399	-0.258	-0.277	0.258	-0.804
		orf19.1290	0.246	-0.133	0.089	-0.294	0.339	-0.227	0.08	-0.451	-0.153	0.108	-0.317	-0.018	-0.031	-0.062	0.001	0.329	-0.573
		orf19.1291	0.037	0.154	0.213	-0.047	-0.062	0.018	-0.269	-0.102	-0.195	-0.142	-0.008	0.044	-0.299	-0.162	-0.133	-0.458	-0.485
		orf19.1291	0.064	0.069	0.218	0.12	0.102	0.024	-0.014	0.14	-0.011	0.044	0.287	0.147	0.111	0.201	-0.188	0	0.139
		orf19.1295	-0.364	-0.192	-0.189	-0.131	-0.342	-0.126	-0.429	-0.211	-0.332	-0.448	-0.231	-0.115	-0.254	-0.192	-0.125	-0.059	0.034
		orf19.1295	-0.141	-0.085	0.013	-0.212	-0.021	-0.107	-0.397	-0.353	-0.288	-0.378	-0.274	-0.051	-0.42	-0.266	-0.129	-0.069	0.15
		orf19.1296	-0.493	-0.497	-0.295	-0.488	-0.372	-0.144	-0.476	-0.338	-0.327	-0.395	-0.373	-0.301	-0.366	-0.144	-0.801	-0.882	-1.041
		orf19.1296	-0.369	-0.365	-0.09	-0.328	-0.239	-0.095	-0.579	-0.5	-0.402	-0.42	-0.364	-0.333	-0.18	-0.31	-0.66	-1.079	-1
		orf19.1297	0.103	0.142	-0.062	0.059	0.039	-0.11	0.6	0.265	0.138	0.07	0.121	-0.245	0.104	0.049	-0.187	-0.682	0.423
		orf19.1297	0.293	0.238	0.189	0.118	0.134	0.331	0.421	0.363	0.417	0.38	0.142	0.203	0.352	0.287	0.002	-0.192	1.116
		orf19.1298	-0.422	-0.418	-0.125	-0.548	-0.226	-0.107	-0.744	-0.548	-0.409	-0.51	-0.409	-0.53	-0.476	-0.448	-0.685	-1.115	-0.973
		orf19.1298	-0.128	-0.181	-0.101	-0.252	-0.222	-0.226	-0.409	-0.322	-0.108	-0.537	-0.154	0.024	-0.38	-0.154	-0.523	-0.836	-0.614
		orf19.1299	-0.158	-0.157	-0.216	-0.435	-0.312	-0.14	0	-0.142	-0.029	0.222	-0.111	-0.242	-0.11	-0.157	-0.076	0.553	0.345
		orf19.1299	0.125	-0.286	0.01	-0.378	0.055	-0.172	0.103	-0.121	-0.091	0.104	0.053	-0.053	0.19	-0.023	-0.02	0.642	0.535
		orf19.130	-0.071	-0.028	-0.199	-0.348	0.065	-0.045	0.004	-0.054	0.022	0.099	-0.086	-0.076	-0.099	-0.008	-0.397	-0.384	0.215
		orf19.130	0.053	-0.114	0.065	0.145	0.129	-0.031	0.324	-0.038	0.111	0.323	-0.15	-0.108	0.061	0.033	-0.129	-0.248	0.509
		orf19.1300	-0.041	0.145	-0.008	0.066	0.1	0.117	-0.091	0.175	0.017	-0.025	-0.107	0.201	0.029	0.01	-0.076	-0.521	-0.409
		orf19.1300	0.121	0.139	0.025	0.087	0.175	0.025	-0.097	0.218	0.139	0.018	0.077	0.224	0.055	0.104	-0.145	-0.554	-0.221
		orf19.1301	-0.261	-0.505	-0.221	-0.483	-0.173	-0.315	-0.825	-0.422	0.001	-0.246	-0.3	-0.303	-0.544	-0.265	-0.015	0.833	-0.569
		orf19.1301	-0.208	-0.294	0.019	0.006	-0.102	-0.363	-0.282	-0.049	-0.077	-0.106	-0.02	-0.104	-0.102	-0.05	-0.011	1.088	-0.485
		orf19.1302	-1.962	-1.316	-0.947	-1.622	-1.556	-1.358	-1.677	-1.441	-0.738	-1.411	-1.079	-1.504	-1.522	-1.346	-1.587	-1.743	NA
		orf19.1302	-1.929	-1.315	-0.845	-1.659	-1.506	-1.247	-1.582	NA	-0.766	NA	-1.301	-1.42	-1.539	NA	-1.539	-1.6	-1.771
		orf19.1302	-1.918	-1.376	-0.805	-1.497	-1.473	-1.375	NA	NA	-0.772	NA	-1.156	-1.252	-1.545	NA	-1.403	NA	NA
		orf19.1302	-1.87	-1.277	-0.788	-1.594	-1.454	NA	-1.492	NA	-0.808	-1.134	-1.118	-1.293	NA	-1.341	-1.712	-1.638	NA
		orf19.1302	-1.774	-1.208	-0.777	-1.646	-1.441	-1.04	-1.499	NA	-0.902	-1.367	-1.2	-1.321	NA	-1.244	-1.581	-1.557	NA
		orf19.1303	-0.172	0.069	-0.071	0.298	-0.072	0.156	-0.211	0.016	-0.04	0.094	0.063	-0.072	0.151	0.056	0.244	-0.422	-0.179
		orf19.1303	-0.037	0.233	0.033	0.133	0.085	-0.006	-0.242	0.214	0.061	-0.106	0.097	0.255	0.057	0.146	-0.024	-0.373	-0.15
		orf19.1304	-0.154	0.227	-0.167	0.048	-0.107	0.173	-0.324	-0.003	-0.093	0.072	0.072	0.031	-0.11	-0.226	0	-0.778	-0.673
		orf19.1304	0.25	-0.144	0.043	-0.267	0.387	-0.153	-0.689	-0.225	-0.33	-0.354	-0.202	-0.21	-0.391	-0.291	-0.467	-1.111	-1.202
		orf19.1305	-0.008	0.041	-0.091	0.109	0.197	0.128	-0.346	0.074	-0.042	-0.124	0.119	0.043	-0.241	-0.138	-0.028	-0.734	-0.726
		orf19.1305	0.166	0.128	0.099	0.264	0.308	0.307	-0.511	-0.17	-0.126	-0.117	-0.123	-0.058	-0.027	-0.127	-0.204	-0.8	-0.684
		orf19.1306	-0.381	-0.095	-0.373	-0.209	-0.465	0.046	-0.027	-0.087	-0.136	0.304	-0.227	0.029	-0.09	-0.214	0.808	-0.255	-1.02
		orf19.1306	0.012	-0.011	-0.134	0.106	-0.096	0.021	0.141	-0.153	-0.11	0.312	-0.232	-0.05	-0.06	-0.069	0.089	-0.209	-0.967
		orf19.1307	-0.197	-0.452	0.139	0.032	0.017	-0.047	0.155	-0.01	0.286	0.423	-0.261	0.233	0.35	0.116	-0.237	-0.299	0.893
		orf19.1307	-0.175	0.319	0.326	0.017	0.153	0.077	0.43	0.355	0.345	0.419	0.494	0.416	0.425	0.35	0.199	-0.276	1.206
		orf19.1308	-0.063	0.098	-0.015	-0.004	-0.105	0.058	0.026	0.099	-0.034	-0.121	-0.06	0.106	-0.042	0.06	-0.149	-0.297	0.879
		orf19.1308	0.231	-0.019	0.053	-0.196	0.151	-0.034	-0.153	-0.321	0.047	-0.293	-0.249	0.035	-0.056	-0.093	-0.445	-0.445	0.612
		orf19.1309	-0.493	0.36	-0.204	0.103	-0.247	0.089	-1.62	-0.413	-1.018	-1.731	-0.268	-0.205	-1.188	-0.556	-1.658	0.298	-1.936
		orf19.1309	-0.061	-0.082	-0.132	0.182	-0.079	0.09	-1.86	-0.912	-0.988	-1.663	-0.783	-0.306	-1.223	-0.42	-1.948	0.004	-1.892
		orf19.131	-1.033	-0.744	-0.162	-0.124	-0.808	-0.529	-0.535	-0.851	0.044	-0.617	-0.602	-0.322	-0.373	-0.279	-0.626	-1.373	-0.831
		orf19.131	-0.293	0.012	-0.132	0.079	-0.336	-0.058	0.089	-0.472	-0.013	-0.029	0.146	-0.029	-0.085	-0.141	-0.265	-0.638	-0.814
		orf19.131.2	0.151	0.027	0.036	0.103	0.112	0.118	0.172	0.173	-0.068	0.113	-0.172	0.098	0.071	0.177	-0.088	-0.06	0.057
		orf19.131.2	0.497	0.483	0.04	0.271	0.213	-0.014	0.507	0.578	0.725	0.311	0.295	0.125	0.584	0.304	1.739	2.39	0
		orf19.1310	-0.419	0.288	-0.188	-0.198	-0.277	0.011	-0.266	-0.337	-0.02	-0.204	-0.326	0.007	-0.579	-0.218	-0.115	-0.186	-0.427
		orf19.1310	-0.124	-0.052	-0.048	-0.722	-0.222	-0.126	-0.682	-0.581	-0.182	-0.777	-0.275	-0.322	-0.629	-0.462	-0.794	-0.338	-0.656
		orf19.1310	-0.075	-0.006	-0.041	-0.813	-0.102	0.332	-0.509	-0.662	-0.503	-0.37	-0.35	-0.321	-0.35	-0.343	-0.385	-0.275	-0.474
		orf19.1310	0.003	0.003	-0.038	-0.319	-0.075	0.384	-0.24	0.067	-0.077	-0.311	-0.118	0.003	-0.205	-0.285	-0.477	-0.051	-0.206
		orf19.1310	0.082	0.225	-0.033	0.089	-0.064	0.322	-0.08	-0.052	-0.214	-0.004	-0.043	-0.054	-0.115	-0.185	-0.107	0.177	-0.31
		orf19.1311	-0.498	0.126	0.007	-0.03	-0.453	-0.373	0.231	0.094	-0.048	-0.1	0.461	-0.233	NA	-0.058	0.971	0.691	NA
		orf19.1311	-0.09	NA	0.08	0.047	-0.089	0.094	-0.89	-2.299	-0.38	NA	0.285	0.483	-0.842	-0.306	-0.648	-0.654	-0.324
		orf19.1313	0.233	0.158	0.088	0.03	0.114	-0.043	-0.264	-0.236	-0.441	-0.522	-0.257	-0.09	-0.391	-0.162	0.376	0.255	-0.896
		orf19.1313	0.309	-0.28	0.13	-0.123	0.194	0.166	-0.362	-0.421	-0.532	-0.342	-0.186	-0.222	-0.333	-0.383	0.204	0.211	-0.994
		orf19.1313	0.437	0.033	0.206	-0.001	0.197	0.275	-0.187	-0.283	-0.438	-0.34	-0.241	-0.263	-0.381	-0.155	0.457	0.232	-1.019
		orf19.1313	0.481	0.118	0.234	0.103	0.266	0.285	0.019	-0.334	-0.261	-0.079	-0.194	-0.034	-0.201	-0.271	0.401	0.329	-1.112
		orf19.1313	0.517	-0.103	0.249	0.197	0.291	0.064	-0.144	-0.438	-0.429	-0.277	-0.168	0.002	-0.286	-0.106	0.54	0.265	-0.851
		orf19.1314	-0.096	-0.273	0.128	0.23	0.055	-0.048	0.364	-0.059	-0.019	0.18	-0.336	0.047	0.061	0.047	0.092	-0.415	-0.385
		orf19.1314	0.249	0.018	0.182	-0.082	0.652	0.248	0.459	0.027	-0.077	0.24	-0.24	0.023	0.336	0.196	0.124	-0.252	0.04
		orf19.1317	0.013	-0.062	-0.115	-0.114	-0.268	-0.032	-0.002	-0.114	0.029	0.049	0.049	-0.168	0.093	-0.157	1.448	1.114	0.8
		orf19.1317	0.056	-0.27	0.029	-0.108	-0.078	-0.249	-0.071	0.164	0.182	-0.165	0.079	-0.225	0.205	0.164	1.004	1.291	1.278
		orf19.1318	-0.327	-0.131	-0.14	0.067	-0.241	-0.184	0.207	-0.086	-0.161	-0.018	-0.2	-0.122	-0.077	0.033	0.115	-0.367	-0.107
		orf19.1318	-0.258	-0.347	-0.109	-0.241	-0.114	-0.139	-0.036	-0.302	-0.121	-0.009	-0.352	-0.13	-0.049	-0.093	-0.007	-0.32	-0.002
		orf19.1318	-0.038	-0.123	-0.089	0.162	-0.107	0.06	0.182	0.044	-0.117	0.029	-0.115	-0.089	0.089	0.112	0.191	-0.249	-0.079
		orf19.1318	0.008	-0.332	0.059	-0.293	-0.069	-0.262	-0.053	-0.305	-0.244	-0.224	-0.185	-0.178	-0.093	-0.234	0.122	-0.346	-0.144
		orf19.1318	0.09	-0.163	0.137	-0.199	-0.004	-0.044	0.091	0.107	-0.037	0.068	0.091	0.243	0.057	-0.06	0.11	-0.052	-0.096
		orf19.132	-0.403	-0.307	-0.196	-0.158	-0.339	-0.362	-0.183	-0.071	-0.113	-0.043	-0.129	0.135	-0.092	-0.021	-0.389	-0.529	-0.244
		orf19.132	-0.252	-0.349	-0.097	-0.245	-0.259	-0.253	-0.312	-0.046	-0.117	-0.159	0.077	-0.081	-0.108	-0.03	-0.487	-0.384	-0.369
		orf19.1321	2.653	1.893	1.741	1.317	-0.493	0.558	2.996	2.132	2.286	2.668	1.928	0.148	1.995	1.761	4.863	5.894	4.668
		orf19.1321	2.792	1.111	1.765	0.46	-0.311	-0.773	1.574	1.285	1.953	1.354	1.119	-0.361	1.637	1.043	5.88	5.439	4.062
		orf19.1321	2.817	0.181	2.226	0.772	-0.197	0.224	0.551	0.517	0.424	0.22	0.771	-0.115	1.02	-0.145	6.649	4.444	4.067
		orf19.1321	3.991	1.752	2.309	1.057	0.504	-0.025	2.728	2.036	2.605	2.129	1.611	0.154	2.472	1.858	NA	NA	NA
		orf19.1321	4.649	4.071	4.112	2.759	0.702	-0.164	3.685	3.133	3.79	3.388	3.165	0.47	3.505	2.726	8.002	7.448	6.16
		orf19.1323	-0.069	0.011	-0.15	-0.258	-0.081	-0.088	-0.116	-0.046	-0.013	-0.198	0.086	0.059	0.056	-0.102	-0.044	0.097	-0.178
		orf19.1323	-0.068	0.057	0.061	0.004	0.093	0.071	-0.058	-0.013	-0.087	-0.257	0.039	0.085	-0.116	-0.028	-0.215	0.077	-0.035
		orf19.1324	-0.688	0.061	-0.154	-0.012	-0.362	-0.087	-0.136	-0.184	-0.045	-0.002	0.148	-0.036	-0.031	0.051	-0.575	-0.403	-0.184
		orf19.1324	-0.199	-0.392	-0.014	-0.319	-0.054	-0.254	-0.404	-0.222	-0.225	-0.292	0.115	-0.152	-0.143	-0.103	-0.886	-0.495	-0.465
		orf19.1325	-0.222	0.323	-0.342	0.405	-0.081	0	0.391	0.492	0.029	0.12	0.346	0.048	0.079	-0.123	-0.188	-0.107	0.107
		orf19.1325	-0.02	-0.012	-0.222	-0.289	0.161	0.108	-0.017	0.517	-0.021	-0.184	-0.292	-0.015	-0.042	0.177	0.023	-0.262	0.051
		orf19.1325	-0.006	-0.043	-0.059	-0.09	0.194	-0.122	-0.056	0.262	0.176	-0.169	-0.049	-0.009	-0.112	0.013	-0.479	-0.44	-0.09
		orf19.1325	0.126	0.273	0.036	0.145	0.237	0.201	0.201	0.037	0.194	0.104	0.187	0.078	0.154	0.163	0.122	0.189	0.239
		orf19.1325	0.391	0.155	0.111	0.203	0.318	0.277	0.442	0.147	0.194	0.263	0.225	0.159	0.514	0.207	0.455	0.348	0.381
		orf19.1326	0.025	-0.133	-0.038	0.019	0.161	0.218	0.171	0.048	0.263	0.196	0.091	0.002	0.133	0.066	0.25	0.489	0.912
		orf19.1326	0.151	-0.094	0.074	0.154	0.249	0.163	0.297	0.511	0.157	0.245	0.158	0.122	0.42	0.224	0.125	-0.05	0.395
		orf19.1327	2.603	4.58	0.822	3.36	-0.237	0.046	4.634	3.273	3.658	4.002	3.519	0.551	3.578	3.064	8.51	8.681	7.467
		orf19.1327	2.922	1.614	1.064	0.697	-0.022	-0.055	NA	NA	NA	2.281	1.708	0.131	NA	1.827	NA	NA	NA
		orf19.1327	3.225	2.489	1.131	0.872	0.022	-0.093	3.767	2.14	3.069	1.203	0.623	-0.155	3.135	2.172	NA	NA	4.984
		orf19.1327	3.307	3.901	1.237	2.94	0.091	-0.093	3.911	3.313	3.768	3.689	3.51	0.251	3.58	2.962	8.133	8.491	8.095
		orf19.1327	4.122	2.93	2.774	1.982	0.581	0.506	3.875	2.756	3.219	3.303	2.523	0.265	3.357	2.388	6.46	7.135	6.7
		orf19.133	-0.39	0.245	-0.041	-0.387	-0.244	0.105	-0.451	0.397	0.209	-0.208	0.139	0.045	0.266	0.349	0.15	-0.261	-0.467
		orf19.133	0.363	0.447	0.184	0.2	NA	-0.326	-0.252	NA	0.15	-0.173	-2.414	0.374	-0.576	NA	NA	-1.176	-0.115
		orf19.1330	-0.072	0.107	-0.026	0.058	0.036	-0.006	0.535	0.16	0.138	0.384	0.023	0.029	0.318	0.082	-0.232	-0.406	0.058
		orf19.1330	0.512	0.248	0.104	0.193	0.391	0.072	0.502	0.087	0.481	0.265	0.16	0.096	0.211	0.117	-0.406	-0.495	-0.061
		orf19.1331	-0.065	-0.346	-0.05	-0.203	-0.178	-0.414	1.085	-0.019	0.08	0.621	-0.146	0.207	0.09	0.009	0.231	-0.068	0.646
		orf19.1331	0.185	-0.395	0.107	-0.191	-0.042	-0.154	1.073	-0.266	-0.03	0.603	-0.131	-0.119	0.208	0.059	0.452	0.026	0.49
		orf19.1332	0.244	-0.028	0.184	0.212	0.303	0.075	0.345	0.046	0.038	0.333	0.026	0.222	0.183	0.282	0.671	0.917	0.542
		orf19.1332	0.513	-0.08	0.242	0.054	0.361	-0.019	0.372	-0.116	-0.163	0.372	0.035	0.111	0.195	0.175	0.589	0.916	0.366
		orf19.1333	0.084	0.556	-0.034	0.331	0.072	0.675	0.785	-0.022	0.035	0.792	0.074	0.089	0.2	0.085	1.092	0.755	-0.068
		orf19.1333	0.416	-0.009	0.2	0.227	0.233	-0.111	0.581	0.064	0.066	0.349	0.112	0.09	0.126	0.124	0.581	0.498	-0.102
		orf19.1333	0.47	-0.496	0.246	-0.473	0.358	-0.067	0.405	-0.668	-0.324	-0.036	-0.453	-0.341	-0.193	-0.204	0.492	0.332	-0.851
		orf19.1333	0.763	-0.139	0.318	-0.125	0.654	-0.091	0.507	-0.04	0.033	0.197	0.076	0.007	0.111	0.093	0.574	0.651	0.016
		orf19.1333	1.191	-0.279	0.46	-0.015	1.09	0.016	0.443	-0.105	-0.046	0.215	0.149	0.014	0.085	-0.062	0.501	0.576	-0.409
		orf19.1334	0.157	-0.289	-0.011	0.123	0.135	0.034	-1.968	-1.335	-1.233	-1.975	-1.379	-0.193	-1.618	-0.568	-2.192	-2.739	-4.377
		orf19.1334	0.23	-0.36	0.062	-0.478	0.222	-0.033	-1.65	-0.67	-0.858	-1.768	-0.891	-0.432	-0.874	-0.511	-1.962	-1.528	-3.16
		orf19.1335	-0.417	-0.247	-0.241	-0.363	-0.352	-0.118	-0.615	-0.163	-0.274	-0.574	-0.35	-0.26	-0.267	-0.449	-0.293	-0.55	-1.081
		orf19.1335	0.064	0.229	0.15	-0.061	0.003	0.171	-0.349	-0.127	-0.223	-0.326	-0.022	-0.029	-0.222	-0.153	-0.125	-0.404	-0.745
		orf19.1336	0.07	-0.376	-0.042	-0.295	-0.021	-0.203	0.047	0.244	-0.015	0.014	0.144	0.007	-0.003	-0.074	0.165	0.686	0.673
		orf19.1336	0.268	0.059	0.035	0.279	0.247	0.137	0.304	0.174	0.255	0.47	0.22	0.09	0.292	0.198	0.62	0.934	0.803
		orf19.1336.2	-0.154	0.031	-0.156	-0.004	-0.16	0.128	-0.194	0.038	-0.112	-0.104	-0.316	-0.038	0.014	-0.083	0.046	0.082	-0.196
		orf19.1336.2	0.06	0.145	0.058	0.174	0.175	-0.081	-0.083	-0.136	-0.169	-0.092	-0.331	-0.001	-0.204	-0.095	0.068	0.168	-0.4
		orf19.1338	-0.014	-0.273	-0.158	-0.099	-0.128	-0.18	0.275	-0.101	0.102	0.245	-0.108	-0.012	0.214	0.176	0.024	0.184	0.613
		orf19.1338	0.229	-0.103	0.089	0.169	0.05	-0.095	0.459	-0.153	0.062	0.45	0.023	-0.072	0.193	0.095	0.088	0.318	0.495
		orf19.1339	-0.161	-0.512	-0.15	-0.296	-0.066	-0.247	0.107	0.079	0.399	0.194	0.157	0.008	0.27	0.165	-1.043	-0.423	0.863
		orf19.1339	0.117	-0.47	0.015	-0.484	0.071	-0.318	-0.188	-0.143	0.116	-0.115	-0.003	-0.162	-0.078	-0.115	-1.37	-0.586	0.796
		orf19.134	0.144	-0.111	0.101	0.401	0.685	0.164	0.534	-2.615	0.411	-0.318	-0.725	0.11	0.752	-0.26	-0.197	NA	0.34
		orf19.134	0.539	0.976	0.285	0.513	NA	NA	NA	0.226	NA	-0.098	NA	0.248	-0.329	-0.204	NA	-0.819	0.178
		orf19.1340	0.174	0.131	-0.118	0.006	0.036	0.119	-0.06	-0.277	-0.382	-0.016	-0.196	0.012	-0.507	-0.131	0.104	0.47	1.009
		orf19.1340	0.364	-0.086	0.074	0.06	0.188	0.143	0.18	-0.526	-0.25	0.614	-0.272	0.231	0.253	0.211	0.477	0.842	1.172
		orf19.1341	-0.718	-0.063	-0.261	0.127	-0.388	0.02	0.128	0.113	0.118	0.102	-0.137	0.077	-0.036	-0.296	0.005	-0.313	0.079
		orf19.1341	-0.194	0.37	-0.01	0.223	-0.262	0.479	0.436	-0.19	0.306	0.425	0.025	0.116	-0.096	0.2	0.991	-0.027	0.156
		orf19.1341	0.125	-0.051	0.035	-0.306	0.031	0.239	0.091	-0.493	-0.24	-0.078	-0.284	0.122	0.09	-0.069	0.358	-0.412	0.062
		orf19.1341	0.145	-0.37	0.168	-1.177	0.126	-0.166	-0.6	-0.334	-0.36	-0.532	-0.413	0.106	-0.702	-0.496	-0.76	-0.991	-0.759
		orf19.1341	0.382	0.122	0.231	-0.159	0.477	-0.132	0.058	-0.073	-0.199	-0.163	-0.257	0.428	-0.326	-0.177	-0.277	-0.413	-0.235
		orf19.1342	-0.125	-0.024	-0.018	-0.023	-0.089	-0.043	-0.171	-0.01	-0.268	-0.097	-0.009	-0.09	-0.152	0.009	-0.696	-0.613	-0.172
		orf19.1342	-0.04	-0.052	0.031	-0.064	-0.061	0.179	-0.137	-0.08	-0.252	-0.111	-0.064	0.016	-0.079	0.017	-0.791	-0.503	-0.226
		orf19.1343	0.133	0.122	0.006	0.115	0.132	0.023	0.203	-0.057	0.097	0.073	0.015	0.129	0.057	0.058	-0.172	-0.237	0.292
		orf19.1343	0.312	0.097	0.216	0.021	0.227	0.089	0.247	-0.042	0.12	0.265	0.081	0.269	0.159	0.085	-0.129	-0.09	0.202
		orf19.1344	-0.47	-0.403	-0.332	-0.156	-0.51	-0.217	0.59	0.18	0.196	0.334	0.51	-0.155	0.17	-0.006	0.56	1.799	4.278
		orf19.1344	0.072	-0.527	0.01	-0.103	0.083	-0.421	0.782	0.118	0.094	0.269	0.377	-0.053	0.114	-0.168	0.477	1.687	4.29
		orf19.1345	-0.024	-0.334	-0.13	-0.068	-0.254	0.132	0.101	0.139	-0.199	0.108	0.486	0.303	0.515	0.269	1.754	2.065	-1.233
		orf19.1345	0.368	0.305	0.018	0.032	-0.034	-0.136	0.202	0.381	0.197	0.196	0.771	-0.048	0.396	0.423	1.611	1.978	-1.069
		orf19.1348	-0.366	0.528	-0.256	-0.374	-0.272	-0.8	0.054	0.243	-0.709	-0.155	0.098	-0.761	-2.149	-0.431	NA	-0.378	-0.466
		orf19.1348	-0.18	-0.302	-0.04	-0.279	NA	-0.613	-0.729	-0.6	-0.176	-0.893	-0.705	-0.321	-0.519	-0.525	-0.091	-0.687	-0.53
		orf19.1349	-0.356	-0.326	-0.014	-0.246	-0.262	-0.3	-0.124	-0.028	-0.306	-0.017	0.087	-0.015	0	-0.361	0.713	0.424	0.423
		orf19.1349	-0.241	-0.806	0.106	-0.656	-0.021	-0.494	-0.575	-0.611	-0.686	-0.784	-0.666	-0.02	-0.463	0.051	-0.648	-0.039	0.573
		orf19.135	-0.17	-0.283	-0.095	-0.193	-0.369	-0.074	0.023	-0.062	0.097	-0.01	-0.116	-0.183	-0.013	-0.014	-0.116	-0.085	0.557
		orf19.135	0.088	0.135	0.125	-0.22	0.262	0.033	0.375	0.425	0.275	0.204	0.323	0.23	0.162	0.063	0.297	0.271	0.539
		orf19.1350	-0.412	-0.485	-0.113	-0.343	-0.295	-0.038	0.042	-0.433	-0.179	-0.071	-0.191	-0.222	-0.203	-0.338	0.606	0.078	0.792
		orf19.1350	-0.082	0.045	-0.015	0.09	0.216	0.129	0.372	-0.086	-0.053	0.181	0.009	-0.123	0.203	-0.042	0.945	0.384	0.808
		orf19.1351	-0.538	0.319	-0.239	-0.321	-0.505	-0.334	-0.051	0.56	-2.971	0.854	-0.027	NA	NA	0.207	-0.06	0.827	NA
		orf19.1351	0.27	-0.552	0.019	-0.374	-0.412	-0.327	-1.944	-1.693	-1.215	-1.89	-1.167	-0.876	-1.423	-0.778	-0.834	0.215	-1.129
		orf19.1352	-0.08	0.108	0.016	0.119	0.212	-0.039	-0.328	-0.249	-0.248	-0.115	-0.263	0.143	-0.267	-0.151	0.553	0.315	-0.378
		orf19.1352	0.099	0.316	0.113	0.113	NA	0.364	-0.027	0.162	-0.021	-0.156	-0.026	0.252	-0.037	0.118	0.67	0.556	-0.151
		orf19.1353	-0.306	0.113	-0.061	-0.028	0.031	-0.077	0.091	-0.039	0.138	-0.31	0.055	0.002	-0.533	-0.116	0.458	-0.049	-0.282
		orf19.1353	NA	0.282	0.068	0.38	0.393	-0.216	-0.397	0.552	0.885	-0.234	0.118	0.388	0.043	0.209	-0.487	-0.114	-0.039
		orf19.1354	-0.217	-0.42	-0.247	-0.325	-0.199	-0.146	0.025	-0.439	-0.192	-0.384	-0.257	0.139	-0.331	-0.056	0.015	-1.183	-2.526
		orf19.1354	-0.177	-0.403	-0.163	-0.179	-0.175	-0.163	0.051	-0.395	-0.164	-0.301	NA	0.16	-0.308	-0.079	-0.005	-1.074	-2.474
		orf19.1354	-0.129	-0.59	-0.151	-0.176	-0.168	-0.178	-0.008	NA	-0.195	-0.267	NA	0.205	-0.379	-0.09	0.058	-1.089	-2.556
		orf19.1354	-0.09	-0.513	-0.115	-0.261	-0.151	-0.065	0.001	-0.39	-0.254	-0.312	NA	0.243	-0.128	NA	0.044	-1.07	-2.661
		orf19.1354	-0.067	-0.408	-0.111	-0.123	NA	-0.098	0.015	NA	-0.223	-0.252	NA	0.223	-0.408	-0.092	0.003	-0.989	-2.442
		orf19.1355	-0.085	0.23	0.102	0.106	-0.424	0.366	0.263	0.183	0.334	0.213	0.35	0.111	0.231	0.156	0.079	0.324	0.201
		orf19.1355	0.199	-0.189	0.176	-0.245	0.423	-0.075	-0.358	-0.147	-0.074	-0.418	-0.127	-0.121	-0.145	-0.111	-0.547	-0.277	-0.172
		orf19.1356	0.076	0.101	-0.09	0.168	0.024	-0.067	0.494	0.027	0.147	0.378	0.087	0.237	-0.082	-0.052	-0.052	-0.14	0.626
		orf19.1356	0.342	0.003	0.123	0.286	0.307	0.088	0.686	-0.18	0.004	0.585	-0.267	-0.018	0.211	0.164	-0.149	-0.244	0.532
		orf19.1357	0.192	0.036	-0.005	-0.183	0.163	0.209	-0.689	-0.398	-0.157	-0.347	-0.477	-0.054	-0.2	-0.13	-0.077	-0.514	-0.853
		orf19.1357	0.282	0.185	0.129	0.068	0.348	0.242	-0.635	-0.157	-0.092	-0.244	-0.401	0.14	-0.174	-0.058	0.055	-0.606	-0.615
		orf19.1358	-0.137	0.115	-0.13	-0.068	-0.012	-0.043	-0.009	-0.093	-0.056	-0.013	-0.212	-0.056	-0.163	-0.006	-0.209	-0.5	-0.459
		orf19.1358	-0.068	-0.023	-0.124	-0.106	0.069	0.011	-0.075	-0.063	-0.086	-0.061	-0.31	0.046	-0.072	-0.118	-0.077	-0.525	-0.224
		orf19.1359	-0.333	0.116	-0.139	0.167	-0.103	-0.024	0.163	0.397	0.203	0.242	0.393	0.144	0.156	0.31	-0.383	-0.287	0.246
		orf19.1359	-0.089	0.031	-0.019	0.12	0.029	-0.015	0.06	0.145	0.047	0.207	0.211	0.046	0.137	0.244	-0.608	-0.448	0.287
		orf19.136	-0.283	0.392	-0.151	0.262	0.038	0.175	0.41	0.036	0.111	0.295	-0.048	0.163	0.123	0.266	0.317	-0.093	1.027
		orf19.136	0.133	0.351	-0.099	0.334	0.09	0.509	0.476	0.063	0.026	0.496	0.04	0.294	0.132	0.108	0.677	0.26	0.819
		orf19.136	0.242	0.091	0.021	-0.024	0.111	-0.245	0.158	0.199	0.286	0.291	-0.141	0.059	0.06	0.023	0.22	-0.091	0.802
		orf19.136	0.264	0.11	0.136	0.139	0.324	0.055	0.164	0.061	0.38	0.38	-0.114	0.193	0.031	0.124	0.422	0.034	0.906
		orf19.136	0.596	0.235	0.185	0.244	0.821	0.226	0.403	0.023	0.327	0.505	0.094	0.286	0.08	0.079	0.381	0.041	0.895
		orf19.1360	-0.508	-0.164	-0.297	-0.484	-0.594	-0.326	-0.522	-0.247	-0.367	-0.405	-0.125	-0.05	-0.543	-0.204	-0.072	-0.88	-0.691
		orf19.1360	-0.439	-0.083	-0.172	-0.065	-0.372	-0.43	-0.687	-0.2	-0.407	-0.293	-0.012	-0.051	-0.318	-0.384	-0.297	-0.878	-0.473
		orf19.1360.1	-0.891	-0.352	-0.578	-0.523	-0.746	-0.634	-0.829	-0.715	-0.277	-0.599	-0.603	-0.749	-1.095	-0.828	-0.661	-0.764	-1.239
		orf19.1360.1	-0.485	-0.554	-0.363	-0.319	-0.598	-0.443	-0.494	-0.184	-0.068	-0.442	-0.25	-0.283	-0.178	-0.093	-0.45	0.014	-0.091
		orf19.1361	0.198	0.249	0.042	0.223	0.157	0.141	-0.323	0.119	-0.056	-0.117	0.046	0.057	-0.184	0.007	-0.075	-0.678	-0.177
		orf19.1361	0.344	0.162	0.078	0.074	0.312	NA	0.051	-0.011	0.103	0.051	-0.151	0.013	-0.07	-0.05	0.151	-0.162	0.008
		orf19.1362	-0.448	0.044	-0.018	0.006	-0.269	-0.028	-0.85	0.032	-0.316	-0.179	-0.129	-0.146	-0.19	-0.066	-0.104	-0.811	-0.922
		orf19.1362	-0.118	-0.028	-0.012	-0.214	0.007	-0.023	-0.842	0.131	-0.074	-0.257	0.305	0.05	-0.182	-0.102	-0.242	-0.735	-0.957
		orf19.1363	-0.632	0.171	-0.175	-0.344	-0.677	-0.344	-1.616	-0.148	-0.397	-0.644	-0.037	-0.182	-0.524	-0.37	0.495	-0.427	-0.691
		orf19.1363	-0.549	0.17	-0.157	0.013	-0.513	-0.022	-1.567	-0.154	-0.33	-0.337	-0.218	-0.267	-0.27	-0.347	0.746	-0.142	-0.752
		orf19.1363	-0.262	0.04	-0.042	-0.259	-0.308	0.011	-1.468	-0.183	-0.452	-0.435	0.087	-0.187	-0.333	-0.223	0.61	-0.233	-0.816
		orf19.1363	-0.245	0.111	0.075	-0.472	-0.053	-0.228	-1.787	-0.289	-0.574	-0.533	-0.269	-0.227	-0.68	-0.588	0.164	-0.622	-0.959
		orf19.1363	-0.091	0.371	0.123	-0.117	0.237	0.024	-1.42	-0.005	-0.336	-0.293	0.174	-0.106	-0.26	-0.268	0.824	-0.112	-0.594
		orf19.1364	0.024	-0.087	-0.238	-0.013	-0.182	-0.154	0.048	-0.371	0.165	0.398	-0.384	-0.042	-0.073	-0.026	-0.259	-0.324	-0.069
		orf19.1364	0.115	-0.091	-0.059	-0.144	-0.129	-0.136	0.083	-0.427	-0.017	0.022	-0.142	-0.118	-0.15	-0.057	-0.285	0.161	-0.259
		orf19.1365	-0.192	0.292	-0.107	0.326	-0.338	0.076	0.64	0.561	0.401	0.505	0.531	0.033	0.364	0.101	0.776	0.465	0.787
		orf19.1365	-0.037	0.667	-0.006	0.343	-0.061	0.173	0.898	0.51	0.678	0.816	0.491	0.127	0.727	0.424	0.979	0.74	1.054
		orf19.1365	0.099	0.21	0.065	0.067	0.043	0.069	0.901	0.353	0.707	1.01	0.412	-0.14	0.817	0.448	1.197	1.361	1.01
		orf19.1365	0.224	0.257	0.212	0.488	0.242	0.11	0.839	0.427	0.573	0.997	0.398	-0.013	0.712	0.285	0.689	0.534	1.328
		orf19.1365	0.611	0.252	0.393	0.171	0.478	-0.455	0.58	0.44	0.644	0.675	0.344	-0.037	0.708	0.469	0.568	0.563	1.052
		orf19.1366	-0.308	-0.173	0.153	-0.674	-0.533	0.192	-0.035	0.35	-0.142	0.018	0.052	0.371	0.997	0.243	-0.762	-0.798	-0.245
		orf19.1366	NA	NA	0.384	-0.196	NA	0.013	0.175	NA	0.741	-0.196	0.211	NA	NA	-3.231	0.167	NA	NA
		orf19.1367	-0.217	0.003	-0.101	-0.079	-0.235	-0.623	0.448	0.587	0.72	0.021	0.576	-0.278	0.424	0.172	1.135	1.056	-0.391
		orf19.1367	0.882	0.207	0.243	0.151	-0.068	-0.064	1.031	0.689	0.781	0.392	0.736	-0.012	0.704	0.316	1.444	1.48	0.026
		orf19.1368	-1.114	-0.225	-0.456	-0.335	-0.823	-0.236	1.269	0.396	0.744	0.921	0.331	0.045	0.725	0.369	0.556	0.015	-0.358
		orf19.1368	0.308	-0.929	-0.156	-1.255	0.067	-1.055	0.421	-0.479	-0.057	-0.328	-0.319	-0.71	-0.24	-0.2	-0.421	-0.247	-2.346
		orf19.1369	0.109	0.159	-0.179	0.049	0.082	-0.478	0.836	0.757	0.936	0.448	0.572	0.156	0.694	0.52	0.925	1.611	0.488
		orf19.1369	0.113	0.018	-0.038	0.447	0.558	0.1	1.163	0.844	0.935	0.833	0.519	0.055	1.098	0.38	1.214	1.82	1.021
		orf19.137	-0.097	-0.176	-0.107	-0.008	-0.148	-0.016	0.101	-0.291	0.071	0.325	-0.078	-0.161	0.058	-0.017	0.463	0.386	2.243
		orf19.137	0.017	-0.18	-0.062	0.086	0.079	-0.161	-0.066	-0.079	0.04	0.127	-0.116	-0.236	0.057	-0.007	0.357	0.352	2.639
		orf19.1370	-0.316	0.134	-0.006	0.186	-0.141	0.468	0.383	0.024	0.155	0.268	-0.048	0.062	0.291	0.197	0.668	0.426	0.383
		orf19.1370	-0.117	0.336	0.101	0.425	0.277	0.077	-0.14	0.233	-0.078	-0.108	0.08	0.174	0.722	0.054	-0.004	0.433	-1.932
		orf19.1370	0.321	0.016	0.125	0.435	0.957	-0.242	0.264	-0.024	0.374	0.576	0.184	0.25	-0.067	0.475	0.655	0.403	-2.019
		orf19.1370	0.349	-0.544	0.155	-0.239	NA	0.106	-1.842	-0.555	-0.25	-1.208	NA	0.022	NA	1.253	NA	-0.587	-1.641
		orf19.1370	NA	0.574	0.161	0.113	NA	0.544	0.47	-0.21	NA	-0.007	NA	0.039	NA	NA	NA	NA	-1.888
		orf19.1371	-0.248	-0.073	-0.169	-0.04	-0.043	0.243	0.407	0.025	0.128	0.365	-0.006	0.333	0.304	0.1	0.664	0.211	-0.069
		orf19.1371	-0.152	-0.087	-0.007	-0.16	-0.042	-0.015	-0.001	0.104	0.35	0.033	-0.089	0.116	0.043	0.053	0.301	-0.04	-0.225
		orf19.1371	-0.039	0.116	0.048	-0.402	0.058	-0.104	-0.156	-0.011	0.128	-0.041	-0.14	-0.01	-0.064	-0.051	0.043	-0.132	-0.324
		orf19.1371	0.175	-0.124	0.111	-0.151	0.083	0.07	0.123	-0.026	-0.098	-0.038	-0.185	0.007	0.104	-0.085	0.303	0.054	-0.379
		orf19.1371	0.408	0.046	0.2	-0.104	0.113	0.073	0.202	0.133	-0.054	0.136	-0.222	0.012	0.195	-0.013	0.162	0.045	-0.214
		orf19.1372	-0.383	0.175	-0.269	0.184	-0.393	0.122	0.349	0.215	0.308	0.41	0.134	0.023	0.461	0.152	0.091	0.523	1.472
		orf19.1372	0.187	-0.193	0.047	-0.282	0.031	-0.223	-0.012	0.011	0.203	-0.047	0.009	-0.154	0.205	0.031	-0.292	0.402	1.225
		orf19.1373	0.081	0.107	-0.009	0.152	0.054	0.074	0.374	0.273	0.394	0.167	0.238	0.085	0.338	0.212	0.366	0.681	1.106
		orf19.1373	0.265	0.06	0.055	0.207	0.069	0.073	0.285	0.335	0.521	0.235	0.249	0.116	0.442	0.208	0.379	0.809	1.047
		orf19.1374	-0.291	-0.006	-0.138	0.109	-0.221	-0.174	0.095	-0.101	0.169	0.006	0.016	-0.152	-0.023	0.087	-0.049	0.177	-0.57
		orf19.1374	-0.271	-0.018	-0.079	-0.058	-0.137	-0.278	-0.019	0.055	-0.068	-0.02	0.166	-0.178	0.006	-0.075	-0.292	0.271	-0.785
		orf19.1375	0.275	0.477	0.177	0.213	0.097	0.128	0.191	-0.2	-0.077	0.146	-0.287	0.17	-0.243	-0.115	-0.058	-0.997	0.112
		orf19.1375	0.282	0.507	0.234	0.237	0.097	0.161	0.297	-0.147	-0.236	0.212	-0.035	-0.025	-0.287	-0.067	0	-0.997	0.035
		orf19.1376	-0.065	0.326	-0.131	0.12	-0.104	0.111	0.232	0.196	0.024	0.182	0.014	0.023	0.02	0.025	0.419	0.9	0.266
		orf19.1376	0.361	0.195	0.17	0.022	0.242	-0.042	-0.044	0.004	0.05	-0.155	0.026	-0.012	0.073	-0.011	0.251	0.631	0.275
		orf19.1377	-0.059	0.349	-0.011	0.448	0.036	0.126	0.595	0.39	0.379	0.392	0.303	0.204	0.297	0.209	0.903	0.985	1.413
		orf19.1377	0.247	0.192	0.198	0.433	0.173	0.192	0.541	0.359	0.122	0.51	0.274	0.365	0.345	0.304	0.72	1.078	1.557
		orf19.1378	-0.136	0.27	-0.006	0.114	-0.234	0.048	0.034	-0.017	0.006	0.037	-0.14	0.141	-0.074	-0.046	-0.053	-0.396	-0.13
		orf19.1378	0.108	0.022	0.132	-0.063	-0.035	-0.146	-0.273	-0.044	-0.075	-0.244	-0.063	0.001	-0.093	-0.025	-0.174	-0.447	-0.447
		orf19.138	-1.036	1.032	-0.102	1.856	-0.998	0.716	2.783	2.371	2.312	3.289	3.474	0.246	2.503	0.881	6.185	6.232	NA
		orf19.138	0.346	-0.18	0.324	0.465	-0.179	-1.529	1.614	-0.056	1.106	2.739	2.618	-1.577	0.805	0.896	5.122	5.89	NA
		orf19.138	0.35	1.073	0.413	2.674	0.402	0.445	4.427	2.856	2.858	5.194	3.975	-0.152	4.033	2.956	8.2	8.586	10.079
		orf19.138	0.768	1.808	0.465	4.729	0.641	0.165	5.723	3.883	4.676	7.118	5.214	0.707	4.581	4.075	9.797	9.348	9.803
		orf19.138	0.86	1.526	0.481	2.548	NA	0.551	4.239	2.609	2.981	4.721	3.816	-0.107	3.441	3.203	7.565	7.71	NA
		orf19.1381	-0.053	-0.221	-0.108	-0.09	-0.262	0.04	0.386	-0.348	-0.107	0.266	-0.472	0.082	0.141	0.117	-0.513	-1.207	-0.375
		orf19.1381	0.207	-0.155	0.11	0.198	0.009	0.087	0.529	-0.213	0.001	0.338	-0.229	0.134	0.2	0.186	-0.451	-0.951	-0.439
		orf19.1382	0.287	0.587	0.067	0.295	0.374	0.303	0.718	0.425	0.542	0.76	0.711	0.239	0.458	0.402	1.456	1.847	2.444
		orf19.1382	0.339	0.237	0.231	0.492	0.468	0.258	0.685	0.552	0.279	0.64	0.722	0.097	0.538	0.274	1.582	2.099	2.489
		orf19.1383	-0.336	0.051	-0.021	0.014	0.018	-0.195	0.11	0.22	0.013	0.25	0.302	-0.139	0.043	-0.039	0.68	0.493	2.325
		orf19.1383	0.005	-0.096	0.165	0.131	0.035	-0.058	0.474	0.08	0.076	0.271	0.261	0.041	0.327	0.149	0.973	0.678	2.549
		orf19.1386	0.107	0.187	0.066	0.199	-0.011	0.092	0.426	0.483	0.579	0.402	0.227	0.107	0.503	0.395	0.621	0.766	0.118
		orf19.1386	0.197	0.117	0.175	0.168	0.194	0.113	0.49	0.296	0.408	0.39	0.205	-0.037	0.503	0.153	0.61	0.529	-0.264
		orf19.1387	0.152	0.208	0.013	0.214	0.122	-0.051	0.474	0.156	0.344	0.486	0.172	0.077	0.199	0.148	0.496	0.568	-0.135
		orf19.1387	0.288	0.088	0.058	0.153	0.326	0.231	0.481	0.095	0.32	0.649	0.038	0.071	0.411	0.166	0.637	0.55	0.291
		orf19.1388	-0.833	-0.125	-0.31	-0.143	-0.429	-0.17	-1.126	0.126	-0.165	-0.568	0.362	0.039	-0.434	-0.04	-0.395	-0.566	-1.115
		orf19.1388	-0.712	-0.075	-0.149	-0.089	-0.274	-0.088	-0.933	0.28	-0.09	-0.452	0.347	0.15	-0.272	-0.084	-0.379	-0.578	-1.166
		orf19.1389	-0.175	0.159	0.024	0.239	0.017	-0.032	0.141	0.188	-0.03	0.336	0.406	0.049	0.219	0.182	0.417	0.82	0.209
		orf19.1389	-0.1	-0.104	0.19	0.06	0.082	-0.053	0.074	0.113	0.018	0.086	0.22	-0.038	-0.007	0.087	0.293	0.84	-0.169
		orf19.139	-0.076	-0.075	-0.175	-0.104	-0.003	-0.012	-0.111	-0.095	-0.108	-0.113	-0.066	-0.087	-0.191	-0.102	-0.185	0.198	-0.288
		orf19.139	0.092	-0.062	0.119	0.091	0.007	-0.131	-0.108	-0.186	-0.072	-0.04	-0.145	0.07	-0.192	0.023	-0.199	0.215	-0.267
		orf19.1390	0.23	0.187	0.179	0.181	0.064	0.081	0.023	0.247	0.381	-0.241	0.247	-0.209	0.186	0.07	0.894	2.055	-0.071
		orf19.1390	0.421	0.233	0.19	0.104	0.065	0.055	0.053	-0.025	0.412	-0.185	0.106	-0.085	0.242	-0.004	0.873	2.052	0.037
		orf19.1391	-0.296	0.35	-0.144	-0.027	-0.234	0.126	0.331	0.333	0.244	0.052	0.216	-0.462	0.269	0.028	0.559	1.226	0.491
		orf19.1391	0.098	-0.05	-0.091	0.099	0.097	-0.167	0.353	0.243	0.264	0.119	0.185	-0.355	0.344	0.026	0.451	1.276	0.343
		orf19.1392	0.059	0.229	0.091	0.363	0.008	0.301	1.152	0.682	0.666	0.96	0.489	0.538	0.692	0.706	1.401	1.876	0.778
		orf19.1392	0.275	0.346	0.17	0.411	0.194	0.336	0.937	0.434	0.492	0.807	0.31	0.296	0.758	0.501	1.19	1.666	0.677
		orf19.1392	0.393	0.071	0.236	-0.03	0.357	0.176	0.204	-0.113	-0.092	0.112	-0.097	-0.149	-0.064	-0.062	0.445	0.187	0.164
		orf19.1392	0.399	0.423	0.269	0.595	0.39	0.47	1.025	0.592	0.783	0.967	0.295	0.313	0.693	0.562	1.2	1.619	0.838
		orf19.1392	0.64	-0.074	0.333	0.177	0.575	-0.107	0.564	0.244	0.449	0.522	0.378	0.231	0.377	0.405	0.974	1.57	0.217
		orf19.1393	0.171	0.06	-0.026	0.163	0.187	0.137	0.036	-0.273	-0.093	0.053	-0.223	-0.159	-0.061	-0.094	1.044	1.02	0.229
		orf19.1393	0.318	0.226	0.144	0.26	0.22	0.034	0.071	-0.032	-0.201	0.184	-0.197	0.026	-0.108	-0.066	1.052	1.02	0.323
		orf19.1394	-0.345	-0.003	-0.101	-0.194	-0.307	-0.117	-0.024	0.033	-0.297	-0.245	-0.132	-0.013	-0.047	-0.218	-0.204	-0.193	-0.277
		orf19.1394	0.134	-0.099	0.019	0.022	0.032	-0.112	-0.013	-0.067	-0.091	-0.022	-0.141	-0.038	-0.215	-0.198	-0.198	-0.121	-0.622
		orf19.1395	-0.033	-0.38	-0.098	-0.347	-0.409	-0.296	0.834	-0.118	0.261	0.744	-0.039	-0.017	0.46	0.207	0.789	1.293	0.385
		orf19.1395	0.122	-0.479	-0.092	-0.402	-0.031	-0.281	0.79	-0.084	0.218	0.642	0.038	0.063	0.383	0.276	0.772	1.368	0.479
		orf19.1396	-0.586	-0.064	-0.095	0.089	-0.339	0.004	-0.006	0.084	0.165	-0.129	0.027	0.204	0.004	0.128	0.185	0.396	0.283
		orf19.1396	-0.159	-0.374	0.183	-0.342	-0.281	-0.248	-0.21	-0.274	-0.097	-0.529	-0.259	-0.288	-0.139	-0.028	-0.105	0.22	-0.024
		orf19.1397	0.108	0.04	-0.124	-0.005	-0.102	0.123	0.076	-0.167	-0.094	0.008	-0.221	-0.168	-0.186	-0.167	0.403	-0.216	0.2
		orf19.1397	0.345	0.017	-0.12	-0.098	0.121	0.12	0.032	-0.385	-0.314	-0.188	-0.492	-0.241	-0.176	-0.241	0.416	-0.281	-0.154
		orf19.1400	-0.038	0.136	-0.03	0.408	-0.248	-0.069	0.666	0.336	0.461	0.813	0.211	0.01	0.399	0.207	0.874	1.174	1.169
		orf19.1400	0.344	-0.121	0.128	-0.146	0.143	-0.166	0.299	0.031	0.263	0.237	0.252	-0.456	0.419	0.052	0.561	0.994	1.023
		orf19.1401	2.145	1.249	0.556	0.417	0.033	0.232	2.965	2.025	2.632	2.2	1.51	0.296	2.534	1.714	NA	6.072	0.144
		orf19.1401	2.263	1.248	0.691	0.579	0.14	0.032	2.877	1.757	2.383	2.115	1.415	0.135	2.433	1.601	5.904	5.988	0.11
		orf19.1402	-0.298	0.005	-0.003	-0.01	-0.223	-0.159	-0.117	0.115	0.08	-0.107	0.098	0.012	-0.062	0.026	0.383	0.81	0.428
		orf19.1402	-0.154	0.042	0.005	0.115	-0.157	-0.147	-0.034	0.061	0.101	-0.057	0.026	-0.044	-0.041	-0.055	0.416	0.835	0.443
		orf19.1403	0.264	0.363	0.149	0.326	0.218	0.151	0.014	0.367	0.126	0.311	0.257	0.166	0.198	0.285	1.368	0.548	0.198
		orf19.1403	0.391	0.32	0.168	0.228	0.339	0.171	0.028	0.179	0.177	0.168	0.073	0.044	0.265	0.142	1.454	0.998	0.498
		orf19.1404	-0.069	0.245	-0.088	0.095	-0.031	0.118	-0.468	0.193	-0.195	-0.213	0.056	-0.026	-0.064	-0.048	0.094	-0.486	-1.025
		orf19.1404	0.079	0.202	0.023	-0.067	0.052	0.215	-0.681	-0.105	-0.163	-0.204	-0.119	-0.09	-0.208	-0.133	-0.075	-0.573	-1.162
		orf19.1405	-0.238	-0.17	0.026	0.29	-0.132	0.257	-0.441	-0.391	-0.184	-0.425	-0.316	0.165	-0.046	0.123	2.641	2.956	1.095
		orf19.1405	0.217	0.115	0.055	-0.154	0.39	-0.17	-0.771	-0.305	-0.456	-0.458	-0.209	-0.011	0.064	-0.549	2.751	2.494	0.762
		orf19.1406	-0.13	0.092	-0.121	-0.251	-0.309	-0.209	-0.413	-0.848	-0.042	-0.306	-0.321	-0.457	-0.542	-0.51	-0.29	0.597	-0.65
		orf19.1406	-0.12	-0.051	-0.091	0.054	-0.096	-0.155	-0.254	-0.262	-0.181	0.032	-0.27	-0.008	-0.29	-0.235	-0.329	1.063	-0.188
		orf19.1409	-0.029	0.106	-0.175	0.142	-0.125	0.203	0.126	0.298	-0.092	-0.038	-0.046	-0.088	0.013	0.095	-0.071	-0.549	-0.108
		orf19.1409	0.122	0.157	-0.103	-0.252	-0.066	-0.219	-0.289	0.207	-0.015	-0.398	0.011	-0.034	-0.116	-0.096	-0.203	-0.442	-0.085
		orf19.1409	0.174	-0.003	-0.011	-0.029	0.061	0.03	0.039	-0.082	0.066	-0.164	-0.069	-0.063	0.051	-0.059	-0.146	-0.471	0.075
		orf19.1409	0.245	0.175	0.044	0.054	0.223	0.058	0.012	0.108	-0.035	0.011	-0.073	-0.233	-0.038	-0.056	-0.122	-0.524	-0.112
		orf19.1409	0.416	0.134	0.252	-0.023	0.25	0.114	0.092	0.316	0.266	0.009	0.207	0.207	0.008	0.008	-0.037	-0.14	-0.097
		orf19.1409.1	-0.122	-0.131	-0.116	-0.32	-0.062	0.072	-0.623	-0.498	-0.232	-0.542	-0.371	-0.185	-0.693	-0.526	-0.595	-0.758	-1.314
		orf19.1409.1	0.132	-0.072	0.004	-0.106	0.004	-0.007	-0.506	-0.166	-0.308	-0.321	-0.312	-0.175	-0.25	-0.161	-0.351	-0.595	-0.797
		orf19.1411	-0.758	-0.065	-0.406	-0.384	-0.649	0.038	-0.561	0.073	-0.127	-0.277	-0.324	0.347	-0.54	0.095	-1.256	0.004	-0.413
		orf19.1411	-0.177	-0.193	-0.22	-0.239	-0.115	-0.218	-0.658	0.184	-0.318	-0.514	0.153	-0.026	-0.377	0.136	-2.084	-0.16	-0.387
		orf19.1412	-0.445	-0.141	-0.277	-0.042	-0.219	-0.141	-0.528	-0.204	-0.333	-0.438	-0.058	-0.037	-0.498	-0.02	0.107	0.057	-0.559
		orf19.1412	-0.223	0.052	-0.012	0.051	-0.035	-0.002	-0.283	-0.096	-0.244	-0.264	-0.073	0.149	-0.192	-0.079	0.084	0.195	-0.455
		orf19.1413	0.01	0.067	0.097	0.127	-0.138	-0.01	-0.096	-0.108	-0.216	-0.005	0.028	-0.031	-0.104	-0.027	0.3	0.26	-0.18
		orf19.1413	0.023	0.036	0.099	-0.138	0.05	0.196	-0.036	-0.059	-0.149	0.076	-0.048	-0.015	-0.06	0.055	0.293	0.327	-0.061
		orf19.1414	-0.126	0.308	0.068	0.263	-0.043	0.073	0.815	0.226	0.386	0.787	0.407	0.127	0.337	0.441	1.246	1.797	1.221
		orf19.1414	0.132	0.115	0.131	0.229	-0.03	-0.036	0.738	0.314	0.368	0.798	0.443	0.084	0.557	0.451	1.188	2.016	1.108
		orf19.1415	0.024	0.902	0.138	0.77	-0.22	0.113	1.522	0.709	0.963	1.461	0.699	0.222	0.579	0.497	0.471	0.502	0.318
		orf19.1415	0.279	0.58	0.321	0.611	0.096	0.085	1.298	0.63	0.815	1.361	0.673	0.166	0.688	0.344	0.322	0.393	0.1
		orf19.1416	0.13	-0.05	-0.015	0.115	-0.008	0.058	0.166	-0.067	-0.009	0.211	-0.253	0.161	0.095	0.111	0.322	0.351	0.004
		orf19.1416	0.244	0.264	0.116	0.287	0.211	0.102	0.288	0.079	0.138	0.409	0.011	0.218	0.089	0.063	0.329	0.392	0.297
		orf19.1417	-0.385	-0.019	-0.192	0.193	-0.327	0.026	0.081	-0.077	-0.116	0.052	-0.025	-0.069	0.17	0.022	0.038	0.008	0.275
		orf19.1417	-0.314	-0.06	0.016	0.019	-0.184	0.097	-0.018	0.053	0.038	0.027	0.506	-0.115	0.04	0.152	-0.26	-0.042	0.305
		orf19.1418	-0.267	-0.068	-0.051	0.051	-0.295	0.083	0.352	0.232	0.247	0.223	0.021	0.087	0.254	0.321	0.241	0.206	0.455
		orf19.1418	0.057	-0.235	0	-0.301	-0.017	-0.093	0.234	0.352	0.114	0.029	0.112	0.045	0.198	0.244	0.053	0.322	0.316
		orf19.1420	-0.423	0.316	-0.087	0.374	-0.168	0.222	0.472	0.518	0.344	0.275	0.421	0.202	0.482	0.319	0.593	0.541	0.932
		orf19.1420	-0.03	0.136	-0.028	0.302	0.127	-0.243	0.52	0.357	0.466	0.257	0.242	0.104	0.135	0.262	0.458	0.385	0.855
		orf19.1421	-0.29	-0.071	-0.401	0.006	-0.486	-0.192	0.047	0.123	0.252	0.193	0.33	0.117	0.231	0.171	-1.012	-1.122	0.423
		orf19.1421	-0.143	-0.288	-0.096	-0.182	-0.057	-0.383	0.071	0.016	0.29	0.259	0.034	0.053	0.409	-0.046	-1.035	-1.443	0.47
		orf19.1422	-0.015	0.126	-0.018	0.171	-0.113	0.029	-0.011	0.096	0.091	-0.133	0.094	0.033	-0.135	0.164	0.418	0.186	-0.618
		orf19.1422	0.171	0.115	0.021	0.032	0.025	0.088	-0.031	0.102	0.079	-0.028	0.01	0.069	0.105	-0.061	0.515	0.57	-0.718
		orf19.1424	-0.074	0.258	-0.124	0.443	0.102	0.26	0.824	0.104	0.327	0.594	0.197	0.105	0.31	0.343	0.4	-0.365	0.392
		orf19.1424	0.18	0.042	-0.019	-0.045	0.194	0.082	0.362	-0.036	0.048	0.149	0.246	-0.013	0.279	0.368	0.109	-0.39	0.542
		orf19.1426	-0.125	0.162	-0.041	0.017	-0.295	-0.036	-0.776	-0.007	-0.295	-0.37	0.118	-0.151	-0.145	-0.069	-0.636	0.708	0.406
		orf19.1426	0.211	0.268	0.219	0.232	0.022	0.105	-0.438	-0.207	-0.127	-0.223	0.102	-0.164	-0.015	0.037	-0.219	0.836	0.291
		orf19.1427	-0.267	-0.127	-0.277	-0.146	-0.23	-0.007	-0.276	-0.316	-0.174	-0.341	-0.438	-0.029	-0.239	-0.391	0.276	0.1	-1.998
		orf19.1427	0.072	-0.38	-0.081	-0.38	-0.017	-0.235	-0.449	-0.509	-0.284	-0.436	-0.453	-0.095	-0.367	-0.43	0.068	0.154	-1.944
		orf19.1428	-0.153	0.182	-0.273	-0.138	-0.092	0.318	-0.518	-0.232	-0.6	-0.524	-0.184	-0.076	-0.376	-0.123	0.038	0.26	-1.196
		orf19.1428	-0.055	-0.178	-0.081	-0.129	-0.048	-0.062	-0.513	-0.549	-0.601	-0.738	-0.525	-0.199	-0.72	-0.374	-0.086	0.16	-1.39
		orf19.1428	-0.032	0.136	0.066	0.141	0.08	0.246	-0.529	-0.512	0.297	-0.577	-0.475	0.04	-0.544	-0.218	0.005	0.073	-1.441
		orf19.1428	0.134	-0.137	0.082	-0.324	0.153	0.122	-0.598	-0.9	-0.636	-0.743	-0.621	-0.231	-0.482	-0.194	-0.111	0.084	-1.469
		orf19.1428	0.177	-0.084	0.097	-0.148	0.17	0.24	-0.443	0.002	-0.593	-0.468	-0.301	-0.156	-0.416	0.026	-0.151	0.317	-1.27
		orf19.1429	-0.334	0.112	-0.367	0.083	-0.118	-0.035	-0.112	0.3	-0.159	-0.281	-0.168	-0.072	-0.212	-0.167	0.123	0.229	0.086
		orf19.1429	0.156	0.117	0.049	0.235	0.14	0.052	0.116	0.134	-0.072	0.131	0.075	0.492	0.022	0.051	0.238	0.343	0.356
		orf19.1430	-0.204	0.372	-0.471	0.091	-0.479	-0.329	-0.074	-0.246	-0.011	-0.341	0.176	-0.023	-0.137	-0.211	-0.046	0.562	3.585
		orf19.1430	0.157	-0.433	-0.213	-0.082	0.138	-0.031	0.028	0.063	0.188	0.152	0.398	0.001	0.218	0.291	-0.081	0.677	3.735
		orf19.1433	-0.087	0.35	-0.188	0.122	-0.266	-0.255	0.686	0.342	0.337	0.407	0.296	-0.173	0.189	0.114	1.046	1.277	-0.312
		orf19.1433	0.112	0.037	-0.083	0.439	-0.029	-0.275	0.564	0.125	0.207	0.458	0.122	-0.141	0.233	0.19	0.972	1.333	-0.059
		orf19.1434	-0.392	0.273	-0.148	-0.061	-0.234	0.05	-1.151	-0.612	-0.613	-1.196	-0.176	-0.089	-0.638	-0.348	-1.107	-0.072	-1.503
		orf19.1434	-0.368	-0.401	0.094	-0.327	-0.142	0.1	-1.265	-0.696	-0.487	-0.941	-0.649	-0.265	-0.853	-0.332	-1.401	-0.236	-1.694
		orf19.1435	NA	NA	NA	NA	NA	NA	NA	NA	NA	NA	NA	NA	NA	NA	NA	NA	NA
		orf19.1435	NA	NA	NA	NA	NA	NA	NA	NA	NA	NA	NA	NA	NA	NA	NA	NA	NA
		orf19.1438	0.096	0.338	-0.047	-0.069	-0.341	0.184	0.206	0.232	-0.068	0.134	0.395	0.112	0.564	-0.104	0.996	0.485	0.544
		orf19.1438	0.325	-0.324	0.005	-0.227	0.162	0.267	0.098	1.411	0.743	0.231	-0.18	-0.362	-0.361	-0.061	-0.322	0.128	0.715
		orf19.1439	-0.033	0.241	-0.113	0.071	-0.082	0.103	0.083	-0.051	0.204	0.109	-0.223	-0.154	-0.195	-0.115	0.349	0.372	0.573
		orf19.1439	0.063	0.072	-0.013	0.08	0.031	0.189	0.002	-0.124	-0.147	0.012	-0.13	-0.24	-0.054	-0.106	0.182	0.347	0.56
		orf19.144	-0.54	-0.379	-0.35	-0.471	-0.517	-0.281	-0.514	-0.04	-0.407	-0.468	-0.323	-0.125	-0.199	0.002	-0.575	-0.706	-0.605
		orf19.144	-0.462	-0.354	-0.328	-0.347	-0.463	-0.369	-0.59	-0.039	-0.117	-0.647	0.053	-0.236	-0.44	-0.152	-0.601	-0.637	-0.873
		orf19.1440	-0.197	-0.091	-0.182	-0.372	-0.311	-0.169	-0.312	-0.453	-0.29	-0.29	-0.356	-0.161	-0.203	-0.085	-0.168	-0.373	-0.006
		orf19.1440	0.073	0.107	-0.181	-0.142	-0.18	-0.111	-0.43	-0.2	-0.141	-0.123	-0.348	-0.039	-0.314	-0.207	0.132	-0.268	0.132
		orf19.1441	-0.573	-0.157	-0.207	-0.502	-0.591	-0.294	-0.862	-0.173	-0.307	-0.716	-0.216	-0.386	-0.476	-0.39	-0.656	-0.927	-0.919
		orf19.1441	-0.569	0.187	-0.162	-0.141	-0.377	-0.1	-0.458	0.09	-0.211	-0.248	-0.016	-0.27	-0.3	-0.237	-0.187	-0.677	-0.61
		orf19.1441	-0.531	-0.101	-0.138	-0.15	-0.298	-0.165	-0.734	0.125	-0.076	-0.468	0.229	-0.099	-0.26	-0.021	-0.366	-0.717	-0.565
		orf19.1441	-0.142	-0.213	-0.121	-0.492	-0.063	-0.122	-1.02	-0.395	-0.251	-0.638	-0.387	-0.33	-0.566	-0.411	-0.719	-1.005	-0.538
		orf19.1441	0.189	-0.531	0.046	-0.698	0.071	-0.314	-0.971	-0.573	-0.534	-0.75	-0.368	-0.314	-0.752	-0.313	-0.774	-1.138	-1.152
		orf19.1442	-0.313	-0.528	-0.249	-0.299	-0.22	-0.22	-0.187	-0.154	-0.25	-0.129	0.136	-0.224	-0.059	-0.028	-1.812	-0.798	-0.278
		orf19.1442	-0.065	-0.569	-0.207	-0.268	-0.079	-0.346	-0.273	-0.062	-0.121	-0.251	0.037	-0.111	-0.071	-0.033	-2.111	-0.824	-0.274
		orf19.1442	-0.009	-0.424	-0.135	-0.198	-0.067	-0.236	-0.14	-0.306	-0.002	-0.136	-0.126	-0.193	-0.066	0.051	-2.061	-1.085	-0.455
		orf19.1442	0.054	-0.856	-0.112	-0.388	0.012	-0.461	-0.468	-0.318	-0.298	-0.394	-0.238	-0.359	-0.208	-0.17	-2.358	-1.146	-0.68
		orf19.1442	0.172	-0.709	-0.045	-0.532	0.234	-0.186	-0.266	-0.467	-0.224	-0.353	-0.141	-0.475	-0.144	-0.267	-2.121	-0.695	-0.354
		orf19.1444	-0.36	-0.181	-0.2	-0.005	-0.359	-0.039	0.155	-0.244	-0.124	0.009	-0.275	0.016	-0.023	-0.024	-0.466	-0.659	0.464
		orf19.1444	-0.062	-0.482	-0.101	-0.327	-0.154	-0.179	-0.118	-0.436	-0.345	-0.287	-0.432	-0.26	-0.223	-0.162	-0.854	-0.807	0.17
		orf19.1445	0.165	0.252	0.115	-0.075	-0.055	0.206	-2.872	-1.431	-1.542	-2.501	-1.439	-0.82	-1.67	-0.73	-1.96	0.082	-2.127
		orf19.1445	0.428	0.048	0.155	-0.081	0.149	-0.028	-2.907	0.223	-2.384	-3.393	0.2	-0.908	-2.021	-1.031	-3.046	-0.248	-3.748
		orf19.1446	0.164	-0.342	0.065	-0.464	0.146	-0.009	-1.803	-1.003	-1.186	-1.424	-1.093	-0.645	-1.1	-0.508	-0.632	-0.345	-0.804
		orf19.1446	0.341	-0.222	0.132	-0.372	0.155	-0.017	-1.876	-1.15	-0.976	-1.852	-1.114	-0.483	-1.247	-0.442	-0.693	-0.22	-0.675
		orf19.1447	0.04	0.141	0.116	0.103	0.002	0.124	-1.047	-0.159	-0.617	-0.705	0.514	-0.452	-0.577	-0.05	1.111	3.074	3.125
		orf19.1447	0.1	0.178	0.125	0.026	0.158	0.172	-1.185	-0.465	-0.538	-0.689	0.455	-0.267	-0.639	-0.155	1.089	3.052	3.178
		orf19.1448	-0.094	0.039	-0.118	-0.06	-0.037	0.055	-0.368	-0.229	-0.361	-0.29	-0.107	-0.113	-0.143	-0.164	1.214	1.89	0.339
		orf19.1448	0.023	0.125	0.073	0.213	0.164	0.047	-0.206	0.009	-0.13	-0.102	0.056	0.024	0.002	-0.022	1.454	1.912	0.283
		orf19.1448.1	-0.345	-0.053	-0.175	0.231	-0.234	0.043	-0.073	0.087	-0.098	-0.051	0.048	-0.151	0.136	0.032	1.26	1.902	0.796
		orf19.1448.1	-0.205	-0.238	-0.107	-0.169	-0.058	-0.084	-0.287	0.33	-0.013	-0.06	0.208	0.004	0.175	0.197	1.061	1.409	0.884
		orf19.1449	0.169	0.437	-0.01	0.32	0.148	0.297	0.086	-0.136	-0.123	0.094	-0.248	0.194	-0.049	0.022	0.931	-0.411	-0.644
		orf19.1449	0.265	0.447	0.299	0.105	0.241	0.172	0.026	-0.121	-0.255	0.064	-0.258	0.071	0.055	0.008	0.645	-0.912	-0.609
		orf19.145	-0.964	-0.588	-0.491	-0.462	-0.705	-0.415	-0.94	-0.582	-0.539	-0.621	-0.371	-0.249	-0.756	-0.265	-0.747	-0.877	-0.426
		orf19.145	-0.255	-0.403	-0.144	-0.334	-0.269	-0.327	-0.642	-0.268	-0.061	-0.424	-0.313	-0.106	-0.412	-0.288	-0.455	-0.889	-0.43
		orf19.1450	-0.064	0.422	-0.1	0.177	-1.115	0.625	0.181	0.328	-0.078	0.607	0.354	0.237	0.404	0.462	1.265	0.256	0.204
		orf19.1450	0.093	0.63	-0.065	0.316	-1.085	0.163	0.358	0.606	NA	0.107	NA	-2.74	-1.067	-0.305	-0.414	4.873	NA
		orf19.1450	0.202	-2.294	0.125	NA	0.58	NA	NA	NA	NA	NA	NA	NA	NA	NA	NA	NA	NA
		orf19.1450	NA	NA	0.154	-0.084	0.669	0.634	-0.106	-1.483	-0.189	NA	-1.629	-1.066	NA	0.577	NA	0.196	-0.771
		orf19.1450	NA	NA	0.719	0.065	NA	-0.071	-0.331	0.549	-1.933	-0.443	0.225	-1.027	-0.748	-1.295	-0.072	0.474	-0.309
		orf19.1451	-0.295	0.136	-0.1	0.191	-0.132	-0.052	0.247	0.294	0.026	0.401	0.257	0.079	0.175	0.247	0.247	0.3	0.509
		orf19.1451	0.126	-0.067	-0.05	-0.193	0.008	-0.131	-0.105	0.142	-0.056	-0.077	0.011	-0.016	0.012	-0.002	0.072	0.287	0.32
		orf19.1453	-0.024	-0.139	-0.035	-0.136	0.007	-0.062	-0.047	-0.038	0.125	-0.051	0.032	0.099	0.134	0.111	-0.305	-0.323	0.216
		orf19.1453	0.29	0.132	0.216	0.093	0.329	0.168	0.227	0.066	0.049	0.174	0.096	0.175	0.254	0.159	-0.15	-0.166	0.478
		orf19.1456	1.365	NA	-0.196	0.216	-0.163	-0.165	-0.131	0.343	0.152	0.221	-1.395	NA	NA	NA	NA	NA	NA
		orf19.1456	NA	NA	0.498	0.526	0.814	0.883	-1.088	0.06	0.435	1.004	0.189	-0.808	1.053	0.004	0.895	-0.002	0.796
		orf19.1457	-0.126	0.281	0.084	0.213	-0.038	0.115	0.32	0.362	0.11	0.223	0.105	0.16	0.073	0.159	0.021	-0.235	-0.002
		orf19.1457	0.307	0.056	0.089	0.109	0.324	0.032	0.074	0.399	0.256	0.005	0.243	0.188	0.184	0.043	-0.133	-0.283	0.052
		orf19.1458	-0.447	-0.317	-0.172	-0.119	-0.375	-0.136	-0.183	0.365	-0.257	-0.108	-0.077	0.218	-0.28	0.038	0.15	-0.059	-0.008
		orf19.1458	-0.194	-0.193	-0.027	0.027	-0.191	0.039	-0.109	0.273	0.006	-0.045	0.308	0.22	0.036	-0.02	0.314	0.173	-0.029
		orf19.1459	0.006	0.109	0.121	0.354	0.234	0.227	0.593	0.045	-0.036	0.404	0.244	0.117	0.34	0.156	0.623	0.624	0.422
		orf19.1459	0.061	0.191	0.261	0.38	0.347	0.033	0.398	0.21	0.234	0.296	0.537	0.198	0.221	0.244	0.473	0.383	0.257
		orf19.1460	-0.271	-0.61	-0.302	-0.555	-0.38	-0.52	-0.26	-0.081	-0.285	-0.281	-0.163	-0.005	-0.3	-0.18	-0.078	0.118	-0.308
		orf19.1460	-0.231	-0.338	-0.035	-0.194	-0.168	-0.097	-0.089	-0.167	-0.179	0.116	-0.012	-0.086	0.056	0.015	0.258	0.272	-0.144
		orf19.1461	-0.014	-0.141	-0.02	-0.012	0.169	-0.063	0.527	0.418	0.179	0.66	0.465	0.203	0.271	0.32	1.32	1.761	1.092
		orf19.1461	0.1	-0.424	-0.001	-0.02	0.303	0.193	0.736	-0.07	-0.07	0.846	0.362	-0.128	0.569	0.294	1.169	1.898	0.715
		orf19.1462	-0.27	-0.248	-0.236	-0.159	-0.153	-0.103	0.187	0.117	0.007	0.246	0.059	0.199	0.137	0.096	0.18	0.503	0.297
		orf19.1462	-0.248	-0.284	-0.027	-0.027	-0.074	-0.097	0.356	-0.208	0.139	0.338	0.03	0.076	-0.032	0.062	0.126	0.396	0.315
		orf19.1464	-0.073	-0.206	-0.127	-0.156	0.031	-0.22	0.131	-0.179	0.136	0.024	-0.287	-0.183	0.011	0.018	0.391	0.233	1.158
		orf19.1464	0.1	0.141	-0.004	0.1	0.165	0.157	0.267	0.083	0.204	0.238	0.097	-0.118	0.149	0.082	0.506	0.324	0.944
		orf19.1465	-0.472	-0.074	0.19	0.047	-0.048	0.026	0.081	0.294	0.107	0.25	0.076	0.198	0.411	0.138	0.08	-0.137	0.621
		orf19.1465	0.594	0.424	0.266	0.361	0.67	0.208	0.614	0.404	0.502	0.653	0.527	-0.043	0.469	0.242	0.331	0.122	0.599
		orf19.1466	-0.251	-0.032	-0.061	-0.089	-0.148	-0.018	-0.336	-0.184	-0.253	-0.203	-0.119	-0.068	-0.123	-0.034	-0.213	-0.725	-0.799
		orf19.1466	-0.12	-0.044	-0.012	-0.009	-0.041	0.072	-0.218	0.103	0.017	-0.14	0.061	0.202	-0.121	0.007	-0.262	-0.296	-0.966
		orf19.1467	-0.356	-0.088	-0.24	-0.219	-0.328	-0.31	-0.283	-0.166	0.123	-0.252	-0.138	-0.161	-0.211	-0.195	0.464	0.496	-0.407
		orf19.1467	-0.298	-0.204	-0.227	-0.145	-0.311	-0.293	-0.243	-0.04	0.012	-0.204	-0.331	-0.059	-0.129	-0.144	0.545	0.579	-0.378
		orf19.1467	-0.115	0	-0.138	0.11	-0.249	-0.16	-0.01	-0.065	0.054	-0.033	-0.294	-0.081	-0.013	-0.072	0.903	0.618	-0.057
		orf19.1467	0.048	-0.041	0.061	0.035	-0.06	-0.192	-0.177	-0.101	0.065	-0.026	-0.26	-0.034	0.002	-0.067	0.656	0.755	-0.217
		orf19.1467	0.164	0.158	0.085	0.179	0.105	-0.08	0.005	-0.07	0.011	0.169	-0.02	0.029	0.073	0.022	0.898	0.762	-0.178
		orf19.1468	-0.078	-0.067	0.142	0.093	-0.056	-0.108	0.089	0.065	0.135	0.273	0.043	0.038	0.145	0.104	-0.251	-0.137	0.477
		orf19.1468	-0.021	-0.187	0.169	0.023	0.074	0.115	0.273	0.023	0.048	0.133	0.179	0.067	0.142	0.131	-0.262	0.058	0.591
		orf19.147	-0.796	-0.577	-0.44	-0.568	-0.628	NA	-0.417	-0.676	-0.232	-0.438	-0.514	-0.4	-0.311	-0.416	-0.548	-0.388	-0.453
		orf19.147	0.187	-0.172	0.125	-0.067	0.153	-0.027	0.372	-0.042	0.028	0.035	-0.063	-0.099	-0.199	-0.083	-0.442	-0.923	0.362
		orf19.1470	-0.287	NA	NA	NA	-0.142	NA	NA	NA	NA	NA	NA	NA	NA	NA	0.167	NA	NA
		orf19.1470	NA	NA	NA	0.1	NA	NA	NA	NA	NA	NA	NA	NA	NA	NA	-0.409	-0.062	NA
		orf19.1470	NA	NA	NA	NA	NA	NA	NA	NA	NA	NA	NA	NA	NA	NA	-0.221	-0.002	NA
		orf19.1470	NA	NA	NA	NA	NA	NA	NA	NA	NA	NA	NA	NA	NA	NA	NA	0.115	NA
		orf19.1470	NA	-0.153	NA	NA	NA	-0.183	-0.307	NA	NA	NA	NA	NA	NA	NA	-0.371	-0.072	NA
		orf19.1471	-0.204	0.271	-0.163	-0.072	-0.359	0.083	0.044	0.061	-0.065	0.014	-0.019	-0.016	0.013	-0.011	0.866	0.582	-0.372
		orf19.1471	0.284	-0.05	0.016	-0.174	0.091	-0.263	-0.286	-0.289	-0.099	-0.273	-0.306	-0.168	-0.205	-0.223	0.379	0.387	-0.615
		orf19.1473	-0.039	0.629	0.176	0.542	-0.248	0.194	-0.259	0.417	0.358	0.348	0.271	-0.042	0.526	0.102	2.987	2.737	2.926
		orf19.1473	0.171	0.301	0.211	0.201	-0.08	-0.103	-0.429	0.477	0.2	0.046	0.449	-0.162	0.392	0.041	2.732	2.507	2.85
		orf19.1474	-0.081	-0.012	-0.076	0.144	-0.229	-0.058	0.318	0.037	0.165	0.342	-0.137	0.009	0.241	0.146	0.414	0.552	1.221
		orf19.1474	-0.068	-0.031	0.018	0.123	-0.175	-0.161	0.259	-0.067	0.164	0.339	-0.017	-0.068	0.08	0.146	0.301	0.428	1.159
		orf19.1476	-1.945	0.115	-0.594	0.037	-0.576	-0.286	0.653	0.783	-0.091	0.607	-0.005	-0.523	0.067	0.316	-0.059	0.219	0.66
		orf19.1476	0.261	0.003	-0.08	0.187	0.226	0.43	0.22	0.387	-0.183	0.181	-0.55	-0.012	0.514	-0.154	0.109	0.73	0.316
		orf19.1477	-0.021	-0.065	-0.08	0.112	-0.108	0.065	0.429	0.139	0.074	0.464	-0.109	0.157	0.077	0.123	0.758	0.329	0.519
		orf19.1477	0.262	-0.228	0.136	-0.16	0.236	-0.106	0.047	0.011	0.21	-0.008	-0.17	0.108	0.107	-0.031	0.43	0.207	0.379
		orf19.1478	-0.081	-0.015	0.018	-0.062	-0.137	0.226	0.235	0.134	0.376	0.251	0.175	-0.057	0.378	0.181	0.223	0.989	1.267
		orf19.1478	-0.066	-0.021	0.046	-0.094	-0.136	-0.007	0.183	0.009	0.181	0.195	0.313	-0.134	0.261	0.087	0.185	1.014	1.111
		orf19.1479	-0.495	-0.097	0.101	0.018	-0.345	-0.06	0.233	-0.138	0.046	0.057	-0.233	0.02	0.206	0.032	0.378	-0.065	-0.653
		orf19.1479	0.233	0.026	0.115	-0.43	0.132	-0.004	-0.156	-0.352	-0.259	-0.114	-0.302	-0.072	-0.468	-0.42	-0.318	-0.692	-1.296
		orf19.1480	0.052	-0.02	-0.087	0.008	-0.164	-0.163	-0.092	-0.035	-0.063	-0.082	-0.252	0.229	-0.007	0.004	0.968	0.127	0.249
		orf19.1480	0.294	0.208	0.169	0.298	0.311	0.102	0.146	0.075	0.039	0.208	-0.087	0.187	0.067	0.06	1.17	0.301	0.332
		orf19.1481	0.226	-0.109	-0.097	-0.057	-0.059	-0.035	0.356	-0.484	-0.136	0.148	-0.412	-0.081	-0.095	-0.114	-0.387	-1.004	0.153
		orf19.1481	0.255	0.085	-0.046	-0.242	0.053	-0.041	0.295	-0.413	-0.131	-0.081	-0.161	-0.123	-0.173	-0.218	-0.585	-0.861	-0.031
		orf19.1482	-0.529	-0.538	-0.068	-0.601	-0.469	-0.141	-0.708	-0.59	-0.563	-0.79	-0.581	-0.024	-0.304	-0.404	-0.483	0.015	-0.849
		orf19.1482	-0.482	-0.808	0.094	-0.806	-0.295	-0.196	-0.768	-0.764	-0.378	-0.942	-0.526	-0.289	-0.671	-0.419	-0.843	-0.568	-1.089
		orf19.1483	-0.426	0.154	-0.163	0.201	-0.264	0.069	-0.08	0.26	-0.116	0.024	0.182	0.191	0.013	0.204	0.52	0.432	-0.16
		orf19.1483	-0.284	-0.089	-0.08	0.129	-0.024	-0.146	-0.224	0.01	-0.081	-0.097	0.086	0.083	-0.032	0.072	0.36	0.338	-0.164
		orf19.1484	-0.12	0.047	-0.023	-0.096	0.01	-0.004	-0.442	-0.438	0.267	-0.369	-0.128	-0.022	-0.329	-0.216	0.191	0.158	-0.19
		orf19.1484	0.085	-0.544	0.241	0.518	0.167	-0.017	-0.841	-0.584	0.424	-0.816	-0.768	-0.205	-0.835	-0.484	-0.631	-0.416	-1.346
		orf19.1485	-0.45	-0.376	-0.077	-0.49	-0.205	-0.109	-0.85	-0.979	-0.697	-0.64	-0.787	-0.644	-0.976	-0.681	-0.433	-1.026	-1.659
		orf19.1485	-0.341	-0.014	-0.031	-0.017	-0.16	-0.255	-0.809	-0.172	-0.325	-0.338	-0.41	-0.13	-0.317	-0.233	-0.395	-0.575	-0.379
		orf19.1486	-0.079	0.032	0.074	-0.18	-0.166	-0.203	-0.555	-0.079	-0.304	-0.263	0.035	-0.336	-0.408	-0.377	1.515	0.488	2.028
		orf19.1486	-0.049	0.043	0.116	-0.178	-0.115	-0.452	-0.552	-0.248	-0.446	-0.424	-0.015	-0.344	-0.407	-0.5	1.325	0.294	1.296
		orf19.1488	-0.146	-0.18	-0.187	-0.071	-0.254	-0.063	-0.364	-0.286	-0.395	-0.331	-0.254	-0.041	-0.32	-0.262	-0.113	-0.637	-0.326
		orf19.1488	-0.127	0.164	0.004	0.162	-0.175	0.123	-0.2	-0.011	-0.172	-0.146	-0.127	0.223	-0.256	-0.243	0.045	-0.277	-0.414
		orf19.149	0.076	-0.167	0.064	-0.637	0.16	-0.021	-0.406	0.605	0.418	-0.615	0.884	0.064	0.763	0.646	0.246	0.969	0.68
		orf19.149	0.402	-0.438	0.162	-0.165	0.733	0.24	0.025	0.164	0.265	-0.108	0.174	0.054	0.607	0.176	-0.113	0.24	0.109
		orf19.1490	0.172	0.662	0.202	0.377	-0.21	0.095	0.079	0.017	0.029	-0.02	0.027	-0.252	-0.155	0.039	0.935	1.55	0.043
		orf19.1490	0.587	0.284	0.364	0.049	0.171	-0.1	-0.247	-0.496	-0.046	-0.309	-0.101	-0.227	-0.246	0.014	0.643	1.339	-0.178
		orf19.1491	-0.308	0.062	-0.248	-0.12	-0.261	-0.277	-0.272	0.062	-0.283	-0.314	-0.142	-0.131	-0.336	-0.183	-0.349	-0.861	-0.354
		orf19.1491	-0.221	-0.108	-0.013	-0.201	-0.237	-0.458	-0.433	-0.009	-0.116	-0.241	-0.335	-0.168	-0.33	-0.285	-0.288	-0.82	-0.11
		orf19.1492	-0.468	0.019	-0.312	-0.254	-0.601	-0.092	-0.315	0.351	-0.033	-0.365	-0.02	0.002	-0.164	-0.207	-0.021	-0.444	-0.265
		orf19.1492	-0.266	-0.242	-0.156	-0.197	-0.144	-0.347	-0.444	-0.304	0.004	-0.305	-0.112	-0.215	-0.134	-0.214	-0.007	-0.62	-0.315
		orf19.1493	0.005	-0.156	0.035	-0.053	0.13	-0.112	-0.265	-0.264	-0.279	-0.221	-0.128	-0.068	-0.133	0.021	-0.924	-0.465	-0.578
		orf19.1493	0.026	-0.029	0.108	0.263	0.307	0.063	-0.14	-0.392	-0.214	-0.095	0.007	-0.145	-0.17	-0.121	-0.995	-0.556	-0.651
		orf19.1494	0.359	0.177	0.021	0.076	0.051	0.101	0.101	0.118	0.094	-0.028	0.169	-0.016	0.097	0	-0.094	0.173	0.063
		orf19.1494	0.414	0.13	0.104	-0.081	0.06	-0.059	0.023	0.048	0.097	0.031	0.065	-0.071	0.036	-0.025	-0.021	0.091	-0.023
		orf19.1495	-0.121	0.207	-0.081	0.013	-0.072	-0.054	-0.133	0.322	-0.21	-0.107	0.193	-0.103	-0.116	-0.031	-0.076	-0.615	0.011
		orf19.1495	-0.025	-0.112	-0.03	0.03	0.022	0.059	-0.163	-0.084	-0.294	-0.084	-0.06	-0.152	-0.053	-0.109	-0.097	-0.533	0.067
		orf19.1495	-0.02	-0.029	0.072	0.182	0.101	-0.163	-0.297	0.025	-0.191	-0.121	-0.057	-0.114	-0.078	-0.138	-0.02	-0.45	0.042
		orf19.1495	0.13	0.037	0.081	0.034	0.123	0.044	-0.202	0.338	-0.097	-0.188	0.246	0.186	-0.033	-0.038	-0.159	-0.419	-0.288
		orf19.1495	0.173	0.026	0.109	0.11	0.162	-0.004	-0.215	0.325	-0.368	-0.035	0.074	-0.078	0.078	0.038	0.021	-0.975	-0.31
		orf19.1496	-0.142	0.255	-0.143	-0.069	-0.364	0.018	0.114	0.111	0.196	0.14	0.196	0.087	-0.015	-0.09	-0.005	-0.465	0.368
		orf19.1496	0.102	0.123	0.144	-0.025	0.064	-0.037	0.128	-0.071	0.083	0.136	-0.008	-0.058	0.125	-0.11	-0.13	-0.444	0.59
		orf19.1497	-0.314	0.321	-0.03	-0.178	-0.203	0.197	0.173	0.07	-0.073	0.058	0.171	0.104	-0.013	-0.046	-0.101	-0.52	0.271
		orf19.1497	-0.177	-0.491	0.279	-0.529	-0.164	-0.293	-0.145	-0.13	-0.27	-0.152	0.098	-0.382	-0.233	-0.165	-0.549	-0.552	0.129
		orf19.1499	-0.195	-0.026	-0.079	-0.217	-0.309	-0.043	0.013	-0.287	-0.051	-0.14	-0.075	0.122	-0.209	-0.14	-0.432	-0.64	0.018
		orf19.1499	-0.059	-0.407	0.126	-0.434	-0.168	-0.175	-0.2	-0.276	-0.187	-0.3	-0.267	-0.132	-0.576	-0.331	-0.585	-0.075	-0.569
		orf19.150	-0.163	-0.009	-0.063	-0.049	-0.062	0.005	-0.542	-0.168	-0.147	-0.298	-0.292	-0.042	-0.217	-0.013	0.026	-0.399	-0.028
		orf19.150	-0.021	-0.04	0.016	-0.015	0.053	-0.102	-0.67	-0.205	-0.23	-0.317	-0.373	-0.031	-0.316	-0.107	-0.065	-0.546	-0.324
		orf19.1500	-0.114	-0.216	-0.179	-0.718	-0.353	-0.194	-0.146	-0.424	-0.285	-0.331	-0.496	-0.553	-0.426	-0.388	-0.23	-0.434	0.013
		orf19.1500	0.089	0.012	0.116	-0.094	-0.204	-0.069	-0.029	-0.263	0.057	-0.131	0.015	-0.299	-0.202	-0.06	-0.32	-0.187	0.157
		orf19.1502	-0.449	0.005	-0.03	-0.029	-0.091	-0.098	0.341	-0.137	-0.314	-0.097	0.018	0.012	-0.33	-0.14	0.153	-0.082	0.103
		orf19.1502	-0.06	-0.299	0.026	-0.366	-0.026	-0.259	-0.165	-0.279	0.019	-0.573	0.135	-0.183	-0.51	-0.309	-0.558	0.211	-0.245
		orf19.1504	-0.23	-0.163	-0.046	0.166	0.006	0.015	0.485	0.222	0.194	0.456	0.245	0.361	0.255	0.276	0.192	0.282	0.049
		orf19.1504	-0.105	-0.472	-0.009	-0.044	0.215	-0.086	0.251	-0.098	0.089	0.206	0.015	0.274	0.19	0.238	0.011	0.27	0.031
		orf19.1505	-0.716	-0.56	-0.289	-0.458	-0.563	0.017	-0.298	-0.823	-0.541	-0.589	-0.546	-0.439	-0.678	-0.505	-0.452	-1.092	0.687
		orf19.1505	-0.245	-0.759	0.057	-0.565	0.072	-0.491	-0.748	-0.291	-0.567	-0.906	-0.081	-0.254	-0.416	-0.329	-1.071	-0.735	1.217
		orf19.1506	0.092	NA	-0.033	0.421	0.574	0.757	NA	NA	0.245	NA	-0.533	NA	NA	0.29	NA	-0.616	NA
		orf19.1506	NA	-0.108	0.408	-0.065	0.883	-0.034	0.706	-0.983	0.192	0.142	-1.105	-0.063	-0.8	-2.06	-0.071	0.564	1.798
		orf19.1507	-0.126	-1.469	-0.225	-1.227	-0.091	-0.62	-0.726	-1.269	-0.497	-0.191	-0.166	-0.713	-1.308	-0.535	-1.458	-2.103	-2.406
		orf19.1507	0.199	-0.754	0.033	-0.662	0.012	-0.318	-0.441	-0.749	-0.843	-0.471	-0.388	-0.479	-0.687	-0.551	-0.934	-1.388	-2.008
		orf19.1508	0.314	-0.164	0.132	-0.087	0.449	0.084	-0.053	-0.059	-0.478	-0.325	-0.345	0.093	-0.426	-0.001	0.045	-1.279	-1.095
		orf19.1508	0.716	-0.363	0.268	-0.088	0.699	-0.11	-0.28	-0.562	-0.387	-0.404	-0.27	-0.08	-0.608	-0.104	0.46	-1.071	-0.39
		orf19.1509	-0.706	-0.2	-0.366	-0.263	-0.674	-0.11	-0.773	-0.37	-0.351	-0.563	-0.337	-0.102	-0.475	-0.127	-0.701	-0.728	-1.208
		orf19.1509	-0.218	-0.627	-0.037	-0.639	-0.092	-0.223	-1.018	-0.559	-0.648	-0.904	-0.551	-0.181	-0.549	-0.231	-1.083	-0.906	-1.444
		orf19.151	0.123	0.243	0.033	0.208	-0.141	0.009	0.084	0.223	0.386	0.027	0.28	-0.005	0.103	-0.058	0.133	-0.33	-0.529
		orf19.151	0.147	-0.117	0.141	0.06	0.128	0.046	-0.028	-0.113	-0.034	-0.083	-0.002	0.048	-0.048	0.025	0.041	-0.362	-0.125
		orf19.1510	0.019	0.039	-0.124	0.04	0.034	0.115	-0.323	-0.269	-0.276	-0.519	-0.247	-0.114	-0.549	-0.184	-0.111	1.101	0.218
		orf19.1510	0.033	-0.071	-0.014	0.084	0.089	-0.027	-0.377	-0.471	-0.514	-0.607	-0.298	-0.185	-0.486	-0.165	0.017	1.12	0.373
		orf19.1513	-0.382	-0.294	-0.191	-0.169	-0.16	-0.082	-0.111	-0.302	-0.098	-0.155	-0.218	-0.194	-0.015	0.009	-0.223	0.101	-0.098
		orf19.1513	0.026	-0.094	0.076	0.014	0.028	0.127	0.033	-0.191	-0.083	0.115	-0.075	-0.153	0.059	-0.056	-0.116	0.08	0.21
		orf19.1514	0.082	0.176	0.033	0.162	0.02	0.126	0.357	0.161	0.217	0.174	0.022	0.092	0.274	0.146	0.406	0.696	0.698
		orf19.1514	0.15	0	0.099	-0.034	0.116	-0.057	0.283	0.295	0.181	0.141	0.148	-0.1	0.203	0.088	0.253	0.815	0.447
		orf19.1515	0.368	0.358	0.141	0.246	0.449	0.498	0.756	0.344	0.473	0.566	0.334	0.109	0.736	0.361	1.407	1.093	1.438
		orf19.1515	0.547	0.174	0.206	0.355	0.578	0.316	0.761	0.463	0.318	0.644	0.647	0.06	0.621	0.327	1.287	1.069	1.653
		orf19.1516	-0.046	0.151	-0.039	0.005	-0.187	0.071	0.348	0.431	0.342	0.278	0.362	0.033	0.244	0.128	-0.081	0.18	0.71
		orf19.1516	0.005	0.02	-0.031	-0.194	-0.067	-0.072	0.163	0.017	0.091	-0.036	0.031	-0.059	-0.069	-0.011	-0.028	-0.016	0.463
		orf19.1516	0.128	0.043	0.032	0.062	-0.013	0.088	0.363	0.06	0.208	0.349	0.236	-0.013	0.37	0.049	-0.075	0.187	0.872
		orf19.1516	0.146	-0.143	0.071	-0.202	0.081	-0.146	0.139	-0.089	0.005	0.079	0.103	-0.079	0.19	-0.017	-0.297	0.126	0.592
		orf19.1516	0.195	-0.017	0.073	0.178	0.108	-0.02	0.267	0.082	0.065	0.117	0.161	-0.143	0.259	0.023	-0.201	0.246	0.753
		orf19.1517	-0.135	0.139	-0.05	0.011	-0.034	-0.071	0.122	-0.188	-0.225	0.101	-0.187	0.067	-0.329	-0.122	-0.489	-0.93	-0.262
		orf19.1517	0.035	0.038	0.106	0.013	0.097	0.062	0.29	0.071	-0.157	0.133	-0.023	0.16	-0.291	-0.115	-0.682	-1.033	-0.217
		orf19.1519	0.152	0.168	-0.121	-0.269	0.046	0.034	0.308	0.156	0.033	0.24	0.109	0.065	-0.081	0.121	0.962	0.768	0.527
		orf19.1519	0.231	0.158	-0.049	0.209	0.194	-0.121	0.187	0.262	0.308	0.227	0.327	0.214	0.101	0.197	0.795	0.88	0.794
		orf19.1522	-0.178	-0.832	-0.024	-0.788	-0.182	-0.128	-2.338	-0.912	-1.454	-2.347	-1.103	-0.483	-1.473	-0.535	-2.128	-2.44	-4.371
		orf19.1522	0.184	-0.811	0.115	-0.7	0.113	-0.335	-2.444	-1.216	-0.944	-2.009	-1.667	-0.707	-1.642	-0.77	-1.931	-2.371	-4.593
		orf19.1523	-1.334	0.16	-0.206	-0.411	-0.244	0.256	-0.265	-0.38	0.03	0.009	0.26	-0.078	-0.287	-0.231	0.143	0.501	-0.167
		orf19.1523	-0.27	0.202	0.029	0.193	0.019	-0.006	-0.032	0.536	0.868	-0.141	0.014	-0.44	-0.228	-0.132	-1.347	-2.448	0.698
		orf19.1523	-0.064	0.41	0.087	0.273	0.668	0.069	0.383	0.314	0.473	0.597	0.473	0.28	0.322	0.527	-0.378	-1.218	0.547
		orf19.1523	0.19	0.039	0.157	0.054	0.72	-0.211	0.344	-0.252	0.896	-0.196	0.496	0.328	0.619	-0.432	-1.171	-2.157	0.142
		orf19.1523	0.27	-0.092	0.157	0.1	NA	-0.121	0.574	-0.109	0.322	0.088	0.576	-0.021	0.18	-0.175	-1.655	-2.115	0.224
		orf19.1524	-1.315	0.625	-0.172	0.461	-0.687	-0.235	-0.068	0.042	-0.132	0.4	0.432	NA	NA	0.083	NA	NA	NA
		orf19.1524	-0.73	0.15	0.034	-0.465	-0.685	0.04	-0.816	0.242	0.262	NA	-2.414	NA	NA	NA	NA	NA	NA
		orf19.1524	-0.297	0.212	0.091	0.065	-0.377	0.657	1.106	0.347	0.008	0.546	0.817	0.197	0.603	0.478	0.419	0.566	0.126
		orf19.1524	-0.024	NA	0.107	-1.005	0.902	NA	0.284	-0.669	-1.521	NA	-0.436	-0.369	NA	0.174	-0.036	1.726	NA
		orf19.1524	0.592	0.151	0.3	-0.353	1.05	-0.025	0.176	0.454	0.031	-0.994	0.142	0.191	-0.456	0.318	-0.457	-0.799	-0.785
		orf19.1525	-0.172	0.04	-0.149	0.069	0.02	0.035	0.116	0.18	0.191	0.062	0.253	-0.022	0.009	0.019	0.095	-0.048	0.666
		orf19.1525	0.203	0.176	0.141	0.24	0.208	0.053	0.25	0.202	0.114	0.222	0.385	-0.085	0.163	0.076	-0.033	-0.094	0.516
		orf19.1526	-0.304	-0.229	-0.098	-0.126	-0.177	0.034	-0.048	0.05	-0.039	-0.163	-0.073	-0.026	0.13	0.127	0.041	0.421	0.035
		orf19.1526	0.015	-0.305	0.002	-0.341	-0.122	-0.211	-0.138	0.094	-0.147	-0.276	0.027	-0.259	-0.015	0.004	-0.545	-0.207	0.068
		orf19.1527	-0.25	-0.268	-0.037	-0.023	-0.158	-0.051	0.197	0.155	0.076	0.244	-0.116	-0.039	0.314	0.078	-0.038	-0.507	0.136
		orf19.1527	0.435	0.01	0.028	-0.088	0.059	-0.309	0.062	-0.067	0.022	-0.032	-0.025	0.078	-0.024	-0.15	-0.344	-0.802	0.3
		orf19.1528	0.018	-0.022	-0.033	0.096	-0.024	-0.084	-0.274	0.174	0.045	-0.056	0.06	-0.125	0.009	-0.153	-0.106	-0.718	-0.471
		orf19.1528	0.106	0.172	0.127	0.115	0.043	-0.094	-0.232	-0.036	-0.091	0.068	0.298	-0.12	0	-0.026	-0.17	-0.615	-0.477
		orf19.1529	-1.358	0.399	-0.284	0.744	-0.79	0.064	-0.033	-0.059	0.051	-1.027	0.369	-0.959	0.647	-0.039	NA	0.055	0.451
		orf19.1529	0.276	-1.195	0.156	-0.094	-0.642	-0.687	-0.388	-1.584	0.208	-0.195	-0.576	-0.963	-1.046	-0.217	-0.195	0.004	0.007
		orf19.1530	0.342	0.493	-0.373	-0.707	-1.116	0.804	0.017	0.796	0.591	-0.059	0.667	0.069	0.457	-0.932	0.393	0.215	1.184
		orf19.1530	2.233	0.121	0.283	0.484	-0.278	-0.081	0.308	0.14	NA	-0.235	NA	0.193	NA	0.628	NA	0.083	-1.105
		orf19.1531	-0.198	-0.011	0.038	-0.22	-0.123	-0.047	-0.393	0.008	-0.185	-0.363	0.015	-0.028	-0.139	-0.258	-0.452	-0.52	-0.359
		orf19.1531	0.095	0.164	0.158	0.056	0.204	0.175	0.061	0.393	0.264	0.097	0.235	0.259	0.098	0.061	-0.168	-0.106	0.037
		orf19.1532	-0.015	-0.168	-0.007	-0.216	-0.017	-0.016	-0.297	-0.462	-0.402	0.06	-0.432	-0.306	-0.288	-0.24	-0.498	-0.912	-0.734
		orf19.1532	0.063	-0.161	0.053	0.02	0.058	0.018	-0.109	-0.194	-0.172	0.045	-0.204	-0.003	-0.063	-0.104	-0.377	-0.82	-0.275
		orf19.1533	-0.07	-0.081	-0.137	-0.005	-0.03	0.063	-0.631	-0.286	-0.249	-0.452	-0.333	-0.205	-0.215	-0.179	-0.146	-0.184	-0.203
		orf19.1533	-0.059	0.019	-0.011	-0.264	0.061	0.017	-0.512	-0.251	-0.223	-0.538	-0.217	-0.227	-0.55	-0.349	-0.066	-0.137	-0.156
		orf19.1534	0.012	-0.316	-0.224	-0.688	-0.248	0.157	-0.532	-0.363	-0.564	-0.711	-0.528	-0.254	-0.77	-0.467	-1.184	-0.993	-1.229
		orf19.1534	0.103	-0.504	-0.017	-0.247	0.182	-0.062	-0.296	-0.132	-0.433	-0.62	-0.294	0.089	-0.446	-0.366	-1.052	-0.576	-0.773
		orf19.1535	-0.455	-0.071	-0.056	-0.099	-0.069	-0.185	0.134	0.036	0.032	-0.249	0.145	0.095	-0.126	-0.118	-0.523	0.324	0.069
		orf19.1535	-0.119	-0.16	0.022	-0.459	0.063	-0.097	-0.07	-0.283	0.044	-0.388	-0.076	-0.072	-0.415	-0.274	-0.665	0.124	-0.585
		orf19.1536	-0.215	-0.09	-0.251	-0.192	-0.222	-0.283	-0.354	-0.229	-0.227	-0.351	-0.185	-0.057	-0.262	-0.114	-0.243	0.039	0.546
		orf19.1536	-0.14	-0.512	-0.183	-0.403	-0.172	-0.265	-0.623	-0.473	-0.288	-0.518	-0.302	-0.141	-0.254	-0.2	-0.47	0.093	0.423
		orf19.1538	-0.066	-0.068	-0.05	-0.248	-0.014	-0.018	0.167	-0.01	-0.07	-0.149	-0.187	-0.092	0.161	-0.101	-0.142	-0.324	0.191
		orf19.1538	0.024	-0.2	0.149	-0.142	0.087	-0.012	0.129	0.086	-0.099	-0.276	-0.077	-0.046	-0.063	0.022	-0.195	-0.287	-0.112
		orf19.1539	1.504	3.649	1.032	2.406	-0.053	0.536	3.802	2.348	2.579	1.047	1.444	0.261	2.119	2.045	5.578	5.527	1.074
		orf19.1539	1.794	3.347	1.73	2.265	0.335	0.504	3.448	2.009	2.474	1.219	0.948	0.051	2.095	1.526	5.364	5.401	0.739
		orf19.154	-0.246	0.209	-0.208	-0.033	-0.158	-0.09	-0.643	-0.007	-0.256	-0.21	0.321	-0.369	-0.317	-0.256	0.001	-0.704	-0.791
		orf19.154	-0.047	-0.136	-0.114	-0.229	-0.053	-0.041	-0.529	-0.054	-0.322	-0.219	-0.213	-0.099	-0.115	-0.186	0.112	-0.541	-0.484
		orf19.154	-0.03	-0.172	-0.05	-0.201	-0.022	0.026	-0.674	0.057	-0.302	-0.23	-0.086	-0.064	-0.056	-0.114	0.034	-0.542	-0.553
		orf19.154	0.054	-0.19	-0.009	-0.017	-0.002	-0.22	-0.653	0.05	-0.109	-0.12	-0.184	0.002	-0.148	-0.11	-0.072	-0.443	-0.632
		orf19.154	0.094	-0.375	0.101	-0.023	0.137	0.038	-0.62	0.25	0.001	-0.185	0.208	0.084	-0.149	-0.248	0.036	-0.431	-0.73
		orf19.1541	-0.931	NA	-0.369	0.328	-2.747	0.214	0.351	-0.011	0.057	0.638	-0.102	0.169	0.572	0.223	-0.146	0.22	-2.782
		orf19.1541	0.038	-0.236	-0.253	-0.089	-0.369	-0.122	-0.095	0.58	0.726	-0.296	-0.444	-0.033	-0.375	0.24	-1.005	0.511	-2.571
		orf19.1541	0.179	-0.659	0.148	-1.074	0.416	-0.909	-1.199	-1.821	-0.793	-0.747	-0.906	-1.094	-1.525	-1.274	-0.738	-1.048	-2.23
		orf19.1541	0.343	0.059	0.188	-0.165	0.757	-0.282	-0.256	-0.12	0.63	0.043	0.24	-0.048	0.139	-0.135	-1.695	0.581	-2.212
		orf19.1541	NA	0.426	0.638	-0.353	NA	NA	-0.311	0.03	-0.488	-0.756	0.214	-0.04	-0.499	-0.854	-1.38	-0.108	-2.716
		orf19.1542	-0.1	-0.226	-0.121	-0.17	-0.127	0.045	0.093	-0.088	0.131	0.117	-0.14	0.087	0.176	0.099	0.219	0.198	-0.247
		orf19.1542	0.103	-0.311	0.039	-0.226	-0.012	-0.137	0.01	-0.277	-0.184	-0.112	-0.179	-0.142	-0.04	-0.054	0.159	0.06	-0.443
		orf19.1543	-0.59	-0.246	-0.393	0.021	-0.543	-0.23	0.115	-0.024	0.147	-0.104	0.025	-0.147	-0.025	-0.051	0.336	0.398	0.515
		orf19.1543	-0.31	-0.168	-0.265	-0.175	-0.338	-0.386	-0.233	-0.383	-0.374	-0.225	-0.035	-0.375	-0.37	-0.168	-0.191	0.361	-0.069
		orf19.1544	-0.179	-0.073	-0.134	-0.082	-0.307	-0.02	0.021	0.117	-0.028	-0.082	0.041	-0.073	0.073	0.137	0.023	0.55	0.234
		orf19.1544	0.121	0.129	0.122	0.162	0.083	0.144	0.215	0.005	0.286	0.245	0.16	0.214	0.246	0.102	0.239	0.52	0.748
		orf19.1545	-0.2	-0.207	-0.031	-0.143	-0.099	-0.083	-0.734	-0.024	-0.138	-0.376	-0.185	-0.153	-0.303	-0.275	-0.162	-0.312	-0.569
		orf19.1545	-0.124	0.002	0.068	0.145	0.18	0.037	-0.227	0.022	-0.262	-0.021	0.022	-0.029	0.009	0.037	0.207	-0.033	-0.21
		orf19.1546	-0.172	0.067	-0.077	0.123	-0.156	-0.164	-0.199	-0.114	0.261	-0.193	-0.249	0.15	-0.222	-0.082	-0.142	-0.449	-0.427
		orf19.1546	-0.013	0.082	0.079	0.254	-0.037	-0.031	-0.154	-0.014	0.026	0.007	-0.012	0.103	0.013	0.027	-0.02	-0.138	-0.239
		orf19.1547	-0.063	0.324	-0.052	0.169	0.152	0.304	0.455	0.235	0.366	0.389	0.239	0.012	0.158	0.296	0.544	0.1	0.259
		orf19.1547	0.138	0.059	0.097	-0.167	0.322	-0.146	-0.071	-0.056	-0.067	-0.206	0.057	0.059	0.211	0.239	0.028	-0.616	0.267
		orf19.1548	-0.554	0.261	-0.229	0.326	-0.139	-0.069	0.167	0.173	0.066	0.044	0.464	0.198	-0.097	0.339	0.221	-0.184	-0.054
		orf19.1548	-0.441	-0.333	-0.16	-0.243	-0.121	-0.163	-0.352	-0.22	-0.224	-0.359	0.089	-0.124	-0.177	-0.183	-0.083	-0.448	-0.288
		orf19.1548	-0.202	-0.122	-0.071	0.1	-0.063	-0.303	-0.274	-0.018	0.186	-0.185	-0.011	-0.061	-0.151	0.055	-0.074	-0.54	-0.08
		orf19.1548	-0.137	-0.119	0.006	-0.502	-0.052	-0.077	-0.362	-0.164	-0.326	-0.59	0.1	0.091	-0.385	-0.14	-0.281	-0.271	-0.195
		orf19.1548	-0.098	-0.254	0.072	0.152	0.041	0.102	-0.156	-0.209	0.085	-0.266	-0.035	0.117	-0.168	-0.028	-0.11	-0.363	-0.315
		orf19.1549	-0.149	0.082	0.023	0.166	-0.01	0.046	-0.074	-0.027	-0.08	-0.014	-0.022	-0.132	-0.107	-0.029	0.581	0.411	0.186
		orf19.1549	0.106	-0.03	0.055	-0.02	0.047	-0.014	-0.054	0.103	-0.008	0.011	0.145	-0.018	-0.058	-0.24	0.444	0.43	-0.141
		orf19.155	-0.087	-0.148	-0.243	-0.501	-0.323	-0.133	-0.313	-0.236	0.067	-0.37	-0.071	-0.113	-0.339	-0.206	-0.226	-0.272	0.522
		orf19.155	-0.078	-0.13	-0.165	-0.267	-0.208	0.022	-0.152	-0.467	-0.114	-0.074	-0.181	-0.098	-0.069	-0.179	-0.013	-0.248	0.523
		orf19.1551	-0.112	0.332	-0.473	0.019	-0.003	-0.473	0.491	0.396	-0.54	0.325	0.394	0.316	0.288	-0.238	0.425	0.215	-0.468
		orf19.1551	NA	NA	-0.172	-0.048	NA	0.062	0.387	0.542	0.67	-0.278	0.594	0.55	-0.634	-0.859	NA	-1.329	-1.639
		orf19.1552	0.217	0.059	0.115	0.218	0.173	0.152	0.273	0.206	0.021	0.258	0.018	0.193	0.215	0.229	-0.386	-0.315	0.244
		orf19.1552	0.296	0.199	0.122	0.243	0.279	0.128	0.294	0.136	0.128	0.337	0.175	0.16	0.16	0.076	-0.409	-0.328	0.234
		orf19.1553	-0.19	-0.316	-0.294	-0.36	-0.408	-0.317	-0.053	-0.169	0.144	-0.171	-0.171	-0.2	0.065	-0.122	0.336	0.791	0.552
		orf19.1553	0.082	0.021	0.049	0.113	-0.14	0.011	0.357	0.095	0.207	0.317	0.066	0.03	0.305	0.099	0.549	0.997	0.631
		orf19.1555	-0.142	0.173	-0.114	-0.269	-0.004	-0.054	-0.037	0.162	-0.159	-0.124	-0.005	-0.06	-0.141	-0.058	-0.227	-0.347	-0.168
		orf19.1555	-0.099	-0.568	-0.023	-0.449	0.045	-0.196	-0.597	-0.891	-0.417	-0.437	-0.422	-0.565	-0.468	-0.482	-0.816	-0.655	-0.938
		orf19.1557	-0.033	0.153	-0.171	0.278	-0.282	0.059	0.036	0.19	0.18	-0.015	0.146	0.154	0.098	-0.06	0.105	0.07	-0.299
		orf19.1557	-0.011	0.188	-0.061	0.141	-0.039	-0.044	0.054	0.092	0.165	-0.091	0.016	0.158	0.087	-0.136	0.032	0.007	-0.308
		orf19.1557	0.106	0.171	-0.027	0.188	0.133	0.195	0.179	0.165	-0.035	-0.017	-0.242	-0.083	0.156	0.009	0.087	0.071	-0.384
		orf19.1557	0.147	0.173	0.058	-0.017	0.191	0.101	0.067	-0.495	0.144	0.011	-0.36	-0.027	-0.235	-0.301	0.146	-0.141	-0.545
		orf19.1557	0.279	0.296	0.179	0.368	0.337	0.502	0.079	0.455	0.174	0.079	0.207	-0.298	0.073	0.2	0.592	0.007	-0.282
		orf19.1559	0.077	0.191	-0.009	NA	-0.027	0.08	0.847	0.196	0.107	NA	NA	NA	0.243	0.2	NA	NA	NA
		orf19.1559	0.284	0.051	0.086	-0.027	0.257	-0.009	0.223	-0.212	-0.083	0.081	-0.063	-0.068	-0.017	-0.02	-0.002	0.122	0.207
		orf19.156	-0.027	0.154	-0.02	0.287	-0.154	0.022	0.02	-0.089	0.076	-0.215	-0.402	-0.156	-0.296	-0.138	-0.46	0.355	-0.703
		orf19.156	0.28	0.273	0.246	0.16	0.011	0.039	-0.119	-0.507	-0.099	-0.473	-0.303	-0.174	-0.25	-0.143	-0.666	0.391	-0.748
		orf19.1560	0.033	0.074	0.233	0.285	0.127	0.134	0.012	0.065	0.022	-0.114	0.031	-0.046	0.049	0.096	-0.495	0.039	0.042
		orf19.1560	0.148	0.069	0.251	0.172	0.128	0.12	0.016	-0.002	-0.074	-0.042	0.137	0.052	0.041	-0.044	-0.452	0.096	0.007
		orf19.1562	0.234	-0.401	-0.289	-0.703	0.017	-0.254	0.567	0.133	0.01	-1.602	-0.824	-0.654	0.337	0	4.433	3.994	-1.238
		orf19.1562	0.265	-0.609	0.033	-0.425	0.203	-0.117	0.617	-0.023	-0.205	-1.317	-1.026	-0.218	0.434	0.013	4.484	4.089	-1.467
		orf19.1563	-0.863	0.349	-0.258	-0.068	-0.342	0.007	-0.111	-0.372	-0.148	-0.258	-0.234	0.066	-0.257	-0.221	0.222	-0.401	-1.674
		orf19.1563	-0.087	0.015	-0.068	-0.255	-0.146	-0.263	-0.438	-0.344	-0.33	-0.515	-0.361	-0.125	-0.558	-0.199	0.193	-0.339	-1.519
		orf19.1563	-0.005	0.569	-0.047	0.156	-0.117	0.498	0.002	-0.34	-0.119	-0.051	-0.223	0.116	-0.077	-0.067	0.929	0.201	-0.824
		orf19.1563	0.264	-0.307	0.004	0	0.318	-0.352	-0.309	-0.492	-0.528	-0.344	-0.299	-0.109	-0.332	-0.133	0.326	-0.321	-1.428
		orf19.1563	0.85	-0.068	0.247	-0.096	0.696	-0.115	-0.066	-0.141	-0.421	-0.199	-0.395	-0.035	-0.296	-0.122	0.299	0.104	-1.322
		orf19.1564	-0.404	-0.154	-0.426	-0.123	-0.379	-0.198	0.334	0.201	0.325	0.293	0.065	-0.102	0.297	0.201	-0.159	-0.07	1.02
		orf19.1564	-0.047	-0.495	-0.213	-0.281	-0.083	-0.342	0.155	-0.039	0.183	0.203	-0.009	-0.063	0.229	0.149	-0.444	0.04	0.687
		orf19.1565	-0.092	-0.338	-0.121	-0.514	-0.141	-0.107	-0.767	-0.724	-0.311	-0.752	-0.241	-0.266	-0.549	-0.369	-0.81	-1.357	-1.365
		orf19.1565	-0.005	0.112	-0.007	0.154	-0.139	-0.057	-0.306	0.008	-0.034	-0.183	0.004	0.008	-0.142	-0.039	-0.483	-0.947	-0.511
		orf19.1566	-0.21	-0.211	-0.302	-0.338	-0.238	-0.045	-0.916	-0.292	-0.226	-0.46	-0.286	-0.295	-0.258	-0.375	-0.549	-1.214	-0.984
		orf19.1566	-0.156	-0.146	-0.14	-0.428	-0.171	-0.098	-1.002	-0.325	-0.442	-0.81	-0.292	-0.437	-0.449	-0.474	-0.628	-1.31	-1.271
		orf19.1567	-0.189	-0.353	-0.262	-0.081	-0.107	-0.192	-0.055	-0.304	-0.112	0.157	-0.237	-0.139	0.065	0.007	-0.504	-0.552	-0.068
		orf19.1567	-0.144	-0.09	0.01	0.012	0.029	-0.086	-0.122	0.137	-0.091	-0.067	0.247	0.119	-0.042	0.014	-0.567	-0.449	0.137
		orf19.1569	-0.307	0.141	-0.316	-0.293	-0.176	-0.206	-0.825	-0.056	-0.261	-0.575	0.037	-0.228	-0.432	-0.209	-0.598	-0.981	-0.88
		orf19.1569	-0.28	0.021	-0.199	-0.302	-0.15	-0.055	-0.72	0.07	-0.129	-0.456	0.132	-0.059	-0.341	-0.244	-0.64	-0.99	-0.7
		orf19.1570	0.093	0.288	0.07	0.106	-0.023	0.121	0.148	0.112	0.2	-0.04	0.047	0.014	-0.027	-0.014	0.083	0.507	0.629
		orf19.1570	0.322	0.202	0.078	0.16	0.21	0.071	-0.012	0.022	0.093	0.042	0.087	-0.054	0.174	-0.053	-0.013	0.536	0.564
		orf19.1571	0.013	0.764	-0.086	0.165	-0.63	0.279	-0.309	0.915	-0.362	NA	0.531	-0.344	0.389	-0.411	-1.991	0.529	-0.602
		orf19.1571	0.451	-0.22	-0.03	-1.131	0.023	0.495	0.237	-0.481	-0.566	-0.347	-1.312	-0.196	-0.988	-0.26	-0.177	-0.8	-0.753
		orf19.1573	0.097	-0.111	-0.067	-0.26	0.109	-0.054	-0.32	-0.081	0.098	-0.285	0.068	0.118	-0.114	-0.013	-0.64	-1.091	0.239
		orf19.1573	0.348	-0.059	0.013	-0.069	0.237	-0.044	0.031	0.104	-0.015	0.05	-0.007	0.161	0.101	0.329	-0.52	-0.641	0.461
		orf19.1574	-0.642	-0.496	-0.17	-0.293	-0.224	-0.274	-0.3	-0.16	-0.062	-0.202	-0.007	0.065	-0.197	0.084	-0.788	-0.588	-0.057
		orf19.1574	-0.32	-0.306	-0.137	-0.156	-0.199	-0.411	-0.169	-0.092	-0.015	-0.182	-0.192	-0.02	-0.215	0.116	-0.651	-0.746	-0.015
		orf19.1575	-0.206	0.236	-0.204	0.01	-0.074	0.082	-0.391	0.017	-0.209	-0.257	-0.011	0.048	-0.152	-0.234	-0.333	-0.771	-0.982
		orf19.1575	-0.088	0.334	-0.019	-0.007	-0.031	-0.102	-0.47	0.085	-0.226	-0.347	0.058	0.121	-0.253	-0.199	-0.389	-0.651	-0.816
		orf19.1576	-0.371	-0.057	-0.114	0.155	-0.32	-0.03	0.227	-0.055	-0.056	0.111	-0.011	0.029	-0.012	0.035	0.077	-0.145	0.188
		orf19.1576	0.109	-0.148	0.071	-0.004	0.199	-0.427	-0.094	-0.184	0.039	-0.125	0.211	-0.267	-0.401	-0.039	-0.426	-0.647	-0.628
		orf19.1577	-0.107	-0.314	0.08	-0.441	-0.306	-0.13	-0.992	-0.006	0.331	-0.416	-0.202	0.338	-0.088	-0.524	-2.061	-0.915	-2.677
		orf19.1577	NA	-0.426	0.165	0.129	-0.205	-1.258	-0.529	NA	0.329	0.082	-1.612	0.174	0.493	-0.322	-1.491	NA	-2.228
		orf19.1578	-0.285	-0.058	-0.297	-0.272	-0.18	-0.113	-0.844	-0.321	-0.454	-0.448	-0.21	-0.263	-0.379	-0.367	-0.636	-0.963	-1.127
		orf19.1578	0.059	-0.054	0.061	-0.352	-0.142	-0.23	-0.995	-0.254	-0.498	-0.718	-0.065	-0.264	-0.605	-0.403	-0.748	-0.882	-1.488
		orf19.158	-0.281	-0.108	-0.186	-0.575	-0.231	-0.187	-1.489	-0.477	-0.682	-0.945	-0.553	-0.215	-0.776	-0.777	-1.101	-1.511	-1.634
		orf19.158	0.033	-0.083	0.042	-0.34	-0.114	-0.195	-1.285	-0.385	-0.589	-0.724	-0.044	-0.215	-0.666	-0.511	-0.957	-1.394	-1.739
		orf19.1580	0.403	0.028	-0.007	0.193	0.314	0.218	0.529	0.181	-0.013	0.445	0.577	0.187	0.249	0.147	0.175	1.026	0.673
		orf19.1580	0.58	0.312	0.353	0.432	0.425	0.489	0.59	0.585	0.711	0.528	0.354	0.189	0.406	0.292	0.682	1.032	0.811
		orf19.1581	-0.283	0.131	-0.1	0.417	-0.218	-0.03	-0.04	0.18	-0.149	-0.045	0.136	0.352	-0.06	0.087	0.695	0.196	-0.249
		orf19.1581	-0.086	0.875	-0.048	0.245	-0.124	0.064	0.2	0.2	0.47	0.564	0.734	0.07	0.686	-0.41	-0.692	-0.571	-0.144
		orf19.1581	0.314	0.457	0.04	-0.068	-0.032	0.186	0.281	0.521	0.571	0.229	0.581	-0.128	0.401	0.899	0.312	0.097	0.31
		orf19.1581	0.409	0.514	0.12	-0.069	0.536	0.056	-0.028	-0.131	-0.211	0.001	0.263	0.095	-0.28	-0.109	0.68	-0.118	-0.281
		orf19.1581	NA	-0.097	0.138	-0.344	NA	0.156	-0.3	0.584	-0.009	0.311	0.417	0.06	0.076	-0.349	-0.779	-1.24	-0.443
		orf19.1582	-0.486	0.558	0.012	0.586	0.106	-0.171	0.4	0.634	0.357	0.213	0.165	-0.753	-0.381	1.106	0.064	0.14	1.281
		orf19.1582	-0.069	0.445	0.103	0.271	0.436	0.226	-0.071	0.423	0.336	0.523	0.228	-0.073	0.646	-0.009	0.302	-0.457	0.795
		orf19.1582	0.046	0.508	0.15	0.119	0.442	0.228	0.517	0.03	0.595	0.228	0.506	-0.032	0.698	0.624	0.698	-0.071	0.582
		orf19.1582	0.558	-0.54	0.222	0.718	0.77	-0.001	0.217	0.51	0.519	0.667	-0.137	0.15	0.103	0.342	-0.367	-0.415	0.575
		orf19.1582	NA	0.557	0.572	0.101	1.009	0.452	0.326	0.141	0.411	0.202	0.524	0.427	0.243	0.415	0.43	0.409	0.202
		orf19.1584	0.115	0.241	-0.013	0.155	0.215	0.111	0.17	0.096	-0.103	0.189	-0.181	0.198	-0.005	-0.007	1.774	1.508	0.653
		orf19.1584	0.14	0.352	0.089	0.396	0.352	0.452	0.246	0.203	0.201	0.258	0.115	0.443	0.194	0.071	1.708	1.319	0.865
		orf19.1585	NA	-0.035	0.121	0.227	NA	NA	-0.47	-0.344	-0.229	-0.892	-0.304	0.24	-0.453	-0.26	NA	NA	-0.56
		orf19.1585	NA	NA	NA	0.369	NA	NA	-0.421	-0.366	-0.409	-0.797	-0.268	0.271	-0.412	-0.333	NA	NA	-0.549
		orf19.1586	0.521	-0.17	-0.116	-0.323	-0.207	-0.063	0.235	0.182	0.246	0.37	0.118	0.071	0.339	0.139	0.336	0.871	2.95
		orf19.1586	NA	0.467	0.257	0.256	0.038	-0.05	1.07	0.591	0.711	1.086	0.744	0.055	0.829	0.308	1.09	0.232	1.9
		orf19.1587	0.248	0.287	-0.044	0.184	-0.116	0.567	1.002	0.212	0.043	0.909	0.098	0.321	0.501	0.172	2.021	1.266	0.184
		orf19.1587	0.279	0.445	0.002	0.096	0.206	0.174	0.78	0.554	0.537	0.717	0.088	0.357	0.329	0.445	2.108	1.528	0.257
		orf19.1587	0.321	0.626	0.099	0.283	0.25	0.513	0.851	0.478	0.817	0.536	0.55	0.301	0.656	0.577	1.613	1.301	0.389
		orf19.1587	0.6	0.121	0.23	0.272	0.272	0.157	0.423	0.2	0.155	0.539	0.089	0.172	-0.082	0.345	1.595	1.919	-0.246
		orf19.1587	0.732	0.617	0.361	0.083	0.63	0.154	0.336	0.57	0.042	0.298	0.338	0.116	0.197	0.181	1.565	1.85	-0.168
		orf19.1588	0.124	0.19	0.023	0.166	0.022	0.021	0.428	0.093	0.312	0.493	-0.076	0.259	0.282	0.158	0.437	1.211	0.674
		orf19.1588	0.133	0.291	0.054	0.287	0.111	0.187	0.443	0.009	0.146	0.504	-0.064	0.007	0.254	0.234	0.411	1.232	0.746
		orf19.1589	-0.313	-0.066	-0.353	-0.778	-0.327	-0.106	-0.391	0.037	-0.165	-0.289	0.098	-0.372	-0.396	-0.182	-0.418	-0.837	-0.98
		orf19.1589	-0.267	-0.077	-0.039	-0.225	-0.09	0.095	-0.15	-0.202	-0.1	-0.298	0.059	-0.2	-0.024	-0.161	-0.154	-0.703	-0.627
		orf19.1590	-0.262	-0.267	-0.009	-0.047	-0.605	-0.179	0.116	-0.156	0.066	0.161	-0.026	0.004	0.04	-0.106	-0.223	-0.167	-0.062
		orf19.1590	-0.252	-0.341	0.05	-0.48	-0.302	-0.897	-0.919	-0.386	-0.332	-0.499	-0.138	-0.372	-0.392	-0.232	-0.895	-0.895	-0.695
		orf19.1591	0.248	0.155	0.003	0.095	0.256	0.233	0.148	-0.008	0.011	0.098	0.149	-0.098	0.031	-0.092	1.082	0.871	0.564
		orf19.1591	0.277	0.014	0.095	0.111	0.347	0.188	0.083	-0.02	-0.085	0.025	-0.143	0.074	0.04	-0.007	1.182	2.178	0.968
		orf19.1592	0.089	0.169	-0.169	-0.062	0.053	-0.002	-0.114	0.042	-0.096	-0.323	-0.278	-0.074	-0.196	-0.168	0.44	0.168	-0.422
		orf19.1592	0.105	0.09	-0.133	0.243	0.132	0.034	-0.119	0.1	-0.279	0.034	-0.2	-0.036	0.105	-0.038	0.737	0.208	-0.526
		orf19.1595	-0.441	-0.106	-0.035	-0.121	-0.33	-0.102	0.123	-0.245	0.07	0.064	0.117	-0.088	0.004	0.006	0.338	0.541	0.765
		orf19.1595	-0.318	-0.454	-0.025	-0.228	-0.225	-0.367	0.016	-0.172	-0.067	-0.016	-0.106	-0.019	-0.46	-0.341	0.026	-0.445	0.045
		orf19.1596	-0.167	0.36	-0.281	0.212	-0.096	-0.223	0.452	0.386	0.389	0.376	0.342	0.11	0.332	0.082	0.545	1.085	1.765
		orf19.1596	0.012	-0.042	-0.265	-0.112	0.078	0.019	0.427	0.039	0.063	0.415	0.038	-0.165	0.159	0.217	0.783	0.912	2.033
		orf19.1596	0.105	0.146	-0.163	0.113	0.098	0.113	0.364	0.343	0.153	0.268	0.108	-0.015	0.19	0.076	0.57	0.936	1.543
		orf19.1596	0.121	0.169	-0.082	0.154	0.104	0.441	0.523	-0.031	0.169	0.653	0.179	-0.097	0.372	0.192	0.824	0.97	1.859
		orf19.1596	0.206	-0.232	-0.057	-0.141	0.278	0.015	0.251	-0.408	0.096	0.311	0.125	-0.173	0.252	-0.047	0.476	1.115	1.889
		orf19.1597	0.074	0.198	-0.046	0.187	-0.004	0.024	0.218	0.293	0.079	0.218	0.134	0.016	0.132	0.159	0.228	0.448	0.801
		orf19.1597	0.243	-0.057	0.017	-0.065	0.1	-0.059	-0.013	-0.16	-0.069	0.07	-0.146	-0.139	0.002	-0.115	0.037	0.319	0.755
		orf19.1598	0.315	0.287	0.22	0.216	0.302	0.245	-0.258	-0.05	-0.029	-0.339	0.042	0.069	-0.155	0.088	-0.096	0.991	0.91
		orf19.1598	0.41	0.174	0.255	0.135	0.317	0.324	-0.395	-0.157	-0.143	-0.163	-0.105	0.174	-0.062	0.027	-0.102	0.873	1.016
		orf19.1599	-0.285	0.306	0.01	-0.124	-0.45	-0.09	1.613	0.726	1.101	1.631	1.007	-0.071	1.003	0.711	2.069	2.994	1.772
		orf19.1599	-0.083	0.342	0.131	0.164	0.163	-0.299	1.391	1.134	1.107	1.155	1.162	0.268	1.15	0.68	1.933	1.806	1.85
		orf19.1599	-0.054	0.157	0.156	0.494	0.285	-0.029	1.53	0.57	1.145	1.373	1.037	0.117	1.07	0.899	1.876	3.045	1.86
		orf19.1599	0.232	-0.29	0.169	0.622	0.416	-0.318	1.653	0.693	1.036	1.751	1.061	0	1.062	0.953	2.142	3.404	1.91
		orf19.1599	0.333	0.33	0.473	0.292	NA	-0.294	1.495	0.939	1.051	1.379	1.063	0.339	1.124	0.679	1.771	2.971	1.847
		orf19.1600	0.013	0.008	-0.041	0.179	-0.049	-0.171	0.312	0.269	0.492	0.261	0.258	-0.205	0.26	0.182	0.493	1.285	1.148
		orf19.1600	0.056	0.198	0.058	0.143	0.173	0.089	0.415	0.263	0.38	0.555	0.365	0.05	0.372	0.157	0.552	1.338	1.216
		orf19.1601	-0.444	NA	-0.319	0.336	-0.517	NA	-0.19	NA	NA	NA	NA	NA	NA	NA	-0.249	-0.03	NA
		orf19.1601	-0.052	-0.104	-0.097	-0.125	-0.13	NA	-0.673	NA	NA	-0.653	0.125	-0.072	NA	-0.068	-0.744	-0.541	-0.428
		orf19.1601	0.016	NA	NA	NA	-0.041	NA	NA	NA	NA	NA	NA	NA	NA	NA	0.034	-0.211	NA
		orf19.1601	NA	-0.089	NA	-0.138	NA	NA	-0.542	NA	NA	NA	NA	NA	NA	NA	-0.533	-0.328	NA
		orf19.1601	NA	NA	NA	NA	NA	NA	NA	NA	NA	NA	NA	NA	NA	NA	-0.095	-0.201	NA
		orf19.1604	-0.287	-0.259	-0.026	-0.123	-0.058	-0.214	-0.44	-0.283	0.183	-0.182	-0.441	0.126	-0.231	-0.009	-0.758	-1.138	-1.198
		orf19.1604	-0.155	-0.485	0.074	-0.155	0.033	-0.131	-0.377	0.003	-0.008	-0.158	-0.102	0.117	-0.158	0.016	-0.719	-0.946	-1.304
		orf19.1605	-0.158	0.459	-0.103	0.023	-0.165	0.202	-2.684	-1.131	-1.497	-2.247	-1.026	-0.319	-1.767	-0.309	-1.587	1.019	-2.831
		orf19.1605	-0.026	-0.007	0.062	-0.188	0.374	-0.12	-2.868	-1.239	-1.876	-2.376	-0.656	-0.645	-1.352	-0.46	-2.168	0.506	-2.865
		orf19.1606	-0.36	-0.006	-0.008	-0.801	-1.196	-0.28	-1.966	-1.049	-1.283	-2.084	-0.375	-0.352	-1.566	-0.862	-2.658	-0.739	-1.908
		orf19.1606	0.064	-0.311	0.086	-0.427	-0.173	-0.087	-0.41	-0.759	-1.026	-1.489	-0.355	-0.396	-1.063	-0.564	-2.237	1.42	-1.382
		orf19.1607	-0.17	0.193	-0.202	-0.047	-0.29	0.05	-0.275	-0.11	-0.121	-0.126	0.059	0.034	-0.234	-0.165	0.012	-0.448	-1.088
		orf19.1607	0.161	-0.075	-0.018	-0.205	0.118	-0.199	-0.584	-0.309	-0.324	-0.442	-0.226	-0.199	-0.343	-0.244	-0.322	-0.674	-1.264
		orf19.1608	0.26	0.231	-0.153	0.009	0.102	-0.244	0.409	0.254	0.227	0.33	0.332	0.079	-0.194	0.095	0.046	-0.155	1.983
		orf19.1608	0.278	0.045	0.107	0.231	0.205	0.088	0.165	0.268	-0.184	0.149	0.041	0.115	0.267	0.222	-0.162	0.244	2.137
		orf19.1609	-0.786	0.022	-0.094	-0.06	-0.413	-0.008	-0.794	-0.088	-0.433	-0.426	0.173	-0.117	-0.348	-0.053	-0.111	-0.549	-0.777
		orf19.1609	-0.384	-0.146	-0.083	-0.09	-0.189	-0.334	-1.137	-0.171	-0.469	-0.624	0.276	-0.211	-0.456	-0.179	-0.446	-0.547	-1.126
		orf19.1610	-0.386	-0.115	-0.077	-0.057	-0.299	-0.009	0.338	0.156	-0.127	0.146	-0.035	0.05	0.04	0.182	-0.357	-0.936	0.113
		orf19.1610	-0.379	-0.497	-0.062	-0.086	-0.235	-0.078	0.1	-0.498	-0.181	0.134	-0.254	0.031	-0.306	-0.074	-0.402	-1.162	0.238
		orf19.1610	-0.349	0.024	0.032	0.122	-0.213	-0.076	0.426	-0.094	0.051	0.204	-0.207	0.178	0.094	0.176	-0.44	-0.756	0.154
		orf19.1610	-0.317	-0.464	0.071	-0.032	-0.127	0.026	0.227	-0.465	-0.309	0.114	0.087	-0.15	0.276	0.273	-0.626	-0.965	-0.156
		orf19.1610	-0.229	-0.184	0.096	-0.005	-0.039	-0.203	0.381	-0.52	-0.279	0.165	0.234	-0.093	0.079	-0.165	-0.627	-0.785	-0.171
		orf19.1611	-0.441	-0.523	-0.306	-0.767	-0.365	-0.562	-1.001	-0.721	-0.558	-0.931	-0.46	-0.373	-0.568	-0.268	-1.05	-0.36	-1.729
		orf19.1611	NA	-0.227	0.09	0.296	0.031	-0.048	-2.713	-1.155	0.258	-0.576	-0.52	0.418	NA	-0.739	-1.107	NA	-2.925
		orf19.1613	0.045	-0.01	-0.102	-0.409	0.052	0.027	-0.502	-0.31	-0.439	-0.568	-0.303	-0.117	-0.54	-0.333	-0.604	-1.41	-0.698
		orf19.1613	0.124	0.013	0.118	-0.058	0.101	0.188	-0.082	-0.049	-0.298	-0.164	-0.205	-0.085	-0.24	-0.105	-0.629	-0.962	-0.415
		orf19.1614	-0.311	-0.616	-0.202	-0.379	-0.176	-0.068	-0.756	-0.612	-0.209	-0.269	-0.761	-0.329	-0.736	-0.405	-0.17	0.326	-0.623
		orf19.1614	-0.012	-0.136	-0.116	-0.271	-0.03	-0.149	-0.333	-0.381	0.07	-0.109	-0.559	-0.323	-0.389	-0.284	0.223	0.638	-0.609
		orf19.1616	0.289	1.11	0.967	1.84	-0.276	-0.245	2.003	1.875	1.988	2.623	2.296	0.001	1.919	1.541	4.657	4.83	NA
		orf19.1616	0.373	0.934	1.154	1.729	-0.142	0.126	2.053	1.745	2.034	2.684	2.11	-0.112	1.978	1.577	4.766	5.07	NA
		orf19.1617	-0.164	0.207	-0.061	0.154	-0.316	0.076	0.652	-0.056	-0.021	0.519	-0.02	-0.029	0.174	0.228	0.981	1.03	1.152
		orf19.1617	0.256	-0.075	0.085	0.107	0.176	-0.173	0.202	-0.201	0.06	0.086	-0.053	0.062	0.085	-0.1	0.758	0.851	0.967
		orf19.1618	0.286	0.409	0.269	0.173	0.16	0.043	0.672	0.562	0.653	0.762	0.659	-0.163	0.565	0.309	3.385	5.13	NA
		orf19.1618	0.354	0.414	0.324	0.118	0.246	0.136	0.709	0.792	0.807	0.83	0.896	-0.102	0.832	0.429	3.3	5.402	2.282
		orf19.1619	-0.165	-0.163	-0.044	0.007	-0.023	-0.032	0.107	0.107	-0.049	0.067	-0.012	0.037	0.056	0.129	-0.034	0.211	0.521
		orf19.1619	-0.034	-0.243	0.001	-0.363	-0.022	-0.128	-0.148	-0.061	-0.184	-0.275	0.117	-0.224	-0.181	-0.116	-0.265	0.063	-0.057
		orf19.1620	-2.296	NA	-0.15	0.063	-0.799	-0.627	NA	0.421	0.297	NA	NA	NA	NA	NA	NA	1.401	NA
		orf19.1620	NA	NA	-0.075	-0.014	NA	0.118	0.534	-0.81	-1.034	0.187	0.255	-0.105	0.107	-0.484	1.141	2.027	1.073
		orf19.1621	-0.159	-0.244	-0.137	-0.176	-0.149	-0.183	-0.188	-0.256	-0.062	-0.262	-0.229	-0.111	-0.209	-0.051	-0.012	0.087	0.87
		orf19.1621	-0.001	0.087	-0.074	-0.207	-0.138	0.116	0.205	-0.257	-0.087	0.101	-0.264	-0.159	0.016	-0.034	0.327	0.078	0.859
		orf19.1621	0.154	-0.023	0.108	-0.079	-0.01	-0.063	0.151	-0.057	-0.174	0.03	-0.22	0.164	-0.119	-0.075	0.25	0.025	0.96
		orf19.1621	0.312	-0.059	0.16	-0.074	0.186	0.054	0.141	-0.465	-0.212	0.007	-0.073	-0.115	-0.11	-0.134	0.114	0.054	0.82
		orf19.1621	0.363	-0.271	0.223	-0.388	0.197	0.044	-0.216	-0.426	-0.357	-0.253	-0.399	-0.382	-0.29	-0.268	-0.175	-0.067	0.596
		orf19.1622	-0.357	-0.049	0.037	-0.139	-0.048	-0.12	-0.963	-0.831	-0.928	-1.273	-0.552	-0.33	-0.89	-0.357	-0.667	0.016	-1.743
		orf19.1622	-0.116	0.013	0.126	-0.041	0.099	0.064	-1.827	-0.992	-0.938	-1.636	-0.578	-0.3	-0.972	-0.281	-0.985	0.106	-2.219
		orf19.1623	-0.428	-0.249	-0.315	-0.173	-0.461	-0.033	0.459	-0.192	-0.036	0.08	-0.007	-0.073	-0.058	-0.106	-0.159	-0.448	-0.141
		orf19.1623	-0.193	-0.27	-0.099	-0.347	-0.1	-0.171	0.4	-0.062	-0.013	0.057	-0.043	-0.035	0.002	-0.144	-0.271	-0.507	-0.209
		orf19.1624	-0.209	-0.083	-0.356	-0.266	-0.214	-0.127	-0.557	-0.208	-0.313	-0.609	-0.259	-0.157	-0.317	-0.257	0.085	0.415	0.003
		orf19.1624	-0.178	0.006	-0.041	-0.099	-0.142	-0.065	-0.187	-0.132	-0.239	-0.322	-0.086	-0.241	-0.053	-0.149	0.266	0.667	-0.031
		orf19.1625	-0.384	-0.167	-0.228	-0.136	-0.182	-0.085	-0.409	-0.284	-0.239	-0.332	-0.114	-0.122	-0.349	-0.051	0.617	0.294	0.033
		orf19.1625	0.038	-0.182	0.032	-0.134	0.072	-0.107	-0.224	-0.208	-0.359	-0.234	-0.191	-0.091	-0.096	-0.024	0.653	0.299	0.16
		orf19.1626	-0.025	0.054	0.078	0.152	0.017	-0.029	-0.371	0.123	-0.139	-0.368	-0.075	0.08	-0.059	-0.06	-0.267	-0.777	-0.748
		orf19.1626	0.034	0.188	0.078	0.095	0.152	0.03	-0.151	0.254	-0.042	-0.095	0.134	0.295	-0.053	-0.045	-0.155	-0.57	-0.561
		orf19.1628	0.195	0.037	-0.012	0.098	0.018	-0.027	0.606	0.242	0.554	0.71	0.484	0.004	0.457	0.208	0.377	1.133	1.129
		orf19.1628	0.195	-0.372	0.069	-0.135	0.096	-0.234	0.323	0.037	0.263	0.448	0.194	-0.119	0.539	0.268	0.192	1.036	0.952
		orf19.163	-0.168	0.05	-0.107	0.066	-0.189	-0.02	-0.456	-0.172	-0.041	-0.366	-0.017	-0.01	-0.219	-0.07	0.273	-0.287	-0.048
		orf19.163	-0.095	0.156	-0.03	0.112	-0.076	-0.091	-0.541	-0.05	-0.183	-0.143	-0.161	0.053	-0.198	-0.068	0.258	-0.354	-0.054
		orf19.1630	0.08	-0.299	0.095	-0.176	-0.065	-0.281	0.026	0.429	0.298	-0.21	0.249	0.149	0.297	0.076	0.27	0.45	-0.345
		orf19.1630	0.225	-0.111	0.103	0.05	-0.002	0.048	0.284	0.254	0.138	0.159	0.093	0.008	0.262	0.23	0.259	0.44	-0.154
		orf19.1631	-0.154	-0.034	-0.189	-0.077	-0.116	-0.042	-0.68	-0.282	-0.283	-0.593	-0.226	-0.191	-0.395	-0.384	0.23	1.991	2.514
		orf19.1631	0.296	0.006	0.009	-0.198	0.13	0.119	-0.518	-0.281	-0.427	-0.426	-0.188	-0.15	-0.263	-0.253	0.275	2.188	2.383
		orf19.1632	0.241	0	0.062	-0.034	0.143	0.147	0.5	0.025	0.281	0.487	-0.044	0.182	0.173	0.144	-0.299	-0.143	1.078
		orf19.1632	0.325	-0.247	0.071	-0.164	0.289	0.046	0.523	-0.257	0.104	0.483	-0.141	-0.025	0.344	0.177	-0.678	-0.623	1.912
		orf19.1633	-0.534	-0.211	-0.413	-0.818	-0.111	-0.231	-1.313	-0.568	-0.316	-0.78	-0.335	-0.515	-0.811	-0.745	-0.817	-1.652	-1.44
		orf19.1633	-0.148	0.184	0.044	-0.38	0.199	-0.015	-0.962	-0.02	-0.354	-0.628	0.008	-0.04	-0.486	-0.359	-0.666	-1.226	-1.124
		orf19.1634	-0.192	-0.128	-0.072	-0.333	-0.258	-0.214	0.102	-0.174	0.216	-0.078	-0.348	-0.048	-0.175	-0.254	-0.542	-0.274	0.265
		orf19.1634	0.015	-0.194	-0.037	-0.436	-0.013	0.066	-0.01	-0.179	-0.124	-0.027	-0.037	-0.147	-0.006	-0.15	-0.55	-0.136	0.544
		orf19.1635	NA	NA	NA	NA	NA	NA	NA	NA	NA	NA	NA	NA	NA	NA	NA	NA	NA
		orf19.1635	NA	NA	NA	NA	NA	NA	NA	NA	NA	NA	NA	NA	NA	NA	0.098	0.129	NA
		orf19.1636	0.225	0.78	-0.11	0.181	0.133	-0.091	1.765	1.605	1.657	0.499	0.63	0.098	1.557	1.251	2.36	2.134	1.602
		orf19.1636	0.386	0.669	0.024	0.172	0.231	0.042	1.751	1.598	1.569	0.444	0.853	0.37	1.654	1.363	2.368	2.312	1.738
		orf19.1637	-0.181	0.362	-0.11	0.202	-0.134	0.354	0.753	0.76	0.71	0.572	0.529	0.334	0.611	0.56	1.076	1.494	0.998
		orf19.1637	-0.065	0.208	0.02	0.205	0.044	0.101	0.799	0.692	0.589	0.405	0.295	0.1	0.537	0.191	1.11	1.743	1.185
		orf19.1637	0.268	0.243	0.044	0.154	0.115	0.181	0.692	0.392	0.713	0.427	0.172	-0.02	0.613	0.331	1.071	1.292	0.997
		orf19.1637	0.295	-0.008	0.055	0.131	0.222	-0.076	0.463	0.392	0.438	0.304	0.099	-0.113	0.639	0.296	0.95	1.455	1.003
		orf19.1637	0.368	0.165	0.092	-0.041	0.674	-0.039	0.485	0.512	0.644	0.244	0.308	0.368	0.579	0.307	1.002	1.589	0.86
		orf19.1638	-0.437	-0.202	-0.265	-0.046	-0.385	-0.099	0.093	0.136	0.071	0.214	-0.188	0.002	0.337	0.058	-0.275	-0.25	0.656
		orf19.1638	-0.148	-0.295	-0.195	0.073	-0.203	-0.168	0.099	-0.189	0.111	0.191	-0.004	0.206	0.217	0.084	-0.302	-0.287	0.573
		orf19.1639	-0.335	-0.243	-0.025	-0.165	-0.302	-0.166	0.333	-0.033	0.333	0.124	0.011	-0.035	0.223	0.154	0.006	-0.336	0.609
		orf19.1639	-0.304	-0.323	0.127	-0.419	0.179	-0.254	0.168	-0.232	0.429	-0.135	-0.211	-0.124	-0.198	-0.337	-0.342	-0.788	1.186
		orf19.164	0.206	0.54	-0.148	0.239	0.226	-0.026	0.321	0.151	0.007	0.347	0.144	0.633	-0.005	0.22	0.772	0.534	0.884
		orf19.164	0.386	0.463	0.19	0.275	0.242	0.155	0.45	0.03	0.023	0.126	0.101	0.096	0.247	0.468	0.852	0.69	1.13
		orf19.1641	-0.237	0.107	-0.098	-0.123	-1.451	0.229	0.091	0.305	0.182	-0.198	0.729	-0.117	-0.145	0.586	-0.13	0.272	0.579
		orf19.1641	0.019	0.228	0.094	0.168	-0.205	-0.657	-0.157	0.347	0.415	-0.269	0.205	-0.017	0.131	0.041	-0.222	0.109	0.169
		orf19.1641	0.187	0.18	0.161	-0.096	0.214	-0.129	-0.092	0.076	-0.176	-0.055	0.16	-0.282	0.449	-0.069	-0.273	0.204	0.304
		orf19.1641	0.366	-0.032	0.23	0.38	0.891	0.156	-0.028	-0.01	0.149	0.219	0.187	-0.304	0.206	0.019	0.203	0.091	0.262
		orf19.1641	NA	-0.745	0.334	-0.08	NA	0.153	-0.276	NA	NA	-0.012	NA	-0.174	-0.359	-0.169	-0.402	0.33	-0.115
		orf19.1642	-0.923	-0.135	-0.358	-0.111	-0.342	-0.196	-1.034	-0.023	-0.225	-0.409	0.015	-0.029	-0.274	-0.039	-0.418	-0.839	-1.09
		orf19.1642	-0.72	-0.127	-0.232	-0.096	-0.222	-0.186	-1.176	-0.126	-0.291	-0.539	0.082	-0.047	-0.479	-0.072	-0.63	-1	-1.314
		orf19.1643	-0.08	0.155	-0.169	0.202	-0.112	0.102	0.011	0.228	0.157	0.139	0.227	0.209	0.015	0.124	0.349	-0.071	0.288
		orf19.1643	0.233	-0.175	0.063	-0.085	0.221	-0.252	-0.386	-0.058	0	-0.242	0.165	0.056	0.036	0.018	-0.001	0.06	-0.123
		orf19.1646	-0.041	0.039	0.014	0.009	0.083	0.104	-0.457	-0.043	-0.146	-0.183	0.101	-0.055	-0.064	-0.019	-0.253	-0.692	-0.767
		orf19.1646	0.037	0.201	0.097	0.136	0.205	-0.004	-0.306	0.076	-0.026	-0.167	0.217	0.105	-0.098	-0.021	-0.185	-0.746	-0.741
		orf19.1647	-1.565	-0.004	-0.084	-0.3	0.084	-0.435	NA	0.735	NA	NA	-1.245	NA	NA	0.462	NA	NA	NA
		orf19.1647	-0.476	-0.408	0.042	0.353	NA	-0.312	-0.249	0.686	0.068	0.099	0.085	0.273	0.198	0.196	-1.041	-0.38	-0.424
		orf19.1648	-0.304	-0.209	-0.001	-0.194	-0.147	-0.083	-0.07	0.011	-0.085	-0.15	0.088	-0.155	0.252	0.05	0.17	0.685	0.115
		orf19.1648	-0.157	-0.365	-0.001	-0.103	-0.081	-0.213	-0.321	-0.017	0.109	-0.425	0.136	-0.091	-0.131	-0.238	0.046	0.682	-0.28
		orf19.1649	-0.34	-0.082	0.081	0.083	-0.105	0.099	0.022	0.174	0.003	-0.105	0.295	0.148	0.122	0.043	0.463	0.93	-0.016
		orf19.1649	0.043	-0.006	0.149	0.004	0.101	-0.038	-0.017	0.111	-0.068	-0.019	0.142	-0.12	-0.003	-0.031	0.467	0.787	-0.341
		orf19.1650	-0.292	-0.053	-0.167	0.105	-0.241	0.098	-0.009	0.215	-0.1	0.059	0.005	-0.022	0.118	0.065	0.483	0.49	-0.016
		orf19.1650	-0.186	-0.32	-0.127	-0.277	-0.098	-0.124	-0.376	-0.157	-0.165	-0.258	-0.218	-0.111	-0.212	-0.14	-0.071	0.021	-0.406
		orf19.1651	-0.538	0.728	-0.06	NA	-0.454	0.247	1.211	0.335	0.664	-0.089	0.292	-0.323	0.456	0.297	3.842	3.748	-0.069
		orf19.1651	0.075	0.55	0.094	0.154	-0.427	0.373	1.099	0.464	0.676	0.472	-0.012	-0.036	0.591	0.368	4.243	3.439	-0.089
		orf19.1651	0.084	0.641	0.124	0.112	-0.389	0.05	0.76	0.486	0.819	0.193	0.642	-0.096	0.637	0.391	4.167	3.117	-0.078
		orf19.1651	0.351	0.409	0.175	-0.057	-0.291	0.157	1.055	0.776	0.846	0.419	0.221	0.076	0.594	0.215	4.801	4.165	-0.218
		orf19.1651	0.45	0.185	0.291	-0.553	0.437	-0.286	1.029	0.339	0.584	0.363	0.478	-0.206	0.487	0.502	4.638	3.954	0.047
		orf19.1652	-0.047	-0.026	-0.022	0.132	0.012	-0.144	0.183	0.229	0.095	0.203	0.239	0.038	0.145	0.169	0.027	-0.111	0.953
		orf19.1652	0.101	0.05	0	0.082	0.077	-0.074	0.2	0.296	0.063	0.243	0.298	0.233	0.279	0.131	0.067	-0.095	0.942
		orf19.1653	0.063	-0.012	-0.336	0.135	-0.086	-0.026	0.607	0.101	-0.028	0.344	-0.029	0.166	0.027	0.048	0.75	0.463	-0.018
		orf19.1653	0.145	-0.246	-0.008	-0.117	0.031	-0.095	0.16	-0.214	-0.069	0.019	-0.152	0.181	-0.054	-0.112	0.502	0.627	0.041
		orf19.1653	0.198	-0.05	0.027	0.069	0.059	0.203	0.698	-0.161	0.08	0.596	-0.103	0.342	0.276	0.218	0.91	0.606	0.319
		orf19.1653	0.331	-0.138	0.056	-0.015	0.302	0.159	0.462	-0.169	-0.018	0.462	-0.088	0.222	0.124	0.089	0.756	0.577	0.299
		orf19.1653	0.434	-0.193	0.108	0.017	0.524	-0.136	0.308	-0.06	-0.1	0.165	-0.21	0.303	0.074	-0.066	0.437	0.508	-0.082
		orf19.1654	0.04	0.014	-0.052	0.092	0.077	0.1	0.367	0.123	0.152	0.241	-0.146	0.077	0.228	0.098	0.226	0.531	0.338
		orf19.1654	0.131	0.176	0.125	0.148	0.137	0.025	0.419	-0.08	0.055	0.386	-0.119	-0.062	0.27	0.104	0.481	0.53	0.228
		orf19.1655	-0.061	0.774	-0.008	0.499	0.113	0.11	0.83	0.504	0.233	0.971	0.432	0.414	0.904	0.03	1.048	0.987	0.147
		orf19.1655	-0.045	0.649	0.004	0.52	0.146	-0.053	0.738	0.136	0.338	0.226	0.625	0.177	0.335	0.24	1.084	0.7	0.096
		orf19.1655	0.001	0.115	0.098	0.073	0.369	-0.226	0.027	-0.164	0.246	0.452	0.515	-0.051	0.599	0.326	0.635	0.754	-0.193
		orf19.1655	0.121	0.169	0.22	0.482	0.374	0.032	0.232	0.368	0.285	0.275	0.592	0.298	0.777	0.448	0.76	0.817	-0.017
		orf19.1655	0.657	0.138	0.236	0.705	NA	0.252	0.469	-0.03	0.393	0.786	0.924	0.1	0.916	0.504	1.319	0.704	0.325
		orf19.1655.3	0.137	-0.022	0.107	0	0.08	0.164	0.15	-0.474	-0.124	0.148	-0.296	-0.086	-0.261	-0.138	0.714	0.172	0.182
		orf19.1655.3	0.18	-0.196	0.12	0.033	0.253	0.079	0.117	-0.454	-0.155	0.111	-0.288	-0.214	-0.237	-0.173	0.629	0.247	0.479
		orf19.1655.3	0.213	0.009	0.13	0.059	0.26	0.176	0.121	-0.571	-0.163	0.233	-0.325	-0.21	-0.116	-0.192	0.723	0.149	0.285
		orf19.1655.3	0.309	-0.245	0.138	-0.129	0.282	-0.068	-0.068	-0.438	-0.197	0.023	-0.303	-0.18	-0.136	-0.185	0.47	0.145	0.28
		orf19.1655.3	0.331	-0.078	0.165	0.058	0.323	0.225	0.182	-0.276	-0.291	0.143	-0.039	-0.218	-0.222	-0.08	0.718	0.375	0.246
		orf19.1656	-0.169	-0.19	-0.239	0.025	-0.3	-0.005	0.515	-0.043	0.065	0.27	-0.36	0.311	-0.091	0.08	0.266	-0.425	-0.166
		orf19.1656	0.233	-0.618	-0.167	-0.491	0.206	-0.256	0.222	-0.458	-0.266	-0.11	-0.545	0.256	-0.169	-0.027	0.032	-0.607	-0.487
		orf19.1658	-0.509	-0.147	-0.277	-0.227	-0.44	-0.274	-0.2	-0.099	-0.051	-0.39	0.041	-0.231	-0.328	-0.052	-0.262	0.769	0.71
		orf19.1658	-0.426	-0.268	-0.131	-0.253	-0.295	-0.33	-0.218	-0.298	-0.149	-0.303	-0.012	-0.083	-0.389	-0.091	-0.515	0.128	0.445
		orf19.1658	-0.211	-0.029	-0.094	0.047	-0.18	-0.112	0.031	-0.365	0.029	-0.117	-0.136	-0.254	-0.153	0.071	-0.122	0.48	0.854
		orf19.1658	-0.175	-0.259	-0.031	0.049	-0.079	0.013	0.041	-0.204	-0.179	-0.13	-0.257	-0.229	-0.036	-0.021	-0.154	0.62	0.79
		orf19.1658	-0.082	-0.273	0.022	-0.252	-0.064	-0.07	-0.113	-0.186	-0.264	-0.319	-0.08	-0.155	-0.031	0.038	-0.253	0.493	0.743
		orf19.1659	0.044	0.091	0.059	-0.211	-0.024	0.089	0.052	0.239	0.065	0.066	-0.009	0.001	0.013	0.014	-0.186	0.01	0.285
		orf19.1659	0.126	0.22	0.071	0.113	0.109	0.339	0.323	0.108	0.16	0.302	0.145	0.067	0.347	0.254	0.277	0.367	0.698
		orf19.1659	0.294	0.516	0.112	0.303	0.229	0.715	0.599	0.164	0.38	0.661	0.206	0.034	0.231	0.274	0.758	0.418	0.629
		orf19.1659	0.357	0.005	0.169	-0.044	0.312	0.026	0.114	0.014	-0.103	0.115	-0.006	-0.13	0.186	-0.066	-0.167	-0.186	0.277
		orf19.1659	0.717	-0.019	0.231	-0.351	1.017	0.007	-0.277	-0.08	0.142	-0.185	-0.026	0.137	-0.095	-0.086	-0.335	-0.064	0.213
		orf19.166	-0.506	-0.536	-0.35	-0.763	-0.378	-0.452	-0.688	-0.518	-0.509	-0.637	-0.625	-0.293	-0.795	-0.532	-0.845	-1.149	-0.726
		orf19.166	-0.447	0.085	-0.168	-0.269	-0.193	-0.258	-0.377	-0.335	0.324	-0.176	-0.444	-0.043	-0.508	-0.326	-0.522	-0.924	-0.7
		orf19.1661	-0.135	0.17	-0.11	-0.02	-0.155	0.158	-0.296	-0.06	-0.01	-0.105	-0.065	0.097	-0.137	-0.1	0.072	0.202	-0.061
		orf19.1661	0.001	-0.015	0.005	-0.122	0.083	-0.11	-0.282	-0.279	-0.221	-0.229	-0.115	-0.179	-0.102	-0.106	-0.033	0.256	-0.393
		orf19.1662	-0.177	-0.079	-0.133	-0.242	-0.264	0.005	-0.496	-0.388	-0.439	-0.28	-0.138	-0.266	-0.238	-0.231	-0.125	-0.467	-0.499
		orf19.1662	-0.095	-0.163	-0.107	-0.149	-0.187	-0.119	-0.609	-0.205	-0.236	-0.294	0.092	-0.162	-0.23	-0.322	-0.059	-0.442	-0.128
		orf19.1663	-0.448	0.182	-0.258	-0.149	-0.474	0.071	0.182	0.147	0.178	0.123	0.186	-0.127	0.339	-0.028	0.327	0.543	1.267
		orf19.1663	-0.017	-0.354	-0.018	-0.283	-0.295	-0.23	0.128	0.445	0.43	0.209	0.629	-0.128	0.247	0.048	-0.337	-0.402	0.738
		orf19.1664	0	0.01	-0.202	0.193	0.098	0.093	0.743	0.44	0.577	0.448	0.293	0.414	0.532	0.286	0.861	0.485	2.374
		orf19.1664	0.277	-0.502	0.125	0.057	0.187	-0.186	0.256	-0.071	0.11	0.312	0.061	0.077	0.271	-0.02	0.439	0.484	1.894
		orf19.1665	-0.243	-0.152	-0.218	-0.276	-0.406	-0.257	-0.062	-0.141	0.096	-0.149	-0.251	-0.224	-0.012	-0.095	0.024	0.515	0.943
		orf19.1665	0.229	-0.238	0.057	-0.365	-0.06	-0.107	-0.131	-0.383	-0.002	-0.288	-0.368	-0.305	0.005	-0.318	-0.05	0.261	0.941
		orf19.1666	-0.433	0.142	-0.156	-0.025	-0.103	-0.247	0.63	0.608	1.036	0.437	0.545	-0.123	0.678	0.494	1.787	2.358	1.867
		orf19.1666	-0.027	0.311	0.164	0.416	-0.086	-0.053	0.881	0.812	0.852	0.715	0.834	-0.209	0.905	0.797	1.916	2.656	2.214
		orf19.1667	-0.208	-0.189	-0.207	-0.19	-0.352	-0.099	-0.046	0.118	0.162	0.124	0.139	-0.113	-0.009	0.105	-0.285	-0.329	0.335
		orf19.1667	-0.037	-0.07	0.15	-0.008	-0.075	-0.056	0.367	0.455	0.343	0.224	0.343	0.09	0.39	0.352	0.006	-0.019	0.569
		orf19.1667.1	-0.308	0.231	-0.157	0.086	0.02	0.267	0.038	0.16	-0.134	0.034	0.23	0.178	-0.05	0.102	0.086	0.95	-1.765
		orf19.1667.1	-0.245	-0.116	-0.043	-0.155	0.154	0.033	-0.345	-0.181	-0.117	-0.197	0.239	-0.172	-0.465	0	-0.186	0.763	-2.267
		orf19.1668	-0.114	0.116	-0.205	-0.001	-0.145	0.106	-0.694	-0.153	-0.595	-0.581	-0.317	-0.309	-0.555	-0.55	-0.712	-0.092	-0.906
		orf19.1668	0.098	0.105	0	-0.053	0.083	0.236	-0.663	-0.375	-0.536	-0.566	-0.233	-0.156	-0.325	-0.165	-0.639	0.027	-0.647
		orf19.1669	-0.06	0.212	0.043	0.17	-0.027	0.064	0.131	0.704	0.177	0.191	0.2	0.112	-0.007	0.12	0.122	0.202	0.389
		orf19.1669	0.052	0.024	0.118	-0.091	0.218	0.086	0.029	-0.061	0.052	0.026	-0.053	0.144	0.161	0.069	-0.033	0.101	0.415
		orf19.1670	-0.195	0.101	-0.215	0.02	-0.11	-0.098	0.13	0.082	-0.069	0.054	0.082	0.115	0.034	0.255	-0.59	-0.448	0.141
		orf19.1670	-0.004	-0.177	0.036	0.059	0.026	-0.092	0.331	-0.176	0.003	0.289	-0.037	0.035	-0.029	0.144	-0.286	-0.501	0.543
		orf19.1671	0.061	-0.047	-0.03	-0.038	0	-0.034	-0.326	-0.054	-0.231	-0.275	0.086	-0.039	-0.146	-0.125	0.901	1.48	0.794
		orf19.1671	0.415	0.009	0.254	-0.027	0.123	-0.033	-0.378	-0.186	-0.084	-0.22	0.03	0.002	-0.249	-0.051	0.976	1.424	0.452
		orf19.1672	-0.028	0.024	-0.06	0.114	-0.144	-0.03	0.288	0.31	0.327	0.169	0.131	-0.048	0.227	0.208	0.449	1.042	0.707
		orf19.1672	0.053	-0.054	-0.008	-0.018	-0.076	0.066	0.297	0.319	0.248	0.112	0.174	-0.099	0.257	0.034	0.356	1.042	0.507
		orf19.1673	0.046	0.353	0.011	0.25	0.091	0.187	-0.247	0.279	0.029	-0.083	0.262	0.198	0.073	0.12	0.979	0.485	-0.114
		orf19.1673	0.3	0.138	0.021	-0.006	0.129	0.271	-0.146	0.302	0.209	-0.083	0.252	0.336	0.141	0.033	0.777	0.55	-0.123
		orf19.1674	-0.065	-0.066	-0.046	-0.063	-0.221	0.043	0.021	-0.047	0.218	0.088	-0.156	-0.226	0.089	-0.108	-0.035	-0.03	0.58
		orf19.1674	0.138	-0.284	0.038	-0.344	0.126	-0.083	-0.146	-0.129	-0.081	-0.166	-0.075	-0.204	0.112	-0.083	-0.191	0.075	0.381
		orf19.1675	-0.02	-0.206	-0.077	-0.364	0.001	-0.02	-0.177	-0.132	-0.102	-0.164	-0.009	0.092	-0.058	-0.068	-0.187	0.023	0.085
		orf19.1675	0.329	-0.451	-0.026	-0.463	0.248	-0.083	-0.312	-0.363	-0.148	-0.309	-0.341	-0.166	-0.092	-0.151	-0.304	-0.467	-0.067
		orf19.1676	-0.096	-0.426	-0.061	-0.654	-0.01	-0.374	-0.736	-0.206	-0.247	-0.469	-0.431	-0.034	-0.361	-0.354	-1.313	-2.393	-1.016
		orf19.1676	0.101	-0.432	-0.034	-0.318	0.025	-0.015	-0.232	-0.474	-0.172	-0.136	-0.09	-0.03	-0.152	0.011	-1.25	-1.907	-0.851
		orf19.1677	-0.484	-0.142	-0.28	-0.288	-0.375	-0.258	-0.307	-0.084	0.032	-0.369	-0.179	-0.041	-0.198	-0.313	0.03	-0.047	-0.401
		orf19.1677	-0.345	0.079	-0.16	-0.293	-0.338	-0.071	-0.395	-0.047	-0.26	-0.3	0.046	0.09	-0.221	-0.104	-0.288	0.013	-0.429
		orf19.1678	-0.865	-0.369	-0.54	-0.489	-0.674	-0.464	-0.552	-0.348	-0.203	-0.64	-0.282	-0.239	-0.44	-0.215	-0.446	-0.385	-0.686
		orf19.1678	-0.623	-0.49	-0.419	-0.553	-0.431	-0.45	-0.837	-0.324	-0.164	-0.881	-0.223	-0.367	-0.404	-0.44	-0.818	-0.611	-0.917
		orf19.1679	0.036	0.053	-0.074	-0.383	-0.596	-0.48	-0.324	-0.115	-0.254	-0.412	-0.237	-0.227	-0.339	-0.198	-0.476	0.171	0.575
		orf19.1679	0.642	0.224	0.105	0.113	0.788	0.901	0.718	-0.135	0.077	0.351	0.156	0.102	0.404	0.301	1.4	0.632	0.432
		orf19.168	0.078	0.148	-0.125	-0.076	-0.089	-0.075	-0.536	0.152	-0.068	-0.201	0.088	-0.2	-0.154	-0.073	-0.108	-0.585	-0.607
		orf19.168	0.296	0.209	0.089	0.138	0.252	0.23	-0.235	0.296	0.218	0	0.36	0.065	0.085	0.051	0.067	-0.16	-0.339
		orf19.1680	0.026	-0.163	-0.021	-0.239	-0.081	-0.172	-0.086	-0.18	0.038	-0.126	-0.23	-0.19	0.056	-0.082	-0.031	0.634	0.587
		orf19.1680	0.148	-0.121	0.008	-0.037	-0.02	-0.121	0.059	-0.121	0.027	0.046	0.114	-0.107	0.097	-0.004	0.129	0.744	0.675
		orf19.1681	-0.406	-0.605	-0.142	-0.046	-0.117	-0.256	0.143	-0.091	0.097	0.074	-0.014	-0.1	0.248	0.065	0.266	0.36	0.862
		orf19.1681	-0.331	-0.401	-0.073	-0.147	-0.045	-0.009	0.154	-0.08	-0.006	0.003	-0.039	-0.09	0.264	-0.024	0.222	0.42	0.698
		orf19.1682	-0.256	-0.21	-0.085	-0.046	-0.209	-0.019	-0.206	-0.231	-0.162	-0.239	-0.141	-0.147	-0.085	-0.075	0.495	0.251	0.129
		orf19.1682	0.06	-0.075	0.123	-0.011	0.092	0.104	-0.008	-0.074	0.002	-0.054	0.202	0.157	0.202	0.098	0.648	0.392	0.384
		orf19.1683	-0.177	-0.07	-0.17	-0.085	-0.157	0.013	0.131	-0.188	-0.105	0.095	-0.209	-0.002	0.213	-0.097	-0.089	0.016	0.383
		orf19.1683	0.014	-0.29	-0.015	-0.205	-0.039	-0.157	0.132	0.04	0.069	-0.019	-0.053	0.137	0.087	-0.047	-0.383	0.03	0.346
		orf19.1684	-0.292	0.119	-0.008	-0.129	-0.262	0.046	0.521	0.022	0.243	0.403	-0.109	0.101	0.064	0.232	1.122	0.744	0.33
		orf19.1684	0.115	-0.112	-0.002	-0.076	0.019	-0.053	0.408	0.037	0.271	0.127	-0.092	0.263	0.137	0.171	0.735	0.546	0.094
		orf19.1685	-0.224	0.368	-0.328	-0.01	-0.244	-0.024	0.633	0.153	-0.012	0.212	-0.14	-0.071	0	-0.011	0.999	0.251	0.029
		orf19.1685	0.066	-0.442	0.165	-0.368	0.193	-0.055	0.305	-0.769	-0.325	-0.105	-0.114	0.272	-0.012	-0.005	0.546	-0.126	-0.182
		orf19.1686	0.024	0.109	0.033	0.294	-0.165	0.07	0.015	-0.05	0.298	0.044	0.108	0.019	0.068	-0.1	-0.008	-0.519	-0.225
		orf19.1686	0.227	-0.068	0.185	-0.001	0.049	-0.161	0.04	-0.148	-0.001	0.019	0.07	-0.052	0.27	-0.051	0.013	-0.383	-0.031
		orf19.1687	-0.1	0.083	-0.068	0.097	-0.022	0.022	-0.666	0.914	-0.185	-0.272	0.208	-0.02	-0.207	-0.044	-0.312	-0.36	-0.789
		orf19.1687	-0.074	0.17	0.122	0.119	0.04	-0.023	-0.656	0.089	-0.116	-0.216	0.214	0.065	-0.116	-0.126	-0.211	-0.416	-0.817
		orf19.169	-0.131	0.211	-0.182	-0.09	-0.176	0.047	-0.093	0.038	-0.077	-0.178	-0.102	-0.085	-0.1	-0.212	-0.004	-0.363	-0.022
		orf19.169	0.213	-0.148	-0.147	-0.208	0.112	-0.012	-0.384	-0.401	-0.201	-0.082	-0.223	-0.261	-0.252	-0.291	-0.102	-0.575	-0.079
		orf19.1690	0.253	0.145	0.21	0.057	0.018	-0.109	-0.119	0.015	0.051	-0.18	0.25	-0.26	0.134	0.11	2.229	3.501	2.421
		orf19.1690	0.416	0.291	0.229	0.141	0.397	0.163	0.182	0.233	0.182	0.037	0.296	-0.106	0.143	0.178	NA	3.703	NA
		orf19.1691	-0.082	-0.653	-0.564	-0.218	0.48	0.087	NA	-0.316	0.291	NA	-0.327	NA	0.324	0.365	NA	0.41	-0.617
		orf19.1691	0.123	-0.503	-0.233	-0.084	0.695	0.261	NA	-0.197	0.294	NA	NA	NA	NA	NA	NA	0.324	-0.452
		orf19.1693	-0.007	-0.012	0.219	0.22	0.078	0.106	0.473	0.383	0.393	0.663	0.496	0.275	0.497	0.427	0.823	1.93	2.43
		orf19.1693	0.071	0.025	0.287	0.194	0.234	0.091	0.467	0.258	0.39	0.641	0.609	0.176	0.569	0.499	1.023	2.002	2.298
		orf19.1697	-0.466	-0.093	-0.119	-0.143	-0.225	0.055	-0.757	-0.01	-0.347	-0.392	-0.03	-0.056	-0.343	-0.047	-0.481	-0.997	-0.748
		orf19.1697	-0.306	-0.209	-0.102	-0.211	-0.18	-0.186	-0.836	-0.273	-0.318	-0.341	-0.257	-0.285	-0.169	-0.156	-0.428	-1.024	-0.837
		orf19.1698	-0.364	-0.024	-0.287	-0.073	-0.382	-0.177	0.095	0.078	-0.024	-0.045	-0.118	-0.033	0.05	0.091	0.222	0.318	0.819
		orf19.1698	0.107	0.224	0.08	0.094	0.014	0.047	0.479	-0.01	0.14	0.384	0.035	-0.015	0.254	0.205	0.45	0.409	0.971
		orf19.1699	0.053	0.146	-0.052	0.011	-0.203	0.013	0.272	0.129	0.26	0.428	0.047	0.254	0.207	0.167	-0.1	0.215	0.739
		orf19.1699	0.078	0.001	0.068	-0.227	0.127	-0.166	0.067	0.185	0.093	0.155	0.125	0.111	0.123	0.214	-0.338	0.231	0.584
		orf19.17	-0.039	0.196	0.049	-0.263	-0.044	-0.122	-0.555	-0.114	-0.206	-0.341	-0.108	-0.61	-0.164	-0.321	0.259	0.005	0.595
		orf19.17	0.096	-0.178	0.267	-0.002	0.011	-0.01	-0.033	0.043	0.069	0.16	0.076	-0.065	0.241	0.153	0.498	0.261	1.224
		orf19.1700	-0.078	NA	NA	NA	NA	NA	-0.348	NA	NA	NA	NA	NA	NA	NA	-0.217	-0.291	NA
		orf19.1700	NA	NA	NA	NA	NA	NA	NA	NA	NA	NA	NA	NA	NA	NA	-0.096	-0.172	NA
		orf19.1701	0.305	0.472	-0.001	0.329	0.083	0.169	0.41	0.176	0.022	0.137	0.309	0.165	-0.101	-0.207	1.061	0.405	-0.172
		orf19.1701	0.343	0.331	0.105	0.121	0.188	0.22	0.446	0.104	-0.077	0.241	0.087	0.048	-0.112	-0.122	1.064	0.149	-0.049
		orf19.1702	-0.047	-0.203	0.057	-0.143	0.013	-0.043	0.323	0.004	0.235	-0.287	0.163	-0.427	0.062	-0.239	0.371	1.735	0.409
		orf19.1702	0.03	0.127	0.076	0.105	0.044	0.073	0.421	0.417	0.291	-0.046	0.222	-0.141	0.376	0.164	0.614	1.831	0.747
		orf19.1704	0.171	0.119	0.109	0.244	0.265	0.185	0.683	0.346	0.378	0.613	0.427	0.245	0.472	0.212	-0.275	-0.291	0.718
		orf19.1704	0.182	0.248	0.168	0.296	0.288	0.101	0.541	0.343	0.361	0.408	0.268	0.202	0.56	0.227	-0.309	-0.481	0.792
		orf19.1704	0.341	0.211	0.177	0.377	0.321	0.242	0.888	0.554	0.576	0.876	0.589	0.248	0.686	0.516	0.636	0.447	1.181
		orf19.1704	0.342	0.334	0.267	0.055	0.396	0.104	0.537	0.232	0.311	0.476	0.384	0.195	0.282	0.273	-0.418	-0.533	0.667
		orf19.1704	0.427	-0.101	0.286	0.355	0.442	0.199	0.52	0.552	0.664	0.488	0.5	0.088	0.555	0.224	-0.424	-0.177	0.604
		orf19.1706	-1.181	-0.373	-0.071	-0.224	-0.132	0.138	-0.463	-0.856	-0.471	-0.416	-0.457	-0.413	-0.527	-0.525	-0.228	-1.19	-0.856
		orf19.1706	-0.076	NA	0.167	-0.632	-0.118	-0.195	0.04	-0.377	-0.589	2.051	0.447	0.213	NA	0.393	NA	-0.006	NA
		orf19.1707	-0.297	-0.31	-0.302	-0.366	-0.307	-0.418	-0.623	-0.366	-0.319	-0.4	-0.377	-0.287	-0.338	-0.323	-0.556	-0.917	-0.218
		orf19.1707	-0.23	-0.306	-0.124	-0.568	-0.214	-0.363	-0.783	-0.466	-0.415	-0.823	-0.443	-0.251	-0.75	-0.581	-0.591	-0.96	-0.272
		orf19.1708	-0.275	0.561	-0.149	0.225	-0.078	0.343	-0.358	0.096	0.057	0.047	0.306	0.17	-0.063	-0.052	0.075	-0.583	-0.598
		orf19.1708	0.104	-0.068	0.038	0.118	0.509	0.081	-0.882	0.01	-0.452	-0.267	0.013	0.027	-0.349	-0.236	-0.272	-0.962	-1.142
		orf19.1709	0.027	0.142	-0.036	0.172	-0.02	-0.192	0.466	0.257	0.402	0.421	0.183	0.154	0.357	0.177	0.439	0.339	1.827
		orf19.1709	0.186	0.073	0.068	0.258	0.107	-0.104	0.513	0.352	0.249	0.57	0.17	0.148	0.378	0.162	0.571	0.426	1.676
		orf19.171	-0.334	0.163	-0.037	-0.196	-0.223	0.087	-0.609	0.045	-0.144	-0.391	0.137	-0.218	-0.096	-0.168	0.681	0.309	-0.415
		orf19.171	-0.003	-0.163	0.013	-0.132	-0.109	0.014	-0.583	0.243	-0.049	-0.378	0.324	-0.192	0.101	-0.114	0.709	0.421	-0.409
		orf19.1710	-0.184	-0.095	-0.118	-0.294	-0.313	-0.11	-0.133	-0.106	-0.053	-0.222	-0.048	-0.093	-0.075	-0.088	0.931	0.243	-0.13
		orf19.1710	0.236	0.141	0.064	0.116	0.199	0.193	0.164	-0.058	-0.121	0.255	-0.089	-0.04	0.046	0.035	1.195	0.347	0.065
		orf19.1711	-0.416	-0.203	-0.2	-0.114	-0.246	-0.178	0.142	-0.182	-0.119	0.098	-0.182	-0.071	-0.013	-0.049	0.003	-0.137	0.423
		orf19.1711	-0.312	-0.12	-0.039	-0.044	-0.2	-0.033	0.178	-0.203	-0.164	0.039	-0.124	0.201	0.174	0.143	0.118	0.035	0.596
		orf19.1712	-0.366	-0.118	-0.192	-0.135	-0.422	-0.018	0.136	0.081	0.058	0.019	-0.199	-0.223	0.253	-0.021	0.048	0.122	0.321
		orf19.1712	0	-0.337	-0.104	-0.297	-0.032	-0.303	-0.065	-0.028	0.046	-0.164	-0.078	-0.264	0.058	0.059	-0.096	0.121	0.349
		orf19.1714	0.142	0.773	0.24	-0.723	-0.077	0.104	0.025	-0.35	-2.507	1.487	-0.369	-1.403	-1.324	NA	3.989	3.784	2.374
		orf19.1714	0.375	0.236	2.872	0.094	0.173	0.338	-0.666	-0.239	-0.296	0.311	1.583	-0.402	0.288	0.084	2.209	4.641	2.898
		orf19.1715	-0.405	-0.114	-0.179	0.166	-0.379	-0.127	-0.056	0.133	0.092	-0.192	0.023	-0.045	-0.018	-0.122	0.756	1.64	0.483
		orf19.1715	-0.291	0.174	-0.096	0.234	-0.262	0.167	0.148	0.204	0.13	0.089	0.152	0.046	0.234	0.228	0.928	1.637	0.732
		orf19.1715	-0.178	0.161	-0.062	0.137	-0.209	-0.165	-0.05	-0.171	0.041	-0.188	-0.02	0.021	-0.017	-0.126	0.432	1.441	0.681
		orf19.1715	-0.088	0.121	0.015	0.299	-0.154	-0.081	0.224	-0.093	0.162	-0.024	-0.034	0.026	-0.052	-0.03	0.882	1.631	0.443
		orf19.1715	-0.068	0.119	0.096	0.183	-0.019	-0.126	0.041	-0.044	-0.067	0.128	0.189	-0.062	0.091	0.039	0.763	1.791	0.385
		orf19.1716	-0.157	-0.055	-0.006	0.03	-0.172	0.022	-0.313	-0.054	-0.29	-0.235	-0.145	-0.047	-0.195	-0.088	-0.343	-0.624	-0.446
		orf19.1716	-0.088	-0.056	0.059	-0.069	-0.057	-0.106	-0.485	-0.052	-0.221	-0.295	-0.031	-0.145	-0.215	-0.056	-0.441	-0.547	-0.598
		orf19.1717	-0.214	0.13	-0.206	-0.071	-0.308	-0.193	-0.243	-0.232	-0.074	-0.159	0.102	0.15	-0.278	-0.339	-0.291	-0.686	0.296
		orf19.1717	-0.172	0.051	0.068	-0.018	-0.001	-0.206	-0.156	0.139	-0.076	-0.061	0.063	-0.144	-0.046	0.005	0.073	-0.515	0.269
		orf19.1718	-0.253	0.095	-0.457	-0.404	-0.065	-0.077	0.113	0.199	0.188	-0.033	0.24	-0.08	0.054	-0.076	0.393	0.171	0.034
		orf19.1718	-0.02	-0.051	-0.217	-0.139	-0.039	-0.19	0.251	-0.098	0.126	0.477	-0.031	-0.17	0.214	-0.016	0.429	0.192	-0.018
		orf19.1719	0.138	0.206	-0.129	0.099	0.082	-0.011	0.29	0.142	0.173	0.24	0.171	0.168	0.239	0.107	0.136	-0.715	0.438
		orf19.1719	0.202	-0.298	-0.017	-0.367	0.201	-0.065	0.093	-0.205	-0.133	-0.033	-0.252	-0.033	-0.01	-0.155	-0.384	-0.738	-0.12
		orf19.172	-0.428	-0.224	-0.124	-0.194	-0.235	-0.051	-0.894	-0.039	-0.383	-0.516	-0.218	-0.17	-0.337	-0.246	-0.3	-0.732	-0.784
		orf19.172	-0.268	-0.011	-0.103	0.043	-0.127	0.056	-0.899	-0.12	-0.342	-0.324	-0.016	-0.062	-0.28	-0.135	-0.122	-0.59	-0.734
		orf19.1720	-0.342	0.113	-0.191	-0.121	-0.273	-0.247	-1.551	-0.704	-0.649	-1.279	-0.56	-0.378	-1.168	-0.447	-1.635	-0.242	-1.008
		orf19.1720	-0.329	0.009	-0.086	-0.253	-0.139	0.138	-1.707	-0.918	-1.068	-1.197	-0.883	-0.626	-1.006	-0.504	-1.798	-0.56	-1.167
		orf19.1721	-0.505	-0.215	-0.512	-0.345	-0.558	-0.107	-0.606	0.127	-0.341	-0.313	-0.157	0.093	-0.114	-0.111	1.303	-1.007	-0.262
		orf19.1721	-0.353	-0.14	-0.171	-0.396	-0.338	-0.026	-0.481	-0.17	-0.323	-0.129	0.013	-0.055	-0.202	-0.136	1.058	-0.833	-0.256
		orf19.1722	-0.35	0.642	-0.112	0.163	-1.645	-0.128	0.681	0.868	0.692	0.084	0.532	0.351	0.826	0.325	3.906	1.98	-0.114
		orf19.1722	0.089	NA	0.151	0.159	0.274	-0.306	-0.423	-3.021	0.012	NA	-0.6	-0.142	0.042	0.56	-0.065	-0.171	-0.239
		orf19.1722	0.159	0.776	0.188	0.061	0.277	-0.092	0.523	-0.17	0.044	0.393	0.12	0.165	-0.403	1.1	0.256	0.13	0.303
		orf19.1722	1.636	0.285	0.295	0.744	0.483	0.164	0.534	0.17	0.045	0.54	-0.399	0.148	0.438	1.099	NA	0.087	0.831
		orf19.1722	NA	0.414	0.356	-0.038	NA	-0.082	1.977	1.437	1.494	1.162	1.08	-0.074	1.604	0.901	5.304	3.701	0.424
		orf19.1723	0.169	-0.018	-0.184	0.102	-0.031	-0.073	0.41	0.389	0.108	0.329	0.08	0.031	0.388	0.051	0.555	0.185	-0.249
		orf19.1723	0.215	-0.183	-0.093	0.117	0.301	-0.006	0.35	0.262	0.15	0.351	0.272	0.086	0.344	0.135	0.529	0.416	0.018
		orf19.1724	0.029	0.394	-0.1	0.641	0.409	-0.272	NA	NA	1.448	NA	NA	NA	NA	NA	4.136	1.832	NA
		orf19.1724	0.095	0.368	-0.087	-0.434	0.692	-0.475	0.189	0.806	-0.145	-0.508	0.652	NA	0.532	-0.168	3.752	1.904	-0.11
		orf19.1724	0.19	NA	-0.032	1.44	NA	0.507	0.425	0.661	0.523	1.055	-0.421	0.179	0.795	-0.986	3.178	1.414	NA
		orf19.1724	NA	0.769	0.011	-0.33	NA	0.475	-0.539	-0.674	0.135	-1.509	NA	NA	NA	0.339	2.39	1.421	NA
		orf19.1724	NA	-0.298	0.368	0.189	NA	-0.734	0.454	-0.212	0.254	-0.003	-0.139	0.419	0.457	0.79	1.435	2.123	NA
		orf19.1725	1.449	1.787	-0.144	-0.228	-0.157	-0.03	3.635	2.058	2.821	-0.405	-0.269	-0.192	3.015	2.085	NA	NA	-0.168
		orf19.1725	1.485	2.066	-0.035	0.301	-0.154	0.189	3.834	2.455	3.107	0.212	0.176	0.079	3.296	2.099	NA	NA	0.463
		orf19.1725	1.586	1.974	-0.027	-0.148	0.037	0.181	3.915	2.273	2.948	-0.039	-0.225	-0.038	3.36	2.259	NA	NA	0.127
		orf19.1725	1.606	1.925	-0.017	-0.155	0.046	0.205	3.453	2.133	2.719	0.039	-0.433	-0.243	3.355	1.915	NA	NA	-0.185
		orf19.1725	1.748	1.84	-0.016	0.004	0.253	-0.11	NA	2.416	3.003	-0.282	-0.044	-0.077	NA	2.336	NA	NA	0.225
		orf19.1727	-0.119	0.343	-0.092	0.136	-0.404	-0.02	0.631	0.364	0.529	0.546	0.411	0.138	0.235	0.196	1.82	2.179	1.985
		orf19.1727	0.179	0.552	0.035	0.347	-0.041	0.158	0.862	0.452	0.514	0.742	0.46	0.058	0.391	0.32	1.948	2.147	2.124
		orf19.1727	0.335	0.477	0.148	0.439	0.043	0.058	0.828	0.445	0.723	0.685	0.501	0.067	0.261	0.412	1.867	2.117	2.078
		orf19.1727	0.406	0.37	0.21	0.033	0.199	0.061	0.549	0.107	0.281	0.632	0.257	-0.09	0.418	0.145	1.704	2.143	1.96
[truncated: 13,745 more rows]

## Sheet: fold change average data
ORF	Alternative Name	CGD Description	WT+(P)/WT-(P) average of two samples 4 hr	tec1+(P)/tec1-(P) average of two samples 4 hr	cph1+(P)/cph1-(P) average of two samples 4 hr	WT+(B)/WT-(B) average of three samples 4 hr	tec1+(B)/tec1-(B) average of two samples 4 hr	cph1+(B)/cph1-(B) average of one sample 4 hr	wor1+(B)/wor1-(B) average of two samples 4 hr	WT+(B)/WT-(B) one sample 24hr	wor1+(B)/wor1-(B) one sample 24hr	WT+(B)/WT-(B) one sample opaque cell 4 hr
orf19.668	orf19.668	Predicted ORF in Assemblies 19, 20 and 21	-0.524586	-0.612134	0.0657948	-5.64601	-5.47394	-1.67823	-2.65235	-6.33843	-1.63303	-12.3534
orf19.4853	HCM1	Protein with forkhead domain; similar to S. cerevisiae Hcm1p	0.0397986	-0.550842	0.030075	-5.42596	-5.20911	-1.61311	-2.64402	-5.60907	1.11198	-4.64604
orf19.95	orf19.95	Predicted ORF in Assemblies 19, 20 and 21	1.33251	0.558042	1.18546	-4.84049	-4.36906	-1.31871	-2.58015	-4.90487	1.33498	-26.816
orf19.7564	DPB2	Probable subunit of DNA polymerase II (DNA polymerase epsilon), similar to S. cerevisiae Dpb2p; essential for viability	-0.0153296	-0.0593978	-0.0269228	-4.73198	-3.91615	-1.50426	-2.30235	-5.96699	-1.28209	-5.89311
orf19.4765	PGA6	Putative GPI-anchored cell-wall protein of unknown function; similar to S. cerevisiae Ccw12p/Ylr110cp; transcriptionally regulated by iron; expression greater in high iron; upregulated upon Als2p depletion	1.22363	0.588158	1.24267	-4.6991	-4.62111	-1.4226	-2.48108	1.3841	9.08729	-1.13819
orf19.5242	orf19.5242	Predicted ORF in Assemblies 19, 20 and 21	-0.224228	-0.507299	-0.184121	-4.66129	-4.04773	-1.53131	-2.48889	-16.0903	-2.6651	-3.03129
orf19.7634	MCD1	Protein similar to S. cerevisiae Mcd1p; transcription is repressed in response to alpha pheromone in SpiderM medium	1.06681	0.49645	0.530926	-4.65361	-5.66178	-1.73038	-2.58169	-5.90185	-1.17842	-10.2748
orf19.7017	orf19.7017	Predicted ORF in Assemblies 19, 20 and 21	-0.0495771	-0.49268	-0.626377	-4.54526	-4.29852	-1.39122	-2.11944	-3.55584	1.51097	-1.49632
orf19.4257	INT1	Integrin-like protein; role in morphogenesis, adhesion, and mouse cecal colonization and systemic virulence; similar to S. cerevisiae Bud4p (has role in bud site selection); structurally similar to alpha-subunit of human leukocyte integrins	0.0171304	-0.2045	0.570987	-4.48922	-4.91044	-1.42999	-2.55636	-2.39673	-1.31933	-10.5546
orf19.6022	orf19.6022	Predicted ORF in Assemblies 19, 20 and 21; downregulated during core stress response	-1.29231	-1.13203	-1.25484	-4.36538	-4.8673	-1.77809	-2.95641	-5.52488	-1.78142	-16.0147
orf19.1605	PMS1	Protein described as DNA mismatch repair factor; ortholog of S. cerevisiae PMS1 which is an ATP-binding protein involved in DNA mismatch repair	-0.44105	-0.0383014	0.059583	-4.12841	-3.3875	-1.4056	-2.14263	-3.74912	1.72331	-7.20052
orf19.5779	RNR1	Protein similar S. cerevisiae Rnr1p, large subunit of ribonucleotide reductase; expression greater in low iron; transposon mutation affects filamentous growth; farnesol upregulated in biofilm; regulated by tyrosol and cell density	1.1908	-0.00211031	1.12719	-4.10577	-4.60549	-1.43429	-2.47063	-3.86307	1.94587	-6.59559
orf19.1445	ESC4	Protein similar to S. cerevisiae Esc4p, which represses transposition; transposon mutation affects filamentous growth	1.17281	0.0213212	0.0509574	-4.08039	-4.43209	-1.82092	-2.73572	-6.0749	-0.0645376	-8.90189
orf19.3207	CCN1	G1 cyclin; required for hyphal growth maintenance	0.0347997	0.167605	-0.486277	-4.06971	-4.35275	-1.56133	-2.78281	-4.6685	1.215	-5.61218
orf19.3322	DUT1	dUTP pyrophosphatase; converts dUTP to dUMP and pyrophosphate; cell-cycle regulated if expressed in S. cerevisiae; upstream MluI and SCB transcription regulatory elements; induced by 17-beta-estradiol, ethynyl estradiol, macrophage	-0.0921524	-1.03476	-0.0407203	-3.88461	-4.22281	-1.43453	-2.26371	-6.87733	1.29518	-7.23191
orf19.4616	POL30	Protein described as proliferating cell nuclear antigen	0.589765	0.567052	1.12363	-3.88316	-4.16871	-1.35449	-2.27171	-6.1519	1.59933	-7.80565
orf19.5487	CDC46	Protein described as having role in control of cell division; RNA abundance regulated by tyrosol and cell density; Plc1p-regulated; transcription is repressed in response to alpha pheromone in SpiderM medium	-0.00537382	-0.550862	-0.0627221	-3.81309	-3.4555	-1.47034	-1.98098	-6.02614	-1.4564	-4.11868
orf19.403	PCL2	Cyclin homolog; reduced expression observed upon depletion of Cln3p; farnesol regulated	0.734906	0.560296	-0.536021	-3.792	-4.63179	-1.2653	-2.06637	-4.6511	1.2494	2.03207
orf19.658	GIN1	Protein involved in regulation of DNA-damage-induced filamentous growth; putative component of DNA replication checkpoint; ortholog of S. cerevisiae Mrc1p, an S-phase checkpoint protein	-0.0250129	0.00838209	-0.029554	-3.73616	-3.79643	-1.47162	-2.29248	-3.29302	1.80485	-3.56534
orf19.2796	orf19.2796	Predicted ORF in Assemblies 19, 20 and 21	-0.29674	-0.651526	-0.494053	-3.73294	-3.09045	-1.45543	-2.39445	-3.77875	0.621867	-4.05866
orf19.4255	ECM331	Putative GPI-anchored protein; caspofungin induced; Plc1p-regulated; repressed by Rim101p, Hog1p; shows colony morphology-related gene regulation by Ssn6p; increased mRNA abundance in cyr1 homozygous null mutant yeast-form cells	1.4901	0.953256	1.59517	-3.59631	-4.25097	-1.52483	-1.92601	-1.9751	2.9051	-2.29036
orf19.1061	HHT21	Putative histone H3; amphotericin B repressed; regulated by Efg1p; farnesol regulated	-0.0789637	-1.04919	#DIV/0!	-3.56578	-3.95234	-1.34793	-2.14177	-3.96215	-1.83833	-19.5487
orf19.262	SMC3	Protein likely to be essential for growth, based on an insertional mutagenesis strategy; similar to S. cerevisiae Smc3p, which is an ATPase involved in sister chromatid cohesion	-2.04645	-1.76578	-1.72657	-3.56241	-3.63804	-1.88814	-2.55625	-4.89574	-1.69472	-5.49613
orf19.3100	orf19.3100	Predicted ORF in Assemblies 19, 20 and 21; transcription is repressed in response to alpha pheromone in SpiderM medium	0.0400878	0.527648	1.1277	-3.5533	-3.62858	-1.31706	-1.95512	-2.85508	-1.0624	-5.66164
orf19.4354	orf19.4354	Predicted ORF in Assemblies 19, 20 and 21	-0.0226971	-1.16549	-0.0390274	-3.55203	-3.3477	-1.37983	-2.02618	-5.26899	-1.05814	-1.77087
orf19.3895	CHT2	Chitinase; putative N-terminal catalytic domain, GPI anchor, O-mannosylated region, signal peptide; 3 N-glycosylation motifs; downregulated in core caspofungin response; induced in yeast-form cells; Cyr1p-, Efg1p-, pH-regulated	0.0384909	-0.589747	0.0961535	-3.5226	-4.3451	-1.33611	-2.11542	-1.70311	1.76549	-0.0123638
orf19.2885	PRI2	Gene adjacent to CDC68; divergently transcribed with CDC68	1.1865	0.555101	1.17696	-3.51817	-3.46559	-1.5101	-2.24714	-3.72366	1.19085	-5.36395
orf19.3761	CDC54	Transcription is regulated by Nrg1p and Mig1p	-0.596423	-1.22218	-1.1648	-3.51433	-3.10797	-1.45223	-2.09987	-5.51871	-1.47428	-2.88773
orf19.1853	HHT2	Protein described as histone H3; farnesol regulated	-0.101238	-1.08253	1.07848	-3.50021	-4.19619	-1.62844	-2.20773	-3.89131	-1.82003	-19.3868
orf19.4945	MSH6	Protein similar to S. cerevisiae Msh6p, which is involved in mismatch repair; repressed under Cdc5p depletion	0.53762	0.515864	1.06589	-3.49887	-4.26366	-1.41875	-2.375	-2.90425	1.85901	-8.8183
orf19.3752	RAD51	Predicted ORF in Assemblies 19, 20 and 21; flucytosine induced	1.13129	0.512438	0.596625	-3.3941	-3.47878	-1.47349	-2.14502	-2.61321	1.82855	-1.36274
orf19.2611	MCM6	Protein described as part of MCM DNA replication initiation complex; RNA abundance regulated by tyrosol and cell density; transcription is repressed in response to alpha pheromone in SpiderM medium	-0.539833	-1.07187	-0.578312	-3.35078	-3.33319	-1.45055	-2.09241	-5.74395	1.28842	-4.26618
orf19.4301	orf19.4301	Predicted ORF in Assemblies 19, 20 and 21	-0.502094	-0.603247	-1.12579	-3.31868	-3.85722	-1.45099	-2.40437	-4.4231	-1.26443	-10.6487
orf19.1051	HTA2	Protein described as histone H2A; farnesol regulated	-0.360465	-0.132906	0.0164815	-3.29122	-3.82979	-1.66744	-2.10686	-3.40448	-1.78409	-6.76888
orf19.7232	orf19.7232	Predicted ORF in Assemblies 19, 20 and 21	0.564887	0.569957	0.572556	-3.27602	-3.13969	-1.36999	-2.07517	-3.17015	1.17843	-5.67126
orf19.2919	MPH1	Protein similar to S. cerevisiae Mph1p, which is a DNA helicase involved in DNA repair; induced under hydroxyurea treatment	-0.0323586	-1.19138	-0.0240562	-3.24987	-3.20997	-1.66354	-2.1106	-2.85514	1.22909	-6.20598
orf19.1522	orf19.1522	Predicted ORF in Assemblies 19, 20 and 21	-0.882466	-0.821246	-0.601784	-3.22761	-3.60906	-1.51503	-2.26279	-4.09215	-5.29971	-22.413
orf19.1747	KIP2	Protein similar to S. cerevisiae Kip2p; transcription is repressed in response to alpha pheromone in SpiderM medium	-0.647683	-0.433814	-0.212008	-3.21635	-3.62969	-1.60385	-2.29389	-3.45361	-4.55153	-14.4036
orf19.5873	POL1	Protein described as DNA directed DNA polymerase alpha; RNA abundance regulated by tyrosol and cell density	1.17435	1.09816	0.650704	-3.18178	-3.88287	-1.51216	-2.02978	-2.55839	2.13042	-4.72078
orf19.4105	orf19.4105	Predicted ORF in Assemblies 19, 20 and 21	-0.542315	-1.03832	-0.00510518	-3.16844	-2.8934	-1.46862	-2.0158	-2.93275	1.48081	-3.84228
orf19.6737	orf19.6737	Protein not essential for viability; greater mRNA abundance observed in a cyr1, ras1, or efg1 homozygous null mutant than in wild type; possibly spurious ORF (Annotation Working Group prediction)	0.575346	1.03041	0.594293	-3.15591	-3.21088	-1.37294	-2.01572	-5.77024	-1.92499	-3.04081
orf19.3048	orf19.3048	Predicted ORF in Assemblies 19, 20 and 21; transcription is repressed in response to alpha pheromone in SpiderM medium	0.0171392	-0.00362015	0.00796676	-3.11107	-3.33942	-1.35899	-1.94095	-2.36918	1.52296	-2.80965
orf19.4367	SMC1	Protein described as similar to chromosomal ATPases; RNA abundance regulated by tyrosol and cell density	1.12684	0.0258933	1.06422	-3.09131	-3.0262	-1.34425	-1.96158	-2.83651	1.63089	-3.13748
orf19.576	CTF8	Protein repressed during the mating process	-0.0375179	-0.0873838	-0.0354767	-3.0803	-3.60268	-1.46083	-2.19822	-6.8816	-1.66449	-9.00251
orf19.5518	orf19.5518	Predicted ORF in Assemblies 19, 20 and 21	-0.691759	-1.21954	-1.27964	-3.0614	-3.50148	-1.48767	-2.2251	-1.81128	2.21529	-3.8409
orf19.3623	SMC2	Protein similar to S. cerevisiae Smc2p, which is a component of the condensin complex involved in mitotic chromosome condensation; induced under hydroxyurea treatment	-0.635971	-1.13751	-0.573372	-3.03536	-2.86489	-1.42908	-2.00985	-2.45333	1.21469	-3.79692
orf19.7301	orf19.7301	Predicted ORF in Assemblies 19, 20 and 21	-0.0823188	0.260755	0.217517	-2.99973	-2.54817	-0.788194	-1.21454	-3.38034	1.25054	-3.41168
orf19.4136	YBL053	Predicted ORF in Assemblies 19, 20 and 21; not essential for viability	-0.0287441	-0.0859152	-0.552268	-2.98795	-3.43499	-1.36315	-2.13676	-3.27577	1.21139	-3.52187
orf19.4080	orf19.4080	Predicted ORF in Assemblies 19, 20 and 21; possibly spurious ORF (Annotation Working Group prediction)	0.511249	-1.10398	-0.563079	-2.97717	-2.51212	-1.48644	-2.0976	-5.30915	-1.59029	-6.89188
orf19.1052	orf19.1052	Predicted histone H2B	#DIV/0!	#DIV/0!	#DIV/0!	-2.97479	-3.44698	-1.40931	-1.96979	-3.30712	-1.71958	-6.68907
orf19.1901	orf19.1901	Predicted ORF in Assemblies 19, 20 and 21	-0.57887	-1.14592	-1.1341	-2.93822	-2.9795	-1.35432	-1.77673	-4.15271	-1.06992	-2.83277
orf19.4030	orf19.4030	Predicted ORF in Assemblies 19, 20 and 21	0.606006	1.07299	0.0507339	-2.92175	-2.80569	-1.3086	-1.95381	-2.42678	1.89136	-4.01535
orf19.1854	HHF22	Putative histone H4; regulated by Efg1p; flucytosine, fluconazole-induced; amphotericin B, caspofungin repressed; shows colony morphology-related gene regulation by Ssn6p	-1.14023	-1.09099	#DIV/0!	-2.91815	-3.4405	-1.4521	-2.00611	-3.41092	-1.41686	-9.62642
orf19.2216	orf19.2216	Predicted ORF in Assemblies 19, 20 and 21	0.518401	-0.0150631	0.72135	-2.91702	-3.30097	-1.49534	-1.93103	-2.55902	1.84133	-2.79736
orf19.663	GIN4	Kinase involved in pseudohyphal-to-hyphal switch; phosphorylates Cdc11p on S395 (regulatory); autophosphorylates; necessary for septin ring within germ tube, but not for septin band at mother cell junction; role in cytokinesis	0.566107	-0.565285	0.538236	-2.87749	-3.02007	-1.49078	-1.93358	-1.92456	3.06843	-2.38835
orf19.2365	POL2	Protein described as DNA polymerase epsilon; transcriptionally induced by interaction with macrophage; transcription is regulated by Tup1p	-0.593276	-1.20605	-0.642504	-2.87097	-3.10207	-1.41771	-2.1783	-2.89356	1.38427	-5.1972
orf19.6163	CSE4	Centromere-associated protein; essential; similar to CENP-A	-0.698918	-0.682435	-0.0174249	-2.84562	-2.70924	-1.51646	-1.95294	-3.44187	-2.91896	-6.35959
orf19.104	orf19.104	Predicted ORF in Assemblies 19, 20 and 21; possibly spurious ORF (Annotation Working Group prediction); transcription is induced in response to alpha pheromone in SpiderM medium	0.665697	-0.0909696	0.238757	-2.83876	-0.400245	1.30955	-0.365724	#DIV/0!	-1.35285	1.55617
orf19.2873	TOP2	DNA topoisomerase II; catalyzes ATP-dependent DNA relaxation and decatenation in vitro; Y842 predicted to be catalytic; functional homolog of S. cerevisiae Top2p; sensitive to amsacrine or doxorubicin; farnesol-upregulated in biofilm	0.0744195	1.11394	0.562676	-2.82789	-3.00924	-1.41973	-1.91172	-1.31893	3.34838	-3.00855
orf19.4773	AOX2	Alternative oxidase; induced by antimycin A, some oxidants; growth- and carbon-source-regulated; one of two isoforms (Aox1p and Aox2p); involved in cyanide-resistant respiratory pathway that is absent from S. cerevisiae	-1.20375	-1.30391	1.12705	-2.82678	-2.84056	-0.0154842	-2.16634	-1.08938	-2.00874	1.46534
orf19.2758	PGA38	Putative GPI-anchored protein of unknown function; repressed during cell wall regeneration	-1.54447	-1.4533	-0.663813	-2.82214	-3.2291	-1.50901	-2.08678	-9.73112	-10.1996	-46.3909
orf19.7293	MPS1	Predicted ORF in Assemblies 19, 20 and 21; essential for growth	0.559721	0.0448933	1.05344	-2.80657	-2.58316	-1.31769	-1.67227	-2.59065	0.200102	-2.27818
orf19.1351	orf19.1351	Predicted ORF in Assemblies 19, 20 and 21	-0.1162	-0.678014	-1.31614	-2.80082	-1.2908	-1.83528	-1.48083	-1.41254	1.46735	-2.18707
orf19.5188	CHS1	Chitin synthase; essential; required for primary septum synthesis in yeast-form cells and hyphae; one of multiple chitin synthases; enzymatically activated by proteolytic processing; complements defects of S. cerevisiae chs1 or chs2 mutant	0.0563348	0.0073998	1.1565	-2.78014	-3.01556	-1.29666	-1.79319	-1.2616	-1.22449	-13.38
orf19.3694	orf19.3694	Predicted ORF in Assemblies 19, 20 and 21	-0.19633	-0.674718	-1.22973	-2.77936	-2.68582	-1.49952	-1.9186	-3.93191	-1.39345	-1.91175
orf19.6342	orf19.6342	Predicted ORF in Assemblies 19, 20 and 21	0.0814846	0.574566	0.0162665	-2.77357	-2.50173	-1.26626	-1.74281	-4.06389	-1.29302	-3.16682
orf19.1841	orf19.1841	Predicted ORF in Assemblies 19, 20 and 21	-1.4035	-1.33492	-1.39146	-2.75868	-2.53546	-1.62114	-2.02794	-2.72406	-0.0437735	-3.60563
orf19.6247	orf19.6247	Predicted ORF in Assemblies 19, 20 and 21	1.24078	1.12249	0.57718	-2.75615	-2.86993	-1.25692	-1.80375	-3.91417	1.12119	-4.50178
orf19.6924	HTA1	Putative histone H2A; reduced mRNA abundance detected in homozygous fkh2 null mutant; amphotericin B repressed; farnesol regulated; RNA abundance regulated by tyrosol and cell density	1.16558	-0.0166535	0.174434	-2.74601	-2.86564	-1.34611	-1.80138	-2.80423	-1.65519	-11.3434
orf19.5316	FGR29	Protein lacking an ortholog in S. cerevisiae; transposon mutation affects filamentous growth	-0.759174	-0.750546	-0.5433	-2.73382	-2.97999	-1.31847	-1.907	-1.78125	-1.77711	-1.43316
orf19.5801	RNR21	Protein described as similar to ribonucleoside-diphosphate reductase; regulated by tyrosol and cell density; transcription is upregulated in response to treatment with ciclopirox olamine; fluconazole or flucytosine induced	1.1024	-0.0216605	-0.522253	-2.73295	-2.68135	-1.46873	-1.86814	-3.44306	1.21365	-3.89847
orf19.4867	SWE1	Functional homolog of S. cerevisiae Swe1p; mutant cells are small, rounded, and sometimes binucleate; not required for filamentous growth; transcription is repressed in response to alpha pheromone in SpiderM medium	0.516646	0.0214417	1.09621	-2.72599	-2.99589	-1.33263	-1.9483	-3.92048	-2.05763	-4.52509
orf19.3780	orf19.3780	Protein likely to be essential for growth, based on an insertional mutagenesis strategy	-0.832102	-1.26963	-1.25451	-2.72385	-2.29065	-1.39427	-2.05325	-4.55992	-2.95485	-2.9942
orf19.557	orf19.557	Predicted ORF in Assemblies 19, 20 and 21	-0.876272	0.445234	-0.121797	-2.71036	-2.90043	-1.39571	-1.83679	-7.82986	-9.3163	-23.8784
orf19.2739	orf19.2739	Predicted ORF in Assemblies 19, 20 and 21	0.547341	-0.541544	0.56638	-2.6809	-2.47557	-1.33751	-2.1156	-3.13778	0.130301	-2.82089
orf19.4664	orf19.4664	Predicted ORF in Assemblies 19, 20 and 21	-0.536204	-0.577213	-0.532926	-2.64626	-2.5607	-1.46162	-1.85669	-1.67257	3.04636	-6.13063
orf19.4068	orf19.4068	Predicted ORF in Assemblies 19, 20 and 21	-0.716096	-0.725662	-0.0410772	-2.64472	-2.76007	-1.6026	-1.96535	-2.24851	-0.270183	-4.66645
orf19.1059	HHF1	Putative histone H4; reduced mRNA in homozygous fkh2 null mutant; regulated by Efg1p; fluconazole induced; amphotericin B repressed; farnesol regulated; shows colony morphology-related gene regulation by Ssn6p	-1.17725	-1.11338	#DIV/0!	-2.63417	-3.13589	-1.4315	-1.88668	-2.96234	-1.29427	-6.78806
orf19.1446	CLB2	B-type mitotic cyclin	-0.0117096	-0.132902	0.050452	-2.60425	-2.64773	-1.48069	-1.8244	-1.58318	-1.21744	-1.67127
orf19.4910	FGR41	Putative GPI-anchored protein; transposon mutation affects filamentous growth; possibly spurious ORF	-1.643	-1.49396	-0.730629	-2.59817	-3.02101	-1.48579	-1.99846	-8.30374	-9.95305	-42.0637
orf19.4169	orf19.4169	Predicted ORF in Assemblies 19, 20 and 21; possibly spurious ORF (Annotation Working Group prediction)	-0.134576	-0.736018	-0.630258	-2.58164	-2.69401	-1.38877	-1.85129	-4.28272	-2.12111	-5.06781
orf19.6970	orf19.6970	Protein not essential for viability; possibly spurious ORF	-2.76941	-2.20679	-2.33417	-2.57563	-2.63355	-2.19891	-2.52071	-3.91736	-3.77773	-3.57717
orf19.3549	CDC21	Predicted ORF in Assemblies 19, 20 and 21; flucytosine induced	0.582095	0.548606	0.529168	-2.55695	-2.43548	-1.4992	-1.87941	-1.89097	2.88707	-6.1906
orf19.1334	orf19.1334	Predicted ORF in Assemblies 19, 20 and 21; possibly spurious ORF (Annotation Working Group prediction); transcription is repressed in response to alpha pheromone in SpiderM medium	-0.0543545	-0.0668891	0.566288	-2.55458	-2.94811	-1.24612	-1.95243	-4.2327	-4.77997	-14.8583
orf19.6124	ACE2	Putative transcription factor involved in regulation of morphogenesis; required for wild-type cell separation, adherence, biofilm formation, and virulence in mouse; mutant is hyperfilamentous; similar to S. cerevisiae Ace2p and Swi5p	-0.153633	-0.268586	0.00458978	-2.54687	-2.89396	-1.42869	-1.84352	-3.66852	-4.26787	-7.29138
orf19.1735	orf19.1735	Predicted ORF in Assemblies 19, 20 and 21	-1.81998	-1.24096	-1.64324	-2.51853	-1.22603	-1.53661	-1.8401	-3.79944	-5.84602	-5.13841
orf19.1115	GUK1	Putative guanylate kinase; identified in extracts from biofilm and planktonic cells	0.475706	0.415107	0.908764	-2.51823	-2.38121	-1.2699	-1.61422	1.13888	1.75684	-2.37846
orf19.5664	HOF1	Protein not essential for viability; similar to S. cerevisiae Hof1p, which is a protein localized to the bud neck and required for cytokinesis	0.0338502	-0.61423	0.100992	-2.51709	-2.86854	-1.22587	-1.69005	-2.4181	-1.61627	-15.7806
orf19.3715	ASF1	Protein likely to be essential for growth, based on an insertional mutagenesis strategy; similar to S. cerevisiae Asf1p, which is a chromatin assembly complex component	0.546695	0.533405	0.0392872	-2.49337	-2.28646	-1.19968	-1.89477	-3.88968	-1.18035	-3.98456
orf19.175	orf19.175	Predicted ORF in Assemblies 19, 20 and 21	-0.689751	-1.16158	-0.0544303	-2.48587	-2.126	-1.42556	-1.84804	-1.87865	1.13201	-3.35965
orf19.1302	orf19.1302	Predicted ORF in Assemblies 19, 20 and 21	-3.0865	-2.41186	-2.59947	-2.47062	-2.36615	-2.56852	-2.68996	-2.96452	-3.10837	-3.4129
orf19.7190	orf19.7190	Predicted ORF in Assemblies 19, 20 and 21	1.35694	0.657376	0.0855821	-2.46638	-2.55976	-1.13824	-2.05579	-6.79005	-1.59295	-3.09018
orf19.4342	orf19.4342	Predicted ORF in Assemblies 19, 20 and 21	-1.13814	-1.16364	0.0223122	-2.44052	-3.20691	-1.15423	-1.74013	0.148914	2.23483	-0.0643887
orf19.7218	RBE1	Putative cell wall protein; transcription is negatively regulated by Rim101p, Efg1p, Ssn6p; alkaline downregulated; predicted signal sequence, O-glycosylation; no GPI anchor predicted	-0.261437	-1.2428	0.0112919	-2.4254	-2.6875	-1.30883	-1.53603	-24.3416	-11.3294	-16.6543
orf19.7065	orf19.7065	Predicted ORF in Assemblies 19, 20 and 21	-0.567284	-0.0207939	-0.533774	-2.41973	-2.19748	-1.33197	-1.64061	-1.40883	1.70275	-2.94328
orf19.926	orf19.926	Predicted ORF in Assemblies 19, 20 and 21	-0.686898	-1.1952	-1.18225	-2.40609	-2.36908	-1.59233	-1.75119	-1.71297	-1.30458	-3.62267
orf19.2267	RFA2	Protein described as DNA replication factor A; RNA abundance regulated by tyrosol and cell density	-0.0259388	-0.018598	-0.0159929	-2.40352	-2.52971	-1.42034	-1.76852	-2.86862	1.34414	-3.78876
orf19.2706	CRH11	Putative ortholog of S. cerevisiae Crh1p; predicted glycosyl hydrolase domain; similar to Csf4p, to antigenic Aspergillus fumigatus Aspf9; predicted Kex2p substrate; putative GPI-anchor; localizes to cell wall, caspofungin-induced	1.33416	1.18273	1.09884	-2.39956	-2.16792	-1.24713	-1.55754	17.5704	55.1156	1.26353
orf19.699	orf19.699	Predicted ORF in Assemblies 19, 20 and 21	-1.389	-0.829811	-0.52156	-2.36001	-2.12494	-1.36738	-2.02957	-2.39486	-9.50208	-0.900974
orf19.5267	orf19.5267	Putative cell wall protein; downregulated in core caspofungin response; transcription is repressed in response to alpha pheromone in SpiderM medium; transcription repressed in ace2 null mutant	-1.11668	-0.954541	-0.802096	-2.35225	-2.6289	-1.4455	-1.80799	-16.5315	-12.3507	-32.3969
orf19.836	orf19.836	Protein likely to be essential for growth, based on an insertional mutagenesis strategy	-0.0769332	0.520045	0.501083	-2.32502	-2.32866	-1.53913	-1.84521	-1.64272	-0.105026	-3.64451
orf19.1868	RNR22	Protein described as ribonucleoside diphosphate reductase; shows colony morphology-related gene regulation by Ssn6p; RNA abundance regulated by tyrosol and cell density	-0.062473	-0.614746	-0.00967989	-2.32397	-2.41694	-1.17855	-1.60176	-5.02792	-2.2199	-3.4856
orf19.1309	orf19.1309	Predicted ORF in Assemblies 19, 20 and 21; possibly spurious ORF (Annotation Working Group prediction)	-0.556404	-0.00980986	-0.0287549	-2.32091	-2.35279	-1.19448	-1.8552	-3.50709	1.11611	-3.76896
orf19.4837	orf19.4837	Predicted ORF in Assemblies 19, 20 and 21	-1.13608	-0.0174199	0.545492	-2.31511	-2.38268	-1.25833	-1.64836	-1.37285	1.22146	-3.12866
orf19.6910	orf19.6910	Predicted ORF in Assemblies 19, 20 and 21	-0.604721	-1.17875	-0.658463	-2.28663	-2.53018	-1.52015	-2.05117	-3.47861	-1.20748	-4.01585
orf19.6010	CDC5	Polo-like kinase; probably essential for viability; depletion causes defects in spindle elongation and causes Cdc35p-dependent filamentation	-0.620828	-0.112758	0.545875	-2.28178	-2.40704	-1.38931	-1.54412	-3.09976	-2.89082	-10.5679
orf19.6294	orf19.6294	Predicted ORF in Assemblies 19, 20 and 21	-1.21196	-0.616006	-1.18199	-2.27061	-2.13443	-1.16247	-1.75519	-1.43884	2.18262	-2.09152
orf19.3239	orf19.3239	Predicted ORF in Assemblies 19, 20 and 21	1.20688	1.13313	1.15657	-2.25436	-1.95589	-1.26517	-1.69201	-1.75051	1.48158	-2.0533
orf19.1606	orf19.1606	Predicted ORF in Assemblies 19, 20 and 21; Plc1p-regulated	-0.6207	-0.75772	-1.4237	-2.24446	-2.40564	-1.29609	-2.0865	-5.51287	0.503418	-3.17959
orf19.3893	SCW11	Cell wall protein; transcription is decreased in mutant lacking ACE2; downregulated in core caspofungin response; transcriptionally regulated by iron; expression greater in high iron	-0.104853	-0.767671	0.0636749	-2.23656	-2.68465	-1.30596	-1.74097	-12.0409	-9.68675	-46.3761
orf19.2512	orf19.2512	Predicted ORF in Assemblies 19, 20 and 21; possibly spurious ORF (Annotation Working Group prediction)	-0.00815628	-0.128708	1.20267	-2.2359	-3.2045	-1.3192	-1.70037	-4.74613	-5.45616	-11.9182
orf19.1720	orf19.1720	Predicted ORF in Assemblies 19, 20 and 21	-0.108981	-1.12054	-0.598954	-2.22969	-2.00945	-1.42141	-1.75917	-3.29163	-1.32845	-2.12828
orf19.2657	orf19.2657	Predicted ORF in Assemblies 19, 20 and 21	0.570294	0.683877	0.564383	-2.20553	-2.33575	-1.14029	-1.59276	-2.63493	1.47955	-2.34505
orf19.2238	LTE1	Protein similar to S. cerevisiae Lte1p; transcription is repressed in response to alpha pheromone in SpiderM medium	-0.0314794	-0.206128	0.613935	-2.20462	-2.11135	-1.69235	-1.61845	-1.51155	1.23893	-3.06419
orf19.5137.1	HHO1	Protein described at histone H1; farnesol regulated	0.599061	-0.619118	1.15094	-2.20386	-2.63953	-1.39565	-1.70576	-2.62347	-1.62512	-8.0008
orf19.5057	orf19.5057	Predicted ORF in Assemblies 19, 20 and 21	-0.0051028	-0.0684709	-0.123778	-2.19714	-1.79164	-1.25195	-1.95346	-1.96207	1.60533	-2.4918
orf19.4435	orf19.4435	Predicted ORF in Assemblies 19, 20 and 21	1.12883	0.542752	1.11657	-2.19684	-1.82757	-1.44709	-1.6956	2.52101	9.04425	2.79417
orf19.1622	orf19.1622	Predicted ORF in Assemblies 19, 20 and 21	-0.597495	-0.00318157	-0.00104367	-2.18062	-2.12089	-1.24408	-1.57763	-1.78354	1.0437	-4.00151
orf19.1825	orf19.1825	Protein not essential for viability; filament induced; regulated by Nrg1p, Rfg1p, Tup1p	0.77363	0.056085	0.690837	-2.17298	-2.28978	-1.23653	-1.69716	-2.38665	1.46717	-2.4749
orf19.3793	orf19.3793	Predicted ORF in Assemblies 19, 20 and 21; regulated by Nrg1p; greater mRNA abundance observed in a cyr1 or ras1 homozygous null mutant than in wild type; possibly spurious ORF (Annotation Working Group prediction)	-1.70858	-1.70672	-1.39579	-2.16943	-2.46331	-1.3091	-1.80594	-7.58488	-7.1715	-5.12713
orf19.5137	orf19.5137	Predicted ORF in Assemblies 19, 20 and 21; possibly spurious ORF (Annotation Working Group prediction)	0.696789	-0.0693371	1.2305	-2.16755	-2.63223	-1.35942	-2.06874	-2.75184	-1.93591	-14.5618
orf19.6307	orf19.6307	Predicted ORF in Assemblies 19, 20 and 21; possibly spurious ORF (Annotation Working Group prediction)	-0.870231	-1.52614	-0.703735	-2.16628	-2.16285	-0.155435	-1.66641	-0.483374	-2.23303	-1.58447
orf19.3494	CTF5	Protein induced during the mating process; transcription is repressed in response to alpha pheromone in SpiderM medium	-0.587115	-0.172678	0.550427	-2.16578	-2.29771	-1.77419	-1.84085	-2.79155	-0.18639	-6.22921
orf19.7452	orf19.7452	Predicted ORF in Assemblies 19, 20 and 21	-1.33907	-1.17592	-1.22997	-2.14521	-2.01703	-1.57618	-1.74245	-1.873	1.74412	-1.4332
orf19.6807	orf19.6807	Predicted ORF in Assemblies 19, 20 and 21	1.18971	1.16062	-0.926749	-2.14242	#DIV/0!	0.260089	-0.072017	-1.52309	#DIV/0!	-1.49071
orf19.3571	orf19.3571	Predicted ORF in Assemblies 19, 20 and 21	-2.1737	-1.8901	-1.79278	-2.14193	-1.90606	-1.71925	-2.20578	-2.5737	-2.4876	-2.40102
orf19.1999	orf19.1999	Predicted ORF in Assemblies 19, 20 and 21	-0.140285	-0.743314	-0.0563676	-2.12898	-2.22501	-1.54786	-1.63758	-0.160451	3.0753	-5.37763
orf19.4545	SWI4	Predicted ORF in Assemblies 19, 20 and 21	-1.14339	-1.11622	-0.574149	-2.12819	-2.19224	-1.43342	-1.60749	-3.00011	1.06438	-2.15342
orf19.1611	orf19.1611	Predicted ORF in Assemblies 19, 20 and 21	-1.33061	-0.161474	-0.694077	-2.1183	-1.5517	0.0205155	-1.45952	-2.11225	-1.28343	-5.45486
orf19.6277	orf19.6277	Predicted ORF in Assemblies 19, 20 and 21	-1.5782	-1.36139	-1.61782	-2.11798	-2.88947	-1.65762	-1.74868	-5.74419	-0.829853	2.14306
orf19.4390	orf19.4390	Predicted ORF in Assemblies 19, 20 and 21; transcription is repressed in response to alpha pheromone in SpiderM medium	0.025088	-0.592037	-0.0433864	-2.11544	-1.93205	-1.25074	-1.70692	-4.09965	1.1652	-2.84422
orf19.6925	HTB1	Putative histone H2B; induced upon adherence to polystyrene; amphotericin B or caspofungin repressed; flucytosine or fluconazole induced; regulated by Efg1p	0.356427	0.2685	1.17416	-2.1111	-2.34912	-1.35363	-1.58765	-2.25018	-1.50537	-4.67768
orf19.2093	RFA1	Protein described as DNA replication factor A; RNA abundance regulated by tyrosol and cell density	0.184131	0.399446	0.406096	-2.11032	-2.11579	-1.3091	-1.62934	-2.54827	1.98178	-2.80018
orf19.2227	orf19.2227	Predicted ORF in Assemblies 19, 20 and 21; repressed by nitric oxide	0.0524866	-0.00301256	0.671238	-2.10037	-1.92121	-1.20692	-1.45323	-3.80487	-3.51889	-6.79004
orf19.6027	orf19.6027	Predicted ORF in Assemblies 19, 20 and 21	-1.0658	-0.10323	-1.08769	-2.09392	-1.61623	-1.33853	-1.67714	-3.67782	-2.72468	-2.02454
orf19.6501	orf19.6501	Predicted ORF in Assemblies 19, 20 and 21	#DIV/0!	0.815288	#DIV/0!	-2.07193	-1.28065	1.24379	#DIV/0!	-0.0737772	-1.81882	2.96083
orf19.6936	RAD53	Protein involved in regulation of DNA-damage-induced filamentous growth; putative component of cell cycle checkpoint; ortholog of S. cerevisiae Rad53p, protein kinase required for cell-cycle arrest in response to DNA damage	0.55252	0.573013	1.13161	-2.06273	-1.99819	-1.16203	-1.5601	-3.17782	-1.28357	-2.73782
orf19.1192	DNA2	Protein similar to S. cerevisiae Dna2p, which is a DNA replication factor involved in DNA repair; induced under hydroxyurea treatment	0.011105	0.0249928	-0.00855877	-2.03943	-1.97711	-1.25912	-1.50626	-1.95613	1.59001	-2.34816
orf19.494	orf19.494	Predicted ORF in Assemblies 19, 20 and 21	-1.67794	-1.30772	-1.52238	-2.03249	-1.64897	-1.18987	-1.39459	-3.80942	-3.88847	-3.76338
orf19.7083	orf19.7083	Predicted ORF in Assemblies 19, 20 and 21	0.577432	-0.533054	0.494843	-2.0245	-1.98918	-0.132847	-1.45858	-3.37343	-1.55204	-3.86768
orf19.50	orf19.50	Predicted ORF in Assemblies 19, 20 and 21	-2.29826	-1.84225	-1.96768	-2.02256	-1.89383	-2.01017	-1.38429	-2.51611	-1.59086	-2.69266
orf19.4725	orf19.4725	Predicted ORF in Assemblies 19, 20 and 21	-1.18064	-0.545124	-1.06702	-2.01871	-1.85718	-1.21296	-1.3893	-3.44169	1.11039	-1.7181
orf19.2478	orf19.2478	Predicted ORF in Assemblies 19, 20 and 21	0.631579	0.631707	1.10697	-2.01787	-1.0948	-1.30735	-1.64907	-1.56044	1.14623	-2.64258
orf19.29	orf19.29	Predicted ORF in Assemblies 19, 20 and 21	-0.128393	-1.08407	-1.13526	-2.01785	-1.95171	-0.0525724	-1.66238	1.20041	1.92027	-1.863
orf19.1286	orf19.1286	Predicted ORF in Assemblies 19, 20 and 21	1.14378	0.629984	-0.670218	-2.01429	-1.62773	1.13179	-1.46938	0.0634686	-1.41818	-1.07227
orf19.6008	orf19.6008	Predicted ORF in Assemblies 19, 20 and 21; transcription is repressed in response to alpha pheromone in SpiderM medium	-0.926838	-0.821226	-0.725598	-2.00874	-2.23153	-1.32061	-1.79266	-2.72018	-2.55094	-22.7043
orf19.1137	orf19.1137	Predicted ORF in Assemblies 19, 20 and 21	0.015669	-1.13092	-0.0970823	-1.99502	-1.89963	-1.47947	-1.69478	-3.16493	-1.84692	-2.96418
orf19.7035	orf19.7035	Predicted ORF in Assemblies 19, 20 and 21	-0.625656	-1.54759	-1.39193	-1.97387	-1.94497	-1.76696	-1.93999	-2.15342	-0.219151	-3.57845
orf19.3093	MSH2	Protein described as DNA mismatch repair factor; transcription is regulated by Nrg1p; flucytosine repressed; RNA abundance regulated by tyrosol and cell density	1.17097	0.571902	1.06474	-1.96431	-2.03956	-1.25781	-1.67802	-1.89347	1.94755	-4.51621
orf19.3629	DSE1	Predicted cell wall protein; transcription is decreased in mutant lacking ACE2	-1.59956	-1.51973	-1.32767	-1.96359	-1.70774	-1.43171	-1.67117	-5.17016	-7.25003	-18.8783
orf19.3264	CCE1	Putative Holliday junction resolving enzyme; similar to S. cerevisiae Cce1p	-0.0223284	0.412691	-0.550133	-1.96265	-1.84877	-1.51174	-1.7364	-2.47131	-1.29216	-4.08286
orf19.7594	orf19.7594	Predicted ORF in Assemblies 19, 20 and 21	-0.674016	-0.710799	-0.679804	-1.95208	-1.89165	-1.27721	-1.67837	-2.37245	-1.44048	-2.33519
orf19.3429	FGR47	Protein lacking an ortholog in S. cerevisiae; transposon mutation affects filamentous growth	-2.23648	-1.82702	-2.03588	-1.94823	-1.78466	-1.96564	-1.91608	-2.24337	-2.17916	-2.61066
orf19.1223	orf19.1223	Predicted ORF in Assemblies 19, 20 and 21	-0.708417	-0.688177	-0.0894925	-1.94678	-1.61637	-1.42921	-1.64114	2.6569	2.67956	1.41614
orf19.2000	orf19.2000	Predicted ORF in Assemblies 19, 20 and 21	-0.527818	-0.0327307	-0.557111	-1.92961	-1.5254	-1.33603	-1.44579	-1.60801	-1.52676	-2.99931
orf19.7042	orf19.7042	Increased transcription is observed upon benomyl treatment or in an azole-resistant strain that overexpresses MDR1; induced by nitric oxide	-1.1937	-1.18825	0.586995	-1.92953	-1.95156	-1.34012	-1.77303	-2.64985	1.05122	-2.48378
orf19.230	orf19.230	Predicted ORF in Assemblies 19, 20 and 21	-1.59405	-1.44458	-1.26097	-1.92623	-1.75389	-1.70663	-1.66736	-1.83806	-2.64905	-2.41191
orf19.6343	orf19.6343	Predicted ORF in Assemblies 19, 20 and 21	1.18636	0.542406	0.67137	-1.91975	-1.6541	-1.11813	-1.43668	-1.34856	-1.2304	-2.35958
orf19.5818	SUR2	Protein described as similar to ceramide hydroxylase; predicted enzyme of sphingolipid biosynthesis; upregulated in biofilm; regulated by Tsa1p, Tsa1Bp under H2O2 stress conditions	-1.08103	-0.526944	1.08068	-1.90945	-1.79694	-0.0863448	-1.33315	-1.22096	-1.23274	-2.33139
orf19.547	orf19.547	Predicted ORF in Assemblies 19, 20 and 21	0.535762	1.05137	0.580554	-1.90454	-1.67926	-1.09393	-1.37959	-2.16854	1.21952	-2.6798
orf19.1941	orf19.1941	Predicted ORF in Assemblies 19, 20 and 21	-0.798287	-1.13242	-0.0529668	-1.90089	-1.81337	-1.22836	-1.65794	-2.204	-1.11376	-3.32173
orf19.4192	CDC14	Protein involved in exit from mitosis and morphogenesis; ortholog of S. cerevisiae Cdc14p, which is a dual-specificity phosphatase and cell-cycle regulator; suppresses S. cerevisiae cdc15-lyt1, dbf2-2, and (partially) tem1 mutant phenotypes	1.1764	1.12316	1.18217	-1.89886	-1.70787	-1.242	-1.35478	1.31853	2.11896	-3.69307
orf19.7186	CLB4	B-type mitotic cyclin; nonessential; negative regulator of pseudohyphal growth; not required for mitotic exit or cytokinesis; increased mRNA abundance detected in homozygous fkh2 null mutant; farnesol-upregulated in biofilm	0.584864	-0.0375539	0.577473	-1.889	-1.93804	-1.3218	-1.43695	-1.28265	1.37735	-1.91368
orf19.3148	orf19.3148	Predicted ORF in Assemblies 19, 20 and 21	-0.0845262	-0.813023	-0.598694	-1.88893	-1.84861	-1.65837	-1.58433	1.84469	3.85901	2.15467
orf19.5578	orf19.5578	Predicted ORF in Assemblies 19, 20 and 21	0.654709	0.0488645	0.613255	-1.88366	-1.5635	-1.1069	-1.49802	-1.71253	1.37646	-3.74236
orf19.9	orf19.9	Predicted ORF in Assemblies 19, 20 and 21; possibly spurious ORF (Annotation Working Group prediction)	-0.0134742	-0.187081	1.12951	-1.88245	-2.16725	-1.3937	-1.5367	-2.30533	-0.29905	-4.16296
orf19.3674	orf19.3674	Predicted ORF in Assemblies 19, 20 and 21	-0.0793475	-0.160228	-1.2007	-1.87588	-1.49377	-0.105526	-1.80935	-3.00597	-10.3443	-1.67747
orf19.3216	orf19.3216	Similar to Rab GTPase activators	0.22601	-0.298545	-0.00965789	-1.87364	-2.79614	-1.62107	-1.73414	-2.6705	0.679157	-2.09498
orf19.7658	RFC4	Predicted ORF in Assemblies 19, 20 and 21; flucytosine induced	1.09338	-0.485787	1.07032	-1.87292	-1.71788	-1.10767	-1.35395	-2.23252	-1.30942	-2.99426
orf19.3468	ALG11	Protein with similarity to mannosyltransferases	0.199113	-0.908616	-0.0707717	-1.87286	-1.79788	-1.22253	-1.57135	-3.05788	-1.89618	-1.49594
orf19.2417	orf19.2417	Predicted ORF in Assemblies 19, 20 and 21; similar to S. cerevisiae Yol034wp, which is involved in DNA repair; transposon mutation affects filamentous growth	-0.535608	0.470001	-0.0974045	-1.86999	-1.98154	-1.18775	-1.45146	-2.25842	1.33654	-2.7966
orf19.2356	CRZ2	Putative transcription factor; zinc finger; similar to S. cerevisiae Crz1p; homozygous crz1, not crz2, null mutation suppresses fluconazole resistance of homozygous cka2 null (defective in CK2 kinase ); Rim101p-downregulated at pH 8	-0.633209	-1.25747	-0.54589	-1.86817	-1.6733	-1.22765	-1.67355	-8.06585	-10.7884	-2.19521
orf19.6586	orf19.6586	Predicted ORF in Assemblies 19, 20 and 21; increased transcription is observed upon benomyl treatment or in an azole-resistant strain that overexpresses MDR1; shows colony morphology-related gene regulation by Ssn6p; induced by nitric oxide, 17-beta-estradiol, ethynyl estradiol; macrophage-downregulated gene	-1.4844	-1.4277	-0.58774	-1.86476	-1.72335	-1.1761	-1.74296	-4.20637	-10.1057	-3.38693
orf19.7553	orf19.7553	Predicted ORF in Assemblies 19, 20 and 21	-1.4794	-1.24546	-1.27555	-1.85695	-1.80549	-1.30139	-1.50708	-2.01293	-1.38436	-1.9925
orf19.3296	orf19.3296	Predicted ORF in Assemblies 19, 20 and 21	0.525533	0.00229889	-0.543879	-1.8558	-1.90235	-1.13144	-0.985169	-1.68241	1.49178	-1.14762
orf19.3803	MNN22	Protein described as similar to Golgi alpha-1,2-mannosyltransferase; regulated by Tsa1p, Tsa1Bp in minimal media at 37 deg; Hog1p-induced; induced by nitric oxide; downregulated in core stress response	-1.0261	-0.877292	-1.54198	-1.85423	-2.8501	-1.32651	-1.67245	-2.17601	1.52052	1.18245
orf19.2465	orf19.2465	Predicted ORF in Assemblies 19, 20 and 21	-0.0432832	0.533941	-0.534685	-1.85311	-1.62979	-0.0395739	-1.38816	-1.60994	1.28399	-1.51396
orf19.2475	PGA26	Putative GPI-anchored protein of unknown function; transcriptionally regulated by iron; expression greater in high iron; induced during cell wall regeneration; possibly spurious ORF	-0.736125	-0.856462	-0.803802	-1.84567	-1.33845	-1.36414	-1.22912	-2.32788	-1.02377	-7.8648
orf19.6568	orf19.6568	Predicted ORF in Assemblies 19, 20 and 21	1.12185	-0.000271714	1.11271	-1.84317	-1.78479	-1.37269	-1.55851	-1.53611	1.71776	-1.85768
orf19.158	orf19.158	Predicted ORF in Assemblies 19, 20 and 21	-0.582213	-0.715875	-1.13475	-1.84167	-1.51876	-1.1607	-1.60941	-2.04315	-2.73907	-3.22088
orf19.5079	CDR4	Putative transporter of ATP-binding cassette (ABC) superfamily; fluconazole, Sfu1p, Hog1p, core stress response induced; caspofungin repressed; fluconazole resistance is not affected by mutation or correlated with expression	-1.56654	-1.57007	-1.55715	-1.83898	-1.74811	-1.22798	-1.40113	-4.39218	-6.88685	-4.19093
orf19.915	orf19.915	Predicted ORF in Assemblies 19, 20 and 21	-0.637077	-0.788458	-1.11232	-1.83565	-1.98711	-1.16288	-1.63321	-2.56923	-2.27493	-6.5027
orf19.6078.1	orf19.6078.1	ORF Predicted by Annotation Working Group	0.575395	-0.0335848	-0.00135352	-1.83524	-1.86582	-1.35116	-1.6481	-2.84004	-0.0323097	-2.41478
orf19.2673	orf19.2673	Predicted ORF in Assemblies 19, 20 and 21	1.12939	-0.540413	0.527757	-1.82253	-1.70281	-1.26448	-1.56083	-2.17578	1.02494	-2.58035
orf19.3581	orf19.3581	Predicted ORF in Assemblies 19, 20 and 21	0.633744	0.561768	0.625181	-1.81696	-1.73448	-1.15649	-1.43682	-1.17543	2.58359	1.66397
orf19.5182	POL3	Large subunit of DNA polymerase III; partially complements defects of an S. cerevisiae cdc2 mutant; no large periodic fluctuation observed in mRNA abundance during cell cycle	0.624024	1.04862	0.574115	-1.8149	-1.93503	-1.15707	-1.50237	-2.01256	1.60258	-2.57254
orf19.1363	orf19.1363	Predicted ORF in Assemblies 19, 20 and 21; Plc1p-regulated	-0.0809888	-0.505949	-0.555412	-1.81301	-0.805354	-1.14456	-1.31417	1.50068	-1.24858	-1.70249
orf19.4675	orf19.4675	Predicted ORF in Assemblies 19, 20 and 21	-0.557746	-0.546804	0.549417	-1.80906	-1.89073	-1.26858	-1.32645	-1.39176	1.47461	-2.03976
orf19.6843	orf19.6843	Predicted ORF in Assemblies 19, 20 and 21	-0.0354478	0.0119379	0.54558	-1.80546	-1.68639	-1.12773	-1.34452	-1.67761	1.76378	-2.58677
orf19.4066	orf19.4066	Predicted ORF in Assemblies 19, 20 and 21; Hog1p-downregulated	-1.67854	-1.67075	-1.37988	-1.78953	-1.76776	-1.44628	-1.78201	-1.15842	-1.19286	-3.12418
orf19.4830	orf19.4830	Predicted ORF in Assemblies 19, 20 and 21	0.567437	1.08053	1.13517	-1.78927	-1.9104	-1.23359	-1.51766	-1.74573	2.53558	-3.57503
orf19.122	CDC20	Protein similar to S. cerevisiae Cdc20p, which is a cell-cycle regulated activator of the anaphase promoting complex; induced under Cdc5p depletion	0.67489	-0.0404509	0.623739	-1.78403	-1.79833	-1.21594	-1.50282	-0.0509299	-1.08999	-4.40105
orf19.1434	orf19.1434	Predicted ORF in Assemblies 19, 20 and 21	-0.67872	-0.584574	-0.0431217	-1.78388	-1.72718	-1.13263	-1.47349	-2.39741	-1.11445	-3.03492
orf19.6972	SMI1B	Protein of unknown function; transcription is negatively regulated by Rim101p	0.0448444	-0.0789545	0.546461	-1.78377	-1.68227	-1.45881	-1.58368	-1.91205	-0.254734	0.0470219
orf19.6316.4	orf19.6316.4	ORF Predicted by Annotation Working Group	-1.46291	-1.32215	-1.15556	-1.77957	-1.43058	-0.0196326	-1.35444	-2.1659	-2.37519	-2.88346
orf19.3678	orf19.3678	Protein not essential for viability	-1.95558	-1.40786	-1.48108	-1.77682	-1.84298	-1.26216	-1.63267	-3.36515	-4.25126	-3.14806
orf19.6579	orf19.6579	Predicted ORF in Assemblies 19, 20 and 21	0.630855	-0.574745	0.517506	-1.77648	-1.8669	-1.29079	-1.60471	-1.04573	2.29917	-3.18141
orf19.5367	RDH54	Protein described as having role in DNA recombination, repair; transcriptionally induced by interaction with macrophage	0.493547	0.530802	0.551589	-1.77234	-1.75454	-1.16171	-1.36114	-1.53319	1.30416	-2.98988
orf19.1090	orf19.1090	Predicted ORF in Assemblies 19, 20 and 21; possibly spurious ORF (Annotation Working Group prediction)	-0.771708	0.553529	-1.04487	-1.769	-1.80958	-0.426037	-1.06448	-4.22727	-7.56642	-3.66416
orf19.1960	CLN3	G1 cyclin; depletion causes abolished budding and hyphal growth defects; likely to be essential; farnesol regulated, upregulated in biofilm; functional in S. cerevisiae; similar to S. cerevisiae Cln3p, which is a G1-specific cyclin	-1.32488	-1.36814	-0.705626	-1.76669	-2.0354	-1.17326	-1.46758	-1.49168	1.47745	-1.51236
orf19.2274	orf19.2274	Predicted ORF in Assemblies 19, 20 and 21; possibly spurious ORF (Annotation Working Group prediction)	-1.08861	-0.586303	0.481809	-1.76204	-0.307805	-0.0365353	-1.12252	-0.458138	2.10719	-1.21822
orf19.6315	orf19.6315	Predicted ORF in Assemblies 19, 20 and 21; possibly spurious ORF (Annotation Working Group prediction)	-0.0705247	-0.0999935	-0.602807	-1.75529	-1.36129	-1.32886	-1.59321	6.70335	6.90863	-1.61304
orf19.712	KIP1	Non-essential kinesin from the bipolar	0.014187	-0.572383	0.587596	-1.7516	-0.72801	-1.26298	-0.849674	-0.0585676	1.4028	-0.436346
orf19.3682	CWH8	Putative dolichyl pyrophosphate	-0.973198	-1.49245	-0.657384	-1.75034	-1.91466	-1.19956	-1.54216	-4.68092	-4.12212	-2.02618
orf19.4623.3	NHP6A	Protein described as nonhistone chromatin component; RNA abundance regulated by tyrosol and cell density; amphotericin B, caspofungin repressed; intron in 5'-UTR	-0.0108089	0.32276	#DIV/0!	-1.74783	-1.78939	-1.29084	-1.46972	-4.349	-2.44027	-3.01925
orf19.3668	HGT2	Putative glucose transporter of the major facilitator superfamily; the C. albicans glucose transporter family comprises 20 members; 12 probable membrane-spanning segments; expressed in rich medium with 2% glucose	-1.0671	-1.23331	-1.2298	-1.74779	-2.02039	-1.37267	-1.55036	2.24321	-10.0423	1.85215
orf19.610	EFG1	Transcriptional repressor; required for white-phase cell type; hyphal growth, metabolism, cell-wall gene regulator; roles in adhesion, virulence; Cph1p and Efg1p have role in host cytokine response; bHLH; binds E-box; T206 phosphorylated	-1.02798	-0.928956	-0.684919	-1.74708	-1.8237	-0.832227	-1.56873	-1.80019	-1.91319	-2.3548
orf19.7100	orf19.7100	Predicted ORF in Assemblies 19, 20 and 21; possibly transcriptionally regulated upon hyphal formation	1.32574	1.19026	1.23619	-1.74462	-1.67744	-1.21353	-1.35179	0.0217996	2.40916	-2.13103
orf19.4698	orf19.4698	Predicted ORF in Assemblies 19, 20 and 21	-0.0154701	-1.20825	1.12344	-1.74156	-1.64531	-1.23229	-1.72641	-2.97975	-3.29556	-3.3769
orf19.6930	SOL1	Cell cycle regulator; partial functional homolog of S. cerevisiae Sic1p; protein degradation regulated by SCF	-1.40425	-1.26815	-1.35731	-1.73919	-1.49357	-1.27919	-1.47076	-2.35056	-1.33421	-2.72003
orf19.7494	orf19.7494	Predicted ORF in Assemblies 19, 20 and 21	1.19295	0.0158138	1.22663	-1.73725	-1.72459	-1.20907	-1.41807	-1.41916	1.48046	-2.94872
orf19.2519	orf19.2519	Predicted ORF in Assemblies 19, 20 and 21	-0.621446	-0.629821	0.530393	-1.73644	-1.61626	-1.19415	-1.32581	-1.49524	1.07091	-1.76296
orf19.8	orf19.8	Predicted ORF in Assemblies 19, 20 and 21; possibly spurious ORF (Annotation Working Group prediction)	-1.1162	-0.651434	-0.604024	-1.73506	-1.56444	-1.16976	-1.37812	-1.65557	-1.31849	-1.23329
orf19.7377	orf19.7377	Predicted ORF in Assemblies 19, 20 and 21	0.540976	-0.557089	0.648281	-1.7316	-1.78936	-1.26456	-1.51046	-0.0887373	1.23656	-1.63089
orf19.3550	orf19.3550	Predicted ORF in Assemblies 19, 20 and 21	0.0227895	-0.0342553	0.0364846	-1.72337	-1.49639	-1.25924	-1.29734	1.06481	1.45126	-3.74584
orf19.7193	orf19.7193	Predicted ORF in Assemblies 19, 20 and 21	-2.0649	-0.758115	-1.58329	-1.72049	-1.53447	-1.09165	-0.781178	-1.75715	-0.0179905	-1.42435
orf19.5004	RAD54	Protein similar to S. cerevisiae Rad54p, which is a DNA-dependent ATPase involved in DNA repair; induced under hydroxyurea treatment	0.622034	0.517764	1.12358	-1.71998	-1.98841	-1.17652	-1.55556	-1.77056	-1.04648	-5.26061
orf19.5551	MIF2	Centromere-associated protein; similar to CENP-C proteins; Cse4p and Mif2p colocalize at C. albicans centromeres	0.0800598	-0.0704317	0.0496599	-1.7179	-1.7205	-1.18978	-1.495	-1.7779	-3.57562	-2.29919
orf19.1507	orf19.1507	Predicted ORF in Assemblies 19, 20 and 21; Plc1p-regulated	-1.09953	-1.01718	-0.710058	-1.71787	-1.23954	-1.51649	-1.74999	-2.32892	-3.45659	-4.66114
orf19.5596	orf19.5596	Predicted ORF in Assemblies 19, 20 and 21	0.0203253	-0.61619	-0.587102	-1.71775	-1.42106	-1.22983	-0.696514	-2.34934	-2.28365	-3.6041
orf19.6458	orf19.6458	Predicted ORF in Assemblies 19, 20 and 21	-1.65432	-1.34204	-1.56541	-1.7143	-1.70702	-1.45833	-1.64089	-1.59576	-2.06286	-2.99317
orf19.5934	orf19.5934	Predicted ORF in Assemblies 19, 20 and 21	1.15663	1.18043	1.15192	-1.71208	-1.53754	-1.2209	-1.34692	-1.47995	2.24947	-1.45022
orf19.6786	orf19.6786	Predicted ORF in Assemblies 19, 20 and 21; possibly spurious ORF (Annotation Working Group prediction)	0.518164	-0.00160784	0.535784	-1.71088	-1.4603	-0.0551694	-1.23431	-1.36211	-0.039449	-1.59165
orf19.96	TOP1	DNA topoisomerase I; required for wild-type growth and for wild-type mouse virulence; sensitive to camptothecin; induced upon adherence to polystyrene	-0.580666	-0.538167	0.526121	-1.7104	-0.853595	-1.29811	-1.40191	-2.1829	-1.96098	-2.38363
orf19.4002	DUN1	Protein similar to S. cerevisiae Dun1p, which is a serine-threonine protein kinase involved in DNA damage cell-cycle checkpoint; induced under Cdc5p depletion	0.574582	-0.496856	1.11683	-1.71039	-1.67871	-0.0948976	-1.50502	-2.4927	-1.76439	-3.18841
orf19.7517	CHT1	Chitinase; putative N-terminal catalytic domain; has secretory signal sequence; lacks S/T region and N-glycosylation motifs of Chs2p and Chs3p; alkaline downregulated; expression not detected in yeast-form or hyphal cells	0.629133	0.578446	0.558122	-1.70979	-1.70825	-0.116679	-1.38541	-1.94337	1.25214	-5.52016
orf19.4875	orf19.4875	Predicted ORF in Assemblies 19, 20 and 21	-1.97155	-1.31463	-1.37032	-1.70872	-1.52934	-0.272283	-1.57135	-1.51238	-1.37374	-1.91107
orf19.4376	orf19.4376	Predicted ORF in Assemblies 19, 20 and 21	-0.637286	0.44814	-0.543899	-1.70748	-1.5398	-1.23826	-1.41124	0.00200092	1.15819	-1.96398
orf19.389	orf19.389	Predicted ORF in Assemblies 19, 20 and 21	-0.620382	-0.0708318	-0.643492	-1.70555	-1.49674	-1.48309	-1.2825	1.9337	4.39717	1.90201
orf19.6628	orf19.6628	Predicted ORF in Assemblies 19, 20 and 21	-1.13125	-0.584112	-1.06455	-1.70461	-1.79602	-1.20424	-1.50416	-1.66054	-1.35085	-2.72205
orf19.2029	orf19.2029	Predicted ORF in Assemblies 19, 20 and 21	0.0172076	0.587151	-2.29442e-05	-1.70332	-1.73868	-1.19075	-1.44323	-2.42476	2.04543	-2.21081
orf19.1263	CFL1	Protein similar to ferric reductase Fre10p; possible functional homolog of S. cerevisiae Fre1p (reports differ); transcription is negatively regulated by Sfu1p, copper, amphotericin B, caspofungin; induced by ciclopirox olamine	-1.23869	-1.31762	-0.626319	-1.70039	-1.86274	-0.0225425	-1.72398	-1.50233	-1.73899	-1.51883
orf19.4308	HSL1	Probable protein kinase, involved in determination of morphology during the cell cycle of both yeast-form cells and hyphae via regulation of Swe1p and Cdc28p; required for full virulence and kidney colonization in mouse systemic infection	1.13956	1.14422	0.572515	-1.70014	-1.25099	-1.37974	-1.46294	1.09138	3.152	-1.39873
orf19.6610	orf19.6610	Predicted ORF in Assemblies 19, 20 and 21	0.147867	0.0659885	0.0650921	-1.69638	-1.64255	-1.26234	-1.35922	-0.0406532	2.22072	-2.60448
orf19.6119	orf19.6119	Predicted ORF in Assemblies 19, 20 and 21	0.129019	-0.680913	0.674455	-1.69614	-2.02132	-1.22253	-1.46581	-2.01263	-2.89917	-3.86659
orf19.2360	URA2	Predicted ORF in Assemblies 19, 20 and 21; flucytosine induced; macrophage/pseudohyphal-induced; intron in 5'-UTR	-1.06081	-1.25804	-1.13626	-1.69178	-1.61707	-1.23309	-1.68827	-2.35987	-2.70115	-2.69654
orf19.3439	orf19.3439	Predicted ORF in Assemblies 19, 20 and 21; greater mRNA abundance observed in a cyr1 homozygous null mutant than in wild type	-0.986291	-1.27978	-1.31502	-1.68898	-1.71469	-1.47089	-1.52341	-2.34534	-6.38564	1.6899
orf19.2876	CBF1	Functional homolog of S. cerevisiae Cbp1p centromere binding protein and transcription factor; contains basic helix-loop helix zipper DNA-binding/dimerization domain; mutant defects in morphology, sulfur amino acid biosynthesis, and growth	-1.52552	-1.3158	-1.27532	-1.68195	-1.78463	-1.05592	-1.41668	-2.89333	-2.70078	-3.36714
orf19.3960	orf19.3960	Predicted ORF in Assemblies 19, 20 and 21	0.135843	-0.562866	-0.0223828	-1.68182	-1.8156	-1.23416	-1.56145	-1.65107	1.11818	-2.53893
orf19.564	KAR3	Kinesin-like protein; required for nuclear fusion during mating; C-terminal motor domain; not essential for viability; similar to S. cerevisiae Kar3p, which is a microtubule motor that functions in mitosis and meiosis	-0.0787099	0.492927	-0.0176253	-1.67595	-1.36405	-1.25143	-1.29433	1.88802	3.86646	3.70937
orf19.7453	orf19.7453	Predicted ORF in Assemblies 19, 20 and 21; possibly spurious ORF (Annotation Working Group prediction)	-0.697839	0.0342329	-0.595341	-1.67391	-1.63568	-1.16091	-1.41785	-1.33553	3.49487	-1.26244
orf19.508	QDR1	Putative transporter of antibiotic resistance; transcription is regulated by Nrg1p and Tup1p; caspofungin repressed; expression is regulated upon white-opaque switching	-1.48114	-1.42425	-0.0873897	-1.67296	-1.74852	-0.68049	-1.44578	0.745277	3.40153	-3.1988
orf19.7413	orf19.7413	Predicted ORF in Assemblies 19, 20 and 21	0.0436017	0.47395	-0.038915	-1.67077	-1.46393	-1.19601	-1.46288	-2.19817	-1.28717	-1.88945
orf19.3291	HMT1	Major type I protein arginine methyltransferases	-0.702991	-1.21772	-1.14805	-1.66578	-1.58723	-1.23157	-1.43656	-1.74526	-2.34023	-2.09403
orf19.708	orf19.708	Predicted ORF in Assemblies 19, 20 and 21	1.08822	-0.00205919	1.08292	-1.66351	-1.58716	-1.19573	-1.3047	-1.54517	-0.119621	-2.02732
orf19.7621	orf19.7621	Predicted ORF in Assemblies 19, 20 and 21	-0.000191542	0.507958	0.0177412	-1.66062	-1.56523	-1.22113	-1.34837	-1.85579	-1.38853	-2.34638
orf19.4143	orf19.4143	Predicted ORF in Assemblies 19, 20 and 21	-2.10281	-1.21854	-1.46367	-1.65907	-0.783192	1.04894	-0.193731	-1.44043	-1.41051	-2.37842
orf19.6354	orf19.6354	Predicted ORF in Assemblies 19, 20 and 21; possibly spurious ORF (Annotation Working Group prediction)	-0.94888	-0.288671	-1.49971	-1.65604	-0.980263	-1.47051	-1.52468	-1.5504	-0.275802	-1.89036
orf19.1714	PGA44	Putative GPI-anchored protein of unknown function	1.3217	1.97963	0.602833	-1.656	1.43702	-1.98292	0.209315	10.251	19.3629	6.31884
orf19.5464	orf19.5464	ORF Predicted by Annotation Working Group	-0.973657	-0.247582	-1.56844	-1.65525	-1.6841	-1.73287	-1.82875	0.511258	-1.41122	-1.23229
orf19.2610	orf19.2610	Predicted ORF in Assemblies 19, 20 and 21	0.0668438	0.517525	0.580592	-1.65479	-1.60053	-0.048666	-1.28959	-2.53429	1.12396	-1.86672
orf19.2668	RHD2	Protein described as possible gag-pol polyprotein; decreased expression in hyphae compared to yeast-form cells	0.478183	-0.0348891	0.639469	-1.65027	-0.787618	1.25603	0.0303611	-1.87905	-1.49381	1.98823
orf19.1964	orf19.1964	Decreased transcription is observed upon fluphenazine treatment; increased transcription is observed upon benomyl treatment; regulated by Nrg1p, Tup1p	-1.45415	-1.31464	-0.652307	-1.64214	-1.74012	-1.0594	-1.43842	-1.12864	-1.02292	-1.77278
orf19.2209	YVC1	Protein similar to S. cerevisiae Yvc1p; transcription is repressed in response to alpha pheromone in SpiderM medium	1.25344	1.15986	0.630889	-1.64207	-1.84672	-1.25033	-1.32699	-2.02564	1.84064	-5.64458
orf19.2222	orf19.2222	Predicted ORF in Assemblies 19, 20 and 21	-1.74179	-1.54404	-1.55551	-1.6373	-1.5859	-1.43807	-1.63213	-1.56485	-0.331994	-1.6731
orf19.1447	orf19.1447	Predicted ORF in Assemblies 19, 20 and 21	1.08347	1.06661	1.08337	-1.63706	-0.110881	-1.28562	-1.29942	2.14361	8.35733	8.88729
orf19.5012	orf19.5012	Predicted ORF in Assemblies 19, 20 and 21; possibly spurious ORF (Annotation Working Group prediction)	-0.808626	-0.599021	-0.796259	-1.63634	-1.63934	0.00857009	-1.39675	-2.47214	-2.34507	-2.20989
orf19.1251	orf19.1251	Predicted ORF in Assemblies 19, 20 and 21	1.12023	0.539631	1.14651	-1.6323	-1.42263	-1.07059	-1.19075	-1.31072	1.29552	-2.69662
orf19.962	orf19.962	Predicted ORF in Assemblies 19, 20 and 21	-1.45682	-0.693451	-1.24888	-1.63146	-0.834302	-0.0741905	-0.71837	-1.62798	-1.58946	-2.14186
orf19.1238	TUB4	Putative gamma-tubulin; induced upon adherence to polystyrene; transcription is regulated by Nrg1p and Mig1p	1.11306	0.0355906	0.571922	-1.62776	-1.67694	-1.16643	-1.41571	-2.15348	-1.20513	-3.38533
orf19.7362	SKN1	Protein with predicted role in beta-1,6-glucan synthesis; probable N-glycosylated type II membrane protein; transcription and change in mRNA length induced by yeast-hyphal transition; transcription induced by Rim101p or caspofungin	0.574601	-0.0743776	-0.00713798	-1.62653	-1.45684	-1.30228	-1.20532	1.11984	2.08039	-1.11857
orf19.2823	RFG1	Transcriptional regulator of filamentous growth and hyphal genes; acts in Tup1p-dependent and -independent pathways; binds DNA; has HMG domain; not transcriptionally regulated by oxygen or serum; not responsible for hypoxic repression	-1.55457	-1.40079	-1.29659	-1.62582	-1.72564	-1.13011	-1.66705	-2.27413	-1.79104	-3.1849
orf19.4527	HGT1	High-affinity glucose transporter, member of major facilitator superfamily; transcription induced by progesterone and by drugs including chloramphenicol and benomyl; likely essential for growth, based on an insertional mutagenesis strategy	-1.205	-1.24749	-1.19304	-1.6229	-1.85177	-1.27225	-1.46174	2.5762	-6.61303	1.96119
orf19.6034	TUB2	Beta-tubulin; functional homolog of S. cerevisiae Tub2p; hyphal-induced; fluconazole-induced; gene has two introns; overproduction causes inviability in S. cerevisiae	0.576211	-1.08055	-0.518262	-1.61567	-1.64867	-1.29868	-1.39537	1.29909	4.5414	-1.18389
orf19.4208	RAD52	Required for wild-type repair of UV- or MMS-damaged DNA, for homologous DNA recombination, and for wild-type telomere length; constitutively expressed, MMS-induced; weakly complements S. cerevisiae rad52 mutant; DNA binding region conserved	-0.0464052	-1.12718	-0.519315	-1.60912	-1.54635	-1.28927	-1.31334	-2.1151	0.040571	-2.4089
orf19.4703	orf19.4703	Predicted ORF in Assemblies 19, 20 and 21	-0.0459288	-0.556326	0.0349655	-1.6066	-1.77024	-1.21684	-1.41787	-1.56316	1.289	-2.46682
orf19.4890	CLA4	S/T kinase of Ste20p family; required for wild-type filamentous growth and for wild-type organ colonization and virulence in mouse systemic infection; role in chlamydospore formation; functional homolog of S. cerevisiae Cla4p	0.608119	0.495668	1.047	-1.6028	-1.48355	-1.33355	-1.43644	-0.0541178	2.82509	0.00422564
orf19.3642	SUN41	Putative cell wall glycosidase involved in biofilm formation; hyphal induced; caspofungin repressed; Efg1p, Cph1p regulated; predicted signal sequence, O-glycosylation, potential Kex2p substrate; 9 5' E-boxes; 5'-UTR intron	1.1308	0.508689	1.11786	-1.6022	-1.59517	-1.20316	-1.34147	2.48992	6.95542	3.37532
orf19.2600	orf19.2600	Predicted ORF in Assemblies 19, 20 and 21	-0.603003	-0.600869	-0.573997	-1.60179	-1.46039	-1.21911	-1.41837	-1.78397	-1.07855	-2.09494
orf19.3631	orf19.3631	Predicted ORF in Assemblies 19, 20 and 21; possibly spurious ORF (Annotation Working Group prediction)	-1.08556	-0.700129	-0.0694733	-1.60138	-1.62716	-0.179702	-1.59626	-2.36162	-1.55566	-2.21696
orf19.3295	orf19.3295	Predicted ORF in Assemblies 19, 20 and 21; possibly spurious ORF (Annotation Working Group prediction)	-0.128668	-0.201005	-0.0849188	-1.60132	-1.4951	-1.10657	-1.30006	-1.79689	-0.250673	-1.65624
orf19.1932	CFL4	Similar to ferric reductase, C-terminal region; expression greater in low iron; transcription is negatively regulated by Sfu1p; ciclopirox olamine induced; shows colony morphology-related gene regulation by Ssn6p	1.47758	0.67166	1.91639	-1.60082	-1.81561	1.07993	-1.58734	-3.85717	-2.26132	0.00127606
orf19.7610	PTP3	Protein not essential for viability; similar to S. cerevisiae Ptp3p, which is a protein tyrosine phosphatase; hyphal induced; alkaline upregulated; regulated by Efg1p, Ras1p, cAMP pathways	-0.654505	-0.84145	-0.0871348	-1.60055	-1.67769	-0.679585	-1.45861	-1.69128	1.49708	-2.01342
orf19.4918	orf19.4918	Predicted ORF in Assemblies 19, 20 and 21	0.582053	0.0264122	1.06508	-1.59983	-1.57229	-1.12662	-1.5811	-1.86174	-1.65663	-1.7952
orf19.3474	IPL1	Predicted ORF in Assemblies 19, 20 and 21; induced during planktonic growth	-0.578519	-0.0929598	-0.586041	-1.59804	-1.7661	-1.22199	-1.522	-1.3221	-0.157604	-1.99193
orf19.3469	orf19.3469	Predicted ORF in Assemblies 19, 20 and 21; greater mRNA abundance observed in a cyr1 homozygous null mutant than in wild type	1.04646	-0.536029	-0.00852068	-1.59437	-1.56015	-0.041892	-1.28212	-3.36243	-1.75435	-1.8822
orf19.2875	orf19.2875	Predicted ORF in Assemblies 19, 20 and 21	-0.741831	-0.541451	-1.19038	-1.5913	-0.936022	-1.20365	-1.26566	1.11528	2.52346	-1.45315
orf19.7197	orf19.7197	Predicted ORF in Assemblies 19, 20 and 21	-1.20278	-1.10844	-0.565381	-1.59043	-0.712533	-0.10707	-1.27041	-1.66543	-3.01468	-2.58215
orf19.6474	orf19.6474	Predicted ORF in Assemblies 19, 20 and 21	-1.68969	-1.50178	-1.37149	-1.59021	-1.51489	-0.515241	-1.56275	-1.77291	-1.84462	0.101606
orf19.4450.1	orf19.4450.1	ORF Predicted by Annotation Working Group	-1.38181	-1.25551	-1.14598	-1.58882	-1.8865	-1.06341	-1.36633	-2.29508	-3.92971	-19.621
orf19.1485	orf19.1485	Predicted ORF in Assemblies 19, 20 and 21	-1.23504	-1.12321	-1.13545	-1.58767	-1.46913	-1.32847	-1.49782	-1.33249	-1.76302	-2.22921
orf19.5491	orf19.5491	Predicted ORF in Assemblies 19, 20 and 21; possibly spurious ORF (Annotation Working Group prediction)	0.603842	-0.583809	-0.0320513	-1.58743	-1.67366	-1.32424	-1.65973	-1.96616	-1.81977	-2.47494
orf19.4557	orf19.4557	Predicted ORF in Assemblies 19, 20 and 21	-0.665551	-1.31295	-0.719433	-1.58704	-1.81897	-1.39715	-1.70258	-0.131065	-0.062524	-3.63049
orf19.7308	TUB1	Alpha-tubulin; gene has intron; complements cold-sensitivity of S. cerevisiae tub1 mutant; C. albicans has single alpha-tubulin gene, whereas S. cerevisiae has two (TUB1, TUB3); farnesol-upregulated in biofilm	0.0860606	-0.0346362	0.0393924	-1.58106	-1.61192	-1.28983	-1.32224	1.88591	5.62181	-1.32385
orf19.3479	orf19.3479	Predicted ORF in Assemblies 19, 20 and 21	-1.36316	-1.18927	-1.08497	-1.57938	-1.37272	1.038	-1.21777	-1.51693	-2.17875	-2.03759
orf19.5271	orf19.5271	Predicted ORF in Assemblies 19, 20 and 21	0.64894	1.113	0.596964	-1.57927	-1.50636	-1.1876	-1.39932	-1.31123	1.13095	-3.6916
orf19.2778	orf19.2778	Predicted ORF in Assemblies 19, 20 and 21	-0.60739	-0.754681	-0.0499494	-1.57894	-1.36551	-1.35155	-1.6991	-1.51388	-3.12851	-3.71355
orf19.7353	orf19.7353	Predicted ORF in Assemblies 19, 20 and 21	-0.022444	-0.539542	-0.00329249	-1.57799	-1.48718	-1.1927	-1.24311	-1.68514	1.25248	-1.55428
orf19.767	ERG3	C-5 sterol desaturase; introduces C-5(6) double bond into episterol in ergosterol biosynthesis; clinically-isolated homozygous null mutants show azole resistance, defects in hyphal growth and virulence; Efg1p-repressed; fluconazole-induced	-1.11737	-0.645657	-0.00357117	-1.57711	-1.68839	-1.12985	-1.43048	-0.0205991	2.67683	2.76627
orf19.1633	orf19.1633	Predicted ORF in Assemblies 19, 20 and 21	-0.644358	-0.841196	-0.529043	-1.57533	-0.879592	-1.22855	-1.52837	-1.6742	-2.74093	-2.44636
orf19.2087	orf19.2087	Predicted ORF in Assemblies 19, 20 and 21	-0.0581196	0.559227	0.0565639	-1.57456	-1.2711	-1.05231	-1.20563	-1.83629	-1.18289	-1.59546
orf19.6211	orf19.6211	Predicted ORF in Assemblies 19, 20 and 21	1.23786	0.641854	0.0309037	-1.56925	-1.06217	-1.1855	-1.43196	-2.08094	1.35097	-1.81694
orf19.3934	CAR1	Transcription is regulated by Nrg1p, Mig1p, and Tup1p; shows colony morphology-related gene regulation by Ssn6p; alkaline upregulated	-0.0817143	-1.11518	1.03365	-1.56893	-1.56124	-1.11103	-1.37254	-1.44297	-1.42169	7.04915
orf19.1988	CDC45	Protein described as a DNA replication initiation factor; transcriptionally regulated by interaction with macrophage	0.477516	-0.507195	0.00218737	-1.56489	-0.9606	-1.10991	-1.29932	-1.88926	-1.40448	-2.2195
orf19.3965	orf19.3965	Predicted ORF in Assemblies 19, 20 and 21; possibly spurious ORF (Annotation Working Group prediction)	0.474125	-0.0174047	0.0769396	-1.56402	-0.995076	-1.22391	-1.41395	-2.60949	-1.5843	-1.81682
orf19.3430	orf19.3430	Predicted ORF in Assemblies 19, 20 and 21; possibly spurious ORF (Annotation Working Group prediction)	0.09105	-0.168941	0.598971	-1.56378	-1.40754	-1.50206	-1.64037	1.11173	1.37111	-0.0905891
orf19.6234	orf19.6234	Predicted ORF in Assemblies 19, 20 and 21	-1.29819	-1.20942	-1.14209	-1.56312	-1.32923	-1.28944	-1.28353	-1.4461	-2.48006	-2.33427
orf19.4647	HAP3	Protein described as similar to CCAAT-binding transcription factor that regulates respiration; expression greater in low iron; transcription is opaque specific, alkaline upregulated, ciclopirox olamine induced	-1.55026	-0.822207	-1.67782	-1.56287	-1.60909	-1.61979	-1.81336	-4.15531	-2.80137	0.473946
orf19.964	orf19.964	Predicted ORF in Assemblies 19, 20 and 21	0.0399348	-0.0155524	0.507356	-1.55729	-0.955258	-1.20925	-1.26673	-1.21844	1.87254	-1.88152
orf19.1509	ROD1	Protein not essential for viability; similar to S. cerevisiae Rod1p, which is a membrane protein with a role in drug tolerance; repressed by Rgt1p	-1.37186	-1.26799	-1.22693	-1.55699	-1.5192	-1.10346	-1.27966	-1.87203	-1.76509	-2.51546
orf19.3788	orf19.3788	Predicted ORF in Assemblies 19, 20 and 21; possibly spurious ORF (Annotation Working Group prediction)	0.532032	0.586028	1.17922	-1.55686	-1.52677	-1.25116	-1.29013	-1.30413	1.18886	-2.01995
orf19.4325	orf19.4325	Predicted ORF in Assemblies 19, 20 and 21	-1.05896	-0.0629778	-1.05996	-1.55307	-1.50542	-1.17633	-1.2562	-1.7352	-1.03694	-2.54557
orf19.1482	orf19.1482	Predicted ORF in Assemblies 19, 20 and 21; expression regulated during planktonic growth	-1.51059	-0.811515	-1.21481	-1.55279	-1.64652	-1.11928	-1.37173	-1.59571	-0.236008	-1.96426
orf19.2511.1	MRPL33	ORF Predicted by Annotation Working Group; increased expression observed in an ssr1 homozygous null mutant	-1.35955	-1.26937	-1.15557	-1.5525	-1.48463	-0.10674	-1.45639	-1.33057	-1.63562	-1.60602
orf19.2179	SIT1	Transporter of ferrichrome siderophores, but not ferrioxamine B; required for wild-type invasion of human epithelial cells in vitro, but not for wild-type systemic virulence in mouse; transcription regulated by iron, Sfu1p, Rfg1p, Tup1p	-1.27929	-1.36824	-1.25155	-1.55226	-1.51287	-0.00526937	-1.33392	-3.28324	-6.01117	-1.04142
CaalfMp09	NAD2	Subunit 2 of NADH:ubiquinone oxidoreductase (NADH:ubiquinone dehydrogenase), a multisubunit enzyme complex (complex I) of the mitochondrial inner membrane that catalyzes the first step in mitochondrial respiration	-1.3877	-2.85122	-0.149207	-1.55035	-1.51484	-1.79215	-1.6989	-2.22895	-1.55617	#DIV/0!
orf19.1934	orf19.1934	Predicted ORF in Assemblies 19, 20 and 21; repressed upon high-level peroxide stress	0.577981	1.06705	1.09797	-1.55001	-0.937498	-1.13601	-1.26664	-1.37724	0.0363877	-1.8341
orf19.4697	MDN1	Protein induced during the mating process	-0.622749	-1.3416	-1.24543	-1.54783	-1.49462	-1.43359	-1.61986	-2.42911	-2.6078	-2.92588
orf19.2513	orf19.2513	Predicted ORF in Assemblies 19, 20 and 21	-0.684231	-1.25911	-1.44935	-1.54703	-1.61735	-1.28142	-1.50095	-1.427	-2.76156	-1.89263
orf19.4378	orf19.4378	Predicted ORF in Assemblies 19, 20 and 21	0.0700513	0.0419725	0.606533	-1.54605	-1.62192	-1.13528	-1.34844	-2.4145	-1.19379	-2.17133
orf19.695	RGS2	Protein of RGS superfamily; not essential for viability; possibly spurious ORF	-1.70708	-1.16022	-1.62077	-1.54466	-1.58743	-1.42476	-1.56092	-3.69853	-4.44203	-4.2645
orf19.3042	orf19.3042	Predicted ORF in Assemblies 19, 20 and 21; possibly spurious ORF (Annotation Working Group prediction)	0.502992	1.05591	1.19765	-1.54443	-1.26831	-1.2576	-1.19636	1.21126	2.31799	-1.68092
orf19.2088	orf19.2088	Predicted ORF in Assemblies 19, 20 and 21	-1.42524	-0.597323	-1.21444	-1.53917	-1.42632	-1.18041	-0.70485	-2.36529	-0.00218737	-1.76486
orf19.3471	orf19.3471	Predicted ORF in Assemblies 19, 20 and 21	-1.56454	-1.25575	-1.39753	-1.53876	-1.44509	-1.37279	-1.31501	-1.23252	1.17881	2.01264
orf19.1109	orf19.1109	Predicted ORF in Assemblies 19, 20 and 21	-1.5754	-1.29435	-1.34326	-1.53621	-1.50905	-1.13263	-1.23484	-1.58178	-1.65763	-1.38485
orf19.3466	orf19.3466	Predicted ORF in Assemblies 19, 20 and 21; decreased transcription is observed upon fluphenazine treatment or in an azole-resistant strain that overexpresses CDR1 and CDR2	1.11357	0.47377	0.600696	-1.53517	-1.31971	-1.25913	-1.3218	-2.22497	-1.73087	-1.62042
orf19.6862	orf19.6862	Predicted ORF in Assemblies 19, 20 and 21	-1.20487	-1.19038	-1.16801	-1.53514	-1.28587	-1.17773	-1.28608	-1.733	-2.81081	-2.12758
orf19.7502	orf19.7502	Predicted ORF in Assemblies 19, 20 and 21; greater mRNA abundance observed in a cyr1 homozygous null mutant than in wild type; possibly spurious ORF (Annotation Working Group prediction)	0.530687	0.00461185	-0.622316	-1.53295	-1.27854	-0.0469489	-1.33707	-1.14499	-1.55061	-1.82915
orf19.2934	orf19.2934	Predicted ORF in Assemblies 19, 20 and 21	-0.663846	-1.18654	-0.0369337	-1.53141	-1.34804	-0.156625	-1.37792	-1.42255	-2.23777	-2.12008
orf19.6311	orf19.6311	Predicted ORF in Assemblies 19, 20 and 21	-1.3524	-1.2773	-0.060992	-1.5312	-1.48292	-1.21818	-1.61591	-0.119022	-4.45256	1.2309
orf19.3448	orf19.3448	Predicted ORF in Assemblies 19, 20 and 21; ketoconazole-repressed; possibly spurious ORF (Annotation Working Group prediction)	-1.41415	-1.36736	-1.29299	-1.53053	-1.50636	-1.34356	-1.44251	-2.02268	-3.29688	-2.09987
orf19.4746	JIP5	Protein not essential for viability; downregulated during core stress response	-1.49068	-1.27784	-1.27127	-1.52879	-0.784384	-1.14657	-1.18219	-1.78308	-3.2407	-3.04413
orf19.7402	orf19.7402	Predicted ORF in Assemblies 19, 20 and 21	1.13207	0.588351	1.11187	-1.52856	-1.50945	-1.23304	-1.24388	-1.12558	1.64493	-1.66532
orf19.4526	HSP30	Protein described as similar to heat shock protein; fluconazole-downregulated; amphotericin B induced	-0.0407441	-0.857203	-0.00838309	-1.52703	-1.48394	-0.673817	-1.49915	0.679643	-1.29936	-0.254224
orf19.6540	PFK2	Beta subunit of phosphofructokinase (PFK), which is a heteromultimer of Pfk1p and Pfk2p; PFK is activated by fructose 2,6-bisphosphate or AMP, inhibited by ATP; downregulated upon phagocytosis or hyphal growth; fluconazole-induced	-1.45978	-1.40602	-1.357	-1.52702	-1.70263	-1.14765	-1.20646	-2.50589	-2.35917	-3.23618
orf19.789.1	orf19.789.1	Predicted ORF in Assembly 20 and 21	-1.53556	-0.86169	-0.824699	-1.526	-1.46314	-1.20971	-1.41891	-1.74913	-2.01194	-0.762448
orf19.3938	orf19.3938	Predicted ORF in Assemblies 19, 20 and 21	-1.34665	-1.24328	-1.29897	-1.52442	-1.55404	-1.25212	-1.46465	-1.27987	-1.32102	-1.6504
orf19.4874	MNN3	Predicted Golgi alpha-1,2-mannosyltransferase	-0.594438	-1.13101	-0.570141	-1.5236	-1.31687	-1.24807	-1.29584	-1.11901	-1.06382	-1.86348
orf19.4681	RAT1	5'-->3' exoribonuclease; similar to S. cerevisiae nuclear exoribonuclease Rat1p; suppresses S. cerevisiae kem1 mutant slow growth, mating defect, and haploid invasive growth defect	-1.25038	-1.2963	-1.12588	-1.52258	-1.46437	-1.22689	-1.4017	-1.33681	-1.54498	-2.56246
orf19.5827	BUB2	Predicted ORF in Assemblies 19, 20 and 21; described as similar to S. cerevisiae Bub2p; induced upon adherence to polystyrene; fungal-specific (no human or murine homolog)	0.00312243	0.510728	1.12357	-1.52246	-1.35846	-1.12885	-1.306	-1.48298	-1.15939	-3.66972
orf19.5625	orf19.5625	Predicted ORF in Assemblies 19, 20 and 21	-1.27001	-1.2244	-1.27226	-1.52089	-1.45203	-1.02899	-1.19152	-1.32165	-1.41485	-0.146385
orf19.2119	NDT80	Activator of CDR1 induction by antifungal drugs; required for wild-type drug resistance; transcriptionally induced upon antifungal drug treatment; similar to S. cerevisiae Ndt80p, which is a meiosis-specific transcriptional regulator	-1.18644	-1.13332	-1.11126	-1.5186	-1.4615	-1.14875	-1.17161	-1.62366	-2.00401	-1.15691
orf19.1287	orf19.1287	Predicted ORF in Assemblies 19, 20 and 21; possibly spurious ORF (Annotation Working Group prediction)	-1.28159	-1.25887	-0.612697	-1.51613	-1.42928	-1.08128	-1.30464	-3.87907	-6.47573	-2.19215
orf19.5292	AXL2	Protein not essential for viability; similar to S. cerevisiae Axl2p, which is a plasma membrane protein involved in determination of budding pattern; O-glycosylated by Pmt4p	-0.0220855	-1.15675	-1.21138	-1.51473	-0.99692	-1.3422	-1.55452	-1.48609	3.72044	-1.34156
orf19.4518	orf19.4518	Protein not essential for viability	-1.50099	-1.24713	-1.3862	-1.51062	-1.38337	-1.21675	-1.2515	-1.44679	-1.21139	-0.376444
orf19.6314	RPB8	Protein described as a subunit of RNA polymerases I, II, and III; regulated by Gcn4p; repressed in response to amino acid starvation (3-aminotriazole treatment)	-0.749087	-1.26519	-1.21678	-1.51004	-1.43259	-1.24723	-1.3891	-1.27054	-1.75118	-1.82392
orf19.6921	orf19.6921	Predicted ORF in Assemblies 19, 20 and 21	-0.676466	-0.628564	-0.10417	-1.50885	-1.51456	-1.12433	-1.45125	-2.08582	-1.91644	-2.02753
orf19.6155	orf19.6155	Predicted ORF in Assemblies 19, 20 and 21	0.616393	0.587459	0.597009	-1.50725	-1.44158	-1.22099	-1.36602	-1.5042	1.7118	-1.68094
orf19.385	GCV2	Putative protein of glycine catabolism; downregulated by Efg1p; Hog1p-induced; upregulated by Rim101p at acid pH	-0.595834	-0.549259	1.06953	-1.50716	-1.5789	-1.06668	-1.26686	-2.53758	-2.88429	1.65589
orf19.245	DDC1	Transcription is induced during filamentous growth; regulated by Nrg1p, Tup1p	-1.31422	-1.10881	-1.19387	-1.50597	-1.61406	-1.40232	-1.47123	-1.89741	-1.25148	-1.48598
orf19.5488	orf19.5488	Predicted ORF in Assemblies 19, 20 and 21	-0.631568	-0.582292	-0.583424	-1.50554	-0.85055	-1.19545	-1.29046	-1.99679	1.4387	-0.0478498
orf19.1116	orf19.1116	Predicted ORF in Assemblies 19, 20 and 21; possibly spurious ORF (Annotation Working Group prediction)	0.809029	0.545948	1.00571	-1.50482	-1.585	-1.21408	-1.28761	-1.34002	1.8227	-2.17292
orf19.1578	orf19.1578	Predicted ORF in Assemblies 19, 20 and 21	-0.563957	-0.667302	-1.12266	-1.50198	-1.30296	-1.20039	-1.35834	-1.61674	-1.89614	-2.49452
orf19.6025	orf19.6025	Predicted ORF in Assemblies 19, 20 and 21	-1.29207	-1.23426	-0.67369	-1.50195	-1.42852	-1.23585	-1.46863	-1.28952	-1.72299	1.15032
orf19.7514	PCK1	Phosphoenolpyruvate carboxykinase; role in gluconeogenesis; regulated by hyphal switch, carbon source; repressed on glucose; induced by fluconazole, phagocytosis, H2O2; predicted ATP-dependent, dimeric; predicted PKC phosphorylation sites	0.487426	0.00317447	1.15335	-1.50153	-1.48355	1.07701	-1.44311	0.231004	-1.49206	1.74684
orf19.2002	orf19.2002	Predicted ORF in Assemblies 19, 20 and 21	-0.535587	-1.2635	0.496298	-1.50146	-1.42698	-1.40102	-1.46185	-1.50147	-2.14556	-2.15714
orf19.2832	orf19.2832	Protein with similarity to S. cerevisiae Inn1p, which is an essential protein of the contractile actomyosin ring required for ingression of the plasma membrane into the bud neck during cytokinesis; contains a C2 membrane targeting domain	-0.627387	-0.738051	-1.13386	-1.49935	-1.4533	-1.25365	-1.35309	1.05764	-0.0152035	-1.58347
orf19.5166	DBF4	Predicted ORF in Assemblies 19, 20 and 21; macrophage/pseudohyphal-repressed	0.611688	0.567715	1.12687	-1.49922	-0.936998	-1.14746	-1.34384	-1.26441	1.29073	-1.3089
orf19.3902	orf19.3902	Predicted ORF in Assemblies 19, 20 and 21; decreased transcription is observed upon fluphenazine treatment or in an azole-resistant strain that overexpresses CDR1 and CDR2	-0.30775	-0.508347	0.110362	-1.49822	-1.61732	-0.256394	-0.910913	-0.9856	-1.75778	-7.56164
orf19.2643	orf19.2643	Predicted ORF in Assemblies 19, 20 and 21	-1.29321	-1.32606	-1.27433	-1.49707	-1.40052	-1.24709	-1.31973	-1.31229	-1.75507	-1.66835
orf19.5742	ALS9	ALS family protein; expressed during infection of human epithelial cells; confers laminin adhesion to S. cerevisiae; highly variable; ALS family includes cell-surface glycoproteins, some with adhesin function; putative GPI-anchor	-2.00497	-1.81814	-1.83134	-1.49664	-1.76703	0.68031	-1.42386	-1.21555	-1.44747	-1.47863
orf19.7394	GDA1	Golgi membrane GDPase, required for wild-type O-mannosylation, not N-glycosylation; required for wild-type hyphal induction, cell wall, and cell surface charge; not required for HeLa cell adherence; functional homolog of S. cerevisiae Gda1p	1.07656	0.53239	-0.544238	-1.49639	-1.37573	-1.30952	-1.27814	1.1554	2.30429	-1.27589
orf19.4168	orf19.4168	Predicted ORF in Assemblies 19, 20 and 21	-1.31235	-1.04342	-0.712459	-1.49615	-0.30099	0.0273	-1.26832	-1.53624	-1.64386	-2.07556
orf19.4865	orf19.4865	Predicted ORF in Assemblies 19, 20 and 21	-0.171381	-1.2496	-0.548175	-1.49173	-1.6186	-1.36541	-1.49615	-1.43063	1.10937	-1.27998
orf19.3990	orf19.3990	Predicted ORF in Assemblies 19, 20 and 21	-0.557681	-0.602104	-0.561349	-1.49135	-0.743235	-1.23518	-1.37149	-1.10171	-1.29041	-2.04193
orf19.5134	orf19.5134	Predicted ORF in Assemblies 19, 20 and 21	-0.129364	-0.0926757	-0.596244	-1.48903	-0.738072	-1.10759	-1.33134	-1.7255	-2.39974	-2.7174
orf19.6896	orf19.6896	Predicted ORF in Assemblies 19, 20 and 21	1.23655	-0.55156	0.627286	-1.48786	-1.61199	-1.37778	-1.51016	-1.46956	1.69029	-1.20511
orf19.7586	CHT3	Chitinase, major; functional homolog of S. cerevisiae Cts1p; 4 N-glycosylation motifs; possible O-mannosylated region; putative signal peptide; hyphal-repressed; farnesol upregulated in biofilm; regulated by Efg1p, Cyr1p, Ras1p	-1.7627	-1.64794	-1.52611	-1.48773	1.40839	-1.94079	-1.21106	1.82417	1.93375	4.56918
orf19.6242	orf19.6242	Predicted ORF in Assemblies 19, 20 and 21	-0.0343837	-0.691085	0.579222	-1.48594	-1.46362	-1.19559	-1.25532	1.0885	1.3145	-2.17828
orf19.1566	orf19.1566	Predicted ORF in Assemblies 19, 20 and 21	-1.13372	-1.23603	-1.10179	-1.48245	-1.39309	-1.29034	-1.31168	-1.50425	-2.39961	-2.19561
orf19.5051	orf19.5051	Predicted ORF in Assemblies 19, 20 and 21	-1.27049	-0.0581518	-1.16512	-1.4812	-0.788123	-1.23057	-1.22328	-1.33108	-1.20847	-1.67336
orf19.1772	orf19.1772	Predicted ORF in Assemblies 19, 20 and 21	-1.30799	-0.603677	-0.58004	-1.48084	-0.748675	-1.31977	-1.31312	-1.40132	-2.01825	-2.39534
orf19.955	orf19.955	Predicted ORF in Assemblies 19, 20 and 21; possibly spurious ORF (Annotation Working Group prediction)	0.0304154	-0.546466	0.0314262	-1.47962	-1.6026	-1.25814	-1.36136	-1.3335	0.0153653	-2.41901
orf19.7304	orf19.7304	Predicted ORF in Assemblies 19, 20 and 21	-0.613668	-1.06967	-0.579227	-1.47915	-1.5575	-1.17986	-1.35424	-1.7996	1.93953	1.78572
orf19.5674	PGA10	Plasma membrane protein involved in heme-iron utilization; allows utilization of hemin and hemoglobin as iron sources in host tissues; predicted GPI anchor; ketoconazole, ciclopirox olamine, or hyphal-induced; upregulated by Rim101p at pH 8	0.00767525	-0.820861	-0.17592	-1.47893	-1.55862	0.237082	-1.08493	-1.09685	0.707246	-2.0317
orf19.5066	orf19.5066	Predicted ORF in Assemblies 19, 20 and 21; essential; S. cerevisiae ortholog is essential	-1.49175	-1.14148	-0.1495	-1.47693	-0.763545	-1.09052	-0.759192	-1.2958	-1.81455	-1.73144
orf19.1609	orf19.1609	Predicted ORF in Assemblies 19, 20 and 21	-0.780093	-1.05834	-1.18437	-1.476	-0.136603	-1.12098	-1.20351	-1.22112	-1.46206	-1.94805
orf19.6526	orf19.6526	Predicted ORF in Assemblies 19, 20 and 21	1.17731	0.556235	1.20649	-1.47572	-1.34315	-1.06671	-1.29828	1.27449	1.48147	-1.57491
orf19.1106	orf19.1106	Predicted ORF in Assemblies 19, 20 and 21; fluconazole-induced	-1.03046	-0.400673	-0.826626	-1.47528	-1.46872	-0.729714	-1.00675	-1.4558	-2.32683	-1.85066
orf19.6782	orf19.6782	Predicted ORF in Assemblies 19, 20 and 21	-1.23746	-1.22474	-1.19091	-1.47478	-1.47569	-1.17851	-1.50072	-2.6357	-1.99818	-4.04205
orf19.4162	orf19.4162	Predicted ORF in Assemblies 19, 20 and 21	0.519464	1.11283	1.10298	-1.47384	-0.865176	-0.0370236	-1.34675	-1.70908	1.41627	-2.3711
orf19.1834	orf19.1834	Predicted ORF in Assemblies 19, 20 and 21	0.0739999	-0.0169806	-0.0560577	-1.47373	-1.43361	-1.42283	-1.48805	-2.3207	-0.0423593	-3.24944
orf19.5390	orf19.5390	Predicted ORF in Assemblies 19, 20 and 21; possibly spurious ORF (Annotation Working Group prediction)	-1.27344	-1.14666	-0.654723	-1.4734	-1.5869	-1.1243	-1.243	-1.2646	-1.12138	-1.20098
orf19.1505	orf19.1505	Predicted ORF in Assemblies 19, 20 and 21	-1.49858	-0.758629	-0.204933	-1.47298	-1.47396	-1.27409	-1.40235	-1.73441	-1.89805	1.96728
orf19.3648	orf19.3648	Predicted ORF in Assemblies 19, 20 and 21	0.584995	0.560132	0.600758	-1.4725	-1.44024	-1.17615	-1.20971	-1.73916	0.0174422	-1.41312
orf19.3724	orf19.3724	Predicted ORF in Assemblies 19, 20 and 21	-1.53087	-1.14605	-1.20969	-1.47201	-0.284672	-1.19468	-1.17873	-1.69554	-1.65885	-2.45403
orf19.3670	GAL1	Galactokinase; transcription regulated by galactose; transcription regulated by Mig1p and Tup1p; not required for systemic mouse virulence; farnesol-downregulated in biofilm; fluconazole-induced	-1.2027	-0.665609	-1.08362	-1.47198	-1.5722	-1.24227	-1.50664	-1.59469	-4.13741	1.16372
orf19.3211	RCF3	Transcription is induced upon filamentous growth	0.522961	0.023346	0.0154579	-1.47169	-1.424	-1.25554	-1.33985	-2.12525	-1.24326	-1.40688
orf19.3159	UTP20	Protein likely to be essential for growth, based on an insertional mutagenesis strategy; similar to S. cerevisiae Utp20p, which is a putative snoRNA-binding protein; downregulated in core stress response	0.525708	-1.30268	0.589786	-1.4715	-1.27427	-1.31078	-1.49972	-1.84926	-2.26032	-2.68248
orf19.4702	orf19.4702	Predicted ORF in Assemblies 19, 20 and 21; expression regulated during planktonic growth; possibly spurious ORF (Annotation Working Group prediction)	0.6041	0.539737	1.1756	-1.47089	-1.35651	-1.20954	-1.2478	-1.55084	1.45003	-1.59197
orf19.7588	orf19.7588	Predicted ORF in Assemblies 19, 20 and 21	-0.613231	-0.573595	-0.513214	-1.46951	-1.5016	0.0460768	-1.38049	-2.82445	-3.96273	-2.32303
orf19.3356	orf19.3356	Predicted ORF in Assemblies 19, 20 and 21	0.179352	-0.470811	0.633133	-1.46877	-1.46496	-1.22325	-1.30116	-1.19475	1.47075	-2.34221
orf19.1642	orf19.1642	Predicted ORF in Assemblies 19, 20 and 21	-1.43334	-1.15122	-1.17925	-1.4678	-0.177949	-1.02671	-1.17038	-1.44182	-1.8944	-2.30752
orf19.4337	orf19.4337	Predicted ORF in Assemblies 19, 20 and 21	0.503051	-0.0584358	0.528626	-1.4665	-1.39555	-0.0315104	-1.43734	-1.79043	-1.69235	-2.09792
orf19.3624	orf19.3624	Predicted ORF in Assemblies 19, 20 and 21	-1.24125	-1.21838	-1.15264	-1.466	-1.29051	-1.29527	-1.23598	-1.56591	-1.80725	-1.89862
orf19.868	ADAEC Ada DNA repair metal binding	Transcription is specific to white cell type	-0.946254	-1.32576	-0.986254	-1.46557	-1.65435	-1.20022	-1.38995	-2.32061	-3.43907	-1.27537
orf19.4635	NIP1	Putative translation initiation factor; genes encoding ribosomal subunits, translation factors, and tRNA synthetases are downregulated upon phagocytosis by murine macrophage	-0.544467	-0.648273	-0.538598	-1.46244	-1.31397	-1.21591	-1.50121	-1.37938	-1.97207	-1.85642
orf19.5287	orf19.5287	Predicted ORF in Assemblies 19, 20 and 21	-1.25153	-1.04379	0.475931	-1.45963	-1.36227	-0.0776255	-0.0929928	-1.74823	1.51471	-1.76521
orf19.792	orf19.792	Predicted ORF in Assemblies 19, 20 and 21	-0.555332	-0.893993	-1.43491	-1.45932	-1.44911	-1.13399	-1.37376	-1.71159	-2.61905	-3.52283
orf19.3839	SAP10	Secreted aspartyl proteinase; roles in adhesion, virulence (RHE model), cell surface integrity; distinct specificity from Sap9p; at cell membrane and wall; GPI-anchored; N-glycosylated; expression greater in low iron	-1.37514	-1.19127	-0.610012	-1.45699	-1.34329	-1.06677	-0.697206	-2.09524	-1.84353	1.30748
orf19.4657	orf19.4657	Predicted ORF in Assemblies 19, 20 and 21	-1.43601	-1.42139	-1.23157	-1.4569	-1.49748	-1.12923	-1.14593	-0.269833	-0.291396	-1.89163
orf19.2763	orf19.2763	Protein not essential for viability; orf19.10279 possibly transcriptionally regulated upon hyphal formation	-1.31273	-1.47699	-1.24242	-1.45685	-1.56431	-1.34671	-1.44334	-2.8713	-1.98938	-1.82657
orf19.173	orf19.173	Putative transcription factor with zinc finger DNA-binding motif	-0.855425	-1.45928	-1.32926	-1.45672	-1.56361	-1.28377	-1.359	-2.72715	-4.33923	-2.06009
orf19.3685	PSY2	Predicted ORF in Assemblies 19, 20 and 21; macrophage-induced gene	-1.2247	-1.16817	-0.563702	-1.45621	-1.34399	-1.24086	-1.26796	-1.57681	1.08268	-1.36602
orf19.76	orf19.76	Predicted ORF in Assemblies 19, 20 and 21	-0.316119	-0.721393	-0.667438	-1.45391	-0.413156	-0.777585	-1.24545	-1.54799	-2.30668	-2.11682
orf19.3248	orf19.3248	Predicted ORF in Assemblies 19, 20 and 21	0.564442	-0.531443	0.542699	-1.45074	-1.38854	-1.25078	-1.26457	-1.18779	0.0308315	-1.87672
orf19.3406	orf19.3406	Predicted ORF in Assemblies 19, 20 and 21	-0.627095	-1.25436	0.506459	-1.4493	-1.36953	-0.0609621	-1.27494	1.965	2.47958	-2.62311
orf19.3941	URA7	Predicted ORF in Assemblies 19, 20 and 21; flucytosine induced	0.0203283	-1.09907	-0.0322737	-1.44612	-1.37105	-1.04719	-1.33272	-2.07908	-2.33284	-2.0984
orf19.145	RPB4	Protein similar to S. cerevisiae Rpb4p, which is a component of RNA polymerase II; transposon mutation affects filamentous growth	-1.49237	-1.28708	-1.3557	-1.44604	-1.35378	-1.13231	-1.36048	-1.52454	-1.84422	-1.34537
orf19.2688	orf19.2688	Predicted ORF in Assemblies 19, 20 and 21	-0.604173	-0.628969	-1.12511	-1.44504	-1.2955	-1.18852	-1.29809	-1.39434	-2.1413	-2.29224
orf19.327	HTA3	Protein described as histone H2A; amphotericin B repressed; flucytosine induced; RNA abundance regulated by tyrosol and cell density	-0.535218	-0.563951	1.11265	-1.44464	-1.44902	-1.12277	-1.21208	-2.00892	-1.49787	-2.5731
orf19.4273	orf19.4273	Predicted ORF in Assemblies 19, 20 and 21	-0.0482709	-1.14771	-1.07203	-1.44293	-0.761882	-1.16807	-1.3231	-1.30175	-1.8614	-1.80502
orf19.778	PIL1	Echinocandin-binding protein; localizes to cell surface of hyphae, but not yeast-form cells; fungal-specific (no human or murine homolog)	-0.297077	-1.30118	-1.12438	-1.44198	-1.33275	-1.27103	-0.748932	-2.82441	-3.17334	-1.39407
orf19.6789	orf19.6789	Predicted ORF in Assemblies 19, 20 and 21	-0.520205	-1.05199	-0.514566	-1.44115	-1.4744	-1.34472	-1.31047	-1.21044	1.30787	0.0608349
orf19.2174	RAD57	Essential protein; described as having role in DNA recombination, repair; transcriptionally induced by interaction with macrophage; transcription is regulated by Nrg1p, Mig1p, and Tup1p; S. cerevisiae ortholog is essential	-0.000855782	0.562665	0.0170314	-1.44114	-1.39346	-0.0557242	-1.21395	-1.67348	-1.22592	-1.79343
orf19.2426	orf19.2426	Predicted ORF in Assemblies 19, 20 and 21	0.0253699	-0.0307819	0.547787	-1.44112	-1.44097	-1.22641	-1.19368	1.15545	2.20296	-2.23526
orf19.5597	POL5	Predicted ORF in Assemblies 19, 20 and 21; induced upon biofilm formation	-1.34479	-1.32519	-1.35045	-1.44042	-1.47882	-1.42283	-1.4934	-1.47677	-1.77538	-2.58206
orf19.81	orf19.81	Predicted ORF in Assemblies 19, 20 and 21	-0.663889	-0.632975	-0.629629	-1.43999	-1.37699	-1.23972	-1.41826	-1.35932	-2.30515	-2.61226
orf19.409	orf19.409	Predicted membrane protein; similar to S. cerevisiae Ynr018Wp	-1.09465	-0.560159	0.532881	-1.43938	-1.35263	-1.13627	-1.31702	1.3881	1.19031	-1.74996
orf19.3536	orf19.3536	Predicted ORF in Assemblies 19, 20 and 21	-0.139706	0.00776808	-0.0134243	-1.43928	-0.828333	-1.11241	-1.19205	-1.67806	-1.3183	-1.53749
orf19.3949	orf19.3949	Predicted ORF in Assemblies 19, 20 and 21	-1.565	-1.24842	-1.26834	-1.43859	-1.3528	-1.17054	-1.22015	-2.15756	-1.55857	-1.31097
orf19.3616	ERG9	Putative farnesyl-diphosphate farnesyl transferase (squalene synthase) involved in the sterol biosynthesis pathway; likely to be essential for growth; regulated by fluconazole and lovastatin; amphotericin B, caspofungin repressed	-0.0140202	-0.61476	0.0171137	-1.437	-1.32016	-1.24512	-1.37421	-1.17406	0.114371	-1.32054
orf19.3751	orf19.3751	Predicted ORF in Assemblies 19, 20 and 21	-0.0139445	-0.547321	0.0323337	-1.43665	-0.845918	-1.35562	-1.31133	1.61163	2.1238	1.62613
orf19.3794	ZAP1	Putative DNA-binding transcription factor; 5 C-terminal zinc-finger motifs; similar to S. cerevisiae Zap1p; transposon mutation affects filamentous growth; suppresses S. cerevisiae rok1 mutant inviability	-0.587897	-0.218834	0.627543	-1.43602	-1.72412	1.19758	-1.51897	-3.05368	-2.48084	-3.40909
orf19.6612	orf19.6612	Predicted ORF in Assemblies 19, 20 and 21	-1.32527	-1.2568	-1.294	-1.43493	-1.46024	-1.2441	-1.34335	-1.59208	-1.62361	-1.28063
orf19.2926	orf19.2926	Predicted ORF in Assemblies 19, 20 and 21	-0.552289	-0.559818	-0.0471772	-1.43375	-1.4819	-1.24897	-1.30762	-1.76181	-1.49258	-0.311471
orf19.5519	GCV1	Protein described as T subunit of glycine decarboxylase; transcription is negatively regulated by Sfu1p	-0.570087	-1.21268	-1.1004	-1.43305	-1.30685	-1.2142	-1.38136	-4.28432	-5.27145	-1.24609
orf19.58	orf19.58	Predicted ORF in Assemblies 19, 20 and 21	-1.35509	-0.033904	-1.11303	-1.43204	-0.193253	-1.04902	-0.0655939	-1.48865	-1.74009	-2.394
orf19.6291	orf19.6291	Predicted ORF in Assemblies 19, 20 and 21	-0.030447	-1.07771	-1.09141	-1.4296	-1.45894	-1.15079	-1.36879	-1.79229	-1.24738	-2.17073
orf19.1668	orf19.1668	Predicted ORF in Assemblies 19, 20 and 21; decreased expression observed in an ssr1 homozygous null mutant; possibly spurious ORF (Annotation Working Group prediction)	0.536821	-0.5477	0.551863	-1.42838	-1.34933	-1.17652	-1.32677	-1.59766	-0.0234778	-1.71988
orf19.3867	RPL7	Putative ribosomal-related protein; genes encoding cytoplasmic ribosomal subunits, translation factors, and tRNA synthetases are downregulated upon phagocytosis by murine macrophage	-0.0898089	-1.07082	-0.574508	-1.42679	-1.18828	-1.12821	-1.30125	1.07668	-1.46244	-1.7401
orf19.4437	orf19.4437	Predicted ORF in Assemblies 19, 20 and 21	-0.544295	-1.08541	-0.481672	-1.42485	-1.40732	-1.051	-1.29535	-1.64909	1.17409	-1.68781
orf19.3288.1	orf19.3288.1	Predicted ORF in Assembly 20 and 21	-0.619233	-0.0844904	-0.627092	-1.42469	-0.848692	-1.22904	-1.30757	0.0149822	-1.03016	-1.76253
orf19.1797	orf19.1797	Predicted ORF in Assemblies 19, 20 and 21; induced upon biofilm formation; has GutQ domain, which is associated with phosphosugar binding	-1.39425	-1.32638	-1.16288	-1.42221	-1.45509	-1.11245	-1.29255	-3.06574	-2.78533	-1.58244
orf19.1050	orf19.1050	Predicted ORF in Assemblies 19, 20 and 21; possibly spurious ORF (Annotation Working Group prediction)	-0.492125	-0.598852	-0.571128	-1.42213	-1.2673	-1.1091	-1.26178	1.38318	1.11661	-1.33884
orf19.6227	orf19.6227	Predicted ORF in Assemblies 19, 20 and 21	-1.05795	-0.76586	-0.971894	-1.42161	-1.2913	-1.20636	-1.23582	1.29153	0.648641	-1.23287
orf19.4963	orf19.4963	Predicted ORF in Assemblies 19, 20 and 21	-0.497708	-0.589323	-0.0130965	-1.42116	-1.1666	-1.29998	-1.33621	-1.14902	-2.07201	-1.67499
orf19.7370	orf19.7370	Predicted ORF in Assemblies 19, 20 and 21	0.42181	-0.738684	-0.573669	-1.42058	-1.34949	-0.155838	-1.55487	-0.0531074	-1.48285	-1.59425
orf19.6482	orf19.6482	Predicted ORF in Assemblies 19, 20 and 21; induced by nitric oxide in yhb1 mutant; possibly spurious ORF (Annotation Working Group prediction)	-0.458096	0.245976	0.0418641	-1.42053	-1.31891	-1.10913	-1.45116	-1.98578	-2.13568	0.0595213
orf19.2660	orf19.2660	Predicted ORF in Assemblies 19, 20 and 21	-0.747268	-1.14135	-1.23638	-1.42035	-0.950069	-0.108596	-1.49112	-1.26152	1.9718	-2.63833
orf19.3490	FGR6-4	Protein lacking an ortholog in S. cerevisiae; transposon mutation affects filamentous growth	0.674871	-0.0324709	1.16477	-1.41948	-1.33962	-1.33629	-1.2522	-1.31507	1.80382	0.0786
orf19.1707	orf19.1707	Predicted ORF in Assemblies 19, 20 and 21	-1.21935	-1.27346	-1.2548	-1.4186	-1.43666	-1.20507	-1.42315	-1.48824	-1.91675	-1.1853
orf19.2231	orf19.2231	Predicted ORF in Assemblies 19, 20 and 21	-1.41878	-1.33871	-1.31119	-1.41654	-1.29633	-1.18273	-1.43389	-1.65868	-1.74282	1.0752
orf19.2501	FLC1	Protein involved in heme uptake; putative FAD transporter, similar to S. cerevisiae Flc1p; regulated by iron; macrophage-induced gene; mutant shows defect in filamentous growth	-1.39435	-1.37143	-1.34722	-1.41626	-1.40292	-1.3743	-1.4035	0.0655912	1.18095	-1.30423
orf19.3317	orf19.3317	Predicted ORF in Assemblies 19, 20 and 21	-1.38911	-0.773519	-1.21683	-1.41586	-1.39938	-1.25945	-1.26739	-1.14441	-0.112129	-1.24705
orf19.6659	GAP6	Putative general amino acid permease; Plc1p-regulated; Gcn4p-regulated; fungal-specific	-1.26009	-1.20365	-1.10104	-1.41564	-1.2817	-0.00576069	-1.29705	-1.36041	-2.13218	-2.52837
orf19.3916	orf19.3916	Predicted ORF in Assemblies 19, 20 and 21	-0.0533194	-1.09426	-0.573036	-1.41516	-0.848	-1.31054	-1.29317	-1.18217	1.24608	-1.61854
orf19.2389	orf19.2389	Predicted ORF in Assemblies 19, 20 and 21	1.14463	1.08983	1.11301	-1.41515	-0.913966	-1.0367	-1.34544	-1.74598	0.0218743	-3.71269
orf19.3672	GAL10	UDP-glucose 4-epimerase, required for galactose utilization; mutant shows cell wall defects and increased filamentation; fluconazole-induced	-0.787953	-1.01413	-0.739654	-1.41509	-1.55226	-1.21513	-1.30633	-1.69112	-4.38663	4.93115
orf19.6692	MNN7	Protein described as mannosyltransferase; identified in detergent-resistant membrane fraction	-0.515869	-0.103408	-0.0119256	-1.41483	-1.3018	-1.21311	-1.34496	-1.40024	-0.0211524	-0.330992
orf19.2794	orf19.2794	Protein regulated by Gcn4p; repressed in response to amino acid starvation	-0.67034	-0.587169	-1.1823	-1.41435	-1.2868	-1.09824	-1.30798	-1.79762	-1.94993	-1.50012
orf19.2684	orf19.2684	Predicted ORF in Assemblies 19, 20 and 21	-1.2867	-0.588704	-0.5543	-1.4124	-0.892992	-0.0407444	-0.0704064	-1.20884	1.72398	-1.29962
orf19.6784	PGA32	Putative GPI-anchored protein of unknown function; transcriptionally regulated by iron; expression greater in high iron	0.576014	-0.581743	-0.533302	-1.41223	-0.91209	-1.14653	-1.29992	-1.87145	0.022173	-3.0417
orf19.4012	PCL5	Protein similar to S. cerevisiae Pcl5p and other cyclins for Pho85p kinase; Gcn4p-induced; suppresses toxicity of C. albicans Gcn4p overproduction in S. cerevisiae via increased Pho85p-dependent phosphorylation and degradation of Gcn4p	-1.23191	-1.21064	-0.558823	-1.41104	-1.3614	-1.16092	-1.41597	-1.51232	-1.75513	-1.01649
orf19.3219	orf19.3219	Predicted ORF in Assemblies 19, 20 and 21	-1.1756	-1.2178	-1.25747	-1.4093	-1.4592	-1.29336	-1.46674	-1.57689	1.18018	1.14757
orf19.3561	orf19.3561	Predicted ORF in Assemblies 19, 20 and 21	-0.16046	-0.586191	-0.130048	-1.4088	-1.45065	-1.30904	-1.29499	-1.50859	0.0429556	-1.72248
orf19.188	orf19.188	Predicted ORF in Assemblies 19, 20 and 21	-1.44745	-1.24485	-1.41869	-1.40875	-0.720965	-1.1509	-1.24084	-1.7418	-1.52705	-1.0741
orf19.5389	FKH2	Forkhead transcription factor; morphogenesis regulator; required for wild-type hyphal transcription, cell separation, and for virulence in cell culture; mutant lacks true hyphae, is constitutively pseudohyphal	-0.688983	-1.2007	-0.643104	-1.40787	-1.65576	-1.08376	-1.33066	-1.32181	-1.16535	-1.29605
orf19.7631	orf19.7631	Predicted ORF in Assemblies 19, 20 and 21	1.1142	0.432092	0.658321	-1.4058	-0.801543	-1.18377	-1.28259	-1.66016	-0.903179	-1.53114
orf19.4643	orf19.4643	Predicted ORF in Assemblies 19, 20 and 21	1.11642	1.0597	0.0513406	-1.40496	-1.44019	-1.17352	-1.30007	1.75077	3.74786	-1.53064
orf19.7425	orf19.7425	Predicted ORF in Assemblies 19, 20 and 21	0.725313	1.10195	0.561056	-1.40448	-1.41823	-1.11648	-1.21232	-1.54279	1.98098	-2.26341
orf19.1760	RAS1	RAS signal transduction GTPase; regulates cAMP and MAP kinase pathways; role in hyphal induction, virulence, apoptosis, heat-shock sensitivity; nonessential; glutamine-rich C terminus; complements viability of S. cerevisiae ras1 ras2 mutant	-1.15245	-1.27546	-1.22552	-1.40336	-1.39524	-1.21276	-1.34385	-2.10752	-2.88146	-1.94961
orf19.4349	orf19.4349	Predicted ORF in Assemblies 19, 20 and 21	-0.511745	-0.0554705	0.624459	-1.40321	-1.3633	-1.1921	-1.24141	1.32845	1.8026	-1.29703
orf19.4889	orf19.4889	Predicted ORF in Assemblies 19, 20 and 21	-0.608837	-0.638787	-0.556002	-1.40274	-1.38595	-1.1173	-1.25304	-1.8425	-2.35984	-1.65712
orf19.172	orf19.172	Predicted ORF in Assemblies 19, 20 and 21	-1.18128	-0.569358	-0.566333	-1.40147	-1.21401	-1.08449	-1.19033	-1.15969	-1.58309	-1.69257
orf19.6748	orf19.6748	Predicted ORF in Assemblies 19, 20 and 21	-1.30104	-1.29119	-1.23196	-1.40035	-1.3928	-1.26746	-1.27947	-1.4933	-1.81011	-1.51854
orf19.4653	orf19.4653	Transcriptionally regulated by iron; expression greater in low iron; similar to GPI-linked cell-wall proteins	0.589767	-0.0104656	0.0848251	-1.39988	-1.4331	1.08645	-1.67447	-0.0144423	1.67476	1.51541
orf19.4184	orf19.4184	Predicted ORF in Assemblies 19, 20 and 21	-1.59426	-1.36743	-1.49281	-1.39784	-1.37678	-1.39706	-0.925359	-1.50974	-1.29796	-0.257867
orf19.6506	orf19.6506	Predicted ORF in Assemblies 19, 20 and 21	-1.34037	-1.24066	-1.20738	-1.39761	-1.27714	-1.18882	-1.21559	-1.39099	0.0452637	-1.78503
orf19.3476	orf19.3476	Predicted ORF in Assemblies 19, 20 and 21	-1.31798	-1.33803	-1.26175	-1.39603	-1.41689	-1.14867	-1.30025	-1.42364	-1.39492	-1.33603
orf19.5126	orf19.5126	Predicted ORF in Assemblies 19, 20 and 21	-0.583992	-0.619264	-0.592898	-1.39528	-1.24289	-1.23589	-1.30494	-0.0460268	-1.58465	-1.29566
orf19.6310	orf19.6310	Predicted ORF in Assemblies 19, 20 and 21	-1.441	-1.27678	-1.41264	-1.39437	-1.70208	-1.29509	-1.44946	-1.58547	-0.0426437	-1.80945
orf19.6798	SSN6	Functional homolog of S. cerevisiae Cyc8p/Ssn6p; Ssn6p and Tup1p regulate distinct sets of genes; hyphal growth regulator; overexpression or mutation causes avirulence in mouse IV infection; TPR motifs; repressed during hyphal growth	-1.65154	-1.2427	-1.23409	-1.39318	-0.780776	0.000394401	-0.588617	-2.1529	-1.24963	-1.97926
orf19.5274	orf19.5274	Predicted ORF in Assemblies 19, 20 and 21	-0.414835	-0.823143	-1.39632	-1.39281	-1.48141	-1.31711	-1.3425	-1.76894	-1.75461	-0.326331
orf19.73	orf19.73	Predicted ORF in Assemblies 19, 20 and 21	-1.12299	-1.18692	-1.10051	-1.39199	-1.39002	-1.07084	-1.34218	-1.22223	-2.02316	1.18761
orf19.416	orf19.416	Predicted ORF in Assemblies 19, 20 and 21	-1.59449	-1.28824	-1.43846	-1.39191	-0.696378	-1.23842	-0.00686531	-1.86152	-1.77629	-1.01783
orf19.6585	orf19.6585	Predicted ORF in Assemblies 19, 20 and 21	-1.27859	-1.06626	-1.13638	-1.39166	-1.35401	-0.132513	-1.17477	-0.0322608	-1.5148	-1.9118
orf19.4284	BUR2	Protein with similarity to S. cerevisiae Bur2p, contains a cyclin domain; not required for wild-type hyphal growth, adherence to buccal epithelial cells, or virulence in mouse systemic infection	-1.47594	-1.23744	-0.607305	-1.3912	-0.750281	0.00901428	-1.16363	-1.883	-1.3399	-1.55374
orf19.6851	CHL4	Protein described as having role in chromosome segregation; RNA abundance regulated by tyrosol and cell density	0.0547851	0.508211	0.730622	-1.39106	-1.4549	-1.16496	-0.0955589	-0.111909	1.12445	-1.8586
orf19.4553	orf19.4553	Predicted ORF in Assemblies 19, 20 and 21	-0.563363	-1.0833	-1.08535	-1.39073	-1.38745	-0.0408411	-1.34313	-1.61852	-1.10272	-1.32577
orf19.6920	orf19.6920	Predicted ORF in Assemblies 19, 20 and 21; induced upon biofilm formation; possibly spurious ORF (Annotation Working Group prediction)	-1.32505	-0.69121	-0.540469	-1.38926	-1.45763	1.01505	-1.30018	1.95004	2.34567	2.48719
orf19.3759	orf19.3759	Predicted ORF in Assemblies 19, 20 and 21	-1.12317	-1.30282	-1.15438	-1.38818	-1.33523	-1.19567	-1.38856	-1.6588	-2.43019	-2.83113
orf19.451	SOK1	Transcription is induced in response to alpha pheromone in SpiderM medium	-1.16083	-1.17655	-1.16958	-1.38741	-1.23384	-0.0358866	-1.25361	-1.48596	-1.88978	-1.56467
orf19.4280	orf19.4280	Predicted ORF in Assemblies 19, 20 and 21; possibly spurious ORF (Annotation Working Group prediction)	-1.22004	-0.0202035	-1.09836	-1.38731	-1.50923	0.0260792	-1.19879	-1.20905	1.2201	-5.42144
orf19.6026	ERG2	C-8 sterol isomerase; enzyme of ergosterol biosynthesis pathway; converts fecosterol to episterol; mutant is hypersensitive to multiple drugs; ketoconazole-induced	-0.559473	-0.0821083	-0.581252	-1.38708	-1.3107	-0.0689498	-1.41715	-1.46231	1.12686	1.30155
orf19.2079	PHHB	Transposon mutation affects filamentous growth	-1.13198	-0.575172	-1.15989	-1.3864	-1.59789	-0.0715625	-1.4161	-1.26824	-5.55971	-1.61753
orf19.4405	orf19.4405	Predicted ORF in Assemblies 19, 20 and 21	-0.030684	-1.15759	-0.650758	-1.38625	-1.27876	-1.17689	-1.32528	-1.76254	-1.37393	-2.03732
orf19.2347	MNN2	Alpha-1,2-mannosyltransferase; likely involved in iron utilization in the endocytosis pathway under iron-limiting conditions; similar to S. cerevisiae Mnn2p and Mnn5p; transposon mutation affects filamentous growth; filament induced	-0.0217093	-0.0285083	-0.526587	-1.38472	-1.32911	-1.14533	-1.25732	1.08708	1.76746	-1.16512
orf19.5243	TRP3	Predicted ORF in Assemblies 19, 20 and 21; regulated by Gcn2p and Gcn4p	-0.0208994	-1.18647	-1.14584	-1.38418	-1.32409	-1.2173	-1.3701	-0.135635	-0.0235634	-0.0755503
orf19.4348	orf19.4348	Predicted ORF in Assemblies 19, 20 and 21	-1.26509	-0.724452	-1.24223	-1.38401	-1.3225	-1.21545	-1.40492	-1.49045	-1.5733	-1.55031
orf19.2674	orf19.2674	Putative transcription factor with zinc finger DNA-binding motif; possibly spurious ORF	-0.602668	-0.608294	-0.613244	-1.38156	-1.34187	-1.27252	-1.24733	-4.25003	-3.25995	-1.29205
CaalfMp12	NAD4L	Subunit 4L of NADH:ubiquinone oxidoreductase (NADH:ubiquinone dehydrogenase), a multisubunit enzyme complex (complex I) of the mitochondrial inner membrane that catalyzes the first step in mitochondrial respiration	-0.634426	-1.40393	0.188297	-1.38117	-1.32126	-1.32587	-0.87887	-1.64613	-0.386062	-1.3435
orf19.3370	DOT4	Protein similar to ubiquitin C-terminal hydrolase; localizes to cell surface of hyphal cells, but not yeast-form cells; repressed upon high-level peroxide stress	0.0350507	-0.06287	-0.539719	-1.38091	-0.759305	-1.04764	-1.23774	-1.25449	-1.48403	-2.02532
orf19.3532	MRPL10	Predicted ORF in Assemblies 19, 20 and 21; shows colony morphology-related gene regulation by Ssn6p	-0.215503	-0.114242	-1.13553	-1.3802	-1.28896	1.03063	-1.21012	-1.27389	-1.44442	-1.31153
orf19.1136	orf19.1136	Predicted ORF in Assemblies 19, 20 and 21	-0.651733	-0.0130496	0.138774	-1.38001	-0.79988	-1.20098	-1.4117	-1.21452	-0.0400722	-1.11421
orf19.3071	orf19.3071	Predicted ORF in Assemblies 19, 20 and 21	-0.0588371	-0.05148	-1.09971	-1.37964	-1.20455	-1.21602	-1.14223	2.33536	2.42135	9.62091
orf19.5964.2	RPL35	Protein described as a ribosomal protein; downregulation correlates with clinical development of fluconazole resistance; shows colony morphology-related gene regulation by Ssn6p	-1.33774	-0.734743	-0.551741	-1.37872	-0.235251	1.00208	-1.19767	-1.73671	-1.18963	#DIV/0!
orf19.4529	orf19.4529	Protein not essential for viability	-1.34962	-1.18706	-1.16103	-1.37841	-1.25922	-1.09714	-1.1701	1.12255	1.16848	1.10218
orf19.6340	orf19.6340	Predicted ORF in Assemblies 19, 20 and 21	-1.14664	-1.0849	-0.626298	-1.37814	-1.23024	-1.12264	-1.23133	-1.13844	-1.34869	-1.39955
orf19.3556	orf19.3556	Predicted ORF in Assemblies 19, 20 and 21	-0.507574	-1.18447	-1.09192	-1.37728	-0.761084	-1.16816	-1.23358	-1.30941	-1.78797	-1.65997
orf19.2989	orf19.2989	Predicted ORF in Assemblies 19, 20 and 21	-0.557793	-0.0658782	0.0167353	-1.37723	-1.33256	-1.06321	-1.33419	-3.75154	-2.07267	-2.58741
orf19.3664	HSP31	Protein repressed during the mating process	0.0299991	-0.600548	0.658274	-1.3758	-1.46187	0.0523331	-0.0687655	-2.5233	-2.41487	-1.41084
orf19.746	orf19.746	Predicted ORF in Assemblies 19, 20 and 21	-1.68254	-1.41438	-1.50544	-1.37557	-1.46339	-1.48426	-1.4217	-1.27359	-1.50164	-1.74964
orf19.607	orf19.607	Predicted ORF in Assemblies 19, 20 and 21	-1.79334	-1.63511	-1.63214	-1.3751	-1.56525	-0.707287	-1.10767	-2.19167	-2.14055	-2.12187
orf19.1208	orf19.1208	Predicted ORF in Assemblies 19, 20 and 21	1.24747	0.005153	1.18732	-1.37494	-1.3743	-1.27475	-1.2518	-1.34379	1.82986	0.0390158
orf19.2925	orf19.2925	Predicted ORF in Assemblies 19, 20 and 21 (see Locus History Note for Assembly 19 correction)	0.607686	0.00515826	0.0106521	-1.37465	-0.668468	0.0567954	-1.24477	0.0614384	1.83134	-0.0801207
orf19.5235	orf19.5235	Protein not essential for viability	-1.1686	-1.21911	-0.574098	-1.37345	-1.35959	-1.27635	-1.28677	-1.3699	-1.53475	-1.58859
orf19.4445	orf19.4445	Predicted ORF in Assemblies 19, 20 and 21; Plc1p-regulated	-0.242256	-1.10509	0.00705055	-1.37315	-1.27986	-1.08162	-1.27304	-1.20412	-3.52375	-1.58179
orf19.5288	IFE2	Protein described as an alcohol dehydrogenase; decreased expression in hyphae compared to yeast-form cells; Efg1p-regulated; fluconazole-induced; Hog1p-induced	-0.591966	-0.618341	-0.00332695	-1.37246	-1.56264	1.043	-1.1249	-1.94035	-3.54445	-5.42861
orf19.3348	orf19.3348	Predicted ORF in Assemblies 19, 20 and 21	-1.30028	-1.19484	-1.1909	-1.37201	-1.22926	-1.08642	-1.1514	-1.44828	-1.42436	-1.20645
orf19.3161	orf19.3161	Predicted ORF in Assemblies 19, 20 and 21	-1.67346	-1.19544	-1.31748	-1.37064	-0.681759	0.00265202	-1.1484	-1.16483	-1.5929	-1.94546
orf19.1360.1	orf19.1360.1	ORF Predicted by Annotation Working Group	-1.49963	-1.36582	-1.52551	-1.37037	-1.39531	-1.44867	-1.52731	-1.47361	-0.344221	-1.71273
orf19.1697	orf19.1697	Predicted ORF in Assemblies 19, 20 and 21	-1.21001	-1.10523	-0.600102	-1.36814	-1.19871	-1.12899	-1.13499	-1.37054	-2.0147	-1.7329
orf19.7278	orf19.7278	Similar to a region of the Tca2 (pCal) retrotransposon, which is present in strain hOG1042 as 50 to 100 copies of a linear dsDNA	-1.47689	-1.56962	-1.249	-1.36764	-1.30314	-1.32317	-1.24547	-1.90886	-1.54414	#DIV/0!
orf19.3263	orf19.3263	Predicted ORF in Assemblies 19, 20 and 21	1.21084	-0.584701	-0.191679	-1.36687	-1.04352	-0.160137	-1.26045	-1.58872	1.19438	-1.2955
orf19.922	ERG11	Lanosterol 14-alpha-demethylase, member of cytochrome P450 family that functions in ergosterol biosynthesis; target of azole antifungals; may contribute to drug resistance; azole- or biofilm-induced; subject to hypoxic regulation	-1.10099	-1.09215	-0.541538	-1.36625	-1.44075	-0.0663894	-1.27487	1.72671	3.50969	1.29275
orf19.986	GLY1	L-threonine aldolase; possibly tetrameric; complements the glycine auxotrophy of an S. cerevisiae shm1 null shm2 null gly1-1 triple mutant; macrophage/pseudohyphal-induced; the GLY1 locus has an RFLP and is triploid in strain SGY269	-1.22476	-1.25988	-1.12059	-1.36605	-1.3831	-1.10286	-1.14153	-1.31745	-1.84298	-1.30752
orf19.2678	orf19.2678	Predicted ORF in Assemblies 19, 20 and 21	0.539536	0.478668	1.06602	-1.36592	-0.889152	-1.11765	-1.15885	-1.24843	1.3165	-1.8507
orf19.4268	orf19.4268	Predicted ORF in Assemblies 19, 20 and 21; downregulated in core stress response	-0.545752	-1.1268	-0.00587271	-1.36573	-1.22944	-1.17452	-1.31735	-1.81266	-2.47911	-1.99476
orf19.1082	orf19.1082	Predicted ORF in Assemblies 19, 20 and 21	-1.3096	-1.21876	-1.28604	-1.3644	-0.686106	-0.0394228	-1.36176	-1.23131	-1.68305	-1.94505
orf19.5191	FGR6-1	Protein lacking an ortholog in S. cerevisiae; transposon mutation affects filamentous growth	1.23357	0.537963	1.19984	-1.36404	-0.769777	-1.27902	-1.23488	-1.20751	1.75872	1.10547
orf19.1835	orf19.1835	Predicted ORF in Assemblies 19, 20 and 21	-0.652844	-0.0146803	-1.20472	-1.36385	-0.648937	-1.33577	-0.70125	-2.22992	-1.20787	0.0631219
orf19.4347	orf19.4347	Predicted ORF in Assemblies 19, 20 and 21; Hog1p-induced	-1.18895	-1.19594	-0.0820275	-1.36305	-1.52363	-1.13823	-1.31787	-1.66424	-2.12039	1.06651
orf19.1229	orf19.1229	Predicted ORF in Assemblies 19, 20 and 21	-1.23889	-1.36683	-1.28884	-1.36221	-1.44583	-1.19969	-1.45706	-2.14269	-2.38516	-2.19831
orf19.4517	orf19.4517	Predicted ORF in Assemblies 19, 20 and 21	-0.62279	-1.1855	-0.625638	-1.362	-0.840761	-1.15518	-1.25835	-1.17682	-1.4784	-1.41379
orf19.3804	orf19.3804	Predicted ORF in Assemblies 19, 20 and 21; filament induced	-0.631151	-1.09475	-1.1008	-1.36187	-1.27878	-1.25971	-1.28108	1.22684	1.192	-1.10243
orf19.5113	ADH2	Putative alcohol dehydrogenase; soluble protein in hyphae; fungal-specific	-0.750697	-1.24884	-0.613514	-1.36165	-1.41341	-1.12584	-1.23838	-2.24966	-4.21637	-6.51155
orf19.3225	orf19.3225	Predicted ORF in Assemblies 19, 20 and 21	-0.584659	-0.644738	-0.596065	-1.36078	-1.40394	-1.39902	-1.33437	-1.97518	-1.38656	-1.49523
orf19.4195.1	FCA1	Cytosine deaminase; enzyme of pyrimidine salvage; functional homolog of S. cerevisiae Fcy1p; mutation is associated with resistance to flucytosine	-1.15816	-1.11461	-1.12839	-1.35951	-1.40814	-1.03207	-1.23128	-2.18788	-3.09489	-1.91248
orf19.4235	PDE1	Cyclic nucleotide phosphodiesterase (PDEase), low affinity; has activity toward cGMP and cAMP; not divalent cation-dependent; complements defects of an S. cerevisiae mutant lacking PDEase; macrophage-downregulated gene	-1.2247	-1.14809	-1.2595	-1.35897	-0.770958	-1.06535	-1.15404	-2.56559	-1.20364	-2.74433
orf19.3249	LAG1	Predicted ORF in Assemblies 19, 20 and 21; amphotericin B repressed	-0.610087	-1.12391	-0.0554474	-1.35846	-1.32489	-1.22866	-1.24655	-1.35757	0.0917922	-1.07921
orf19.3114	orf19.3114	Predicted ORF in Assemblies 19, 20 and 21	-0.166977	-1.26776	-0.636928	-1.35833	-1.35554	-0.128315	-1.36075	-1.57045	-1.66388	-1.85632
orf19.4464	SEN15	Similar to delta subunit of tRNA splicing endonuclease; increased transcription is observed upon fluphenazine treatment	-0.796451	-0.143145	-1.13957	-1.3571	-1.20767	-1.24671	-1.22529	-1.6122	-2.8187	-1.78425
orf19.1296	orf19.1296	Predicted ORF in Assemblies 19, 20 and 21	-1.3495	-1.23726	-1.16184	-1.35644	-1.30873	-1.24581	-1.19158	-1.6612	-1.97775	-2.02883
orf19.3256	SLN1	Histidine kinase involved in a two-component signaling pathway that regulates cell wall biosynthesis	-1.14584	-0.559773	-0.0252003	-1.35571	-1.29485	-1.25167	-1.33116	-1.05113	-1.22885	-1.67779
orf19.6688	orf19.6688	Decreased transcription is observed upon benomyl treatment or in an azole-resistant strain that overexpresses MDR1	-1.4325	-1.28109	-0.626926	-1.35569	-1.32892	-1.07281	-1.36819	-2.06378	-6.90708	-2.73923
orf19.2287	RPA12	Protein described as DNA-directed RNA polymerase I; induced upon adherence to polystyrene	-0.612647	-0.565121	-0.0116198	-1.35537	-1.15893	-0.053006	-1.1749	-1.07645	-1.69849	-1.73914
orf19.6644	orf19.6644	Predicted ORF in Assemblies 19, 20 and 21	-1.13501	-0.888888	-0.230855	-1.35526	-1.62787	-1.15252	-1.18466	-2.86658	-3.31252	-2.28452
orf19.1146	orf19.1146	Predicted ORF in Assemblies 19, 20 and 21	-0.0479356	-0.0722639	0.55787	-1.35425	-1.36328	-1.18209	-1.25312	4.71387	7.60292	1.42447
orf19.7016	PHM5	Protein not essential for viability; similar to S. cerevisiae Phm5p, which is a vacuolar endopolyphosphatase with a role in phosphate metabolism	-1.35077	-1.14298	-1.17533	-1.35392	-1.36421	-0.0263605	-1.18814	-1.73353	-1.27082	1.30631
orf19.1298	orf19.1298	Predicted ORF in Assemblies 19, 20 and 21	-1.22558	-1.20398	-1.14563	-1.35337	-1.32885	-0.213577	-1.29226	-1.52232	-1.97552	-1.74671
orf19.5636	RBT5	GPI-anchored cell wall protein; has CRoW motif, not required for filamentous growth; expression is regulated by Rfg1p, Rim101p; repressed by Sfu1p, Hog1p, Tup1p; induced by serum, iron, alkaline pH, ketoconazole, or ciclopirox olamine	-0.0345942	-1.21028	-1.20203	-1.3533	-1.4683	1.04681	-1.31511	#DIV/0!	#DIV/0!	-1.35769
orf19.1405	PHO13	Transcription is regulated upon yeast-hyphal switch	-0.0147815	0.541759	0.0711286	-1.35308	-1.27924	0.0567562	-0.0902782	6.48474	6.69654	1.91599
orf19.51	orf19.51	Predicted ORF in Assemblies 19, 20 and 21	-1.12818	-1.13289	-1.20929	-1.35215	-1.27686	-1.07596	-1.26834	-1.49995	-1.26173	-1.33144
orf19.7358	orf19.7358	Predicted ORF in Assemblies 19, 20 and 21	-0.619781	-1.12342	-0.549931	-1.35113	-1.31353	-1.23807	-1.26625	-1.21888	-1.78757	-1.88961
orf19.1075	orf19.1075	Predicted ORF in Assemblies 19, 20 and 21; possibly spurious ORF (Annotation Working Group prediction)	0.557298	0.574494	1.19218	-1.35077	-1.57953	-1.08886	-1.38377	-4.10353	-6.28985	-1.27326
orf19.4629	orf19.4629	Predicted ORF in Assemblies 19, 20 and 21	-0.634953	-0.755403	-0.991115	-1.35049	-0.776657	-1.21301	-1.31154	-0.887274	-1.86369	-2.31395
orf19.6481	YPS7	Putative aspartic-type endopeptidase with limited ability to degrade alpha pheromone; mutants show increased sensitivity to alpha pheromone	-0.000613906	-0.66984	-1.10286	-1.34774	-0.767725	-1.189	-1.24725	-1.31624	-1.50133	-1.1345
orf19.5595	orf19.5595	Predicted ORF in Assemblies 19, 20 and 21	-0.840217	-1.18476	-1.27369	-1.34741	-1.40449	-1.22526	-1.3078	0.0504607	1.713	1.24773
orf19.6718	orf19.6718	Predicted ORF in Assemblies 19, 20 and 21	-1.17344	-1.17384	-1.19631	-1.34612	-1.20161	-1.11837	-1.24957	-1.35766	-1.79211	-1.87839
orf19.2319	orf19.2319	Predicted ORF in Assemblies 19, 20 and 21; downregulated in core stress response	-1.21323	-0.0481649	-0.0620738	-1.34585	-0.638654	-0.0577421	-1.13037	-1.27782	-1.59014	-1.69326
orf19.2642	orf19.2642	Predicted ORF in Assemblies 19, 20 and 21	-1.24847	-0.546835	-1.1442	-1.34488	-1.24368	-1.13857	-0.534382	-1.19304	1.29867	-0.125983
orf19.3630	RRP8	Predicted ORF in Assemblies 19, 20 and 21; induced upon biofilm formation	0.000185017	-0.539759	0.554886	-1.34417	-0.6082	-1.11359	-1.16826	-1.22372	-1.82721	-1.68193
orf19.7521	orf19.7521	Predicted ORF in Assemblies 19, 20 and 21	-0.677379	-1.20791	-0.535492	-1.342	-0.749025	-1.09183	-1.14154	-1.29371	-1.1855	-4.25997
orf19.6417	orf19.6417	Predicted ORF in Assemblies 19, 20 and 21	0.0178931	-0.564188	-0.535537	-1.34185	-1.22742	-1.07122	-1.17319	-1.42948	-2.28453	-1.97762
orf19.1678	orf19.1678	Predicted ORF in Assemblies 19, 20 and 21	-1.51433	-1.41539	-1.42226	-1.34142	-1.44575	-1.23492	-1.29927	-1.56261	-1.41659	-1.7485
orf19.486	orf19.486	Predicted ORF in Assemblies 19, 20 and 21	0.498695	-0.0562136	0.490698	-1.34074	-1.19537	-1.29762	-1.31658	1.78033	2.91454	0.694715
orf19.5635	PGA7	Protein described as a putative precursor of a hyphal surface antigen; putative GPI-anchor; induced by ciclopirox olamine, ketoconazole, or by Rim101p at pH 8; regulated during planktonic growth; induced during cell wall regeneration	-0.0227457	-1.12706	-0.656429	-1.34069	-1.40661	1.06862	-1.2642	1.77516	4.03681	-1.39002
orf19.475	orf19.475	Predicted ORF in Assemblies 19, 20 and 21	-0.70821	-0.990569	-0.478392	-1.34013	-0.794252	-0.704472	-1.07219	-1.25093	-1.81851	-2.31308
orf19.3063	orf19.3063	Predicted ORF in Assemblies 19, 20 and 21	0.0434059	0.501741	0.0547829	-1.34006	-1.32494	-1.12174	-1.2326	-1.71578	-1.35115	-1.8545
orf19.727	orf19.727	Predicted ORF in Assemblies 19, 20 and 21; possibly spurious ORF (Annotation Working Group prediction)	1.26585	1.06989	1.14869	-1.3388	-1.28907	-1.26534	-1.28	-1.31229	1.79948	0.0556863
orf19.4355	orf19.4355	Predicted ORF in Assemblies 19, 20 and 21	0.558153	0.00436314	0.496937	-1.33828	-0.582716	-1.21381	-1.22347	1.37415	1.63935	2.66475
orf19.1219	orf19.1219	Predicted ORF in Assemblies 19, 20 and 21	-0.548217	-0.222803	0.0200965	-1.33822	-1.30294	-1.41494	-1.52543	-0.025153	-1.81369	-1.9455
orf19.1631	ERG6	Delta(24)-sterol C-methyltransferase, converts zymosterol to fecosterol in ergosterol biosynthesis by methylating position C-24; mutation confers nystatin resistance; fluconazole-induced; transcription increased in azole-resistant strain	0.0238516	-0.583911	0.0167524	-1.3377	-1.29016	-1.12556	-1.25289	1.19141	4.26593	5.46411
orf19.2888	orf19.2888	Predicted ORF in Assemblies 19, 20 and 21	-0.676656	-1.21113	-0.883156	-1.33767	-1.24583	-1.34766	-1.31258	1.11739	1.21107	-1.1611
orf19.323	orf19.323	Predicted ORF in Assemblies 19, 20 and 21	-1.51308	-1.3993	-1.39008	-1.33751	-1.52247	-1.24966	-1.37429	-1.91017	-1.76419	-2.06265
orf19.406	ERG1	Squalene epoxidase, catalyzes epoxidation of squalene to 2,3(S)-oxidosqualene in the ergosterol biosynthetic pathway; essential; target of allylamine antifungal drugs; uses NADH as a reducing cofactor, while S. cerevisiae Erg1p uses NADPH	0.634847	0.578101	1.14828	-1.33654	-1.50135	-0.0376146	-1.23728	1.20761	2.10231	-1.32346
orf19.3613	orf19.3613	Predicted ORF in Assemblies 19, 20 and 21	-1.32706	-1.1637	-1.19544	-1.33581	-1.24699	-1.08373	-1.28662	-1.53318	-1.40783	-0.0705398
orf19.1199	NOP5	Protein similar to S. cerevisiae Nop5p protein of small nucleolar ribonucleoprotein complex; transposon mutation affects filamentous growth; macrophage/pseudohyphal-induced	-1.14212	-0.574576	-0.0579632	-1.33529	-0.181852	-1.06386	-1.13118	-1.49361	-1.87649	-1.50129
orf19.1753	PUS7	Protein similar to S. cerevisiae tRNA modification protein; induced upon biofilm formation	-1.32598	-1.10943	-0.618249	-1.33523	-0.126826	-0.0483716	-1.10067	-1.64162	-1.82956	-1.85362
orf19.4888	orf19.4888	Predicted ORF in Assemblies 19, 20 and 21; possibly spurious ORF (Annotation Working Group prediction)	-1.17726	-1.18421	-1.12041	-1.33472	-1.26471	-1.15703	-1.31694	-1.29501	-1.78193	-1.21868
orf19.6297	orf19.6297	Predicted ORF in Assemblies 19, 20 and 21	-1.15408	-0.686012	-1.13453	-1.33432	-1.30051	-1.20139	-1.20934	-1.32216	-2.08557	-2.27932
orf19.7516	orf19.7516	Predicted ORF in Assemblies 19, 20 and 21	0.620624	0.561778	1.16053	-1.33428	-1.20507	-1.07499	-1.19079	-1.35809	-1.16237	-1.64562
orf19.4617	orf19.4617	Predicted ORF in Assemblies 19, 20 and 21	-1.08005	-0.537361	0.476993	-1.33411	-1.37706	-0.0240361	-1.12931	-1.08587	1.08952	-3.41583
orf19.5646	orf19.5646	Predicted ORF in Assemblies 19, 20 and 21	-0.626287	-0.00703606	0.540357	-1.33359	-0.686406	-0.015868	-0.54234	-1.66863	-1.74597	-2.7769
orf19.7312	ERG13	Protein similar to S. cerevisiae Erg13p, which is involved in ergosterol biosynthesis; transposon mutation affects filamentous growth; amphotericin B, caspofungin repressed	-0.0774316	-0.0884312	-0.0195396	-1.33313	-1.35314	0.027912	-1.27046	1.18351	2.37666	1.04604
orf19.488	MEX67	Nuclear export protein; has NTF2-like domain; interacts with Mtr2p via the NTF2-like domain	-1.23291	-0.143109	-0.550977	-1.33283	-1.27233	-1.17978	-1.23335	-1.5172	-1.65266	-2.09241
orf19.1360	orf19.1360	Predicted ORF in Assemblies 19, 20 and 21	-1.23934	-1.19998	-1.35108	-1.33282	-1.16203	-1.03562	-1.29011	-1.13988	-1.8391	-1.5012
orf19.4492	orf19.4492	Predicted ORF in Assemblies 19, 20 and 21	-0.0410044	-0.541583	-0.0015885	-1.33267	-0.106704	-1.06955	-1.16398	-0.325757	-1.54683	-1.8868
orf19.6511	LIG1	tRNA ligase; functional homolog of S. cerevisiae Trl1p; fungal-specific	-1.26669	-1.23268	-1.16441	-1.33221	-1.26417	-1.09915	-1.25447	-1.18187	-1.4487	-1.49333
orf19.5994	RHB1	Predicted ORF in Assemblies 19, 20 and 21	-0.687571	-0.746125	-0.531929	-1.33141	-1.34654	-1.14554	-1.21272	-2.31341	-3.14027	-1.85883
orf19.657	SAM2	S-adenosylmethionine synthetase, localizes to surface of hyphal cells, but not yeast-form cells; possible biofilm-induced expression (reports differ); alkaline upregulated; Hog1p-induced	0.509169	-0.0115003	0.553795	-1.33109	-1.39192	1.04576	-1.21638	-1.03782	2.30371	1.15556
orf19.3569	orf19.3569	Predicted ORF in Assemblies 19, 20 and 21; constitutive expression independent of MTL or white-opaque status	-0.593428	-1.1823	-0.571722	-1.33083	-1.21248	0.00692912	-1.30536	-1.4802	-1.84527	-1.61523
orf19.596.2	orf19.596.2	Predicted ORF in Assembly 20 and 21; gene has intron	-0.650319	-0.0377142	0.0103777	-1.33066	-1.33489	-1.15969	-1.24365	-1.5385	-1.19495	-1.6999
orf19.7050	NOP15	Protein described as a nucleolar ribosome biogenesis factor; hyphal-induced expression	-1.03925	-1.28669	-1.25476	-1.32998	-1.19996	-1.24893	-1.35946	-1.51991	-2.20476	-2.26014
orf19.7482	orf19.7482	Predicted ORF in Assemblies 19, 20 and 21	-0.203642	0.217437	0.139609	-1.32963	-0.748721	-0.268998	-0.74048	-3.64913	-6.58917	0.439405
orf19.2606	HDA1	Histone deacetylase; regulates frequency of white-to-opaque switching, but not opaque-to-white switching; greater expression in white cells than opaque cells; has conserved deacetylation motif; inhibited by trichostatin-A	-0.648142	-1.16791	-1.08257	-1.32954	-1.25497	-1.14128	-1.18592	1.25659	1.95071	-2.12694
orf19.5043	orf19.5043	Predicted ORF in Assemblies 19, 20 and 21	-1.19935	0.0262152	0.00220022	-1.32947	-0.12678	-1.06528	-0.688855	-1.34488	1.32164	0.0603487
orf19.5912	orf19.5912	Predicted ORF in Assemblies 19, 20 and 21	-0.461179	-1.14758	-1.11658	-1.329	-0.230434	0.00905433	-1.21294	-1.33978	-1.60685	-2.08592
orf19.7345	orf19.7345	Predicted ORF in Assemblies 19, 20 and 21	-0.519194	-0.119993	-0.00544062	-1.32869	-1.2937	-1.19433	-1.26639	-1.60574	-2.09193	-1.21734
orf19.1349	orf19.1349	Predicted ORF in Assemblies 19, 20 and 21; possibly spurious ORF (Annotation Working Group prediction)	-1.36589	-0.673783	-1.21332	-1.32857	-0.814565	-1.01221	-0.156685	0.0361074	0.15712	1.41416
orf19.3972	orf19.3972	Predicted ORF in Assemblies 19, 20 and 21	0.0211361	-1.16354	-0.0113839	-1.32739	-1.3785	-1.1115	-1.19234	-1.27545	-1.6257	-1.16334
orf19.4324	orf19.4324	Predicted ORF in Assemblies 19, 20 and 21	-1.67761	-1.19108	-1.3141	-1.32676	-1.35101	-1.05302	-1.24514	-1.36134	-1.47379	0.106109
orf19.4665	orf19.4665	Predicted ORF in Assemblies 19, 20 and 21	0.620109	0.570929	0.0336434	-1.32622	-0.810207	-1.11699	-1.13996	-0.109793	1.83969	-3.40583
orf19.674	orf19.674	Predicted ORF in Assemblies 19, 20 and 21	-1.47446	-0.658002	-1.21388	-1.32581	-1.26848	-0.0541378	-0.524295	-1.80019	-2.99074	-1.13603
orf19.3986	orf19.3986	Putative transcription factor with zinc cluster DNA-binding motif; has similarity to S. cerevisiae Ppr1p, which is a transcription factor involved in the regulation of uracil biosynthesis genes	-0.683647	-1.15549	-1.21527	-1.32509	-1.32688	-1.22314	-1.44467	-1.62453	-1.74152	-0.213465
orf19.1224	FRP3	Upregulated in the presence of human neutrophils; fluconazole-downregulated; repressed by nitric oxide	0.122116	-0.017758	1.07402	-1.32425	-1.53445	1.09089	-1.37091	1.20964	-1.13487	2.44106
orf19.7284	ASR2	Gene regulated by cAMP and by osmotic stress; greater mRNA abundance observed in a cyr1 or ras1 homozygous null mutant than in wild type	-1.83003	-1.48251	-1.25606	-1.323	-1.21981	1.00977	-0.0389621	-5.86894	-6.86616	1.1368
orf19.2829	orf19.2829	Predicted ORF in Assemblies 19, 20 and 21	-0.56801	-1.12644	-0.532806	-1.32288	-0.740744	-1.08549	-1.3817	1.02918	-1.4575	-1.35685
orf19.5089	TERT	Telomerase reverse transcriptase; catalytic protein subunit of telomere synthesis; essential for telomerase activity; has telomerase-specific motif T and other conserved reverse transcriptase motifs	1.23645	1.06892	1.19725	-1.32221	-0.701772	-1.14559	-1.23465	1.15281	2.28808	-1.32055
orf19.4318	MIG1	Transcriptional repressor; regulates genes for utilization of carbon sources; Tup1p-dependent and -independent functions; upregulated in biofilm; hyphal downregulated; caspofungin repressed; functional homolog of S. cerevisiae Mig1p	-0.704437	-1.22282	-1.24539	-1.32198	-1.29925	-1.25547	-1.30155	-0.0533969	-1.62803	-1.32818
orf19.1662	orf19.1662	Predicted ORF in Assemblies 19, 20 and 21	-1.09362	-1.11625	-0.605427	-1.32169	-0.61869	-1.16065	-1.19398	-1.06613	-1.37036	-1.25301
orf19.7443	orf19.7443	Predicted ORF in Assemblies 19, 20 and 21	-0.817625	-1.2631	-0.68304	-1.32126	-0.79468	-0.000350803	-0.664582	-1.50423	-1.65701	-1.78103
orf19.526	NHP2	Predicted ORF in Assemblies 19, 20 and 21; macrophage/pseudohyphal-induced	-0.604611	-0.614307	-0.582205	-1.32122	-1.24496	-1.09817	-1.22529	-1.44342	-1.89113	-1.76348
orf19.5607	orf19.5607	Predicted ORF in Assemblies 19, 20 and 21	-0.568353	-1.15405	-1.06705	-1.32	-1.37234	-1.10872	-1.16278	-1.28535	-1.80815	-1.70958
orf19.5805	DLD1	Transcription is specific to white cell type; shows colony morphology-related gene regulation by Ssn6p	-0.535035	-1.20858	-1.14168	-1.31954	-1.30516	-1.0979	-1.32959	1.01152	-0.0126687	-1.6264
orf19.5384	CHS8	Chitin synthase required for synthesis of long-chitin fibrils; nonessential; 8 or 9 membrane spanning regions; mRNA present in yeast and hyphae; induced during cell wall regeneration; fungal-specific	0.817074	0.636411	1.26729	-1.31909	-0.678767	-1.10214	-0.714953	7.31724	9.70364	1.14878
orf19.4123	orf19.4123	Predicted ORF in Assemblies 19, 20 and 21	-1.53502	-1.18975	-1.31065	-1.31822	-1.3446	-0.0331524	-0.0798407	-1.54325	0.00537636	-1.23162
orf19.3551	orf19.3551	Predicted ORF in Assemblies 19, 20 and 21	0.525214	0.0201179	0.0482808	-1.31799	-0.711231	1.0308	-1.22981	-1.16895	15.96	-1.53868
orf19.1409.1	orf19.1409.1	Predicted ORF in Assembly 20 and 21; gene has intron	-0.534664	-0.60138	0.0012934	-1.31781	-1.30997	-1.13289	-1.34096	-1.39296	-1.60081	-2.11189
CaalfMp14	NAD4	Subunit 4 of NADH:ubiquinone oxidoreductase (NADH:ubiquinone dehydrogenase), a multisubunit enzyme complex (complex I) of the mitochondrial inner membrane that catalyzes the first step in mitochondrial respiration	-1.31579	-2.14432	0.0593091	-1.31726	-1.30112	-1.23344	-1.20916	-2.46343	-1.43426	1.4439
orf19.1193	GNP1	Protein described as similar to asparagine and glutamine permease; fluconazole or caspofungin induced; transcription is regulated by Nrg1p, Mig1p, Tup1p, Gcn2p, Gcn4p, and alkaline regulated by Rim101p; fungal-specific	-1.30097	-1.33165	-1.1881	-1.31603	-1.36067	-1.04537	-1.1531	-1.19106	-1.7012	-1.90096
orf19.6580	orf19.6580	Predicted ORF in Assemblies 19, 20 and 21; possibly spurious ORF (Annotation Working Group prediction)	-0.0122544	-0.55357	-0.569955	-1.31573	-1.27522	-1.09942	-1.27097	-1.66528	-2.03181	-2.27308
orf19.748	orf19.748	Predicted ORF in Assemblies 19, 20 and 21	-0.695617	-0.760087	-0.594331	-1.31548	-0.81591	-1.18234	-1.23401	-1.53008	-1.45164	-1.51249
orf19.3617	orf19.3617	Predicted ORF in Assemblies 19, 20 and 21 (see Locus History Note for Assembly 19 correction)	-0.660965	-0.638932	-0.545232	-1.31526	-1.2882	-1.17371	-1.26115	-0.0385671	-1.52327	-1.42034
orf19.5541	orf19.5541	Predicted ORF in Assemblies 19, 20 and 21; similar to S. pombe Nrd1p; transcription is induced upon induction of hyphal growth; regulated by Cph1p, Efg1p, Cph2p; low-level expression; alkaline upregulated; fungal-specific (no human or murine homolog)	0.520676	-1.11243	0.00139543	-1.31493	-1.24235	-1.15924	-1.16717	-1.2191	-1.35314	-1.61656
orf19.4176	orf19.4176	Predicted ORF in Assemblies 19, 20 and 21	-1.11924	-0.59522	-1.09205	-1.31458	-1.21907	-1.13997	-1.18751	-1.04899	-1.3258	-1.29103
orf19.1534	orf19.1534	Protein similar to S. cerevisiae Zrt3p, which is a transporter of zinc ions; predicted Kex2p substrate	-0.145164	-1.2444	0.00448753	-1.314	-1.46044	-0.0644381	-1.43463	-2.17273	-1.74051	-2.02643
orf19.3147	orf19.3147	Predicted ORF in Assemblies 19, 20 and 21	-1.06273	0.00790523	-1.06617	-1.31389	-1.28902	-1.10816	-1.28713	-1.46217	-2.1775	-2.05252
orf19.1234	FGR6-10	Protein lacking an ortholog in S. cerevisiae; member of a family of related proteins; transposon mutation affects filamentous growth	1.2039	-0.542654	1.15069	-1.31337	-1.32414	-1.2436	-1.29231	-1.3193	1.8467	1.03851
orf19.6696	orf19.6696	Predicted ORF in Assemblies 19, 20 and 21	-1.15131	-0.563631	-1.0858	-1.31256	-1.23064	-1.10773	-1.1703	-1.33306	-1.51519	1.30104
orf19.3722	orf19.3722	Predicted ORF in Assemblies 19, 20 and 21	0.540729	-0.591442	0.509935	-1.31236	-1.28371	-1.19902	-0.678941	-1.20671	-1.41389	-1.48386
orf19.3434	orf19.3434	Predicted ORF in Assemblies 19, 20 and 21	-1.25415	0.497449	-1.1017	-1.31216	-1.18975	-1.05521	-0.674458	-1.47278	-2.69499	1.80776
orf19.5485	MEC3	Increased transcription is observed upon benomyl treatment	0.584193	0.507776	1.14669	-1.31178	-1.18578	-1.08561	-1.09945	-1.82201	-2.45722	-2.2467
orf19.3686	orf19.3686	Predicted ORF in Assemblies 19, 20 and 21	-1.26331	-1.26127	-1.25895	-1.31151	-1.31355	-1.23532	-1.26926	-1.25252	-1.24945	-1.28262
orf19.4475	KTR4	Protein with similarity to mannosyltransferases; induced during cell wall regeneration; fungal-specific	-0.470926	-1.11083	-0.509261	-1.31149	-1.42166	-1.14478	-1.30991	-1.24636	-1.28574	-1.42475
orf19.6971	DIE2	Protein not essential for viability; similar to S. cerevisiae Die2p, which is dolichyl-phosphoglucose-dependent glucosyltransferase involved in protein N-glycosylation	0.315299	0.257481	0.718655	-1.31111	-0.979397	-0.221111	-1.14501	-1.26157	-1.36082	1.28199
orf19.1143	orf19.1143	Predicted ORF in Assemblies 19, 20 and 21	-0.730217	-0.596094	-0.64932	-1.31011	-1.26779	-1.16761	-0.673799	-1.55292	-1.14322	1.1611
orf19.3138	NOP1	Nucleolar protein; flucytosine induced	-0.582576	-1.1216	-1.05795	-1.30903	-0.74452	-1.10835	-1.27348	-1.7896	-2.44366	-1.78015
orf19.4326	orf19.4326	Predicted ORF in Assemblies 19, 20 and 21	-1.08719	-1.02545	-1.23427	-1.30901	-1.04877	-0.277937	-1.22867	-1.69772	-1.91783	-1.98505
orf19.2540	SAS3	Similar to silencing proteins; increased transcription is observed upon fluphenazine treatment	-0.644666	-0.511804	-0.535143	-1.30889	-0.658907	-0.116019	-1.15831	-1.50098	-1.0733	-1.15481
orf19.3414	orf19.3414	Predicted ORF in Assemblies 19, 20 and 21	-0.628469	-1.16779	-0.608651	-1.30744	-1.37829	-1.17519	-1.32174	-2.10861	-2.39828	-2.48719
orf19.1935	orf19.1935	Predicted ORF in Assemblies 19, 20 and 21; possibly spurious ORF (Annotation Working Group prediction)	0.148547	0.507647	1.36615	-1.3073	-1.61963	-0.0862983	-0.395909	-0.694915	-0.607964	-2.69174
orf19.6645	HMO1	High mobility group-like protein; activates pseudohyphal growth when expressed in S. cerevisiae; decreased expression in hyphae compared to yeast-form cells; amphotericin B repressed	-0.0512116	-0.560575	0.55159	-1.30684	-1.43287	-1.18762	-1.19188	-2.58135	-2.62532	-1.90086
orf19.2250	orf19.2250	Predicted ORF in Assemblies 19, 20 and 21	1.14012	0.567103	1.06574	-1.30622	-1.21039	-0.0101594	-1.19172	1.07851	0.00560467	-1.05173
orf19.4712	FGR6-3	Protein lacking an ortholog in S. cerevisiae; member of a family of related proteins; transposon mutation affects filamentous growth	1.2705	0.0100334	1.18856	-1.30567	-1.31596	-1.22296	-1.26511	-1.22816	1.81697	0.0492854
orf19.3171	ACH1	Soluble protein in hyphae; similar to S. cerevisiae Ach1p, which is acetyl-coA hydrolase required for acetate utilization; nonessential; antigenic in human; induced on polystyrene adherence; ketoconazole-induced; no human or murine homolog	-1.27938	-1.28176	-1.15316	-1.3052	-1.40176	-1.09703	-1.26401	1.073	1.41538	-0.00762673
orf19.2055	NPL6	Putative nuclear protein localization factor; fungal-specific	-1.39301	-1.32145	-1.2905	-1.30458	-1.33852	-1.10494	-1.30002	-1.58811	-1.24719	-1.61379
orf19.5568	orf19.5568	Predicted ORF in Assemblies 19, 20 and 21; possibly spurious ORF (Annotation Working Group prediction)	-1.33429	-1.2294	-1.22247	-1.30426	-1.26956	-0.0659923	-1.18244	-1.10825	1.22404	-1.05075
orf19.1883	orf19.1883	Predicted ORF in Assemblies 19, 20 and 21	1.22704	1.1518	1.21176	-1.30413	-1.39738	-1.08384	-1.16231	-0.000360416	2.2622	-1.7799
orf19.2969	RAD16	Protein similar to S. cerevisiae Rad16p; flucytosine induced	0.551343	-0.0188099	-0.00681218	-1.30361	-0.862284	1.03886	-1.07434	-2.45301	-3.47637	-1.06
orf19.3066	ENG1	Endo-1,3-beta-glucanase required for cell separation after division, orthologous to S. cerevisiae Dse4p; caspofungin repressed; fungal-specific (no human or murine homolog); repressed in response to alpha pheromone in SpiderM medium	-0.0695818	-0.144189	1.1326	-1.30321	-1.33291	-0.0324624	-1.18548	-1.69049	-1.86567	-6.43175
orf19.2183	KRE30	YEF3-subfamily ABC family protein, predicted not to be a transporter; downregulated during core stress response	0.565943	-0.545146	-0.586216	-1.30169	-1.20626	-1.14759	-1.16639	-1.34732	-1.55101	-1.692
orf19.5406	orf19.5406	Predicted ORF in Assemblies 19, 20 and 21	-0.707317	-0.321854	0.420006	-1.30167	-1.25939	-0.802874	-1.32086	-1.28668	-1.60126	-1.69354
orf19.6346	orf19.6346	Predicted ORF in Assemblies 19, 20 and 21; decreased transcription is observed in an azole-resistant strain that overexpresses MDR1	-0.587417	-1.1194	-1.09487	-1.30102	-0.714213	-1.17285	-1.23364	-1.49008	-1.80859	-1.35864
orf19.446.1	orf19.446.1	Predicted ORF in Assembly 20 and 21; gene has intron	-1.2909	-1.13653	-0.68695	-1.30049	-1.26776	-1.17212	-1.29376	1.4101	1.16388	-0.322231
orf19.6322	ARD	D-arabitol dehydrogenase, NAD-dependent (ArDH); enzyme of D-arabitol and D-arabinose catabolism; D-arabitol is a marker for active infection in humans; has conserved YXXXK motif of short-chain alcohol-polyol-sugar dehydrogenases	-0.546866	-0.534073	0.545048	-1.30022	-1.16246	-1.09014	-1.14093	1.39864	1.33133	-1.19956
orf19.35	orf19.35	Predicted ORF in Assemblies 19, 20 and 21	-0.802026	-1.29608	-0.572585	-1.29981	-1.45791	-0.0150358	-1.20332	-1.08226	-3.00459	-1.73025
orf19.3305	orf19.3305	Putative transcription factor with zinc cluster DNA-binding motif	-1.08871	-1.0948	-0.610748	-1.29971	-1.25809	-0.0923276	-1.11827	-1.33172	-1.23074	-2.78384
orf19.2827	orf19.2827	Predicted ORF in Assemblies 19, 20 and 21	-0.702215	-0.778317	-0.521068	-1.29926	-1.19319	-1.25138	-1.25648	-1.27014	-1.11956	-1.80313
orf19.5402	orf19.5402	ORF Predicted by Annotation Working Group	-1.28353	-1.18919	-1.19998	-1.29892	-1.22715	-1.11834	-1.18892	-1.11278	1.12819	-1.53012
orf19.3714	orf19.3714	Predicted ORF in Assemblies 19, 20 and 21	1.08544	0.0484962	0.0249829	-1.29844	-1.19864	-1.1953	-1.18395	1.36286	2.44816	1.45484
orf19.768	SYG1	Protein not essential for viability; similar to S. cerevisiae Syg1p, which is a plasma membrane protein that may be involved in signal transduction	-1.12986	-0.757001	-1.06695	-1.29782	-1.29168	-1.26156	-1.22033	-1.3825	-1.44856	-0.340075
orf19.7243	orf19.7243	Predicted ORF in Assemblies 19, 20 and 21	1.11383	0.594006	1.07289	-1.2978	-1.36855	-1.10029	-1.20455	-1.46545	1.35404	1.16022
orf19.1585	ZRT2	Protein described as predicted zinc transporter; ciclopirox olamine, fluconazole, or alkaline downregulated; transcriptionally induced by interaction with macrophage; amphotericin B induced	#DIV/0!	1.15921	#DIV/0!	-1.29697	-1.50798	1.19382	-1.28913	#DIV/0!	#DIV/0!	-1.46867
orf19.1510	orf19.1510	Protein not essential for viability	0.503338	-0.0028592	0.537891	-1.29657	-1.34306	-1.10952	-1.28021	-0.0340617	2.15925	1.22908
orf19.496	orf19.496	Predicted ORF in Assemblies 19, 20 and 21	1.23234	1.16482	1.1633	-1.29647	-0.746837	1.0755	-1.19354	0.00563822	1.711	-1.12039
orf19.1357	FCY21	High affinity, high capacity, hypoxanthine-adenine-guanine-cytosine/ H+ symporter; purine-cytosine permease of pyrimidine salvage; similar to S. cerevisiae Fcy2p	1.13008	0.00077102	1.18273	-1.29643	-1.29211	0.0318829	-1.10305	-0.00798161	-1.47502	-1.66891
orf19.1486	orf19.1486	Predicted ORF in Assemblies 19, 20 and 21; possibly spurious ORF (Annotation Working Group prediction)	-0.00953768	-0.0319603	-1.18099	-1.29599	-0.631877	-1.26576	-1.34141	2.68166	1.31427	3.26693
orf19.1536	orf19.1536	Predicted ORF in Assemblies 19, 20 and 21	-1.18825	-1.19747	-1.17783	-1.29492	-1.26927	-1.07148	-1.15564	-1.28428	1.04699	1.40037
orf19.105	HAL22	Putative phosphoadenosine-5'-phosphate	-0.667191	-0.661683	-0.0808696	-1.29455	-1.33748	-1.21254	-1.27762	-1.71803	-1.9664	-1.11302
orf19.6916	orf19.6916	Predicted ORF in Assemblies 19, 20 and 21	0.0246844	-1.15726	-0.674127	-1.29428	-1.19666	-1.09727	-1.27448	-1.25826	-1.87867	-0.732311
orf19.5228	RIB3	3,4-Dihydroxy-2-butanone 4-phosphate synthase; homodimeric enzyme of riboflavin biosynthesis; converts ribulose 5-phosphate to L-3,4-dihydroxy-2-butanone 4-phosphate; transcription regulated on yeast-hyphal switch, macrophage interaction	-0.643284	-0.105286	-0.649856	-1.29425	-1.39542	-0.0568743	-1.25022	-1.74339	-1.8613	-1.7206
orf19.3057	orf19.3057	Predicted ORF in Assemblies 19, 20 and 21	0.551555	0.0334229	0.544144	-1.29411	-1.29929	-1.10554	-1.14771	-1.65348	-1.47123	-1.72511
orf19.7198	orf19.7198	Predicted ORF in Assemblies 19, 20 and 21	-0.65743	-1.10362	-1.14114	-1.29386	-1.37492	-1.14974	-1.37864	-2.08843	-2.61699	-1.28853
orf19.1264	CFL2	Iron utilization protein; similar to an S. cerevisiae oxidoreductase, Ynr060Wp; regulated by Sfu1p, Nrg1p, Tup1p; alkaline (via Rim101p, low iron, fluphenazine, ciclopirox olamine, flucytosine, induced; caspofungin, amphotericin B repressed	-1.23912	-1.29431	-0.231644	-1.29384	-1.56747	1.28298	-1.36032	-6.51969	-2.11934	1.42387
orf19.4160	orf19.4160	Predicted ORF in Assemblies 19, 20 and 21	-1.11279	-1.13899	-1.11046	-1.29352	-1.20929	-1.11064	-1.10511	-1.10671	-1.4988	-2.05833
orf19.6240	orf19.6240	Predicted ORF in Assemblies 19, 20 and 21	0.0981432	0.0115206	0.623703	-1.29344	-1.31405	-1.15214	-1.15544	1.31026	1.57188	-2.06551
orf19.3962	HAS1	Functional homolog of S. cerevisiae Has1p, which is a nucleolar protein of the DEAD-box ATP-dependent RNA helicase family that is involved in biogenesis of the ribosome, particularly the small (40S) subunit; caspofungin-downregulated	-0.602613	-0.115464	-0.575464	-1.29297	-0.651937	-1.1684	-1.21412	-1.42724	-1.65893	-1.91366
orf19.3822	SCS7	Protein described as ceramide hydroxylase; transcription is regulated by Nrg1p; transcriptionally regulated by iron; expression greater in high iron; fluconazole-induced	0.663255	0.512312	0.0177036	-1.29273	-1.32616	-1.24956	-0.661457	1.35497	3.65922	-1.44065
orf19.6751	orf19.6751	Predicted ORF in Assemblies 19, 20 and 21	-0.0350648	-0.546786	-0.0283158	-1.29208	-0.638117	-1.09736	-0.580708	-0.0363373	-1.69388	-1.83832
orf19.5020	orf19.5020	Predicted ORF in Assemblies 19, 20 and 21	0.569771	-0.554681	0.574304	-1.29204	-0.0786964	-1.18719	-1.17374	-1.08565	-1.696	-1.94735
orf19.967	orf19.967	Predicted ORF in Assemblies 19, 20 and 21	-0.0359394	-1.22456	-1.16894	-1.29203	-1.3847	-0.0487609	-1.23412	-1.25897	-1.44896	-1.58681
orf19.4513	orf19.4513	Protein not essential for viability; possibly spurious ORF	-0.736769	-1.40821	-1.25328	-1.29193	-1.42783	-1.37711	-1.5184	-1.3247	-1.25922	-1.83432
orf19.6358	orf19.6358	Predicted ORF in Assemblies 19, 20 and 21	-1.19881	-1.25423	-1.23902	-1.29173	-0.734174	-1.21395	-1.26987	0.0115032	1.16388	-1.26247
orf19.187	orf19.187	Predicted ORF in Assemblies 19, 20 and 21	-1.72515	-1.24723	-1.31759	-1.29135	-0.16325	1.01855	-0.0415385	-1.53796	-1.30325	-1.03927
orf19.3428	orf19.3428	Predicted ORF in Assemblies 19, 20 and 21	-1.29297	-1.27325	-1.12962	-1.29099	-1.23383	-0.0282232	-1.14316	-1.60728	-1.97223	-1.29035
orf19.1043	orf19.1043	Predicted ORF in Assemblies 19, 20 and 21	-0.163642	-1.15287	0.0280841	-1.29094	-1.44379	-1.3788	-1.32331	-1.42559	-1.49485	-1.56478
orf19.3084	orf19.3084	Predicted ORF in Assemblies 19, 20 and 21	1.12247	0.587441	1.14755	-1.29089	-0.764501	-1.11239	-0.569583	-1.32801	-1.1221	-1.30068
orf19.4274	PUT1	Alkaline upregulated by Rim101p	0.0155658	-1.17015	-0.562867	-1.29068	-1.30138	-1.11079	-1.159	8.61672	2.17927	3.47091
orf19.1533	orf19.1533	Predicted ORF in Assemblies 19, 20 and 21	-0.533989	-1.07789	0.519666	-1.28992	-1.31046	-1.16154	-1.25764	-1.07665	-1.11782	-1.13264
orf19.2781	orf19.2781	Predicted ORF in Assemblies 19, 20 and 21	-1.33504	-1.39138	-1.37591	-1.2898	-1.29308	-1.13336	-1.39192	-1.39622	-1.60918	-2.10561
orf19.1968.1	orf19.1968.1	ORF Predicted by Annotation Working Group	-0.64936	-0.83665	-0.0422114	-1.28899	-1.16805	1.09596	-1.15073	-1.18771	-1.46257	-1.26316
orf19.921	orf19.921	Predicted ORF in Assemblies 19, 20 and 21	-1.19251	-0.540924	-1.16808	-1.28876	-0.681933	-1.09773	-1.10341	1.04498	-1.09121	-1.27799
orf19.1034	orf19.1034	Predicted ORF in Assemblies 19, 20 and 21; caspofungin repressed	-0.583684	-0.541491	-0.549667	-1.28866	-1.41544	-1.11823	-1.1137	1.01652	1.39259	-2.11274
orf19.7250	orf19.7250	Predicted ORF in Assemblies 19, 20 and 21	-1.29062	-1.10105	-1.15825	-1.288	-1.38852	1.3354	-0.668325	-1.37116	-0.0105061	1.14127
orf19.714	orf19.714	Predicted ORF in Assemblies 19, 20 and 21	0.54418	-1.17462	-0.57163	-1.28768	-1.27785	-1.37258	-1.37954	1.15119	-1.27768	-1.439
orf19.2452	orf19.2452	Transcriptionally regulated by iron; expression greater in high iron; downregulated in core caspofungin response; ketoconazole-repressed; shows colony morphology-related gene regulation by Ssn6p; possibly subject to Kex2p processing	-1.0908	-1.2789	-1.12918	-1.28702	-1.19254	-1.1742	-1.23153	2.90409	3.97875	-1.99503
orf19.7620	orf19.7620	Predicted ORF in Assemblies 19, 20 and 21	-1.42182	-0.540565	-1.17163	-1.28581	-0.691191	1.01292	-0.611553	-1.95614	-1.9018	-1.36738
orf19.6587	orf19.6587	Protein similar to S. cerevisiae Ydr152wp; transposon mutation affects filamentous growth	-1.23451	-1.19724	-1.18571	-1.28501	-1.21234	-1.08523	-1.26663	1.3719	1.19334	-1.28
orf19.603	orf19.603	Predicted ORF in Assemblies 19, 20 and 21	-0.0240743	0.488276	-0.587613	-1.28416	-0.575067	-0.0218957	-1.15926	-1.23178	-1.77287	-1.83701
orf19.5775	orf19.5775	Predicted ORF in Assemblies 19, 20 and 21	1.3181	1.07783	1.21725	-1.28384	-0.740318	-1.26577	-1.2902	-1.12803	1.72372	-0.00793469
orf19.6360	orf19.6360	Predicted ORF in Assemblies 19, 20 and 21	-1.56145	-1.18909	-1.27079	-1.28292	-0.571324	1.02159	-0.11764	-1.39098	-1.65983	-1.66383
orf19.1676	orf19.1676	Predicted ORF in Assemblies 19, 20 and 21	-0.672224	-1.22179	-0.573967	-1.28264	-1.22389	-1.02243	-0.666468	-2.4315	-4.50138	-1.91303
orf19.2018	orf19.2018	Predicted ORF in Assemblies 19, 20 and 21	-0.0331512	-0.0194766	0.00340482	-1.28238	-1.13543	-0.0150282	-1.16164	1.17209	-1.57112	-1.84242
orf19.1839	RPA190	Predicted ORF in Assemblies 19, 20 and 21;flucytosine induced	-0.556733	-1.20197	-0.0367285	-1.28182	-1.30593	-1.06984	-1.29142	-1.36169	-1.71959	-1.74962
orf19.5000	CYB2	Protein described as precursor protein of cytochrome b2; transcriptionally regulated by iron; expression greater in high iron; alkaline downregulated; shows colony morphology-related gene regulation by Ssn6p	0.737661	0.431501	0.258451	-1.28156	-1.11294	0.626547	-1.29131	0.272007	-1.94099	-4.7512
orf19.6011	SIN3	Protein similar to S. cerevisiae Sin3p (transcriptional corepressor involved in histone deacetylase recruitment); has paired amphipathic helix PAH1 domain; interacts with ScOpi1p, not CaOpi1p; transposon mutation affects filamentous growth	-1.25626	-1.23735	-1.20761	-1.28124	-1.2948	-1.18861	-1.27617	-1.51912	-1.28735	-0.0423593
orf19.349	orf19.349	Predicted ORF in Assemblies 19, 20 and 21	-1.34462	-1.23351	-1.14519	-1.28117	-1.24861	-1.24233	-1.17816	-1.83799	-2.50195	-1.182
orf19.1406	orf19.1406	Predicted ORF in Assemblies 19, 20 and 21	-0.537791	-0.576122	-1.14424	-1.28105	-0.667213	-1.18912	-1.3199	-1.23939	1.80092	-1.35418
orf19.7577	MSS51	Putative mRNA maturation factor; fungal-specific	-1.13741	-1.22035	-0.64696	-1.28039	-1.32542	-0.0275636	-1.17297	-1.31948	-1.20399	-1.18897
orf19.1282	orf19.1282	Predicted ORF in Assemblies 19, 20 and 21	-1.1095	-0.527957	0.0196269	-1.27961	-1.2716	-0.0158205	-1.16585	-1.09562	-1.07513	-2.03444
orf19.22	orf19.22	Transcription is positively regulated by Sfu1p; possibly spurious ORF	0.578946	1.07339	0.532206	-1.27938	-1.26036	1.08228	-1.21741	1.50048	2.05118	1.57978
orf19.3574	orf19.3574	Predicted ORF in Assemblies 19, 20 and 21	-0.603712	-1.18574	-0.703456	-1.27796	-1.29906	-1.11654	-1.20671	1.1436	-1.2063	-1.62532
orf19.2958	orf19.2958	Predicted ORF in Assemblies 19, 20 and 21	-0.780647	0.508414	-1.26834	-1.27744	-0.0432443	-1.12738	-0.529255	1.17165	2.10822	-1.37157
orf19.4593.1	orf19.4593.1	ORF Predicted by Annotation Working Group	-1.53146	-1.32779	-1.31112	-1.27695	-1.39136	-0.0548607	-1.25949	-2.2164	-2.03169	-1.63356
orf19.4673	orf19.4673	Predicted ORF in Assemblies 19, 20 and 21	-0.702128	-0.618067	-0.878383	-1.27582	-1.15304	-0.0662134	-1.21365	-1.29016	-2.44412	-1.26041
orf19.4167	orf19.4167	Predicted ORF in Assemblies 19, 20 and 21	-1.43501	-1.1837	-0.107776	-1.27541	-0.822397	-0.0813382	-1.35837	-1.46301	-1.71029	-1.59923
orf19.4502	orf19.4502	Predicted ORF in Assemblies 19, 20 and 21	-1.12197	-1.13482	-1.07184	-1.27509	-1.25427	1.01928	-1.20412	-1.29591	0.0278521	1.04871
orf19.2481	orf19.2481	Predicted ORF in Assemblies 19, 20 and 21; possibly spurious ORF (Annotation Working Group prediction)	0.573319	0.0338481	#DIV/0!	-1.27458	1.17934	0.0564807	-0.229559	1.69605	1.4471	2.46592
orf19.3568	RXT3	Predicted ORF in Assemblies 19, 20 and 21	-1.19161	-0.666065	-1.20289	-1.27451	-0.731173	-0.13527	-1.20142	-1.68947	-2.05157	-1.39429
orf19.6742	orf19.6742	Predicted ORF in Assemblies 19, 20 and 21	-1.28483	-1.1526	-1.16877	-1.27421	-0.206492	-1.0826	-1.203	-1.22607	1.29871	-1.142
orf19.27	orf19.27	Predicted ORF in Assemblies 19, 20 and 21; possibly spurious ORF (Annotation Working Group prediction)	-1.35986	-0.821332	-1.37857	-1.27283	-0.698338	-1.01642	-1.14828	-1.46121	-1.66138	0.0354098
orf19.6853	orf19.6853	Predicted ORF in Assemblies 19, 20 and 21	-0.684477	-1.10355	-0.561999	-1.27203	-1.25695	-1.12158	-1.09067	-1.10694	-1.13723	-1.15606
orf19.5090	orf19.5090	Predicted ORF in Assemblies 19, 20 and 21	1.20811	0.606646	1.14071	-1.27192	-0.932515	-1.11564	-0.693367	1.46553	2.61274	-1.48023
orf19.3637	orf19.3637	Predicted ORF in Assemblies 19, 20 and 21	-1.15852	-0.54887	#DIV/0!	-1.27176	-0.125966	-1.52309	0.0916967	1.07923	1.06491	-1.2605
orf19.3407	orf19.3407	Putative transcription factor with zinc finger DNA-binding motif	0.618487	0.0157101	0.65276	-1.2717	0.0459049	-0.00143817	-0.0819047	-0.121359	-0.101975	-1.74189
orf19.7426	orf19.7426	Predicted ORF in Assemblies 19, 20 and 21	0.0295228	-0.506824	0.497685	-1.27162	-1.21565	-1.2375	-1.2264	-1.14207	1.2255	1.15237
orf19.1768	orf19.1768	Predicted ORF in Assemblies 19, 20 and 21	-0.548351	-0.558265	-0.734743	-1.27157	-0.133041	1.04559	-1.15655	1.66562	2.07179	-1.49385
orf19.5092	orf19.5092	Predicted ORF in Assemblies 19, 20 and 21	0.57799	0.010103	1.09328	-1.27138	-1.25958	-1.14703	-1.19809	-1.42028	1.08619	-1.39482
orf19.4261	TIF5	Putative translation initiation factor; genes encoding ribosomal subunits, translation factors, and tRNA synthetases are downregulated upon phagocytosis by murine macrophage	0.52945	-1.11655	-0.0280241	-1.27115	-1.1756	-1.17135	-1.24195	0.0535448	-1.0826	-1.23492
orf19.5755	orf19.5755	Predicted ORF in Assemblies 19, 20 and 21	-1.14408	-1.21446	-1.13889	-1.27104	-0.767608	-1.24657	-1.35875	-1.24774	-1.69412	-1.5642
orf19.1108	HAM1	Predicted ORF in Assemblies 19, 20 and 21; caspofungin repressed; regulated by Gcn2p and Gcn4p	-0.585243	-1.16027	-0.0152914	-1.2708	-1.19919	-1.07589	-1.27871	-1.16528	-1.10949	-1.75035
orf19.789	PYC2	Putative pyruvate carboxylase, binds to biotin cofactor; gene is up-regulated in a mutant lacking the Ssk1p response regulator protein, upon benomyl treatment, or in an azole-resistant strain overexpressing MDR1	-0.0222866	-0.672959	-0.6269	-1.2707	-1.15213	-1.16507	-1.32951	-1.46764	-1.27513	-1.5844
orf19.725	orf19.725	Predicted ORF in Assemblies 19, 20 and 21	-1.24563	-0.6593	-1.3802	-1.27048	-1.36318	-1.12654	-1.31023	-1.32441	-1.44818	-1.12323
orf19.1080	orf19.1080	Predicted ORF in Assemblies 19, 20 and 21; possibly spurious ORF (Annotation Working Group prediction)	-0.568119	-0.420522	-0.57538	-1.26958	-1.27493	-1.06002	-0.464144	-1.40254	0.0322426	2.01436
orf19.6326	orf19.6326	Predicted ORF in Assemblies 19, 20 and 21	-0.0330662	-0.00404371	0.598661	-1.26941	-1.28794	-1.08382	-1.10176	-1.34529	-1.37013	-2.84151
orf19.1077	ATM1	Member of MDR subfamily of ABC family; similar to S. cerevisiae ABC transporter, Atm1p; transcriptionally regulated by iron; expression greater in low iron; induced by nitric oxide in yhb1 mutant	-1.27561	-0.637719	-1.28685	-1.26788	-1.23394	-1.18401	-1.36436	-1.20572	-1.20289	1.11962
orf19.2442	orf19.2442	Decreased transcription is observed in an azole-resistant strain that overexpresses MDR1	-1.33994	-1.16063	-1.21069	-1.26766	-1.21314	-1.13509	-1.12299	0.0553993	-1.04723	-0.0363623
orf19.150	orf19.150	Predicted ORF in Assemblies 19, 20 and 21	-1.04216	-0.519621	-0.0190701	-1.26722	-1.24864	-1.02563	-1.12331	-0.0139499	-1.38931	-1.1357
orf19.3639	orf19.3639	Predicted ORF in Assemblies 19, 20 and 21	-1.11315	-0.0328809	0.0147066	-1.26707	-0.620158	-0.0119419	-0.595277	-1.61487	-1.32843	-1.39791
orf19.3501	orf19.3501	Predicted ORF in Assemblies 19, 20 and 21; Hog1p-downregulated	0.0183582	-0.0912373	-0.578098	-1.2653	-0.699946	-1.21131	-1.16993	1.1844	1.55673	-1.2874
orf19.697	orf19.697	Predicted ORF in Assemblies 19, 20 and 21	0.0112292	-0.513859	0.0219042	-1.26518	-0.743928	-1.05334	-1.25772	-1.62456	-1.98649	-1.96907
orf19.1427	orf19.1427	Putative transporter; fungal-specific	-0.636373	-1.16932	-1.09161	-1.26494	-1.33577	-1.04419	-1.28209	1.12955	1.09221	-3.92108
orf19.1295	VAS1	Putative tRNA-Val synthetase; genes encoding ribosomal subunits, translation factors, and tRNA synthetases are downregulated upon phagocytosis by murine macrophage	-1.14817	-0.596067	-1.11261	-1.26291	-1.26162	-1.05948	-1.21881	-1.09202	-1.04537	1.06671
orf19.5160	orf19.5160	Predicted ORF in Assemblies 19, 20 and 21; similar to S. cerevisiae Sap185p and Sap190p, which are involved in regulation of the cell-cycle phosphatase Sit4p	-1.24021	-1.09658	-1.17695	-1.2606	-1.17314	-1.10809	-1.12627	-1.29788	-1.23529	-1.12179
orf19.3871	orf19.3871	Predicted ORF in Assemblies 19, 20 and 21	-0.610049	-1.06731	0.0376975	-1.25969	-1.31832	-1.10948	-1.22702	0.301672	1.24054	1.93987
orf19.6259	orf19.6259	Predicted ORF in Assemblies 19, 20 and 21	-0.585684	-1.15849	-0.00795228	-1.25931	-1.12953	-1.23858	-1.18469	-1.20941	-2.05837	-1.81606
orf19.6982	orf19.6982	Predicted ORF in Assemblies 19, 20 and 21	-1.28416	-0.608059	-1.27191	-1.25822	-0.914563	-1.08391	-1.41687	-1.52667	-1.23433	-1.53803
orf19.3585	orf19.3585	Predicted ORF in Assemblies 19, 20 and 21; regulated by Gcn4p; repressed in response to amino acid starvation (3-aminotriazole treatment)	-0.626152	-0.574736	-0.0536627	-1.25754	-0.644574	-1.29243	-1.22835	-0.175659	-1.77664	-1.83959
orf19.1426	orf19.1426	Predicted ORF in Assemblies 19, 20 and 21	0.597489	0.580354	-0.0403229	-1.25753	-0.0752553	-1.11536	-0.534798	-1.35897	1.70932	1.27425
orf19.6623	orf19.6623	Predicted ORF in Assemblies 19, 20 and 21	-1.34676	-0.0292004	-1.15557	-1.2562	-1.15934	1.06936	-1.09754	-1.50071	-1.46074	-1.33774
orf19.5039	orf19.5039	Predicted ORF in Assemblies 19, 20 and 21	0.00848001	-0.591765	0.427771	-1.25599	-0.543395	-1.08411	-1.15259	-1.02593	-1.57988	-1.72985
orf19.6531.1	TOM71	ORF Predicted by Annotation Working Group; flucytosine induced	-0.185776	-0.0132736	-0.0672129	-1.25584	-1.22756	0.00211579	-1.09127	-1.24787	-1.24159	-0.00940021
orf19.4491	ERG20	Putative farnesyl pyrophosphate synthetase involved in isoprenoid and sterol biosynthesis, based on similarity to S. cerevisiae Erg20p; likely to be essential for growth, based on an insertional mutagenesis strategy	-1.08957	-1.14212	-1.1317	-1.25539	-1.26941	-1.11527	-1.17668	1.35549	2.1875	-2.39212
orf19.687	orf19.687	Predicted ORF in Assemblies 19, 20 and 21	-0.56324	-0.506765	-0.0309245	-1.25517	-1.61008	-1.19897	-1.27786	-2.56148	0.0241766	-3.13003
orf19.6993	GAP2	Protein similar to amino acid permeases; ketoconazole, flucytosine repressed; induced by histidine, and induction requires Ssy1p; regulated by Nrg1p, Tup1p; shows colony morphology-related gene regulation by Ssn6p	0.568893	-0.526728	0.0158995	-1.25492	-1.18707	-1.06236	-1.32613	-1.49946	-2.13445	2.40778
orf19.7538	orf19.7538	Predicted ORF in Assemblies 19, 20 and 21	1.24284	1.1357	1.20028	-1.25411	-1.39927	-1.05741	-1.1482	-0.000367479	2.6604	-1.48722
orf19.3774.1	orf19.3774.1	ORF Predicted by Annotation Working Group	-1.41833	-0.0503241	-1.24982	-1.25409	-0.687035	-1.0714	-1.15016	-1.31543	1.73836	-1.57985
orf19.7086	orf19.7086	Predicted ORF in Assemblies 19, 20 and 21	-1.10907	-1.07366	-1.16252	-1.25287	-1.30649	-1.10384	-1.1696	-1.24997	-0.0131064	-2.32976
orf19.6407	orf19.6407	Predicted ORF in Assemblies 19, 20 and 21	-1.27307	-1.17424	-1.13668	-1.25279	-0.701467	-1.13141	-1.15137	-1.166	-1.42723	-0.059772
orf19.1998	orf19.1998	Predicted ORF in Assemblies 19, 20 and 21	-1.10212	-0.546088	-0.556452	-1.25266	-1.17814	-1.11696	-1.11988	-1.46361	-1.18083	-1.68365
orf19.411	orf19.411	Similar to GTPase regulators; transcriptionally regulated by iron; expression greater in low iron; possibly spurious ORF	-0.562353	-1.19626	0.162272	-1.25265	-0.714762	-1.05101	-1.14061	-1.2832	-1.89177	1.2202
orf19.3666	orf19.3666	Predicted ORF in Assemblies 19, 20 and 21	-1.15921	-1.28053	-0.528808	-1.25238	-1.27774	-1.19567	-1.17822	-1.7735	-2.0343	-1.7839
orf19.5178	ERG5	Putative C-22 sterol desaturase; fungal C-22 sterol desaturases are cytochrome P450 enzymes of ergosterol biosynthesis, catalyze formation of the C-22(23) double bond in the sterol side chain; transposon mutation affects filamentous growth	-0.00855112	-0.615722	0.0147986	-1.25158	-1.30768	-1.09882	-1.19722	1.18304	2.33688	1.71928
orf19.3228	orf19.3228	Predicted ORF in Assemblies 19, 20 and 21	-0.572902	-0.0582253	0.0407089	-1.25115	-1.19382	1.04617	-1.20668	-1.42286	-1.34016	-0.0239597
orf19.805	orf19.805	Predicted ORF in Assemblies 19, 20 and 21	-1.14943	-0.718798	-0.642518	-1.25084	-0.734268	-1.16883	-0.711797	-0.187257	-1.32982	-0.236991
orf19.2797	orf19.2797	Predicted ORF in Assemblies 19, 20 and 21	-0.701992	-0.0121147	-2.24239	-1.24985	-0.04061	0.0722767	0.00291205	-1.34123	-1.1675	1.42373
orf19.1064	ACS2	Probable acetyl-CoA synthetase, similar to known fungal acetyl-CoA synthetases; antigenic during murine systemic infection; antigenic in human; upregulated by Efg1p; macrophage-induced protein; soluble protein in hyphae	-1.10666	-0.556566	0.01238	-1.24945	-1.23834	-1.12766	-1.10317	1.68962	3.60612	-1.08984
orf19.718	orf19.718	Putative RNA polymerase I subunit	-0.048049	-0.0806591	-1.03716	-1.24895	-1.18244	-1.08035	-1.2019	1.0665	-1.42279	-2.25095
orf19.6693	orf19.6693	Predicted ORF in Assemblies 19, 20 and 21	-0.531872	-1.10984	-1.11996	-1.24878	-0.632533	-1.13454	-1.19278	-1.15191	-1.26028	-1.90671
orf19.308	orf19.308	Predicted ORF in Assemblies 19, 20 and 21	0.041665	-0.59137	1.16593	-1.2476	-0.699475	-0.0641486	-0.145758	-1.65736	-1.31477	-0.249212
orf19.7506	orf19.7506	Predicted ORF in Assemblies 19, 20 and 21	0.534268	-0.505399	-1.2432	-1.24755	-0.680796	-1.2136	-1.17902	-1.48074	0.14903	-1.40994
orf19.4569	orf19.4569	Predicted ORF in Assemblies 19, 20 and 21	-0.488164	-0.0456353	-1.19901	-1.2474	-0.616364	1.14239	-0.635112	-1.87948	0.313008	-0.149427
orf19.2270	SMF12	Protein not essential for viability; similar to S. cerevisiae Smf1p, which is a manganese transporter; Gcn4p-regulated; alkaline upregulated; caspofungin repressed	-1.17833	-1.12399	-1.08258	-1.24721	-1.22816	-1.07485	-1.17631	-1.30363	-1.20316	1.07465
orf19.3605	orf19.3605	Predicted ORF in Assemblies 19, 20 and 21	-0.734781	-0.701024	-1.0817	-1.24715	-1.22706	-1.08987	-1.25594	-0.0711777	-0.0325117	-1.21115
orf19.2369.1	ATX1	ORF Predicted by Annotation Working Group; flucytosine induced; decreased expression observed in an ssr1 homozygous null mutant	0.0262872	0.5246	0.580439	-1.24504	-0.683508	-1.10116	-1.14822	1.04298	1.04627	1.37181
orf19.1508	orf19.1508	Predicted ORF in Assemblies 19, 20 and 21	0.119821	0.0437236	0.742299	-1.24503	-1.26295	0.00478387	-1.23577	1.20361	-2.2638	-1.72326
orf19.2735	orf19.2735	Predicted ORF in Assemblies 19, 20 and 21; intron in 5'-UTR	-0.0340047	-0.514417	-0.0293264	-1.24413	-1.28012	-1.12124	-1.20976	-1.55287	-1.79521	-1.81515
orf19.769	IFE1	Protein not essential for viability; similar to S. cerevisiae Yal061wp, which is a putative polyol dehydrogenase	-0.64284	-1.19737	-0.562657	-1.24352	-1.16804	-1.26821	-1.10885	-1.80912	-1.63135	1.65911
orf19.239	orf19.239	Predicted ORF in Assemblies 19, 20 and 21; induced by nitric oxide	-0.659025	-0.716602	-0.556784	-1.24339	-1.38289	-1.17831	-1.26159	-1.57945	-1.378	-1.58681
orf19.3675	GAL7	Predicted ORF in Assemblies 19, 20 and 21; macrophage/pseudohyphal-repressed	-0.641212	-0.549779	-0.00855183	-1.24306	-1.30987	0.0734175	-1.32511	1.16756	-2.73922	-0.0853836
orf19.353	ULP1	Putative SUMO deconjugation enzyme that cleaves the small ubiquitin-like modifier	-1.16369	-1.18793	-0.644942	-1.24238	-1.18596	-1.19515	-1.15838	-1.40184	-2.38698	-2.71284
orf19.1084	CDC39	Protein similar to S. cerevisiae Cdc39p, which is part of the CCR4-NOT transcription regulatory complex; transposon mutation affects filamentous growth	-1.18046	-1.25953	-1.1858	-1.24237	-1.26498	-1.22243	-1.23347	-1.32862	-1.16561	-1.249
orf19.2172	ARA1	D-Arabinose dehydrogenase; enzyme of erythroascorbic acid biosynthesis; NADP+ cofactor; active toward D-arabinose, L-fucose, L-xylose, L-galactose; inhibited by metal ions, thiol group-specific reagents; induced on adherence to polystyrene	-0.73471	-0.118498	-0.547557	-1.24233	-0.632935	-0.114269	-0.00842962	-2.17991	-0.195602	-0.0273297
orf19.4677	orf19.4677	Predicted ORF in Assemblies 19, 20 and 21	-1.12941	-1.12615	-0.555417	-1.24181	-0.636193	-1.22665	-1.26038	-1.09314	-1.56103	-1.38734
orf19.6362	SPA2	Protein involved in cell polarity, Spitzenkorper formation; required for mouse virulence; localizes to hyphal tip; has cell-cycle regulated localization in yeast-form cells; functional domains conserved with S. cerevisiae Spa2p	-0.571902	0.0027875	-1.08726	-1.24108	-1.27057	-0.0608237	-1.11275	1.15466	1.72434	1.87091
orf19.1283	MEC1	Protein described as cell cycle checkpoint protein; RNA abundance regulated by tyrosol and cell density	-1.184	-0.600542	-1.12959	-1.24093	-0.651225	-0.0813473	-1.15668	-1.46452	1.22224	-1.85844
orf19.2489	orf19.2489	Predicted ORF in Assemblies 19, 20 and 21; repressed by nitric oxide	0.577397	0.531654	0.493439	-1.24017	-1.16405	0.0451197	-1.16112	-1.16287	-1.3832	-1.67898
orf19.5005	OSM2	Protein described as mitochondrial fumarate reductase; regulated by Ssn6p, Gcn2p, and Gcn4p; Hog1p-downregulated	1.08957	-0.520737	-0.538278	-1.23999	-1.35931	1.03255	-1.2595	1.1508	-1.80065	-7.85917
orf19.1906	orf19.1906	Predicted ORF in Assemblies 19, 20 and 21	-0.59938	0.0455257	-0.0539932	-1.23997	-1.45949	1.15337	-0.104068	-2.08116	-2.4427	1.27489
orf19.260	orf19.260	Predicted ORF in Assemblies 19, 20 and 21	-0.632961	-0.623102	-1.10634	-1.23961	-1.34176	-0.0573313	-1.24378	-1.1602	1.48705	-1.12779
orf19.7366	orf19.7366	Predicted ORF in Assemblies 19, 20 and 21	-0.638495	-1.24771	-0.148898	-1.23893	-1.30376	-0.129211	-1.24783	-1.34429	-2.1409	-2.07859
orf19.1440	orf19.1440	Predicted ORF in Assemblies 19, 20 and 21; possibly spurious ORF (Annotation Working Group prediction)	-0.0206331	-1.16643	-1.14443	-1.23859	-1.21608	-1.07273	-1.1523	-0.0138441	-1.24959	0.0458221
orf19.6563.1	orf19.6563.1	ORF Predicted by Annotation Working Group	-0.627511	-1.05674	-0.565995	-1.23842	-1.2749	0.000697485	-1.10173	-1.57935	-1.51962	-2.09072
orf19.5634	FRP1	Protein similar to ferric reductases; transcription is positively regulated by Rim101p; expression greater in low iron; fluconazole-downregulated; ciclopirox olamine induced; colony morphology-related gene regulation by Ssn6p	-0.21046	-0.744384	-1.03662	-1.23831	-1.45082	-0.207963	-1.34813	-0.192359	1.7267	1.36244
orf19.2251	AAH1	Protein not essential for viability; similar to S. cerevisiae Aah1p, which is an adenine deaminase involved in purine salvage and nitrogen catabolism; shows colony morphology-related gene regulation by Ssn6p; Hog1p-, biofilm-induced	0.0390362	1.13541	1.14499	-1.23814	0.132018	-1.27504	-0.567485	0.00568532	1.21423	-2.6052
orf19.485	orf19.485	Predicted ORF in Assemblies 19, 20 and 21	0.517449	-0.510381	0.0138603	-1.23813	-1.21872	-1.11103	-1.18069	1.15243	-1.06108	-1.0757
orf19.5136	orf19.5136	Predicted ORF in Assemblies 19, 20 and 21	-0.546706	-0.0259277	0.486258	-1.23809	-1.34802	0.0444472	-1.20261	1.23784	1.56976	-2.01019
orf19.6989	orf19.6989	Predicted ORF in Assemblies 19, 20 and 21	-0.580689	-0.551404	0.0228437	-1.23799	-0.622122	-0.0138345	-1.10764	-1.1436	-1.37299	-1.63988
orf19.1228	orf19.1228	Predicted ORF in Assemblies 19, 20 and 21	-0.569114	-0.0293627	-0.566197	-1.23625	-1.21062	-0.0862162	-0.652747	-1.20052	-1.38009	-0.0159734
orf19.2998	orf19.2998	Predicted ORF in Assemblies 19, 20 and 21	-0.686443	-0.640717	-0.628324	-1.23601	-0.825275	-0.124162	-1.30214	-1.72227	-2.80389	-2.62115
orf19.2107.1	STF2	Protein involved in ATP biosynthesis; decreased expression in hyphae compared to yeast-form cells; downregulated by Efg1p	-1.78594	-1.41509	-1.35802	-1.23516	-1.30485	0.0319933	-0.130478	-1.11598	-2.09903	-2.31552
orf19.6584	PRT1	Putative translation initiation factor; genes encoding ribosomal subunits, translation factors, and tRNA synthetases are downregulated upon phagocytosis by murine macrophage	-0.567821	-0.0486358	-0.0730556	-1.23486	-0.160262	-1.06293	-1.16505	-1.15899	-1.45243	-1.04655
orf19.969	orf19.969	Predicted ORF in Assemblies 19, 20 and 21	-0.530569	-0.568915	-0.578071	-1.23424	-1.19366	-1.11937	-1.16731	-1.34821	-1.62723	-1.49692
orf19.920	RMT2	Minor protein arginine methyltransferases	-0.574724	-0.67182	-0.00560728	-1.23424	-0.655791	-1.1353	-1.22476	-1.35393	-1.73156	-2.54476
orf19.4750	orf19.4750	Predicted ORF in Assemblies 19, 20 and 21	-0.661005	-1.2455	-1.23653	-1.23391	-1.29247	-1.15012	-1.30221	-1.40425	-2.20562	-1.60118
orf19.779	orf19.779	Predicted ORF in Assemblies 19, 20 and 21	-1.1047	-0.0415999	0.516813	-1.23367	-1.17362	-0.04982	-0.604526	-1.51232	-1.17394	-1.08462
orf19.144	SNU114	Protein likely to be essential for growth, based on an insertional mutagenesis strategy; similar to S. cerevisiae Snu114p, which is an RNA helicase involved in pre-mRNA splicing	-1.35249	-1.29695	-1.32897	-1.23319	-0.790652	-1.13412	-0.653557	-1.50322	-1.59318	-1.67622
orf19.6317	ADE6	Enzyme of adenine biosynthesis; not induced during GCN response, in contrast to the S. cerevisiae ortholog	0.0279402	-0.594281	0.0307895	-1.23262	-1.28948	-0.0297193	-1.30915	-2.21632	-2.04178	-1.72637
orf19.4544	orf19.4544	Predicted ORF in Assemblies 19, 20 and 21; possibly spurious ORF (Annotation Working Group prediction)	-1.23649	-0.0805844	-1.13076	-1.23261	-1.14567	-1.05753	-1.13644	-1.55462	-1.5681	-1.26949
[truncated: 5,320 more rows]

## Sheet: 4 fold cutoff genes
WT+(P)/WT-(P) 4 hr		tec1+(P)/tec1-(P) 4 hr		cph1+(P)/cph1-(P) 4 hr		WT+(B)/WT-(B) 4 hr		tec1+(B)/tec1-(B) 4 hr		cph1+(B)/cph1-(B) 4 hr		wor1+(B)/wor1-(B) 4 hr		WT+(B)/WT-(B) 24hr		wor1+(B)/wor1-(B) 24hr		WT+(B)/WT-(B) opaque cell 4 hr
[truncated: 259 more rows]

[truncated: 1 more sheets: 4 fold cutoff table]
