# Supplementary material for: Genetic Control of Conventional and Pheromone-Stimulated Biofilm Formation in Candida albicans
Source: PLoS Pathog. 2013 Apr 18;9(4):e1003305. doi: 10.1371/journal.ppat.1003305 (PMC3630098; doi:10.1371/journal.ppat.1003305)
Supplement: Table S4 — Microarray data comparing transcriptional changes in white cell biofilms (at 24 h) with those in opaque cell biofilms (at 4 h). Genes induced and repressed under both conditions are highlighted (orange). In addition, genes involved in adhesion (yellow), biofilm formation (red), and hyphal formation (blue), are highlighted. Overall, the data shows that transcriptional changes shared between white and opaque cells are significant (p<5×10−254 for induced genes and p<7×10−145 for repressed genes). (XLSX) [file ppat.1003305.s008.xlsx]

## Sheet: Table S4
Name	orf	Induction or repression in white (24 h)	Induction or repression in opaque (4 h)	Induction or repression of opaque cells in Spider medium (4 h) (Bennett and Johnson; 2006)
FGR23	orf19.1616	26.2188	na	Induced
FIG1	orf19.138	296.12	987.468	Induced		Induction/repression in both white and opaque cells (> or < 4 fold)
ORF19.5896	orf19.5896	1131.27	949.558	Induced (orf19.113319)		Potentially required for adhesion
MFALPHA	orf19.4481	379.554	772.477	Induced		Implicated in biofilm formation
ORF19.1827	orf19.1827	411.669	552.91	Induced (orf19.9386)		Implicated in hyphal formation
FUS1	orf19.1156	94.67	487.76	Induced
ORF19.2336	orf19.2336	181.04	159.005	No
RBT1	orf19.1327	244.438	146.491	Induced
PRM1	orf19.669	73.0896	126.282	Induced
KAR4	orf19.3736	195.273	109.213	Induced
FAV3	orf19.1914	28.3164	108.521	Induced (orf19.9470)
ORF19.4394	orf19.4394	2.07109	95.3174	Induced (orf19.11872)
ORF19.6840	orf19.6840	5.10382	89.9569	Induced (orf19.14130)
ORF19.2317	orf19.2317	45.3257	69.8253	Induced (orf19.9853)
ORF19.3735	orf19.3735	30.9298	60.4709	Induced (orf19.11220)
ORF19.635	orf19.635	62.0582	49.8989	Induced
DEM1	orf19.4392	5.95293	48.9645	No
ORF19.3378	orf19.3378	9.84335	48.3003	No
ORF19.2071	orf19.2071	148.615	39.9395	Induced (orf19.9618)
GPX2	orf19.85	13.2015	38.1861	Induced (orf19.7730)
SLF1	orf19.6826	17.5129	37.6655	Induced (orf19.14118)
ORF19.2429	orf19.2429	27.6693	37.5958	Induced (orf19.380)
SST2	orf19.4222	30.3889	35.7964	Induced
ABP2	orf19.3529	11.2269	33.4994	Induced
SAP4	orf19.5716	2.58529	33.295	Induced
HWP2	orf19.3380	1197.73	32.6919	Induced
HWP1	orf19.1321	111.176	32.5979	Induced
RAM1	orf19.5046	16.1397	23.3157	Induced
ORF19.7567	orf19.7567	16.3172	22.8026	Induced
SAP6	orf19.5542	4.46231	21.7562	Induced
ORF19.1344	orf19.1344	1.43306	19.4812	No
RBR1	orf19.535	1.38397	17.5205	No
USO5	orf19.306	9.61645	16.659	Induced (orf19.7938)
FAV2	orf19.1120	11.781	16.4767	Induced
ORF19.2125	orf19.2125	2.1438	16.4196	No
ASG7	orf19.5520	623.214	15.3013	Induced
HGT10	orf19.5753	6.50253	14.2583	No
ORF19.5256	orf19.5256	11.5598	14.156	Induced (orf19.12721)
ORF19.6487	orf19.6487	1.62365	14.1495	No
ORF19.3007.2	orf19.3007.2	1.05158	14.1089	No
PCL1	orf19.2649	-0.00249336	14.0357	Induced
ORF298	orf19.2219	21.5184	13.6328	No
CEK2	orf19.460	7.1897	13.5233	Induced
RBT4	orf19.6202	na	13.2397	Induced
BMT7	orf19.342	-1.25485	13.238	No
ORF19.5894	orf19.5894	10.1651	12.9467	No
ORF19.3888.2	orf19.3888.2	10.6978	12.8359	No
ORF19.1430	orf19.1430	-1.04507	12.6577	No
PGA23	orf19.3740	5.83437	12.0814	No
KAR5	orf19.103	4.29571	12.0674	Induced
ORF19.5290	orf19.5290	-1.1093	11.5873	No
ORF19.6563	orf19.6563	8.85911	11.1716	Induced (orf19.13916)
FAV1	orf19.3801	23.2723	11.0872	Induced (orf19.11282)
WH11	orf19.3548.1	na	10.9663	No
IFA14	orf19.7550	15.825	10.8519	Induced
PLB2	orf19.690	0.764118	10.6497	Induced (orf1.8309)
ORF19.3395	orf19.3395	4.08305	10.4006	Induced (orf19.10898)
RTA2	orf19.24	2.01902	10.1878	No
ORF19.6859	orf19.6859	236.544	10.0111	No
PGA39	orf19.6302	1.73664	10.0079	No
BNI1	orf19.4927	4.57573	9.81698	Induced
MIH1	orf19.3071	2.33536	9.62091	No
SAP30	orf19.2082	948.203	9.60262	Induced
ORF19.5978	orf19.5978	4.06061	9.54449	No
XOG1	orf19.2990	7.8227	9.50539	Induced
ORF19.3851	orf19.3851	3.06414	9.42548	Induced (orf19.11332)
ORF19.6484	orf19.6484	62.5467	9.31868	No
KAR9	orf19.5011	3.21387	9.23878	Induced
LDG3	orf19.6486	64.6879	9.1821	No
ORF19.92	orf19.92	3.13388	9.09304	No
PGA50	orf19.1824	7.3953	9.03859	No
PGA60	orf19.5588	9.35354	9.02227	No
PRN1	orf19.2467	2.4158	8.94458	Induced
ORF19.1447	orf19.1447	2.14361	8.88729	No
ORF19.6601	orf19.6601	2.5175	8.81967	No
CAN3	orf19.84	3.69955	8.79847	No
HGT12	orf19.7094	0.45944	8.73132	No
ORF19.6888	orf19.6888	1.37914	8.63355	No
SAP7	orf19.756	68.8928	7.94496	Induced
ORF19.3859	orf19.3859	3.19894	7.87636	Induced (orf19.11340)
STE2	orf19.696	19.5887	7.8339	Induced
RAD9	orf19.4275	4.27341	7.78591	Induced
ORF19.5353	orf19.5353	3.85476	7.74474	No
MTLA1	orf19.3201	2.04674	7.71403	induced
PRN1	orf19.246	1.6398	7.6961	Induced
ORF19.7296	orf19.7296	6.06679	7.66025	No
ORF19.5619	orf19.5619	4.8572	7.54674	No
ASR1	orf19.2344	-3.05428	7.48764	No
ORF19.4459	orf19.4459	1.82331	7.41808	No
ORF19.1473	orf19.1473	7.286	7.405	Induced (orf19.9048)
GST3	orf19.720	12.5478	7.40363	Induced (orf19.8339)
ORF19.3394	orf19.3394	4.20853	7.29813	Induced (orf19.10897)
ICL1	orf19.6844	2.44953	7.28187	No
ORF19.3643	orf19.3643	88.2336	7.15527	No
CHA1	orf19.1996	-7.12866	7.1257	No
CAR1	orf19.3934	-1.44297	7.04915	No
ORF19.5799	orf19.5799	1.41766	6.98604	No
MNT4	orf19.6313	3.04415	6.94254	No
ORF19.4805	orf19.4805	11.647	6.79842	Induced (orf19.12268)
ORF19.6867	orf19.6867	7.96107	6.76799	Induced
RVS162	orf19.6349	1.91783	6.64049	No
PRM9	orf19.2508	2.14025	6.63943	Induced (orf19.10044)
ORF19.5295	orf19.5295	4.31512	6.5002	Induced (orf19.12754)
MOH1	orf19.3369	3.26506	6.48178	Induced (orf19.10876)
ORF19.2202	orf19.2202	5.11193	6.47196	Induced
ORF19.4706	orf19.4706	4.15219	6.42509	Induced
PGA44	orf19.1714	10.251	6.31884	No
GIT4	orf19.1980	1.39509	6.27314	No
SAP5	orf19.5585	12.1033	6.14066	Induced
ORC4	orf19.4221	3.19997	6.11281	Induced
ORF19.2049	orf19.2049	1.11009	6.09142	No
ORF19.2509	orf19.2509	-0.682246	5.73622	No
FGR22	orf19.1586	1.6955	5.72981	No
ORF19.851	orf19.851	0.908386	5.71142	No
ORF19.5728	orf19.5728	0.951954	5.59928	No
HSP12	orf19.3160	-1.68955	5.57472	No
ORF19.4216	orf19.4216	-1.67673	5.57459	No
UGA11	orf19.854	3.96171	5.54652	No
YEA4	orf19.1382	2.86866	5.52769	Induced
ORF19.137	orf19.137	1.32958	5.4814	Induced
ERG6	orf19.1631	1.19141	5.46411	No
ORF19.4921	orf19.4921	1.83477	5.45865	No
ORF19.1383	orf19.1383	1.78253	5.43147	Induced
PLC2	orf19.5797	1.56273	5.41476	No
RNY11	orf19.3926	-1.83852	5.3913	No
ORF19.270	orf19.270	2.70375	5.37578	No
TOS1	orf19.1690	4.68809	5.35542	Induced
ORF19.1142	orf19.1142	2.48323	5.33234	Induced (orf19.8735)
MET15	orf19.5645	-1.48884	5.31376	No
AGP2	orf19.4679	1.46371	5.30686	No
ORF19.5495	orf19.5495	3.48965	5.26582	Induced (orf19.12950)
ORF19.5876	orf19.5876	3.41409	5.19717	Induced (orf19.13297)
ORF19.4508	orf19.4508	20.0092	5.17312	No
ORF19.4509	orf19.4509	15.6924	5.15748	No
CAS4	orf19.1693	1.90061	5.15334	No
ZCF26	orf19.4573	6.53403	5.10956	Induced (orf19.12042)
ORF19.2278	orf19.2278	3.77296	5.10206	Induced
ORF19.2431	orf19.2431	4.09854	4.9962	Induced (orf19.9967)
CCW14	orf19.1969	8.76141	4.97652	No
GAL10	orf19.3672	-1.69112	4.93115	No
CHS2	orf19.7298	5.78687	4.92919	Induced
GFA1	orf19.1618	10.148	4.86352	Induced
RHD1	orf19.54	1.34401	4.86331	No
ORF19.6583	orf19.6583	3.57348	4.85783	Induced (orf19.13939)
HST6	orf19.7440	54.8398	4.83532	Induced
ORF19.4507	orf19.4507	18.6126	4.8255	No
ORF19.2868	orf19.2868	1.25263	4.795	Induced (orf19.10386)
ORF19.4931	orf19.4931	2.84957	4.77032	Induced (orf19.12397)
ORF19.7456	orf19.7456	2.41417	4.75649	No
CIS2	orf19.6053	1.32869	4.71115	No
FAR1	orf19.7105	1.67541	4.67037	No
ORF19.6017	orf19.6017	1.83657	4.63407	No
HRQ2	orf19.5037	5.61089	4.60919	No
ORF19.4579	orf19.4579	1.95605	4.59789	No
CHT3	orf19.7586	1.82417	4.56918	No
AVT7	orf19.905	2.47091	4.50413	Induced (orf19.8524)
ORF19.4847	orf19.4847	1.15696	4.494	No
CPH1	orf19.4433	3.68123	4.47312	Induced
ORF19.1664	orf19.1664	1.58598	4.4502	No
PDR16	orf19.1027	1.49282	4.42821	No
AAP1	orf19.2810	12.2162	4.40814	No
ORF19.4043	orf19.4043	3.12607	4.39237	Induced (orf19.11525)
FRP2	orf19.7112	2.60422	4.38354	No
ORF19.2515	orf19.2515	1.83641	4.33889	No
ORF19.4780	orf19.4780	1.71149	4.31342	No
HAC1	orf19.2432	4.01567	4.30231	No
CAG1	orf19.4015	4.18683	4.30207	No
RIM2	orf19.4499	2.60172	4.30077	Induced
ORF19.5831	orf19.5831	5.08163	4.29665	No
KRE1	orf19.4377	14.3523	4.29195	Induced
STE18	orf19.6551.1	3.02473	4.25859	No
YHB5	orf19.3710	4.75592	4.25757	Induced (orf19.11195)
ATO1	orf19.6169	1.40811	4.25184	No
IFD3	orf19.3311	1.4919	4.24192	No
WSC4	orf19.7251	4.95845	4.2307	No
ORF19.3285	orf19.3285	-1.34496	4.21132	No
ECE1	orf19.3374	1.57789	4.20015	Induced
RGA2	orf19.4593	3.03381	4.19812	No
ORF19.5920	orf19.5920	2.75046	4.19339	No
ORF19.1608	orf19.1608	-0.0432193	4.1758	No
AMS1	orf19.2768	0.238451	4.17202	No
ORF19.1666	orf19.1666	3.61236	4.14367	Induced (orf19.9235)
MRF1	orf19.1149	-3.07871	4.12296	No
PXA2	orf19.5255	1.09938	4.10648	No
ORF19.7566	orf19.7566	9.04851	4.09367	No
ISN1	orf19.3355	1.55346	4.09131	No
FTH1	orf19.4802	-1.21926	4.08201	No
PMC1	orf19.1727	3.42822	4.03252	No
ORF19.3535	orf19.3535	4.97374	4.0298	No
CST5	orf19.2127	5.37525	3.58517	Induced
PUT1	orf19.4274	8.61672	3.47091	No
CEK1	orf19.2886	11.666	3.41543	Induced
ORF19.3908	orf19.3908	6.83662	3.3661	No
CPP1	orf19.4866	8.60731	3.36119	Induced
ORF19.2430	orf19.2430	38.4296	3.33175	No
ORF19.849	orf19.849	352.621	3.31878	No
MYO2	orf19.5015	4.69622	3.29785	Induced (orf19.12482)
RHD3	orf19.5305	12.0558	3.19516	No
STE50	orf19.1636	5.14798	3.18568	No
ORF19.344	orf19.344	4.48598	3.15988	No
ORF19.1122	orf19.1122	52.2971	3.15945	Induced (orf19.8720)
AXL1	orf19.7342	6.52526	3.15528	Induced
ORF19.3982	orf19.3982	4.8653	3.14868	Induced (orf19.11465)
RAM2	orf19.4817	15.3224	2.97579	induced
ORF19.6864	orf19.6864	5.70914	2.95602	No
PHR1	orf19.3829	16.4674	2.74153	No
ORF19.7305	orf19.7305	28.8001	2.72811	No
SSU1	orf19.7313	4.7188	2.69145	No
ORF19.7167	orf19.7167	583.385	2.6455	No
ORF19.4666	orf19.4666	4.05418	2.64068	No
PGA31	orf19.5302	535.621	2.62079	No
PBR1	orf19.6274	425.605	2.5733	No
GPX1	orf19.87	5.98565	2.51249	No
FRP6	orf19.3441	4.39124	2.32299	No
ORF19.7299.1	orf19.7299.1	4.28163	2.31378	No
PTH2	orf19.4231	5.02255	2.26051	No
PUT2	orf19.3974	5.94936	2.25704	No
ORF19.2220	orf19.2220	6.29471	2.25125	No
ORF19.4668	orf19.4668	4.78364	2.23154	No
ORF19.6277	orf19.6277	-5.74419	2.14306	No
SAP2	orf19.3708	-9.78604	2.14206	Repressed
ARG3	orf19.5610	10.4236	2.10317	No
ORF19.1766	orf19.1766	5.09665	2.0615	No
EXG2	orf19.2952	17.0561	2.05435	No
PCL2	orf19.403	-4.6511	2.03207	No
UAP1	orf19.4265	6.31921	1.94722	Induced (orf19.11741)
PHO13	orf19.1405	6.48474	1.91599	No
ORF19.1539	orf19.1539	44.4763	1.88714	No
ORF19.2175	orf19.2175	-4.39671	1.88365	No
GNA1	orf19.837	4.21921	1.87512	No
ORF19.1144	orf19.1144	5.0878	1.85892	No
IDP2	orf19.3733	12.2783	1.78447	No
ORF19.2638	orf19.2638	219.755	1.74311	No
ALK8	orf19.10	5.99194	1.66591	No
PGA54	orf19.2685	5.15153	1.66369	No
ORF19.5069	orf19.5069	6.69299	1.60678	No
ORF19.6559	orf19.6559	4.47291	1.51037	No
ORF19.3461	orf19.3461	10.5969	1.4981	No
ORF19.2754	orf19.2754	4.39323	1.4897	No
MNN4-4	orf19.5557	29.1228	1.46779	No
SOD1	orf19.2770.1	4.58482	1.45622	No
ORF19.1146	orf19.1146	4.71387	1.42447	No
CFL2	orf19.1264	-6.51969	1.42387	No
ORF19.862	orf19.862	10.6877	1.40869	No
ORF19.217	orf19.217	156.039	1.40387	No
PGA61	orf19.5762	34.0312	1.36934	No
ORF19.4607	orf19.4607	12.2641	1.36772	No
ORF19.5517	orf19.5517	7.98454	1.3276	No
ORF19.1780	orf19.1780	-10.3938	1.29764	No
CRH11	orf19.2706	17.5704	1.26353	No
RAS2	orf19.5902	8.3609	1.23696	No
ORF19.1844	orf19.1844	8.4837	1.21984	No
CUP9	orf19.6514	5.29369	1.20589	Induced
LYS2	orf19.2970	12.8924	1.16868	No
SOD5	orf19.2060	41.9748	1.15595	No
CHS8	orf19.5384	7.31724	1.14878	No
ASR2	orf19.7284	-5.86894	1.1368	No
ORF19.4245	orf19.4245	8.92028	1.13338	No
ORF19.2124	orf19.2124	4.01981	1.13239	No
ORF19.7077	orf19.7077	4.97015	1.11667	No
ORF19.6200	orf19.6200	9.85031	1.11579	No
EAP1	orf19.1401	59.8799	1.0921	No
ORF19.7170	orf19.7170	22.5349	1.08607	No
YHB1	orf19.3707	5.05391	1.07457	No
ORF19.1830	orf19.1830	7.38144	0.77211	No
ORF19.1774	orf19.1774	8.02693	0.641542	No
HAP3	orf19.4647	-4.15531	0.473946	No
ORF19.1722	orf19.1722	13.6612	0.418374	No
ORF19.2552	orf19.2552	4.72397	0.302121	No
ZFU2	orf19.6781	10.6938	0.195563	No
FMA1	orf19.6837	5.17527	0.0718109	No
IFF11	orf19.5399	11.0617	0.049711	No
ORF19.5393	orf19.5393	4.02325	0.0167418	No
ORF19.2203	orf19.2203	6.66683	0.016624	No
ORF19.5212	orf19.5212	-4.20392	0.00261551	No
CFL11	orf19.701	292.33	-0.0134192	No
CDG1	orf19.7314	7.0908	-0.136779	No
ORF19.4690	orf19.4690	-9.61349	-0.186529	No
ORF19.855	orf19.855	5.15631	-0.208779	No
ORF19.2505	orf19.2505	-8.12948	-0.259051	No
IFF5	orf19.2879	4.11246	-0.263256	No
IHD1	orf19.5760	7.49286	-0.287241	No
ORF19.1117	orf19.1117	14.9716	-0.337412	No
ORF19.1651	orf19.1651	20.8029	-0.659636	No
HGC1	orf19.6028	131.86	-0.667309	No
ORF19.1123	orf19.1123	8.92734	-1.03819	No
ORF19.1724	orf19.1724	9.61012	-1.07923	No
ORF19.7336	orf19.7336	-11.4025	-1.08994	No
ORF19.7606	orf19.7606	36.7777	-1.11906	No
ORF19.2177	orf19.2177	-4.69984	-1.22816	No
GCV1	orf19.5519	-4.28432	-1.24609	No
ORF19.3444	orf19.3444	16.8586	-1.25459	No
ORF19.1075	orf19.1075	-4.10353	-1.27326	No
ORF19.2674	orf19.2674	-4.25003	-1.29205	No
PLB4.5	orf19.1442	-4.2961	-1.33454	No
ORF19.7130	orf19.7130	4.5617	-1.34856	No
ALS4	orf19.4555	-26.7413	-1.35721	No
ORF19.3869	orf19.3869	-5.47278	-1.40299	No
ORF19.2457	orf19.2457	62.561	-1.41141	No
ORF19.3499	orf19.3499	19.5904	-1.44691	No
EBP1	orf19.125	4.40796	-1.55188	No
ORF19.7455	orf19.7455	14.7922	-1.55601	No
ORF19.2449	orf19.2449	4.01505	-1.55644	No
ORF19.6315	orf19.6315	6.70335	-1.61304	No
ORF19.2795	orf19.2795	5.52228	-1.71832	No
MCM2	orf19.4354	-5.26899	-1.77087	No
ORF19.6282	orf19.6282	10.6051	-1.77232	No
PGA11	orf19.7609	65.6866	-1.92535	No
ORF19.4792	orf19.4792	6.04579	-1.95341	No
ORF19.2459	orf19.2459	6.88568	-1.95664	No
CWH8	orf19.3682	-4.68092	-2.02618	No
ORF19.320	orf19.320	-20.6016	-2.04441	No
PGA45	orf19.2451	4.28519	-2.04859	No
PGA13	orf19.6420	49.2888	-2.05197	No
ORF19.467	orf19.467	4.9908	-2.11991	No
CRZ2	orf19.2356	-8.06585	-2.19521	No
ORF19.1239	orf19.1239	20.1736	-2.21865	No
IFD6	orf19.1048	-4.35372	-2.35399	No
ORF19.6996	orf19.6996	4.61671	-2.47427	No
ORF19.1562	orf19.1562	21.9892	-2.56159	Repressed (orf19.9135)
MCM3	orf19.1901	-4.15271	-2.83277	No
ORF19.4390	orf19.4390	-4.09965	-2.84422	Repressed
CDC54	orf19.3761	-5.51871	-2.88773	No
ORF19.3780	orf19.3780	-4.55992	-2.9942	No
NHP6A	orf19.4623.3	-4.349	-3.01925	No
CDC6	orf19.5242	-16.0903	-3.03129	No
ORF19.6737	orf19.6737	-5.77024	-3.04081	No
OGG1	orf19.7190	-6.79005	-3.09018	No
ORF19.6342	orf19.6342	-4.06389	-3.16682	No
ORF19.1606	orf19.1606	-5.51287	-3.17959	No
ORF19.6586	orf19.6586	-4.20637	-3.38693	No
RNR22	orf19.1868	-5.02792	-3.4856	No
ORF19.1090	orf19.1090	-4.22727	-3.66416	No
YCG1	orf19.1622	-1.78354	-4.00151	No
ORF19.4030	orf19.4030	-2.42678	-4.01535	No
PSF1	orf19.6910	-3.47861	-4.01585	No
BMT1	orf19.6782	-2.6357	-4.04205	No
ORF19.2796	orf19.2796	-3.77875	-4.05866	No
ASM3	orf19.6037	-1.29064	-4.05879	No
CCE1	orf19.3264	-2.47131	-4.08286	No
ORF19.2870	orf19.2870	1.38349	-4.08868	No
ORF19.1667.1	orf19.1667.1	-0.038091	-4.10598	No
CDC46	orf19.5487	-6.02614	-4.11868	Repressed
ORF19.9	orf19.9	-2.30533	-4.16296	No
CDR4	orf19.5079	-4.39218	-4.19093	No
AGA1	orf19.935	13.6773	-4.23393	No
REP1	orf19.7521	-1.29371	-4.25997	No
RGS2	orf19.695	-3.69853	-4.2645	No
MCM6	orf19.2611	-5.74395	-4.26618	Repressed
CDC20	orf19.122	-0.0509299	-4.40105	No
ORF19.6247	orf19.6247	-3.91417	-4.50178	No
MSH2	orf19.3093	-1.89347	-4.51621	No
SWE1	orf19.4867	-3.92048	-4.52509	Repressed
OP4	orf19.4934	-0.0507856	-4.53924	Repressed
HCM1	orf19.4853	-5.60907	-4.64604	No
ORF19.1507	orf19.1507	-2.32892	-4.66114	No
ORF19.4068	orf19.4068	-2.24851	-4.66645	No
HTB1	orf19.6925	-2.25018	-4.67768	No
POL1	orf19.5873	-2.55839	-4.72078	No
CYB2	orf19.5000	0.272007	-4.7512	No
PGA34	orf19.2833	0.438315	-4.76457	Repressed
ORF19.413	orf19.413	-1.33303	-4.8089	No
ORF19.4169	orf19.4169	-4.28272	-5.06781	No
ORF19.3793	orf19.3793	-7.58488	-5.12713	No
ORF19.1735	orf19.1735	-3.79944	-5.13841	No
POL2	orf19.2365	-2.89356	-5.1972	No
ORF19.5262	orf19.5262	-1.24574	-5.20869	No
RAD54	orf19.5004	-1.77056	-5.26061	No
PRI2	orf19.2885	-3.72366	-5.36395	No
ORF19.1999	orf19.1999	-0.160451	-5.37763	No
ORF19.4280	orf19.4280	-1.20905	-5.42144	No
IFE2	orf19.5288	-1.94035	-5.42861	No
ORF19.1611	orf19.1611	-2.11225	-5.45486	No
SMC3	orf19.262	-4.89574	-5.49613	No
CHT1	orf19.7517	-1.94337	-5.52016	No
ORF19.1577	orf19.1577	-3.4918	-5.54004	No
GIT2	orf19.1978	1.83046	-5.55983	Repressed
CCN1	orf19.3207	-4.6685	-5.61218	No
IFF6	orf19.4072	1.09962	-5.62386	No
YVC1	orf19.2209	-2.02564	-5.64458	Repressed
ORF19.3100	orf19.3100	-2.85508	-5.66164	Repressed
IRR1	orf19.7232	-3.17015	-5.67126	No
SCW4	orf19.2941	-1.30615	-5.73076	No
ORF19.1541	orf19.1541	-2.12435	-5.74305	Repressed
UCF1	orf19.1354	0.61621	-5.79099	No
PGA17	orf19.893	-0.734957	-5.82833	Repressed (orf19.8512)
DPB2	orf19.7564	-5.96699	-5.89311	No
RME1	orf19.4438	1.81682	-5.96932	No
ORF19.7283	orf19.7283	-1.71218	-5.98563	No
RSN1	orf19.347	-2.19446	-6.00731	No
NAT4	orf19.4664	-1.67257	-6.13063	No
NUP	orf19.6570	-0.90873	-6.18081	No
CDC21	orf19.3549	-1.89097	-6.1906	No
MPH1	orf19.2919	-2.85514	-6.20598	No
CTF5	orf19.3494	-2.79155	-6.22921	Repressed
CSE4	orf19.6163	-3.44187	-6.35959	No
ORF19.4940	orf19.4940	0.00633862	-6.38869	No
ENG1	orf19.3066	-1.69049	-6.43175	Repressed (orf19.10584)
ORF19.915	orf19.915	-2.56923	-6.5027	No
ADH2	orf19.5113	-2.24966	-6.51155	No
RNR1	orf19.5779	-3.86307	-6.59559	No
ORF19.1052	orf19.1052	-3.30712	-6.68907	No
ORF19.7330	orf19.7330	1.15053	-6.71975	No
HTA2	orf19.1051	-3.40448	-6.76888	No
HHF1	orf19.1059	-2.96234	-6.78806	No
ORF19.2227	orf19.2227	-3.80487	-6.79004	No
LAP3	orf19.539	-2.20198	-6.85681	Repressed
ORF19.4080	orf19.4080	-5.30915	-6.89188	No
ASH1	orf19.5343	-2.12839	-7.01946	No
PMS1	orf19.1605	-3.74912	-7.20052	No
DUT1	orf19.3322	-6.87733	-7.23191	No
ACE2	orf19.6124	-3.66852	-7.29138	No
ORF19.3902	orf19.3902	-0.9856	-7.56164	No
POL30	orf19.4616	-6.1519	-7.80565	Repressed
OSM2	orf19.5005	1.1508	-7.85917	No
PGA26	orf19.2475	-2.32788	-7.8648	No
HHO1	orf19.5137.1	-2.62347	-8.0008	No
ORF19.2460	orf19.2460	-0.233922	-8.06682	Repressed (orf19.9997)
PGA28	orf19.5144	-1.85209	-8.47491	No
MSH6	orf19.4945	-2.90425	-8.8183	No
ESC4	orf19.1445	-6.0749	-8.90189	No
CTF8	orf19.576	-6.8816	-9.00251	No
HHF22	orf19.1854	-3.41092	-9.62642	No
MCD1	orf19.7634	-5.90185	-10.2748	Repressed
ORF19.6741	orf19.6741	1.21893	-10.289	No
INT1	orf19.4257	-2.39673	-10.5546	Repressed (orf19.11733)
CDC5	orf19.6010	-3.09976	-10.5679	No
ORF19.4301	orf19.4301	-4.4231	-10.6487	No
FCY24	orf19.7331	-1.35741	-10.9143	No
HTA1	orf19.6924	-2.80423	-11.3434	No
ORF19.2512	orf19.2512	-4.74613	-11.9182	No
ORF19.668	orf19.668	-6.33843	-12.3534	No
CHS1	orf19.5188	-1.2616	-13.38	Repressed
KIP2	orf19.1747	-3.45361	-14.4036	Repressed (orf19.9315)
ORF19.5137	orf19.5137	-2.75184	-14.5618	No
ORF19.1334	orf19.1334	-4.2327	-14.8583	Repressed
HOF1	orf19.5664	-2.4181	-15.7806	No
NRM1	orf19.6022	-5.52488	-16.0147	No
RBE1	orf19.7218	-24.3416	-16.6543	No
DSE1	orf19.3629	-5.17016	-18.8783	No
HHT2	orf19.1853	-3.89131	-19.3868	No
HHT21	orf19.1061	-3.96215	-19.5487	No
ORF19.4450.1	orf19.4450.1	-2.29508	-19.621	No
ORF19.1522	orf19.1522	-4.09215	-22.413	No
ORF19.6008	orf19.6008	-2.72018	-22.7043	Repressed
ORF19.557	orf19.557	-7.82986	-23.8784	No
ORF19.95	orf19.95	-4.90487	-26.816	No
ORF19.5267	orf19.5267	-16.5315	-32.3969	Repressed
FGR41	orf19.4910	-8.30374	-42.0637	No
SCW11	orf19.3893	-12.0409	-46.3761	No
PGA38	orf19.2758	-9.73112	-46.3909	No
